# Supplementary material for: Palladium(ii)-catalyzed γ-selective hydroarylation of alkenyl carbonyl compounds with arylboronic acids
Source: PubMed Central journal article supplement — Chem Sci. 2018 Sep 6;9(44):8363–8. doi: 10.1039/c8sc03081b (PMC6247822; doi:10.1039/c8sc03081b), 2018-09-06
Supplement: SC-009-C8SC03081B-s003.pdf [file SC-009-C8SC03081B-s003.pdf]

## SUPPORTING INFORMATION

### Palladium(II)-Catalyzed $\gamma$ -Selective Hydroarylation of Alkenyl Carbonyl Compounds with Arylboronic Acids

Rei Matsuura<sup>a</sup>, Tanner C. Jenkins<sup>a</sup>, David E. Hill<sup>a</sup>, Kin S. Yang<sup>a</sup>, Gary M. Gallego<sup>b</sup>, Shouliang Yang<sup>b</sup>, Mingying He<sup>b</sup>, Fen Wang<sup>b</sup>, Rohan P. Marsters<sup>a</sup>, Indrawan McAlpine<sup>b</sup>, and Keary M. Engle<sup>\*a</sup>

<sup>a</sup> Department of Chemistry, The Scripps Research Institute, 10550 N. Torrey Pines Road, La Jolla, California 92037, United States

<sup>b</sup> Pfizer Oncology Medicinal Chemistry, 10770 Science Center Drive, San Diego, California 92121, United States

#### Contents

|                                                                             |     |
|-----------------------------------------------------------------------------|-----|
| General Information.....                                                    | 2   |
| Screen of Directing Groups .....                                            | 3   |
| Substrate Synthesis .....                                                   | 4   |
| Screen of Different Sources of Phenylboronic Acid / Addition of Water ..... | 5   |
| Screen of Hydroarylation for Polar Boronic Acids .....                      | 8   |
| Examination of Alternative of Organoboron Coupling Partners .....           | 9   |
| General Procedures for Evaluating Boronic Acid Scope .....                  | 10  |
| General Procedure for Evaluating Alkene Scope.....                          | 28  |
| Large-Scale Synthesis and Deprotection .....                                | 36  |
| Procedures for Deuterium Incorporation Studies.....                         | 37  |
| General Procedure For Kinetic Experiments .....                             | 48  |
| Analysis by Gas Chromatography with Flame Ionization Detection .....        | 49  |
| Kinetic Data.....                                                           | 51  |
| References .....                                                            | 56  |
| Selected <sup>1</sup> H and <sup>13</sup> C NMR Spectra .....               | 57  |
| X-ray Crystallographic Methods and Results for <b>3j</b> .....              | 134 |

## General Information

Unless stated otherwise, all materials were used as received from commercial sources without further purification. THF and diisopropylamine were purified by a Grubbs-type solvent purification system prior to use. DCM, MeCN, and DMF were purchased from Aldrich and used as received. 1-Dram reaction vials and caps were purchased from ChemGlass (Cat#: CG-4904-05) with TFE septa. Ambient temperature refers to 21–24 °C. Low temperatures were maintained using ice/water (0 °C) and acetone/dry ice (–78 °C) baths. Elevated temperatures were maintained by an Ika heating block for 1-dram vials or a silicon oil bath for larger vessels. Thin-layer chromatography (TLC) was performed using EMD Millipore 250 mm silica gel F-254 plates (250 µm) with F-254 fluorescent indicator and visualized by UV fluorescence quenching, iodine, Seebach's stain, or potassium permanganate stain. SiliCycle SiliaFlash P60 silica gel (particle size 40–63 µm) was used for flash chromatography. <sup>1</sup>H and <sup>13</sup>C NMR spectra were recorded on a Bruker DRX-600 MHz equipped with a 5mm DCH cryoprobe (600 MHz and 150 MHz, respectively). <sup>19</sup>F spectra were recorded on a Bruker DPX-400 MHz and peaks referenced to hexafluorobenzene. Spectra were internally referenced to Me<sub>4</sub>Si or residual solvent signals. High-resolution mass spectra (HRMS) were recorded on an Agilent LC/MSD TOF mass spectrometer. Gas chromatography measurements were acquired with an Agilent Technologies 7890A gas chromatography (USA) equipped with a flame ionization detector and with a DB-5 column (polyimide coating, 30 m 0.25 mm x 0.25 µm) manufactured by J&W.

### Chemicals and Suppliers:

Alfa Aesar: Vinyl acetic acid, crotonic acid, diethylamine

Oakwood: 8-Aminoquinoline, EDC, HATU, hydroxybenzotriazole, phenylboronic acid

Fisher: Diisopropylamine, potassium *tert*-butoxide

Aldrich: *t*-butanol, *n*-butyl lithium (2.5 M in hexanes), solvents used for purification

TCI: Benzotrifluoride, *tert*-amyl alcohol

## Screen of Directing Groups

Table S1. Directing Group Optimization<sup>a</sup>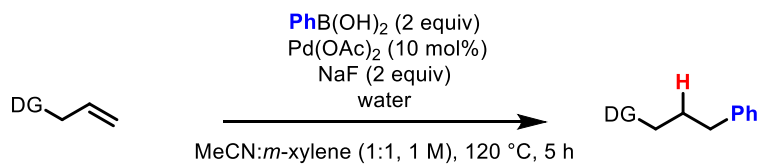

| Entry          | Directing Group | % SM | % yield |
|----------------|-----------------|------|---------|
| 1              |                 | 46%  | trace   |
| 2              |                 | 20%  | trace   |
| 3 <sup>b</sup> |                 | 46%  | trace   |
| 4              |                 | 6%   | 48%     |

<sup>a</sup> Reaction conditions: alkene (0.1 mmol), Pd(OAc)<sub>2</sub> (10 mol%), NaF (2 equiv), phenylboronic acid (2 equiv), MeCN:*m*-xylene (1:1, 0.1 mL), water (2.5 equiv), 120 °C, 5 h. Yields based on <sup>1</sup>H NMR analysis of the crude reaction mixture with dibromomethane as an internal standard. <sup>b</sup> PhCF<sub>3</sub> (1 mL), 80 °C, 12 h.

## Substrate Synthesis

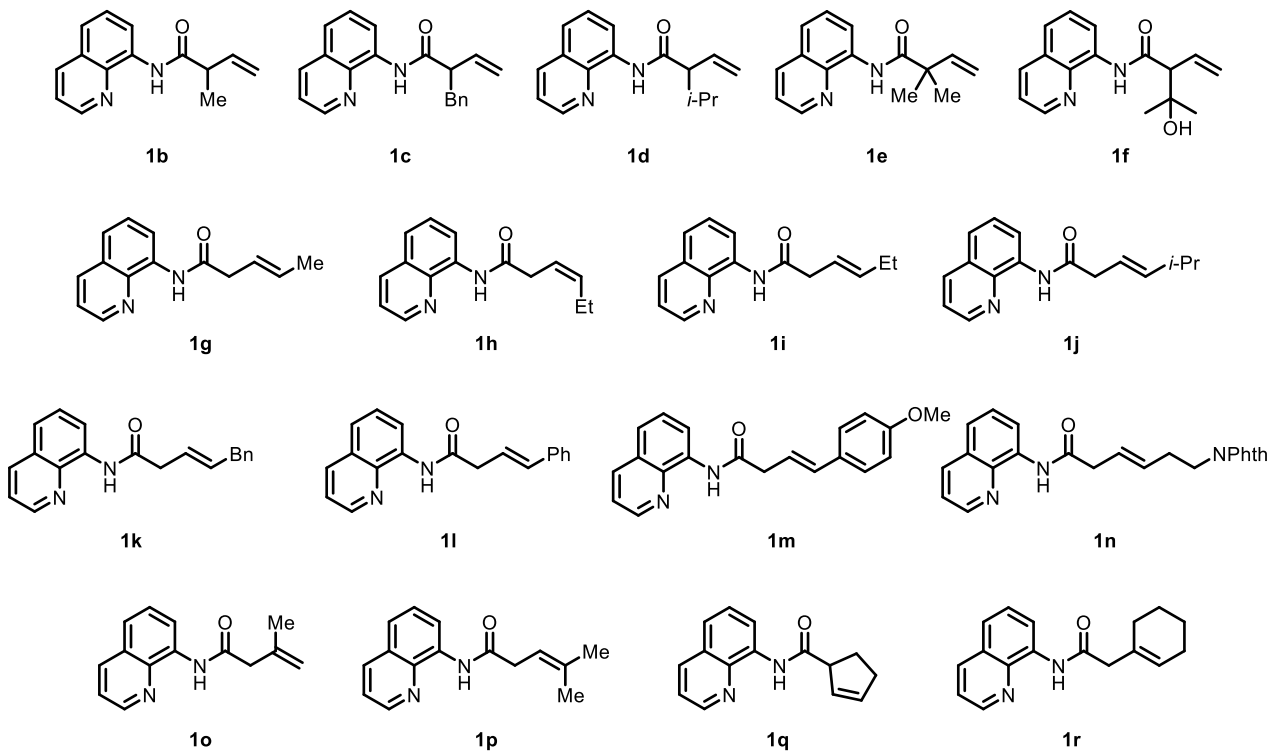

Alkenes **1b–1r** were synthesized as reported.<sup>1–6</sup>

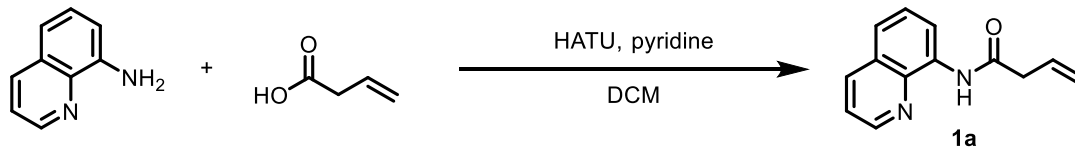

**N-(quinolin-8-yl)but-3-enamide (1a):** Alkene **1a** was synthesized following a previously published procedure from our laboratory, which is included here for convenience.<sup>2</sup> Vinyl acetic acid (3.3 mL, 39 mmol) was charged into a 250-mL round bottom flask containing DCM (90 mL). 8-Aminoquinoline (4.235 g, 30 mmol), pyridine (4.83 mL, 60 mmol), and HATU (19.01 g, 50 mmol) were added sequentially, and the reaction was stirred at ambient temperature for 16 h. The deep brown solution was diluted with EtOAc (300 mL), washed with sat. NaHCO<sub>3</sub> (100 mL, ×2) and brine (100 mL, ×1). The organic layer was then dried, concentrated under vacuum, and purified by column chromatography (10–15% EtOAc in hexanes) to afford 5.5 g (70%) yield of the desired product as a yellow oil. Large yellow crystals were obtained after the addition of a seed crystal under vacuum. This material was then ground into a fine powder before use.

## Screen of Different Sources of Phenylboronic Acid / Addition of Water

In the early stages of screening, upon switching to a freshly purchased bottle of phenylboronic acid, the yield unexpectedly dropped, prompting a systematic investigation of the role of phenylboronic acid supplier.

**Table S2.** Investigation of Different Phenylboronic Acid Suppliers<sup>a</sup>

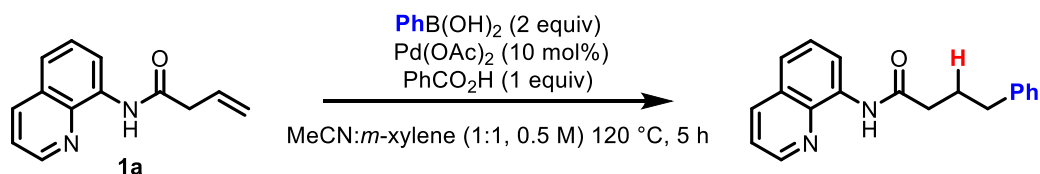

| Entry | Vendor        | physical appearance | % SM | % yield |
|-------|---------------|---------------------|------|---------|
| 1     | Aldrich       | medium-sized clumps | 6%   | 49%     |
| 2     | Oakwood       | fluffy white powder | 6%   | 10%     |
| 3     | Frontier      | large clumps        | 3%   | 53%     |
| 4     | Acros (Lot A) | white powder        | 4%   | 11%     |
| 5     | Acros (Lot B) | white powder        | 8%   | 10%     |
| 6     | Acros (Lot C) | white powder        | 25%  | 23%     |

<sup>a</sup> Reaction conditions: alkene **1a** (0.1 mmol),  $\text{Pd(OAc)}_2$  (10 mol%),  $\text{PhCO}_2\text{H}$  (1 equiv), phenylboronic acid (2 equiv), MeCN:*m*-xylene (1:1, 0.2 mL), 120 °C, 5 h. Yields based on  $^1\text{H}$  NMR analysis of the crude reaction mixture with dibromomethane as an internal standard.

Upon investigation of multiple sources of phenylboronic acid, the data suggested to us that the phenylboronic acid samples with a clumpy physical appearance generally provided better yields. Inspection of each batch by  $^1\text{H}$  NMR showed no significant difference in impurity profile. We then reasoned that precise stoichiometry of water might necessary for the reaction to function optimally. The boronic acids from Table S2, Entries 1 and 2, were then tested with varying amounts of water.

**Table S3.** Examination of Different Phenylboronic Acid Sources with Varying Amounts of Exogenous Water<sup>a</sup>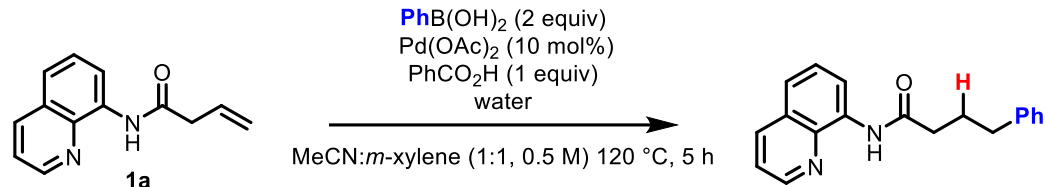

| Entry | Vendor (appearance) | water     | % SM | % yield |
|-------|---------------------|-----------|------|---------|
| 1     | Oakwood (powder)    | 2.5 equiv | <2%  | 48%     |
| 2     | Oakwood (powder)    | 5 equiv   | <2%  | 44%     |
| 3     | Oakwood (powder)    | 10 equiv  | <2%  | 40%     |
| 4     | Aldrich (clumps)    | 2.5 equiv | 2%   | 54%     |
| 5     | Aldrich (clumps)    | 5 equiv   | <1%  | 48%     |
| 6     | Aldrich (clumps)    | 10 equiv  | 5%   | 30%     |

<sup>a</sup> Reaction conditions: alkene **1a** (0.1 mmol),  $\text{Pd(OAc)}_2$  (10 mol%),  $\text{PhCO}_2\text{H}$  (1 equiv), phenylboronic acid (2 equiv), MeCN:*m*-xylene (1:1, 0.2 mL), 120 °C, 5 h. Yields based on <sup>1</sup>H NMR analysis of the crude reaction mixture with dibromomethane as an internal standard.

Upon addition of water, the discrepancy in yield between the two sources of phenylboronic acid was resolved (Entry 1, 4). However, as more water was added, the yield decreased, and formation of reduced alkene was observed (Entry 3, 6).

In light of these observations, we hypothesized that since each individual batch of boronic acid would likely contain varying amounts of water, different quantities of exogenous water would need to be added to achieve optimal water content in the reaction mixture. We then screened 0 equiv, 1.5 equiv, and 2.5 equiv of water respectively with different boronic acids. Here we present representative results for several arylboronic acids to illustrate how different amounts of added water affect the yield.

**Table S4.** Screen of Different Boronic Acids with Different Amounts of Water<sup>a</sup>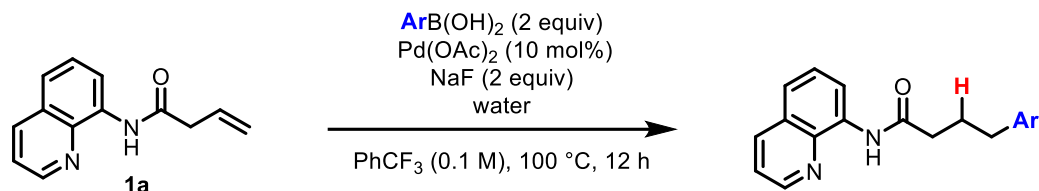

| Entry | Ar =                      | water     | % SM | % yield |
|-------|---------------------------|-----------|------|---------|
| 1     | 4-iodophenyl              | 0 equiv   | 77%  | 20%     |
| 2     | 4-iodophenyl              | 1.5 equiv | 67%  | 24%     |
| 3     | 4-iodophenyl              | 2.5 equiv | 37%  | 39%     |
| 4     | 3-formylphenyl            | 0 equiv   | 29%  | 50%     |
| 5     | 3-formylphenyl            | 1.5 equiv | 54%  | 39%     |
| 6     | 3-formylphenyl            | 2.5 equiv | 54%  | 26%     |
| 7     | 4-chlorophenyl (Source A) | 0 equiv   | 95%  | 5%      |
| 8     | 4-chlorophenyl (Source A) | 1.5 equiv | 85%  | 12%     |
| 9     | 4-chlorophenyl (Source A) | 2.5 equiv | 53%  | 30%     |
| 10    | 4-chlorophenyl (Source B) | 0 equiv   | 42%  | 46%     |
| 11    | 4-chlorophenyl (Source B) | 1.5 equiv | 7%   | 85%     |
| 12    | 4-chlorophenyl (Source B) | 2.5 equiv | 4%   | 85%     |

<sup>a</sup> Reaction conditions: alkene **1a** (0.1 mmol), Pd(OAc)<sub>2</sub> (10 mol%), NaF (2 equiv), arylboronic acid (2 equiv), PhCF<sub>3</sub> (1 mL), 100 °C, 12 h. Yields based on <sup>1</sup>H NMR analysis of the crude reaction mixture with dibromomethane as an internal standard.

As can be seen from Entries 1–6, for 4-iodophenylboronic acid 2.5 equiv additional water is required, while for 3-formylphenylboronic acid any additional water decreases yield. We also attempted the reaction using two different batches of 4-chlorophenylboronic acid. As can be seen from Entries 7–12, both batches gave higher yield as more water is added, but Source A seems to require even more water than 2.5 equiv for optimal performance, while Source B gives high yield at 1.5–2.5 equiv water.

## Screen of Hydroarylation for Polar Boronic Acids

**Table S5.** Investigation of Solvents for Polar Boronic Acids<sup>a</sup>

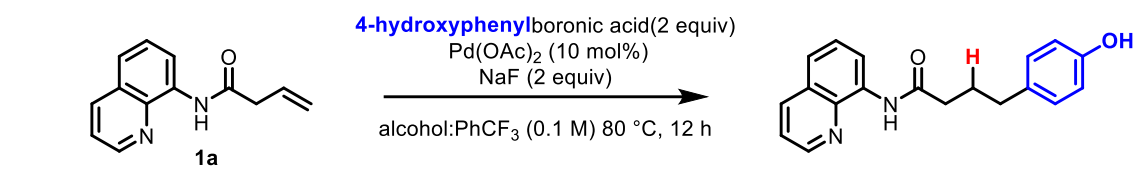

| Entry | Alcohol                     | % SM | % yield |
|-------|-----------------------------|------|---------|
| 1     | 20% ethanol                 | 85%  | trace   |
| 2     | 10% <i>t</i> -butyl alcohol | 55%  | 27%     |
| 3     | 20% <i>t</i> -butyl alcohol | 24%  | 72%     |
| 4     | 33% <i>t</i> -butyl alcohol | 29%  | 55%     |
| 5     | 50% <i>t</i> -butyl alcohol | 43%  | 26%     |
| 6     | 10% <i>t</i> -amyl alcohol  | 51%  | 18%     |
| 7     | 20% <i>t</i> -amyl alcohol  | 24%  | 55%     |
| 8     | 33% <i>t</i> -amyl alcohol  | 22%  | 37%     |
| 9     | 50% <i>t</i> -amyl alcohol  | 29%  | 32%     |

<sup>a</sup> Reaction conditions: alkene **1a** (0.1 mmol), Pd(OAc)<sub>2</sub> (10 mol%), NaF (2 equiv), 4-hydroxyphenylboronic acid (2 equiv), alcohol:PhCF<sub>3</sub> (1 mL), 80 °C, 12 h. Yields based on <sup>1</sup>H NMR analysis of the crude reaction mixture with dibromomethane as an internal standard.



## Examination of Alternative of Organoboron Coupling Partners

**Table S6.** Assessment of Different Organoboron Coupling Partners<sup>a</sup>

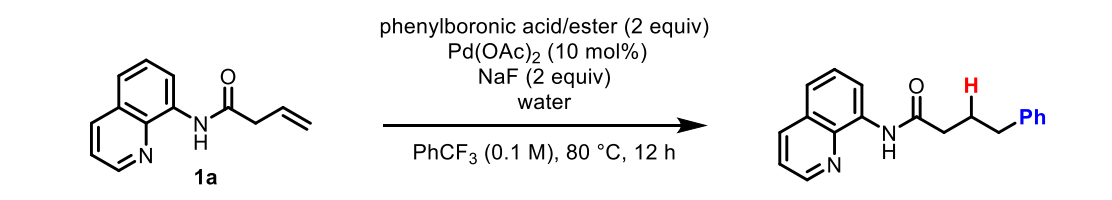

| Entry | Boron Source                      | GC analysis                             |
|-------|-----------------------------------|-----------------------------------------|
| 1     | PhB(pin)                          | only SM and unreacted PhB(pin) observed |
| 2     | PhB(MIDA)                         | only SM observed                        |
| 3     | PhBF <sub>3</sub> ·K <sup>+</sup> | only SM observed                        |
| 4     | PhB(npg)                          | only SM and unreacted PhB(npg) observed |
| 5     | PhB(OH) <sub>2</sub>              | product observed                        |
| 6     | triphenylboroxine                 | product observed, 82% isolated          |

<sup>a</sup> Reaction conditions: alkene **1a** (0.1 mmol), Pd(OAc)<sub>2</sub> (10 mol%), NaF (2 equiv), phenylboronic acid/ester (2 equiv), PhCF<sub>3</sub> (1 mL), 80 °C, 12 h. Yields based on GC analysis of the crude reaction mixture. npg = neopentyl glycol

## General Procedures for Evaluating Boronic Acid Scope

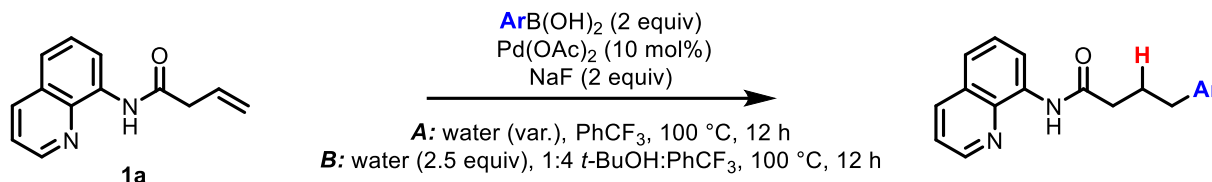

Unless otherwise stated, procedures for evaluating the boronic acid scope were as follows. General Procedure B was mostly used for boronic acids containing polar functional groups that did not dissolve well in benzonitrile.

**General Procedure A:** To a 1-dram (4 mL) vial equipped with a magnetic stir bar were added  $\text{Pd(OAc)}_2$  (2.2 mg, 0.01 mmol), alkene (21.2 mg, 0.1 mmol), boronic acid (0.2 mmol), NaF (8.4 mg, 0.2 mmol), water, and benzonitrile (1 mL). As the reaction was found to give variable yields depending on the water content of the individual batch of boronic acid (see page S7), three test reactions were examined with 0 equiv (0  $\mu\text{L}$ ), 1.5 equiv (2.7  $\mu\text{L}$ ), and 2.5 equiv (4.5  $\mu\text{L}$ ) of water. If the reaction seemed to benefit from having more water, additional experiments were performed with even higher amounts of water (5 equiv, 10 equiv, etc.). The highest yielding examples are reported below. The vial was sealed with an unpunctured TFE septum-covered screw cap and placed in a heating block that was pre-heated to 100 °C. After 12 h, the reaction was brought to room temperature, filtered through a plug of silica gel, and washed with acetone to elute all organic materials. The filtrate was concentrated by vacuum, re-dissolved in acetone, and separated by preparative TLC.

**General Procedure B:** To a 1-dram (4 mL) vial equipped with a magnetic stir bar were added  $\text{Pd(OAc)}_2$  (2.2 mg, 0.01 mmol), alkene (21.2 mg, 0.1 mmol), boronic acid (0.2 mmol), NaF (8.4 mg, 0.2 mmol), water (4.5  $\mu\text{L}$ ), *t*-BuOH (0.2 mL), and benzonitrile (0.8 mL). The vial was sealed with an unpunctured TFE septum-covered screw cap and placed in a heating block that was pre-heated to 100 °C. After 12 h, the reaction was brought to room temperature, filtered through silica, and washed with acetone to elute all organic materials. The filtrate was concentrated by vacuum, re-dissolved in acetone, and separated by preparative TLC.

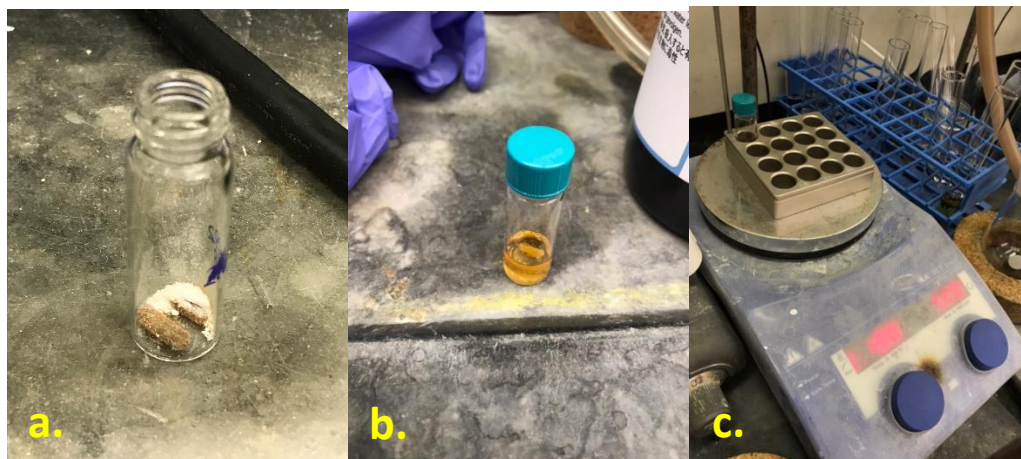

**Figure S1.** From left to right: a) addition of solids and stir bar to vial. b) addition of solvent and water. c) vial placed in heating block and stirred.

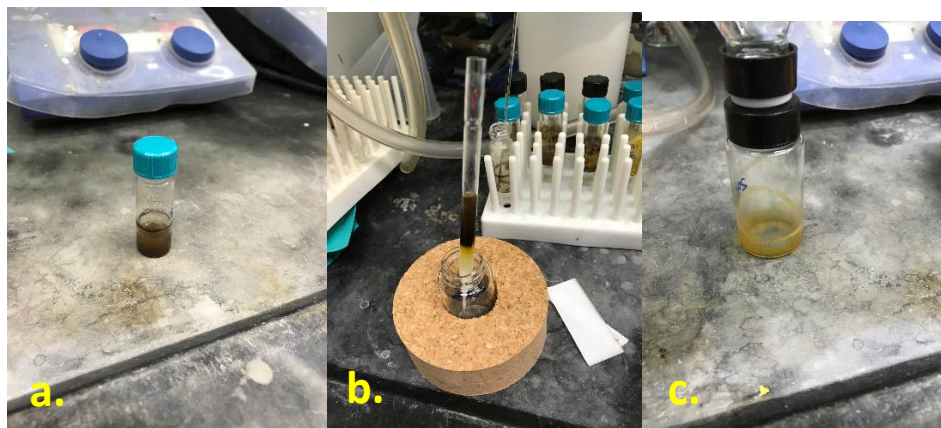

**Figure S2.** From left to right: a) reaction mixture after heating for 12 h. b) workup by filtering through silica plug. c) post-workup crude reaction mixture.

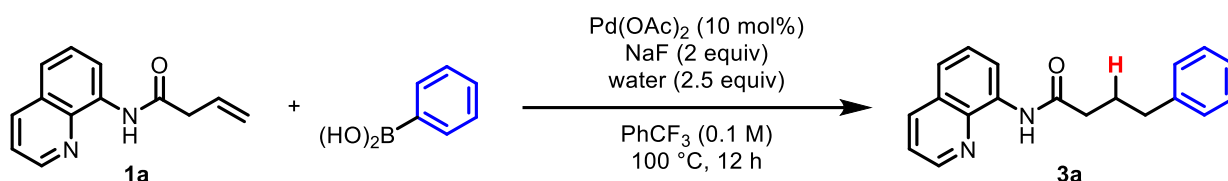

**4-phenyl-*N*-(quinolin-8-yl)butanamide (3a):** The reaction was carried out according to General Procedure A using phenylboronic acid (24.4 mg, 0.2 mmol) and water (4.5  $\mu\text{L}$ , 2.5 equiv). The product was purified by mass-directed prep LC. The crude material was purified on a Waters Autopurification LC with a Waters BEH C18 column (19 $\times$ 160 mm, 5 mm) using a 0.1% aqueous formic acid:acetonitrile gradient (30 mL/min, main segment of gradient at 55–75% acetonitrile over 8 min) at ambient temperature. Fractionation was triggered by a Waters QDa single quadrupole mass spec in ESI+ ( $m/z$  = 291.1 [M+H]<sup>+</sup>, cone voltage 15V). Purification afforded 24 mg (86%) of **3a** as an off-white solid. <sup>1</sup>H NMR (600 MHz, CDCl<sub>3</sub>)  $\delta$  9.79 (s, 1H), 8.85–8.76 (m, 2H), 8.16 (dd,  $J$  = 8.2, 1.7 Hz, 1H), 7.57–7.48 (m, 2H), 7.45 (dd,  $J$  = 8.2, 4.2 Hz, 1H), 7.32–7.27 (m, 2H), 7.26–7.23 (m, 2H), 7.22–7.18 (m, 1H), 2.77 (t,  $J$  = 7.6 Hz, 2H), 2.58 (t, 2H), 2.17 (p, 3H). <sup>13</sup>C NMR (150 MHz, CDCl<sub>3</sub>)  $\delta$  170.97, 147.64, 141.05, 137.88, 135.91, 134.05, 127.96, 127.49, 126.98, 125.51, 121.13, 120.93, 115.99, 36.86, 34.75, 26.59. HRMS calcd. for C<sub>19</sub>H<sub>19</sub>N<sub>2</sub>O<sup>+</sup> [M+H]<sup>+</sup>: 291.1492 Found: 291.1494.

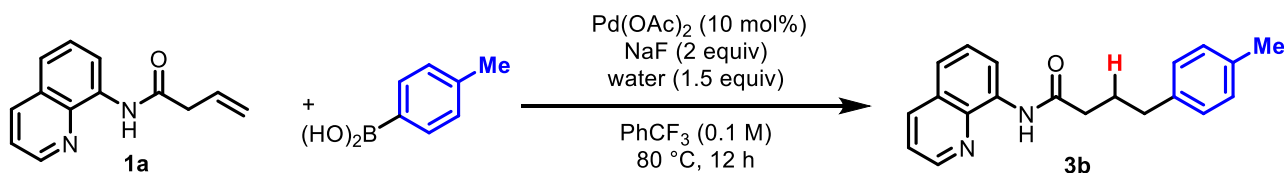

***N*-(quinolin-8-yl)-4-(*p*-tolyl)butanamide (3b):** The reaction was carried out according to General Procedure A at 80 °C using 4-methylphenylboronic acid (27.2 mg, 0.2 mmol) and water (2.7  $\mu\text{L}$ , 1.5 equiv). The product was purified by mass-directed prep LC. The crude material was purified on a Waters Autopurification LC with a Waters BEH C18 column (19 $\times$ 160 mm, 5 mm) using a 0.1% aqueous formic acid:acetonitrile gradient (30 mL/min, main segment of gradient at 65–95% acetonitrile over 8 min) at ambient temperature. Fractionation was triggered by a Waters QDa single quadrupole mass spec in ESI+ ( $m/z$  = 305.2 [M+H]<sup>+</sup>, cone voltage 15V). Purification afforded 30.4 mg (90%) of **3b** as an off-white solid. <sup>1</sup>H NMR (600 MHz, CDCl<sub>3</sub>)  $\delta$  9.78 (s, 1H), 8.82–8.77 (m, 2H), 8.16 (dd,  $J$  = 8.3, 1.7 Hz, 1H), 7.56–7.48 (m, 2H), 7.45 (dd,  $J$  = 8.2, 4.2 Hz, 1H), 7.15–7.09 (m, 4H), 2.73 (t,  $J$  = 7.5 Hz, 2H), 2.57 (t,  $J$  = 7.5 Hz, 2H), 2.32 (s, 3H), 2.14 (p,  $J$  = 7.5

Hz, 2H).  $^{13}\text{C NMR}$  (150 MHz,  $\text{CDCl}_3$ )  $\delta$  171.64, 148.23, 138.54, 138.48, 136.50, 135.56, 134.67, 129.23, 128.60, 128.08, 127.59, 121.71, 121.50, 116.58, 37.49, 34.91, 27.28, 21.15. **HRMS** calcd. for  $\text{C}_{20}\text{H}_{21}\text{N}_2\text{O}^+$   $[\text{M}+\text{H}]^+$ : 305.1648, Found: 305.1649.

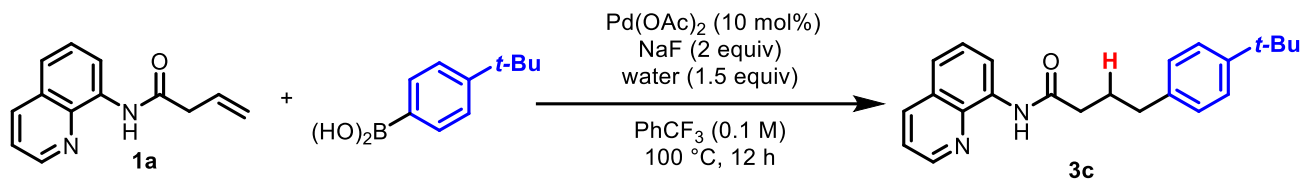

**4-(4-(*tert*-butyl)phenyl)-*N*-(quinolin-8-yl)butanamide (3c):** The reaction was carried out according to General Procedure A at 80 °C using 4-*tert*-butylphenylboronic acid (35.6 mg, 0.2 mmol) and water (2.7  $\mu\text{L}$ , 1.5 equiv). The product was purified by preparative TLC (1% EtOAc/toluene) to afford 24.6 mg (71%) of **3c** as a yellow solid.  $^1\text{H NMR}$  (600 MHz,  $\text{CDCl}_3$ )  $\delta$  9.79 (s, 1H), 8.82–8.76 (m, 2H), 8.16 (dd,  $J$  = 8.3, 1.7 Hz, 1H), 7.57–7.40 (m, 3H), 7.31 (d,  $J$  = 8.4 Hz, 2H), 7.18 (d,  $J$  = 8.2 Hz, 2H), 2.74 (t,  $J$  = 7.6 Hz, 2H), 2.58 (t,  $J$  = 7.5 Hz, 2H), 2.16 (p,  $J$  = 7.5 Hz, 2H), 1.31 (s, 9H).  $^{13}\text{C NMR}$  (150 MHz,  $\text{CDCl}_3$ )  $\delta$  171.67, 148.88, 148.19, 138.52, 136.56, 134.65, 128.36, 128.09, 127.61, 126.56, 125.42, 121.70, 121.50, 116.64, 37.59, 34.81, 34.50, 31.55, 27.13. **HRMS** calcd. for  $\text{C}_{23}\text{H}_{27}\text{N}_2\text{O}^+$   $[\text{M}+\text{H}]^+$ : 347.2218, Found: 347.2220.

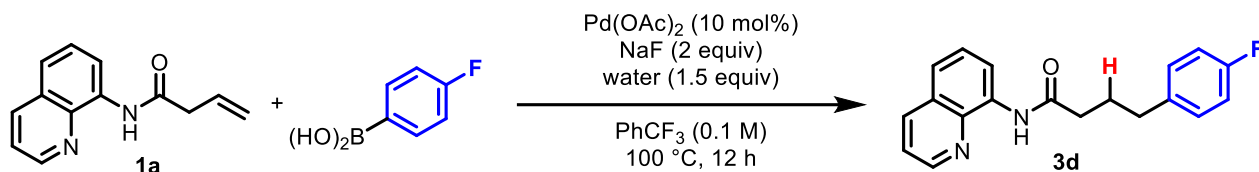

**4-(4-fluorophenyl)-*N*-(quinolin-8-yl)butanamide (3d):** The reaction was carried out according to General Procedure A using 4-fluorophenylboronic acid (28.0 mg, 0.2 mmol) and water (2.7  $\mu\text{L}$ , 1.5 equiv). The product was purified by preparative TLC (2% EtOAc/toluene) to afford 19 mg (62%) of **3d** as an orange solid.  $^1\text{H NMR}$  (600 MHz,  $\text{CDCl}_3$ )  $\delta$  9.78 (s, 1H), 8.79 (ddd,  $J$  = 9.0, 5.9, 1.6 Hz, 2H), 8.16 (dd,  $J$  = 8.3, 1.7 Hz, 1H), 7.57–7.49 (m, 2H), 7.45 (dd,  $J$  = 8.2, 4.2 Hz, 1H), 7.22–7.15 (m, 2H), 7.01–6.92 (m, 2H), 2.74 (t,  $J$  = 7.6 Hz, 2H), 2.57 (t,  $J$  = 7.4 Hz, 2H), 2.13 (p,  $J$  = 7.5 Hz, 2H).  $^{13}\text{C NMR}$  (150 MHz,  $\text{CDCl}_3$ )  $\delta$  171.42, 161.51 (d,  $J$  = 243.1 Hz), 148.27, 138.47, 137.24 (d,  $J$  = 3.2 Hz), 136.55, 134.61, 130.03 (d,  $J$  = 8.0 Hz), 128.11, 127.60, 121.68 (d,  $J$  = 24.8 Hz), 116.61, 115.36, 115.22, 37.31, 34.50, 27.30.  $^{19}\text{F NMR}$  (376 MHz,  $\text{CDCl}_3$ )  $\delta$  -117.83. **HRMS** calcd. for  $\text{C}_{19}\text{H}_{18}\text{FN}_2\text{O}^+$   $[\text{M}+\text{H}]^+$ : 309.1398, Found: 309.1396.

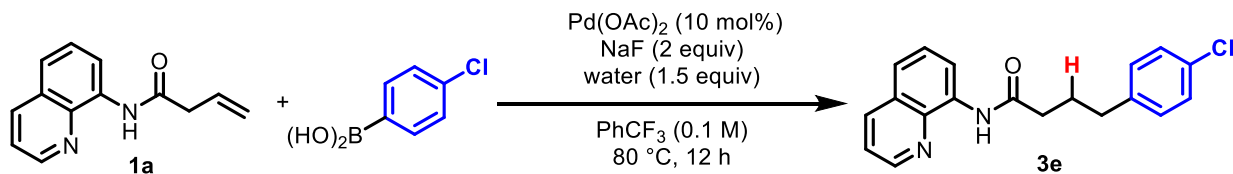

**4-(4-chlorophenyl)-*N*-(quinolin-8-yl)butanamide (3e):** The reaction was carried out according to General Procedure A at 80 °C using 4-chlorophenylboronic acid (31.3 mg, 0.2 mmol) and water (2.7  $\mu\text{L}$ , 1.5 equiv). The product was purified by preparative TLC (1% EtOAc/toluene) to afford 30 mg (92%) of **3e** as a white solid.  $^1\text{H NMR}$  (600 MHz,  $\text{CDCl}_3$ )  $\delta$  9.78 (s, 1H), 8.83–8.75 (m, 2H), 8.16 (dd,  $J$  = 8.2, 1.6 Hz, 1H), 7.57–7.48 (m, 2H), 7.46 (dd,  $J$  = 8.3, 4.2 Hz, 1H), 7.26 (dd,  $J$  = 6.3, 2.1 Hz, 2H), 7.20–7.15 (m, 2H), 2.74 (t,  $J$  = 7.6 Hz, 2H), 2.57 (t,  $J$  = 7.4 Hz, 2H), 2.13 (p,  $J$  = 7.5 Hz, 2H).  $^{13}\text{C NMR}$  (150 MHz,  $\text{CDCl}_3$ )  $\delta$  171.32, 148.27, 140.07, 138.45, 136.54,

134.57, 131.85, 130.05, 128.65, 128.09, 127.58, 121.75, 121.61, 116.60, 37.24, 34.64, 27.05. **HRMS** calcd. for  $C_{19}H_{18}ClN_2O^+$   $[M+H]^+$ : 325.1102, Found: 325.1103.

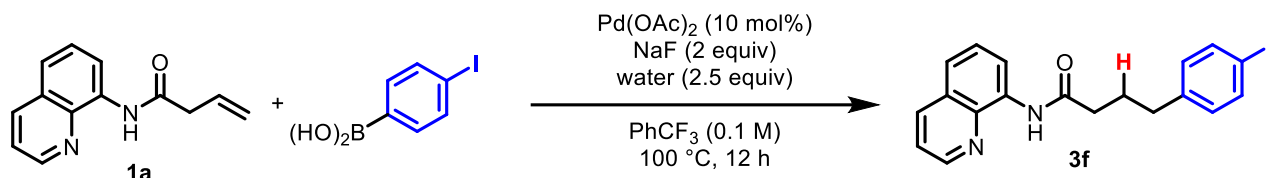

**4-(4-iodophenyl)-*N*-(quinolin-8-yl)butanamide (3f)**: The reaction was carried out according to General Procedure A using 4-iodophenylboronic acid (49.6 mg, 0.2 mmol) and water (4.5  $\mu$ L, 2.5 equiv). The product was purified by preparative TLC (1% EtOAc/toluene) to afford 14 mg (34%) of **3f** as a white solid.  **$^1H$  NMR** (600 MHz,  $CDCl_3$ )  $\delta$  9.77 (s, 1H), 8.92–8.71 (m, 2H), 8.16 (dd,  $J$  = 8.2, 1.8 Hz, 1H), 7.64–7.58 (m, 2H), 7.56–7.49 (m, 2H), 7.46 (dd,  $J$  = 8.3, 4.3 Hz, 1H), 7.00 (d,  $J$  = 8.0 Hz, 2H).  **$^{13}C$  NMR** (150 MHz,  $CDCl_3$ )  $\delta$  171.16, 148.13, 141.13, 138.31, 137.45, 136.40, 134.42, 130.70, 127.95, 127.44, 121.62, 121.47, 116.45, 91.05, 37.08, 34.64, 26.78. **HRMS** calcd. for  $C_{19}H_{18}IN_2O^+$   $[M+H]^+$ : 417.0464, Found: 417.0463.

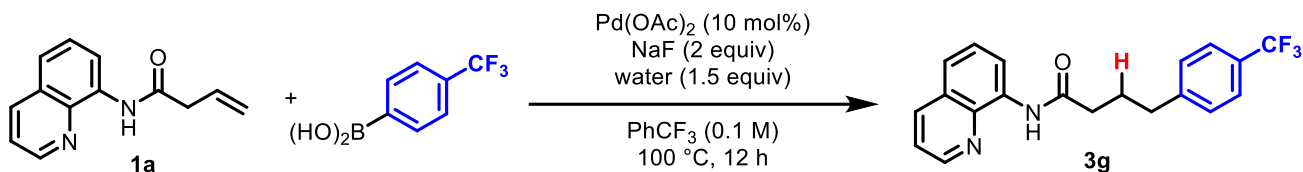

**4-(4-(trifluoromethyl)phenyl)-*N*-(quinolin-8-yl)butanamide (3g)**: The reaction was carried out according to General Procedure A using 4-(trifluoromethyl)phenylboronic acid (38.0 mg, 0.2 mmol) and water (2.7  $\mu$ L, 1.5 equiv). The product was purified by preparative TLC (20% EtOAc/hexane) to afford 28 mg (78%) of **3g** as an off-white solid.  **$^1H$  NMR** (600 MHz,  $CDCl_3$ )  $\delta$  9.79 (s, 1H), 8.84–8.67 (m, 2H), 8.16 (dd,  $J$  = 8.3, 1.7 Hz, 1H), 7.57–7.49 (m, 4H), 7.46 (dd,  $J$  = 8.3, 4.2 Hz, 1H), 7.35 (d,  $J$  = 7.9 Hz, 2H), 2.83 (t,  $J$  = 7.6 Hz, 2H), 2.58 (t,  $J$  = 7.3 Hz, 2H), 2.17 (dq,  $J$  = 8.9, 7.4 Hz, 2H).  **$^{13}C$  NMR** (150 MHz,  $CDCl_3$ )  $\delta$  170.56, 147.68, 145.17, 137.84, 135.96, 133.93, 128.41, 127.92 (q,  $J$  = 32.4 Hz), 127.50, 126.97, 124.89 (q,  $J$  = 3.9 Hz), 123.88 (q,  $J$  = 271.8 Hz), 121.17, 121.06, 116.02, 36.60, 34.51, 26.23.  **$^{19}F$  NMR** (376 MHz,  $CDCl_3$ )  $\delta$  -62.53. **HRMS** calcd. for  $C_{20}H_{18}F_3N_2O^+$   $[M+H]^+$ : 359.1366, Found: 359.1365.

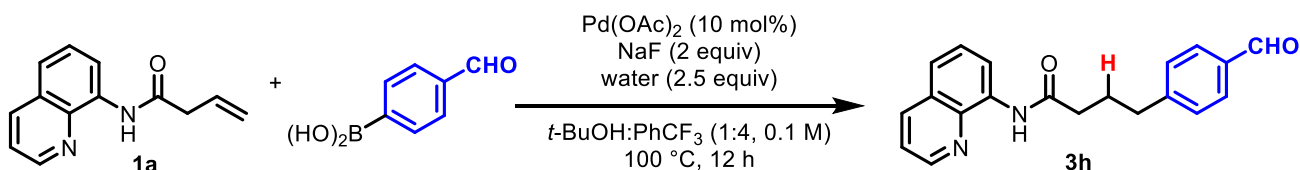

**4-(4-formylphenyl)-*N*-(quinolin-8-yl)butanamide (3h)**: The reaction was carried out according to General Procedure B using 4-formylphenylboronic acid (30.0 mg, 0.2 mmol). The product was purified by preparative TLC (3% EtOAc/toluene) to afford 11 mg (35%) of **3h** as a yellow oil.  **$^1H$  NMR** (600 MHz,  $CDCl_3$ )  $\delta$  9.97 (s, 1H), 9.79 (s, 1H), 8.83–8.74 (m, 2H), 8.21–8.12 (m, 1H), 7.84–7.79 (m, 2H), 7.58–7.48 (m, 2H), 7.49–7.43 (m, 1H), 7.43–7.38 (m, 2H), 2.91–2.80 (m, 2H), 2.60 (t,  $J$  = 7.3 Hz, 2H), 2.19 (p,  $J$  = 7.4 Hz, 2H).  **$^{13}C$  NMR** (150 MHz,  $CDCl_3$ )  $\delta$  192.09, 149.14, 148.28, 138.43, 136.56, 134.82, 134.51, 130.16, 129.39, 128.09, 127.56, 121.78, 121.67, 116.61, 37.22, 35.51, 26.73. **HRMS** calcd. for  $C_{20}H_{19}N_2O_2^+$   $[M+H]^+$ : 319.1441 Found: 319.1441.

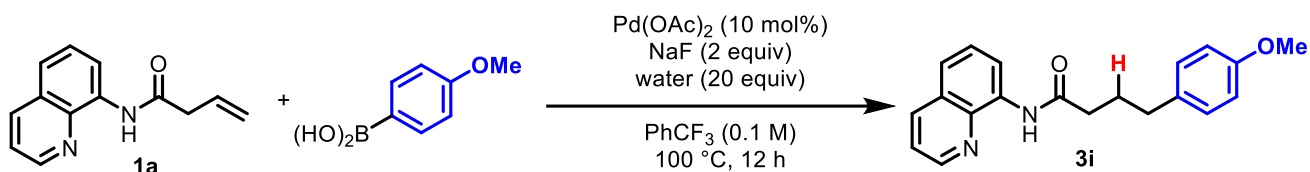

**4-(4-methoxyphenyl)-N-(quinolin-8-yl)butanamide (3i):** The reaction was carried out according to General Procedure A using 4-methoxyphenylboronic acid (30.4 mg, 0.2 mmol) and water (36  $\mu$ L, 20 equiv). The product was purified by preparative TLC (20% EtOAc/hexane) to afford 19 mg (59%) of **3i** as a yellow oil. **<sup>1</sup>H NMR** (600 MHz, CDCl<sub>3</sub>)  $\delta$  9.81 (s, 1H), 8.87–8.76 (m, 2H), 8.18 (dd,  $J$  = 8.3, 1.7 Hz, 1H), 7.59–7.50 (m, 2H), 7.48 (dd,  $J$  = 8.2, 4.2 Hz, 1H), 7.20–7.16 (m, 2H), 6.90–6.84 (m, 2H), 3.81 (s, 3H), 2.74 (t,  $J$  = 7.5 Hz, 2H), 2.59 (t,  $J$  = 7.4 Hz, 2H), 2.21–2.11 (m, 2H). **<sup>13</sup>C NMR** (150 MHz, CDCl<sub>3</sub>)  $\delta$  171.05, 157.42, 147.63, 137.88, 135.91, 134.06, 133.10, 129.01, 127.48, 126.98, 121.12, 120.91, 115.98, 113.37, 54.80, 36.84, 33.83, 26.82. **HRMS** calcd. for C<sub>20</sub>H<sub>21</sub>N<sub>2</sub>O<sub>2</sub><sup>+</sup> [M+H]<sup>+</sup>: 321.1598, Found: 321.1597.

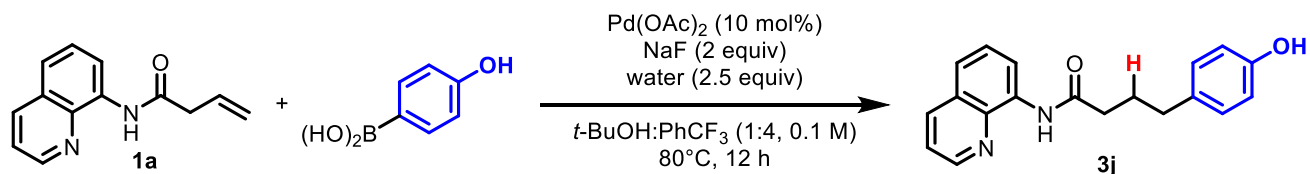

**4-(4-hydroxyphenyl)-N-(quinolin-8-yl)butanamide (3j):** The reaction was carried out according to General Procedure B using 4-hydroxyphenylboronic acid (27.6 mg, 0.2 mmol). The product was purified by preparative TLC (20% EtOAc/hexane) to afford 25 mg (82%) of **3j** as a yellow solid. **<sup>1</sup>H NMR** (600 MHz, CDCl<sub>3</sub>)  $\delta$  9.81 (s, 1H), 8.79 (ddd,  $J$  = 9.0, 5.9, 1.6 Hz, 2H), 8.17 (dd,  $J$  = 8.3, 1.7 Hz, 1H), 7.62–7.41 (m, 3H), 7.13–6.96 (m, 2H), 6.86–6.62 (m, 2H), 2.68 (t,  $J$  = 7.5 Hz, 2H), 2.57 (t,  $J$  = 7.5 Hz, 2H), 2.11 (p,  $J$  = 7.5 Hz, 2H). **<sup>13</sup>C NMR** (150 MHz, CDCl<sub>3</sub>)  $\delta$  171.90, 154.08, 148.16, 138.33, 136.48, 134.35, 133.32, 129.60, 127.98, 127.47, 121.62, 121.59, 116.68, 115.30, 37.32, 34.28, 27.31. **HRMS** calcd. for C<sub>19</sub>H<sub>19</sub>N<sub>2</sub>O<sub>2</sub><sup>+</sup> [M+H]<sup>+</sup>: 307.1441, Found: 307.1439. **X-ray** (single-crystal) Brown single crystals suitable for X-ray diffraction were obtained by slow evaporation of a saturated solution of **3j** in acetonitrile (CCDC 1835959).

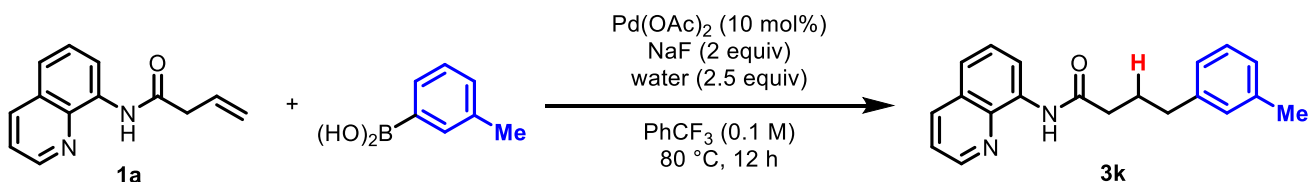

**N-(quinolin-8-yl)-4-(m-tolyl)butanamide (3k):** The reaction was carried out according to General Procedure A at 80 °C using 3-methylphenylboronic acid (27.2 mg, 0.2 mmol) and water (4.5  $\mu$ L, 2.5 equiv). The product was purified by mass-directed prep LC. The crude material was purified on a Waters Autopurification LC with a Waters BEH C18 column (19 $\times$ 160 mm, 5 mm) using a 0.1% aqueous formic acid:acetonitrile gradient (30 mL/min, main segment of gradient at 65–95% acetonitrile over 8 min) at ambient temperature. Fractionation was triggered by a Waters QDa single quadrupole mass spec in ESI+ ( $m/z$  = 305.2 [M+H], cone voltage 15V). Purification afforded 29 mg (95%) of **3k** as an off-white solid. **<sup>1</sup>H NMR** (600 MHz, CDCl<sub>3</sub>)  $\delta$  9.79 (s, 1H), 8.84–8.75 (m, 2H), 8.16 (dd,  $J$  = 8.2, 1.7 Hz, 1H), 7.56–7.48 (m, 2H), 7.45 (dd,  $J$  = 8.2, 4.2 Hz, 1H), 7.19 (t,  $J$  = 7.5 Hz, 1H), 7.08–7.00 (m, 3H), 2.73 (t,  $J$  = 7.6 Hz, 2H), 2.57 (t,  $J$  = 7.5 Hz, 2H), 2.33 (d,  $J$  = 0.8 Hz, 3H), 2.15 (p,  $J$  = 7.4 Hz, 2H). **<sup>13</sup>C NMR** (150 MHz, CDCl<sub>3</sub>)  $\delta$  171.04, 147.64, 140.98, 137.89, 137.51,

135.91, 134.07, 128.95, 127.85, 127.49, 126.99, 126.25, 125.13, 121.12, 120.92, 115.99, 36.89, 34.66, 26.60, 20.95. **HRMS** calcd. for  $C_{20}H_{21}N_2O^+$   $[M+H]^+$ : 305.1648, Found: 305.1649.

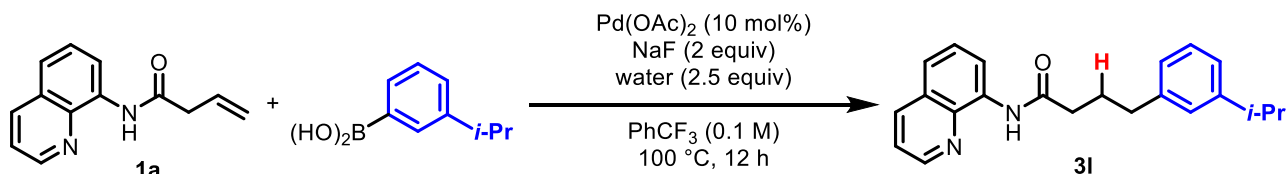

**4-(3-isopropylphenyl)-N-(quinolin-8-yl)butanamide (3I):** The reaction was carried out according to General Procedure A using 3-isopropylphenylboronic acid (32.8 mg, 0.2 mmol) and water (4.5  $\mu$ L, 2.5 equiv). The product was purified by preparative TLC (5% EtOAc/toluene) to afford 25 mg (76%) of **3I** as a yellow oil.  **$^1H$  NMR** (600 MHz,  $CDCl_3$ )  $\delta$  9.80 (s, 1H), 8.83–8.76 (m, 2H), 8.15 (dd,  $J$  = 8.2, 1.7 Hz, 1H), 7.54 (t,  $J$  = 7.9 Hz, 1H), 7.49 (dd,  $J$  = 8.3, 1.5 Hz, 1H), 7.44 (dd,  $J$  = 8.2, 4.2 Hz, 1H), 7.23 (dd,  $J$  = 15.1, 7.5 Hz, 1H), 7.11–7.04 (m, 3H), 2.88 (hept,  $J$  = 6.8 Hz, 1H), 2.79–2.72 (m, 2H), 2.59 (t,  $J$  = 7.5 Hz, 2H), 2.16 (p,  $J$  = 7.6 Hz, 2H), 1.24 (d,  $J$  = 6.9 Hz, 6H).  **$^{13}C$  NMR** (150 MHz,  $CDCl_3$ )  $\delta$  171.64, 149.15, 148.22, 141.59, 138.47, 136.50, 134.66, 128.48, 128.08, 127.58, 126.91, 126.12, 124.13, 121.71, 121.51, 116.58, 37.58, 35.45, 34.22, 27.27, 24.18. **HRMS** calcd. for  $C_{22}H_{25}N_2O^+$   $[M+H]^+$ : 333.1961 Found: 333.1960.

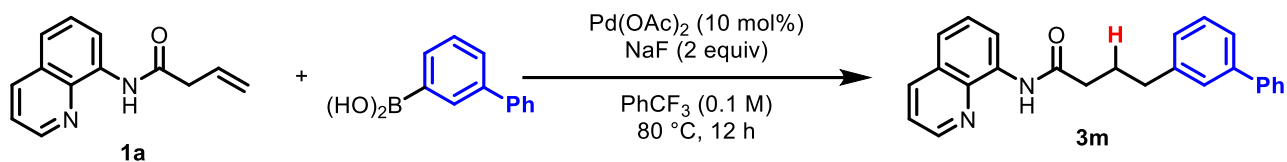

**4-([1,1'-biphenyl]-3-yl)-N-(quinolin-8-yl)butanamide (3m):** The reaction was carried out according to General Procedure A at 80 °C using 3-bisphenylboronic acid (39.6 mg, 0.2 mmol) and no water. The product was purified by preparative TLC (1% EtOAc/toluene) to afford 29 mg (79%) of **3m** as a white solid.  **$^1H$  NMR** (600 MHz,  $CDCl_3$ )  $\delta$  9.80 (s, 1H), 8.79 (d,  $J$  = 7.5 Hz, 1H), 8.76–8.71 (m, 1H), 8.15 (dt,  $J$  = 8.3, 1.3 Hz, 1H), 7.61–7.29 (m, 11H), 7.27–7.21 (m, 1H), 2.84 (t,  $J$  = 7.5 Hz, 2H), 2.61 (t,  $J$  = 7.4 Hz, 2H), 2.22 (p,  $J$  = 7.5 Hz, 2H).  **$^{13}C$  NMR** (150 MHz,  $CDCl_3$ )  $\delta$  171.53, 148.25, 142.12, 141.52, 141.39, 138.45, 136.48, 134.62, 128.98, 128.81, 128.07, 127.65, 127.62, 127.56, 127.33, 127.31, 125.03, 121.70, 121.54, 116.58, 37.43, 35.39, 27.20. **HRMS** calcd. for  $C_{25}H_{23}N_2O^+$   $[M+H]^+$ : 367.1805 Found: 367.1807.

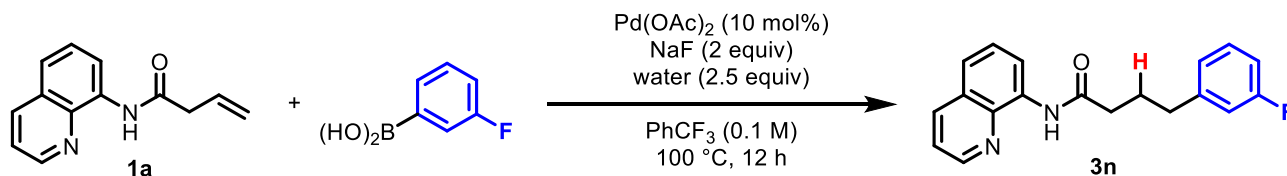

**4-(3-fluorophenyl)-N-(quinolin-8-yl)butanamide (3n):** The reaction was carried out according to General Procedure A using 3-fluorophenylboronic acid (28.0 mg, 0.2 mmol) and water (4.5  $\mu$ L, 2.5 equiv). The product was purified by preparative TLC (5% EtOAc/toluene) to afford 28 mg (91%) of **3n** as a yellow oil.  **$^1H$  NMR** (600 MHz,  $CDCl_3$ )  $\delta$  9.79 (s, 1H), 8.84–8.75 (m, 2H), 8.16 (dd,  $J$  = 8.2, 1.7 Hz, 1H), 7.57–7.48 (m, 2H), 7.45 (dd,  $J$  = 8.2, 4.2 Hz, 1H), 7.28–7.22 (m, 1H), 7.04–7.00 (m, 1H), 6.96 (dt,  $J$  = 10.0, 2.1 Hz, 1H), 6.92–6.86 (m, 1H), 2.76 (t,  $J$  = 7.6 Hz, 2H), 2.57 (t,  $J$  = 7.4 Hz, 2H), 2.15 (p,  $J$  = 7.5 Hz, 2H).  **$^{13}C$  NMR** (150 MHz,  $CDCl_3$ )  $\delta$  171.28, 163.08 (d,  $J$  = 245.4 Hz), 148.26, 144.21 (d,  $J$  = 7.2 Hz), 138.44, 136.50, 134.56, 129.93 (d,  $J$  = 8.3 Hz), 128.07, 127.54, 124.33 (d,  $J$  = 2.7 Hz), 121.73, 121.58, 116.58, 115.52 (d,  $J$  = 20.9 Hz), 112.99 (d,  $J$  = 21.0 Hz), 37.24, 35.00,

26.89.  $^{19}\text{F}$  NMR (376 MHz,  $\text{CDCl}_3$ )  $\delta$  -113.92. HRMS calcd. for  $\text{C}_{19}\text{H}_{18}\text{FN}_2\text{O}^+$   $[\text{M}+\text{H}]^+$ : 309.1398 Found: 309.1399.

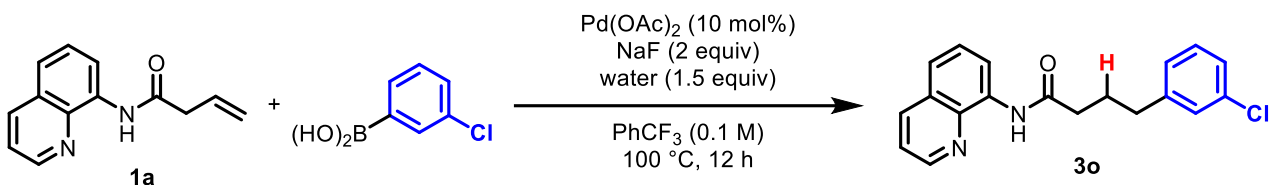

**4-(3-chlorophenyl)-N-(quinolin-8-yl)butanamide (3o)**: The reaction was carried out according to General Procedure A using 3-chlorophenylboronic acid (31.2 mg, 0.2 mmol) and water (2.7  $\mu\text{L}$ , 1.5 equiv). The product was purified by preparative TLC (1% EtOAc/toluene) to afford 27 mg (83%) of **3o** as a colorless oil.  $^1\text{H}$  NMR (600 MHz,  $\text{CDCl}_3$ )  $\delta$  9.80 (s, 1H), 8.86–8.74 (m, 2H), 8.16 (dd,  $J$  = 8.2, 1.7 Hz, 1H), 7.57–7.48 (m, 2H), 7.46 (dd,  $J$  = 8.2, 4.2 Hz, 1H), 7.28–7.15 (m, 3H), 7.12 (dt,  $J$  = 7.6, 1.5 Hz, 1H), 2.80–2.69 (m, 2H), 2.57 (t,  $J$  = 7.4 Hz, 2H), 2.15 (p,  $J$  = 7.5 Hz, 2H).  $^{13}\text{C}$  NMR (150 MHz,  $\text{CDCl}_3$ )  $\delta$  171.27, 148.29, 143.68, 138.45, 136.52, 134.54, 134.30, 129.80, 128.82, 128.07, 127.55, 126.89, 126.33, 121.74, 121.61, 116.60, 37.23, 34.95, 26.92. HRMS calcd. for  $\text{C}_{19}\text{H}_{18}\text{N}_2\text{O}^+$   $[\text{M}+\text{H}]^+$ : 325.1102 Found: 325.1102.

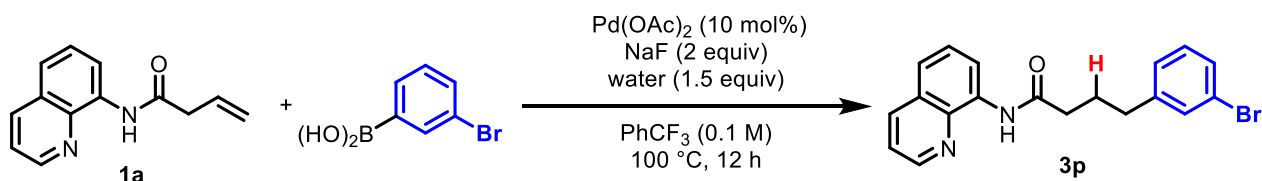

**4-(3-bromophenyl)-N-(quinolin-8-yl)butanamide (3p)**: The reaction was carried out according to General Procedure A using 3-bromophenylboronic acid (40.1 mg, 0.2 mmol) and water (2.7  $\mu\text{L}$ , 1.5 equiv). The product was purified by preparative TLC (1% EtOAc/toluene) to afford 27.3 mg (76%) of **3p** as a pale orange oil.  $^1\text{H}$  NMR (600 MHz,  $\text{CDCl}_3$ )  $\delta$  9.83 (s, 1H), 8.86–8.79 (m, 2H), 8.19 (dd,  $J$  = 8.3, 1.7 Hz, 1H), 7.59–7.52 (m, 2H), 7.48 (dd,  $J$  = 8.2, 4.2 Hz, 1H), 7.43 (d,  $J$  = 1.8 Hz, 1H), 7.36 (dt,  $J$  = 6.4, 2.2 Hz, 1H), 7.21–7.16 (m, 2H), 2.77 (t,  $J$  = 7.6 Hz, 2H), 2.60 (t,  $J$  = 7.4 Hz, 2H), 2.17 (p,  $J$  = 7.4 Hz, 2H).  $^{13}\text{C}$  NMR (151 MHz,  $\text{CDCl}_3$ )  $\delta$  171.24, 148.28, 144.01, 138.42, 136.54, 134.53, 131.73, 130.11, 129.26, 128.07, 127.56, 127.36, 122.62, 121.74, 121.61, 116.62, 37.23, 34.93, 26.94. HRMS calcd. for  $\text{C}_{19}\text{H}_{18}\text{BrN}_2\text{O}^+$   $[\text{M}+\text{H}]^+$ : 369.0597, Found: 369.0598.

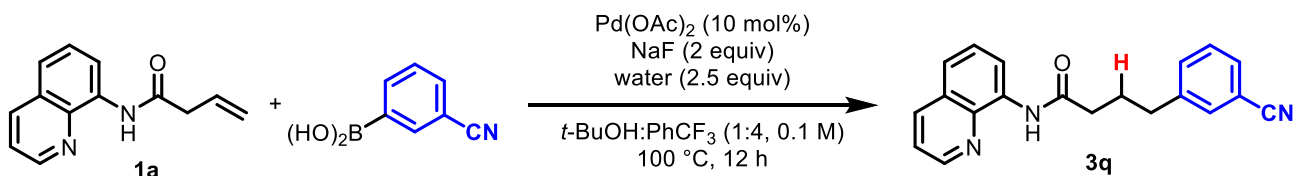

**4-(3-cyanophenyl)-N-(quinolin-8-yl)butanamide (3q)**: The reaction was carried out according to General Procedure B using 3-cyanophenylboronic acid (29.4 mg, 0.2 mmol). The product was purified by preparative TLC (3% MeCN/hexanes) to afford 21 mg (66%) of **3q** as an off-white solid.  $^1\text{H}$  NMR (600 MHz,  $\text{CDCl}_3$ )  $\delta$  9.81 (s, 1H), 8.83 (dd,  $J$  = 4.2, 1.7 Hz, 1H), 8.77 (dd,  $J$  = 7.3, 1.6 Hz, 1H), 8.18 (dd,  $J$  = 8.3, 1.7 Hz, 1H), 7.59–7.45 (m, 6H), 7.39 (t,  $J$  = 7.7 Hz, 1H), 2.84–2.77 (m, 2H), 2.59 (t,  $J$  = 7.3 Hz, 2H), 2.16 (p,  $J$  = 7.3 Hz, 2H).  $^{13}\text{C}$  NMR (150 MHz,  $\text{CDCl}_3$ )  $\delta$  171.03, 148.39, 143.07, 138.43, 136.58, 134.42, 133.28, 132.24, 130.03, 129.37, 128.10, 127.54, 121.76, 119.10, 116.65, 112.59, 37.08, 34.82, 26.83. HRMS calcd. for  $\text{C}_{20}\text{H}_{18}\text{N}_3\text{O}^+$   $[\text{M}+\text{H}]^+$ : 316.1444, Found: 316.1443.



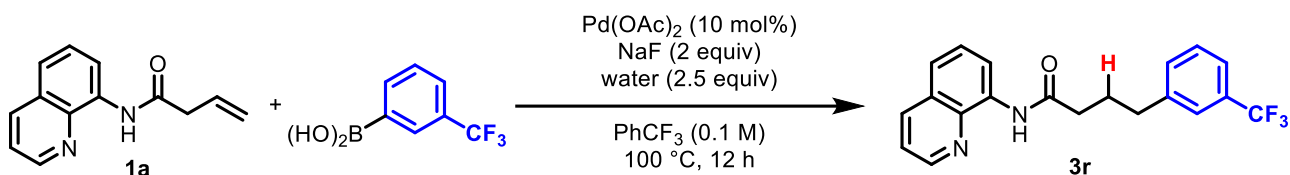

**N-(quinolin-8-yl)-4-(3-(trifluoromethyl)phenyl)butanamide (3r):** The reaction was carried out according to General Procedure A using 3-(trifluoromethyl)phenylboronic acid (38.0 mg, 0.2 mmol) and water (4.5  $\mu$ L, 2.5 equiv). The product was purified by preparative TLC (5% EtOAc/toluene) to afford 34 mg (95%) of **3r** as an off-white solid. **NMR** (600 MHz,  $\text{CDCl}_3$ )  $\delta$  9.81 (s, 1H), 8.79 (ddd,  $J$  = 8.9, 5.8, 1.6 Hz, 2H), 8.16 (dd,  $J$  = 8.2, 1.7 Hz, 1H), 7.58–7.37 (m, 7H), 2.85–2.81 (m, 2H), 2.60 (t,  $J$  = 7.3 Hz, 2H), 2.18 (p,  $J$  = 7.5 Hz, 2H).  **$^{13}\text{C}$  NMR** (150 MHz,  $\text{CDCl}_3$ )  $\delta$  171.15, 148.29, 142.57, 138.45, 136.53, 134.53, 132.09, 130.85 (q,  $J$  = 31.9 Hz), 128.97, 128.08, 127.55, 121.76, 125.34 (q,  $J$  = 3.8 Hz), 124.36 (q,  $J$  = 272.1 Hz), 123.05 (q,  $J$  = 3.9 Hz), 121.64, 116.60, 37.26, 35.12, 26.99.  **$^{19}\text{F}$  NMR** (376 MHz,  $\text{CDCl}_3$ )  $\delta$  -62.73. **HRMS** calcd. for  $\text{C}_{20}\text{H}_{18}\text{F}_3\text{N}_2\text{O}^+$   $[\text{M}+\text{H}]^+$ : 359.1366, Found: 359.1365.

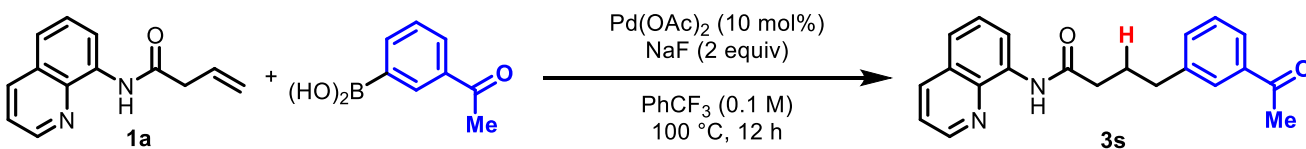

**4-(3-acetylphenyl)-N-(quinolin-8-yl)butanamide (3s):** The reaction was carried out according to General Procedure A using 3-acetylphenylboronic acid (32.8 mg, 0.2 mmol) and no water. The product was purified by preparative TLC (3% EtOAc/toluene) to afford 21 mg (63%) of **3s** as an orange oil.  **$^1\text{H}$  NMR** (600 MHz,  $\text{CDCl}_3$ )  $\delta$  9.80 (s, 1H), 8.91–8.65 (m, 2H), 8.17 (dd,  $J$  = 8.3, 1.7 Hz, 1H), 7.87–7.82 (m, 1H), 7.79 (dt,  $J$  = 7.7, 1.4 Hz, 1H), 7.58–7.49 (m, 2H), 7.48–7.42 (m, 2H), 7.39 (t,  $J$  = 7.6 Hz, 1H), 2.87–2.81 (m, 2H), 2.64–2.56 (m, 5H), 2.23–2.15 (m, 2H).  **$^{13}\text{C}$  NMR** (150 MHz,  $\text{CDCl}_3$ )  $\delta$  198.48, 171.32, 148.30, 142.19, 138.44, 137.46, 136.53, 134.53, 133.54, 128.82, 128.47, 128.08, 127.56, 126.35, 121.77, 121.64, 116.61, 37.33, 35.18, 27.07, 26.82. **HRMS** calcd. for  $\text{C}_{21}\text{H}_{21}\text{N}_2\text{O}_2^+$   $[\text{M}+\text{H}]^+$ : 333.1598, Found: 333.1597.

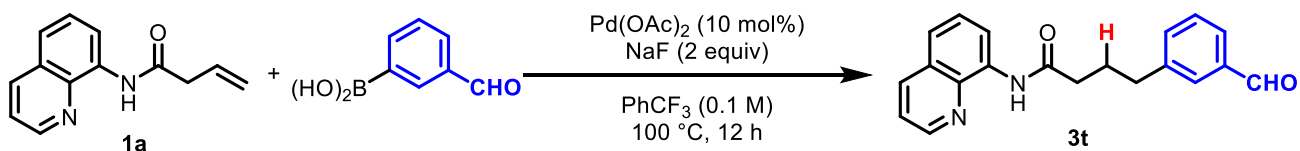

**4-(3-formylphenyl)-N-(quinolin-8-yl)butanamide (3t):** The reaction was carried out according to General Procedure A using 3-formylphenylboronic acid (30.0 mg, 0.2 mmol) and no water. The product was purified by preparative TLC (40% EtOAc/hexane) to afford 24 mg (75%) of **3t** as an off-white solid.  **$^1\text{H}$  NMR** (600 MHz,  $\text{CDCl}_3$ )  $\delta$  10.01 (s, 1H), 9.82 (s, 1H), 8.84–8.77 (m, 2H), 8.19 (dd,  $J$  = 8.3, 1.7 Hz, 1H), 7.79 (q,  $J$  = 2.1 Hz, 1H), 7.74 (dt,  $J$  = 7.5, 1.5 Hz, 1H), 7.59–7.52 (m, 3H), 7.51–7.47 (m, 2H), 2.89 (t, 2H), 2.62 (t,  $J$  = 7.3 Hz, 2H), 2.26–2.18 (m, 2H).  **$^{13}\text{C}$  NMR** (150 MHz,  $\text{CDCl}_3$ )  $\delta$  192.63, 171.18, 148.31, 142.76, 138.44, 136.77, 136.55, 134.95, 134.52, 129.81, 129.27, 128.09, 127.83, 127.56, 121.77, 121.65, 116.61, 37.24, 34.99, 26.96. **HRMS** calcd. for  $\text{C}_{20}\text{H}_{19}\text{N}_2\text{O}_2^+$   $[\text{M}+\text{H}]^+$ : 319.1441, Found: 319.1443.

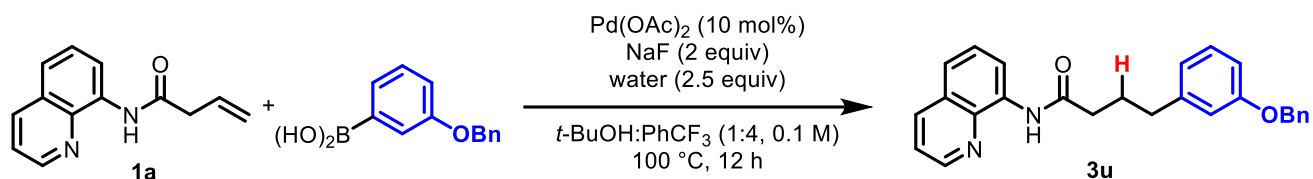

**4-(3-(benzyloxy)phenyl)-N-(quinolin-8-yl)butanamide (3u):** The reaction was carried out according to General Procedure A using 3-benzyloxyphenylboronic acid (45.6 mg, 0.2 mmol) and water (2.7  $\mu\text{L}$ , 1.5 equiv). The product was purified by preparative TLC (3% EtOAc/toluene) to afford 38 mg (96% yield) of **3u** as a pale-yellow oil.  $^1\text{H NMR}$  (600 MHz,  $\text{CDCl}_3$ )  $\delta$  9.78 (s, 1H), 8.79 (ddt,  $J = 6.0, 4.3, 2.7$  Hz, 2H), 8.15 (dd,  $J = 8.2, 1.8$  Hz, 1H), 7.62–7.47 (m, 2H), 7.47–7.35 (m, 5H), 7.35–7.18 (m, 2H), 6.95–6.79 (m, 3H), 5.04 (d,  $J = 2.3$  Hz, 2H), 2.75 (td,  $J = 7.4, 2.3$  Hz, 2H), 2.56 (td,  $J = 7.5, 2.3$  Hz, 2H), 2.16 (dq,  $J = 9.3, 7.3$  Hz, 2H).  $^{13}\text{C NMR}$  (150 MHz,  $\text{CDCl}_3$ )  $\delta$  171.55, 159.07, 148.26, 143.30, 138.46, 137.25, 136.49, 134.64, 129.55, 128.68, 128.08, 128.03, 127.65, 127.57, 121.72, 121.53, 121.42, 116.58, 115.38, 112.43, 70.04, 37.35, 35.33, 27.00. **HRMS** calcd. for  $\text{C}_{26}\text{H}_{25}\text{N}_2\text{O}_2$   $[\text{M}+\text{H}]^+$ : 397.1911, Found: 397.1911.

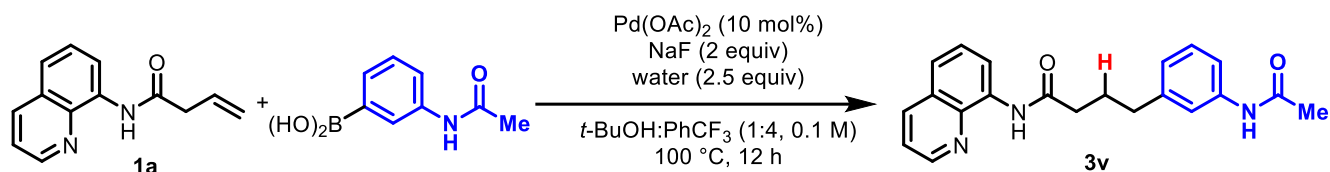

**4-(3-(acetamidophenyl)-N-(quinolin-8-yl)butanamide (3v):** The reaction was carried out according to General Procedure B using 3-acetamidophenylboronic acid (35.8 mg, 0.2 mmol). The product was purified by preparative TLC (20% EtOAc/hexanes) to afford 26 mg (75% yield) of **3v** as a yellow oil.  $^1\text{H NMR}$  (600 MHz,  $\text{CDCl}_3$ )  $\delta$  9.79 (s, 1H), 8.96–8.55 (m, 2H), 8.15 (dd,  $J = 8.2, 1.7$  Hz, 1H), 7.57–7.37 (m, 5H), 7.31 (s, 1H), 7.23 (t,  $J = 7.8$  Hz, 1H), 6.97 (d,  $J = 7.6$  Hz, 1H), 2.72 (t,  $J = 7.5$  Hz, 2H), 2.55 (t,  $J = 7.5$  Hz, 2H), 2.18–2.10 (m, 5H).  $^{13}\text{C NMR}$  (150 MHz,  $\text{CDCl}_3$ )  $\delta$  171.50, 168.44, 148.16, 142.40, 138.32, 138.05, 136.40, 134.43, 129.05, 127.95, 127.41, 124.55, 121.63, 121.51, 119.91, 117.68, 116.48, 37.22, 35.06, 26.87, 24.61. **HRMS** calcd. for  $\text{C}_{21}\text{H}_{22}\text{N}_3\text{O}_2$   $[\text{M}+\text{H}]^+$ : 348.1707, Found: 348.1707.

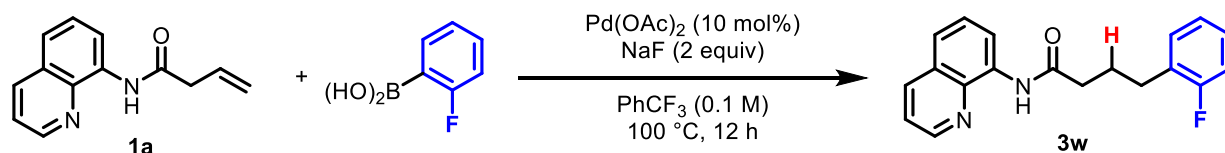

**4-(2-(2-fluorophenyl)-N-(quinolin-8-yl)butanamide (3w):** The reaction was carried out according to General Procedure A using 2-fluorophenylboronic acid (28.0 mg, 0.2 mmol) and no water. The product was purified by preparative TLC (2% EtOAc/toluene) to afford 13 mg (42%) of **3w** as a yellow oil.  $^1\text{H NMR}$  (600 MHz,  $\text{CDCl}_3$ )  $\delta$  9.80 (s, 1H), 8.85–8.75 (m, 2H), 8.16 (dd,  $J = 8.2, 1.7$  Hz, 1H), 7.57–7.43 (m, 3H), 7.32–7.22 (m, 1H), 7.18 (tdd,  $J = 7.4, 5.2, 1.8$  Hz, 1H), 7.12–6.95 (m, 2H), 2.81 (t,  $J = 7.6$  Hz, 2H), 2.60 (t,  $J = 7.5$  Hz, 2H), 2.16 (p,  $J = 7.6$  Hz, 2H).  $^{13}\text{C NMR}$  (150 MHz,  $\text{CDCl}_3$ )  $\delta$  170.80, 160.74 (d,  $J = 244.8$  Hz), 147.65, 137.88, 135.91, 134.04, 130.37 (d,  $J = 5.0$  Hz), 127.48, 127.84 (d,  $J = 15.9$  Hz), 127.27 (d,  $J = 8.2$  Hz), 126.97, 123.55 (d,  $J = 3.5$  Hz), 121.12, 120.94, 116.01, 114.80 (d,  $J = 22.3$  Hz), 36.85, 27.94, 25.33.  $^{19}\text{F NMR}$  (376 MHz,  $\text{CDCl}_3$ )  $\delta$  -118.85. **HRMS** calcd. for  $\text{C}_{19}\text{H}_{18}\text{FN}_2\text{O}$   $[\text{M}+\text{H}]^+$ : 309.1398, Found: 309.1397.

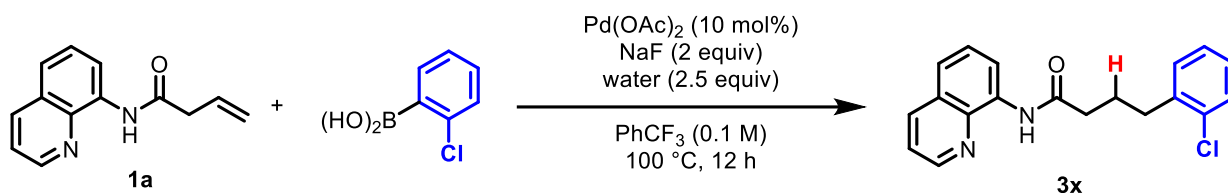

**4-(2-chlorophenyl)-N-(quinolin-8-yl)butanamide (3x):** The reaction was carried out according to General Procedure A using 2-chlorophenylboronic acid (31.3 mg, 0.2 mmol) and water (4.5  $\mu$ L, 2.5 equiv). The product was purified by mass-directed prep LC. The crude material was purified on a Waters Autopurification LC with a Waters BEH C18 column (19 $\times$ 160 mm, 5 mm) using a 0.1% aqueous formic acid:acetonitrile gradient (30 mL/min, main segment of gradient at 65–95% acetonitrile over 8 min) at ambient temperature. Fractionation was triggered by a Waters QDa single quadrupole mass spec in ESI+ ( $m/z$  = 325.1 [M+H]<sup>+</sup>, cone voltage 15V). Purification afforded 4 mg (12%) of **3x** as a colorless oil. <sup>1</sup>H NMR (600 MHz, CDCl<sub>3</sub>)  $\delta$  9.81 (s, 1H), 8.92–8.60 (m, 2H), 8.17 (dd,  $J$  = 8.3, 1.7 Hz, 1H), 7.57–7.49 (m, 2H), 7.46 (dd,  $J$  = 8.3, 4.2 Hz, 1H), 7.35 (dd,  $J$  = 7.9, 1.4 Hz, 1H), 7.29 (dd,  $J$  = 7.5, 1.7 Hz, 1H), 7.20 (td,  $J$  = 7.4, 1.4 Hz, 1H), 7.15 (td,  $J$  = 7.6, 1.8 Hz, 1H), 2.90 (t,  $J$  = 7.7 Hz, 2H), 2.63 (t,  $J$  = 7.5 Hz, 2H), 2.17 (p,  $J$  = 7.6 Hz, 2H). <sup>13</sup>C NMR (150 MHz, CDCl<sub>3</sub>)  $\delta$  171.28, 148.13, 139.13, 138.35, 136.40, 134.50, 134.04, 130.61, 129.54, 127.96, 127.49, 127.46, 126.82, 121.60, 121.42, 116.49, 37.35, 32.88, 25.40. HRMS calcd. for C<sub>19</sub>H<sub>18</sub>ClN<sub>2</sub>O<sup>+</sup> [M+H]<sup>+</sup>: 325.1108, Found: 325.1110.

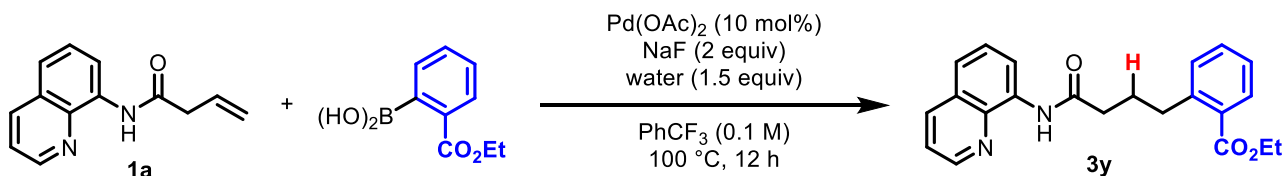

**ethyl 2-(4-oxo-4-(quinolin-8-ylamino)butyl)benzoate (3y):** The reaction was carried out according to General Procedure A using 2-ethoxycarbonylphenylboronic acid (38.8 mg, 0.2 mmol) and water (2.7  $\mu$ L, 1.5 equiv). The product was purified by preparative TLC (40% EtOAc/hexane) to afford 14 mg (39%) of **3y** as a pale yellow oil. <sup>1</sup>H NMR (600 MHz, CDCl<sub>3</sub>)  $\delta$  9.81 (s, 1H), 8.82–8.75 (m, 2H), 8.16 (dd,  $J$  = 8.2, 1.7 Hz, 1H), 7.89 (dd,  $J$  = 7.8, 1.5 Hz, 1H), 7.56–7.51 (m, 1H), 7.50 (dd,  $J$  = 8.3, 1.5 Hz, 1H), 7.47–7.41 (m, 2H), 7.33 (dd,  $J$  = 7.7, 1.3 Hz, 1H), 4.36 (q,  $J$  = 7.1 Hz, 2H), 3.15–3.07 (m, 2H), 2.63 (dd,  $J$  = 8.0, 7.1 Hz, 2H), 2.22–2.10 (m, 2H), 1.39 (t,  $J$  = 7.1 Hz, 3H). <sup>13</sup>C NMR (150 MHz, CDCl<sub>3</sub>)  $\delta$  171.62, 167.82, 148.23, 143.46, 138.50, 136.49, 134.71, 132.05, 131.31, 130.87, 130.03, 128.08, 127.58, 126.20, 121.71, 121.48, 116.58, 61.01, 37.93, 33.89, 27.50, 14.47. HRMS calcd. for C<sub>22</sub>H<sub>23</sub>N<sub>2</sub>O<sub>3</sub><sup>+</sup> [M+H]<sup>+</sup>: 363.1703, Found: 363.1705.

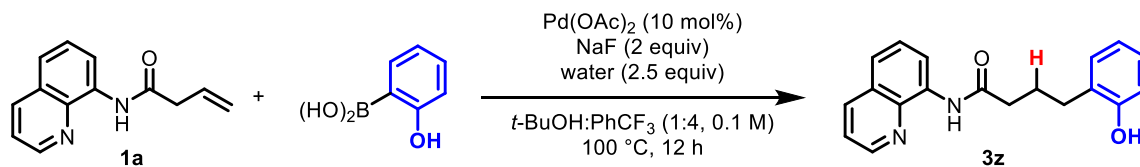

**4-(2-hydroxyphenyl)-N-(quinolin-8-yl)butanamide (3z):** The reaction was carried out according to General Procedure B using 2-hydroxyphenylboronic acid (27.6 mg, 0.2 mmol). The product was purified by preparative TLC (3% EtOAc/toluene) to afford 9 mg (29%) of **3z** as an off-white solid. <sup>1</sup>H NMR (600 MHz, CDCl<sub>3</sub>)  $\delta$  9.92 (s, 1H), 8.88–8.76 (m, 2H), 8.18 (dd,  $J$  = 8.2, 1.7 Hz, 1H), 8.12 (s, 1H), 7.65–7.51 (m, 2H), 7.47 (dd,  $J$  = 8.2, 4.2 Hz, 1H), 7.21–7.09 (m, 2H), 6.93 (dd,  $J$  = 8.0, 1.2 Hz, 1H), 6.84 (td,  $J$  = 7.4, 1.2 Hz, 1H), 2.79 (t,  $J$  = 7.5 Hz, 2H), 2.69–2.60 (m, 2H), 2.11–1.99 (m, 2H). <sup>13</sup>C NMR (150 MHz, CDCl<sub>3</sub>)  $\delta$  173.03, 155.42, 148.40, 138.45, 136.63, 134.10, 130.28, 128.09, 127.90, 127.58, 127.20, 122.13, 121.83, 120.12, 117.27, 116.79, 35.54, 29.47, 26.03. HRMS calcd. for C<sub>19</sub>H<sub>19</sub>N<sub>2</sub>O<sub>2</sub><sup>+</sup> [M+H]<sup>+</sup>: 307.1441, Found: 307.1439.

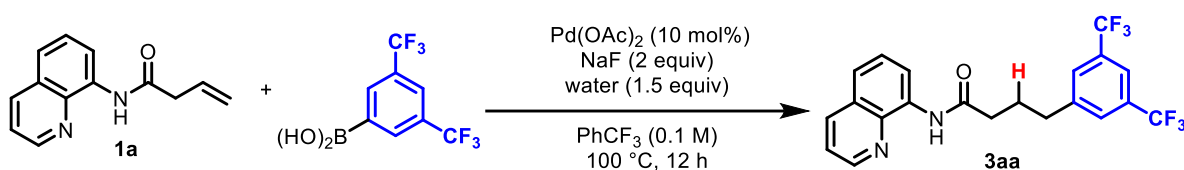

**4-(3,5-bis(trifluoromethyl)phenyl)-*N*-(quinolin-8-yl)butanamide (3aa):** The reaction was carried out according to General Procedure A using 3,5-bis(trifluoromethyl)phenylboronic acid (51.6 mg, 0.2 mmol) and water (2.7  $\mu$ L, 1.5 equiv). The product was purified by preparative TLC (1% EtOAc/toluene) to afford 36.5 mg (94%) of **3aa** as a white solid.  $^1\text{H NMR}$  (600 MHz,  $\text{CDCl}_3$ )  $\delta$  9.83 (s, 1H), 8.83–8.75 (m, 2H), 8.17 (dd,  $J$  = 8.2, 1.7 Hz, 1H), 7.71 (d,  $J$  = 11.5 Hz, 3H), 7.59–7.52 (m, 2H), 7.47 (dd,  $J$  = 8.2, 4.2 Hz, 1H), 2.94–2.88 (m, 2H), 2.64 (t,  $J$  = 7.2 Hz, 2H), 2.24–2.15 (m, 2H).  $^{13}\text{C NMR}$  (150 MHz,  $\text{CDCl}_3$ )  $\delta$  170.74, 148.34, 144.16, 138.43, 136.58, 134.43, 131.79 (d,  $J$  = 33.0 Hz), 128.80, 128.11, 127.56, 123.54 (q,  $J$  = 272.6 Hz), 121.81, 121.77, 120.45–120.18 (m), 116.65, 37.09, 35.03, 26.81.  $^{19}\text{F NMR}$  (376 MHz,  $\text{CDCl}_3$ )  $\delta$  -63.04. **HRMS** calcd. for  $\text{C}_{21}\text{H}_{17}\text{F}_6\text{N}_2\text{O}^+$   $[\text{M}+\text{H}]^+$ : 427.1242, Found: 427.1242.

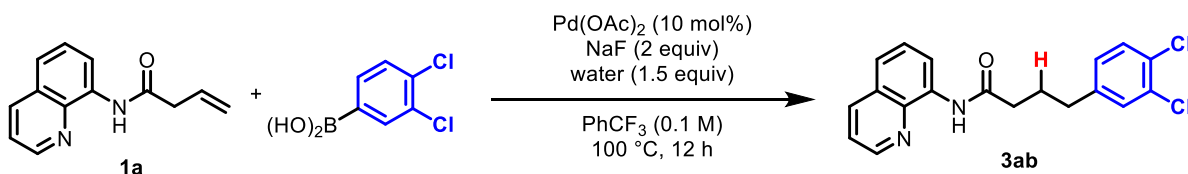

**4-(3,4-dichlorophenyl)-*N*-(quinolin-8-yl)butanamide (3ab):** The reaction was carried out according to General Procedure A using 3,4-dichlorophenylboronic acid (38.2 mg, 0.2 mmol) and water (2.7  $\mu$ L, 1.5 equiv). The product was purified by preparative TLC (2% EtOAc/toluene) to afford 25 mg (70% yield) of **3ab** as a white solid.  $^1\text{H NMR}$  (600 MHz,  $\text{CDCl}_3$ )  $\delta$  9.82 (s, 1H), 8.88–8.75 (m, 2H), 8.19 (dd,  $J$  = 8.3, 1.7 Hz, 1H), 7.59–7.52 (m, 2H), 7.48 (dd,  $J$  = 8.2, 4.2 Hz, 1H), 7.40–7.35 (m, 2H), 7.09 (dd,  $J$  = 8.2, 2.1 Hz, 1H), 2.77–2.72 (m, 2H), 2.60 (t,  $J$  = 7.3 Hz, 2H), 2.15 (p,  $J$  = 7.4 Hz, 2H).  $^{13}\text{C NMR}$  (150 MHz,  $\text{CDCl}_3$ )  $\delta$  170.97, 148.19, 141.76, 138.30, 136.41, 134.34, 132.28, 130.49, 130.32, 129.94, 128.03, 127.95, 127.41, 121.64, 121.56, 116.48, 36.95, 34.24, 26.66. **HRMS** calcd. for  $\text{C}_{19}\text{H}_{17}\text{Cl}_2\text{N}_2\text{O}^+$   $[\text{M}+\text{H}]^+$ : 359.0718, Found: 359.0718.

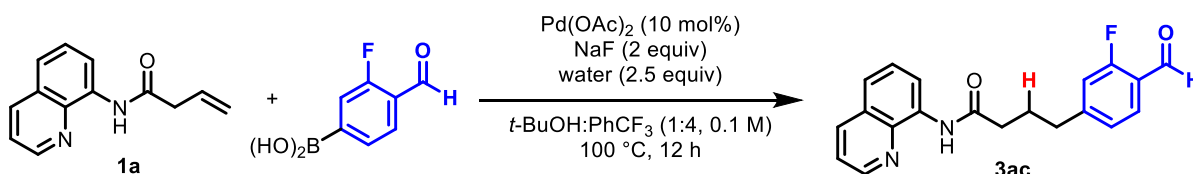

**4-(3-fluoro-4-formylphenyl)-*N*-(quinolin-8-yl)butanamide (3ac):** The reaction was carried out according to General Procedure B using 3-fluoro-4-formylphenylboronic acid (33.6 mg, 0.2 mmol). The product was purified by preparative TLC (5% EtOAc/toluene) to afford 15 mg (45%) of **3ac** as a yellow solid.  $^1\text{H NMR}$  (600 MHz,  $\text{CDCl}_3$ )  $\delta$  10.31 (s, 1H), 9.79 (s, 1H), 8.91–8.68 (m, 2H), 8.17 (dd,  $J$  = 8.3, 1.7 Hz, 1H), 7.79 (t,  $J$  = 7.6 Hz, 1H), 7.58–7.49 (m, 2H), 7.47 (dd,  $J$  = 8.2, 4.2 Hz, 1H), 7.18–7.13 (m, 1H), 7.07 (dd,  $J$  = 11.4, 1.4 Hz, 1H), 2.87–2.81 (m, 2H), 2.60 (t,  $J$  = 7.2 Hz, 2H), 2.18 (p,  $J$  = 7.4 Hz, 2H).  $^{13}\text{C NMR}$  (150 MHz,  $\text{CDCl}_3$ )  $\delta$  186.46, 170.26, 164.36 (d,  $J$  = 258.7 Hz), 151.39 (d,  $J$  = 8.7 Hz), 147.72, 137.82, 135.97, 133.85, 128.30 (d,  $J$  = 2.6 Hz), 127.50, 126.95, 124.57 (d,  $J$  = 2.9 Hz), 121.85 (d,  $J$  = 8.2 Hz), 121.21, 121.14, 116.02, 115.88 (d,  $J$  = 20.3 Hz), 36.45, 34.77, 25.80.  $^{19}\text{F NMR}$  (376 MHz,  $\text{CDCl}_3$ )  $\delta$  -122.41. **HRMS** calcd. for  $\text{C}_{20}\text{H}_{18}\text{FN}_2\text{O}_2^+$   $[\text{M}+\text{H}]^+$ : 337.1347, Found: 337.1348.

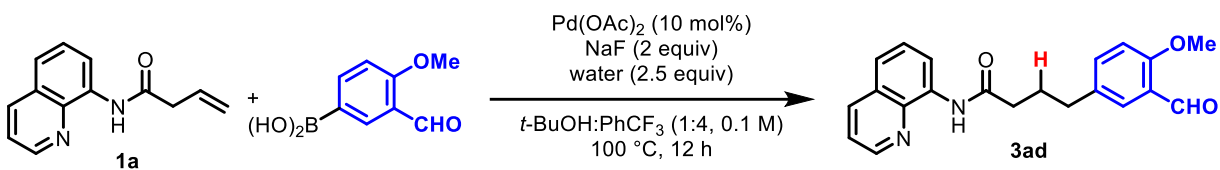

**4-(3-formyl-4-methoxyphenyl)-N-(quinolin-8-yl)butanamide (3ad):** The reaction was carried out according to General Procedure B using 3-formyl-4-methoxyphenylboronic acid (36.2 mg, 0.2 mmol). The product was purified by preparative TLC (2% EtOAc/toluene) to afford 11 mg (32%) of **3ad** as a yellow oil. **<sup>1</sup>H NMR** (600 MHz, CDCl<sub>3</sub>) δ 10.43 (s, 1H), 9.78 (s, 1H), 8.89–8.74 (m, 2H), 8.16 (dd, *J* = 8.3, 1.7 Hz, 1H), 7.70 (d, *J* = 2.4 Hz, 1H), 7.59–7.49 (m, 2H), 7.45 (ddd, *J* = 9.8, 8.3, 3.3 Hz, 2H), 6.92 (d, *J* = 8.5 Hz, 1H), 3.89 (s, 3H), 2.75 (t, *J* = 7.6 Hz, 2H), 2.57 (t, *J* = 7.4 Hz, 2H), 2.14 (p, *J* = 7.5 Hz, 2H). **<sup>13</sup>C NMR** (150 MHz, CDCl<sub>3</sub>) δ 190.05, 171.34, 160.49, 148.31, 138.44, 136.50, 136.29, 134.58, 133.92, 128.34, 128.07, 127.53, 124.75, 121.75, 121.57, 116.56, 111.97, 55.86, 37.32, 34.21, 27.11. **HRMS** calcd. for C<sub>21</sub>H<sub>21</sub>N<sub>2</sub>O<sub>3</sub><sup>+</sup> [M+H]<sup>+</sup>: 349.1547, Found: 349.1547.

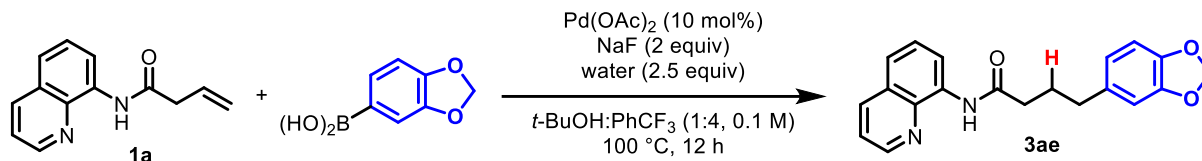

**4-(benzo[*d*][1,3]dioxol-5-yl)-N-(quinolin-8-yl)butanamide (3ae):** The reaction was carried out according to General Procedure B using 3,4-methylenedioxyphenylboronic acid (33.2 mg, 0.2 mmol). The product was purified by preparative TLC (20% EtOAc/hexanes) to afford 14 mg (42%) of **3ae** as an orange oil. **<sup>1</sup>H NMR** (500 MHz, (CD<sub>3</sub>)<sub>2</sub>CO) δ 9.88 (s, 1H), 8.97–8.72 (m, 2H), 8.36 (dd, *J* = 8.3, 1.7 Hz, 1H), 7.79–7.40 (m, 3H), 6.87–6.67 (m, 3H), 6.02–5.86 (m, 2H), 2.90–2.79 (m, 2H), 2.66 (dt, *J* = 35.0, 7.4 Hz, 2H), 2.09–2.02 (m, 2H). **<sup>13</sup>C NMR** (150 MHz, (CD<sub>3</sub>)<sub>2</sub>CO) δ 171.85, 149.41, 148.62, 146.69, 139.13, 137.32, 136.64, 135.94, 129.01, 127.96, 122.81, 122.14, 116.76, 109.69, 108.82, 101.68, 37.41, 37.36, 35.53, 28.32. **HRMS** calcd. for C<sub>20</sub>H<sub>19</sub>N<sub>2</sub>O<sub>3</sub><sup>+</sup> [M+H]<sup>+</sup>: 335.1390, Found: 335.1392.

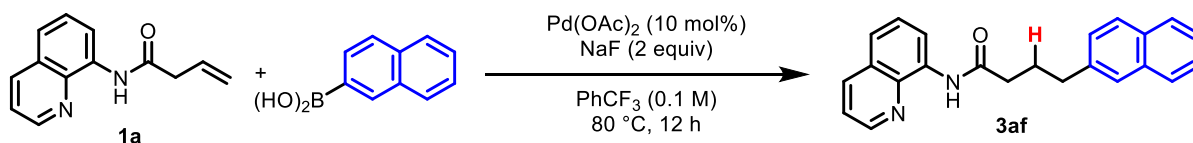

**4-(naphthalen-2-yl)-N-(quinolin-8-yl)butanamide (3af):** The reaction was carried out according to General Procedure A at 80 °C using 2-naphthylboronic acid (24.4 mg, 0.2 mmol) and no water. The product was purified by mass-directed prep LC. The crude material was purified on a Waters Autopurification LC with a Waters BEH C18 column (19×160 mm, 5 mm) using a 0.1% aqueous formic acid:acetonitrile gradient (30 mL/min, main segment of gradient at 65–95% acetonitrile over 8 min) at ambient temperature. Fractionation was triggered by a Waters QDa single quadrupole mass spec in ESI<sup>+</sup> (*m/z* = 341.2 [M+H], cone voltage 15V). Purification afforded 17 mg (50%) of **3af** as an off-white solid. **<sup>1</sup>H NMR** (600 MHz, CDCl<sub>3</sub>) δ 9.79 (s, 1H), 8.83–8.76 (m, 2H), 8.16 (dd, *J* = 8.2, 1.7 Hz, 1H), 7.82–7.74 (m, 3H), 7.68 (dd, *J* = 1.7, 0.9 Hz, 1H), 7.57–7.48 (m, 2H), 7.47–7.37 (m, 4H), 2.94 (t, *J* = 7.5 Hz, 2H), 2.61 (t, *J* = 7.4 Hz, 2H), 2.26 (p, *J* = 7.5 Hz, 2H). **<sup>13</sup>C NMR** (150 MHz, CDCl<sub>3</sub>) δ 171.57, 148.25, 139.12, 138.47, 136.50, 134.64, 133.74, 132.23, 128.17, 128.08, 127.74, 127.61, 127.58, 127.44, 126.86, 126.04, 125.34, 121.72, 121.55, 116.59, 37.39, 35.44, 27.01. **HRMS** calcd. for C<sub>23</sub>H<sub>21</sub>N<sub>2</sub>O<sup>+</sup> [M+H]<sup>+</sup>: 341.1648, Found: 341.1646.

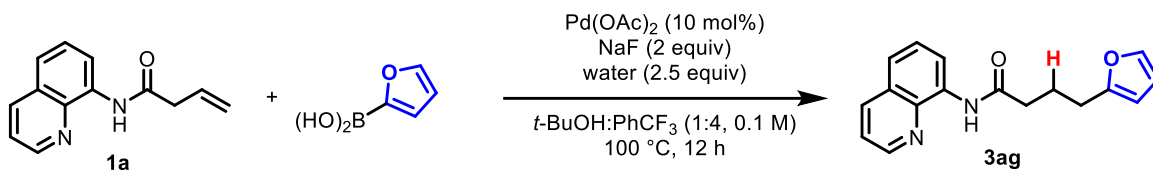

**4-(furan-2-yl)-N-(quinolin-8-yl)butanamide (3ag):** The reaction was carried out according to General Procedure B using 2-furanylboronic acid (22.3 mg, 0.2 mmol). The product was purified by preparative TLC (5% ether/toluene) to afford 7 mg (25%) of **3ag** as a bright orange solid.  $^1\text{H NMR}$  (600 MHz,  $\text{CDCl}_3$ )  $\delta$  9.81 (s, 1H), 8.83–8.76 (m, 2H), 8.16 (dd,  $J = 8.2, 1.7$  Hz, 1H), 7.56–7.52 (m, 1H), 7.50 (dd,  $J = 8.3, 1.5$  Hz, 1H), 7.45 (dd,  $J = 8.2, 4.2$  Hz, 1H), 7.33 (dd,  $J = 1.9, 0.8$  Hz, 1H), 6.29 (dd,  $J = 3.1, 1.9$  Hz, 1H), 6.09–6.05 (m, 1H), 2.80 (td,  $J = 7.3, 0.8$  Hz, 2H), 2.61 (t,  $J = 7.4$  Hz, 2H), 2.18 (p,  $J = 7.3$  Hz, 2H).  $^{13}\text{C NMR}$  (150 MHz,  $\text{CDCl}_3$ )  $\delta$  171.36, 155.35, 148.26, 141.21, 138.48, 136.52, 134.65, 128.09, 127.58, 121.73, 121.55, 116.59, 110.27, 105.60, 37.25, 27.46, 24.11. **HRMS** calcd. for  $\text{C}_{17}\text{H}_{17}\text{N}_2\text{O}_2^+$   $[\text{M}+\text{H}]^+$ : 281.1285, Found: 281.1286.

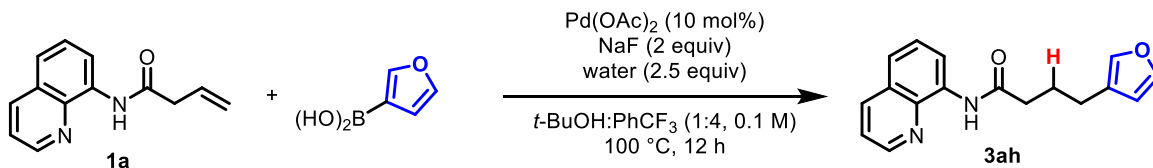

**4-(furan-3-yl)-N-(quinolin-8-yl)butanamide (3ah):** The reaction was carried out according to General Procedure B using 3-furanylboronic acid (22.4 mg, 0.2 mmol). The product was purified by SFC on a Zymor SPHER HADP column with methanol to afford 10 mg (38%) of **3ah** as a white solid.  $^1\text{H NMR}$  (400 MHz,  $\text{CDCl}_3$ )  $\delta$  9.79 (s, 1H), 8.84–8.73 (m, 2H), 8.16 (dd,  $J = 8.2, 1.7$  Hz, 1H), 7.58–7.48 (m, 2H), 7.46 (dd,  $J = 8.3, 4.2$  Hz, 1H), 7.39–7.36 (m, 1H), 7.29 (t,  $J = 1.2$  Hz, 1H), 6.38–6.28 (m, 1H), 2.65–2.52 (m, 4H), 2.09 (p,  $J = 7.5$  Hz, 2H).  $^{13}\text{C NMR}$  (101 MHz,  $\text{CDCl}_3$ )  $\delta$  171.39, 148.11, 142.89, 139.17, 138.31, 136.37, 134.46, 127.93, 127.42, 124.13, 121.58, 121.41, 116.42, 110.90, 37.26, 25.74, 24.14. **HRMS** calcd. for  $\text{C}_{17}\text{H}_{17}\text{N}_2\text{O}_2^+$   $[\text{M}+\text{H}]^+$ : 281.1285, Found: 281.1284.

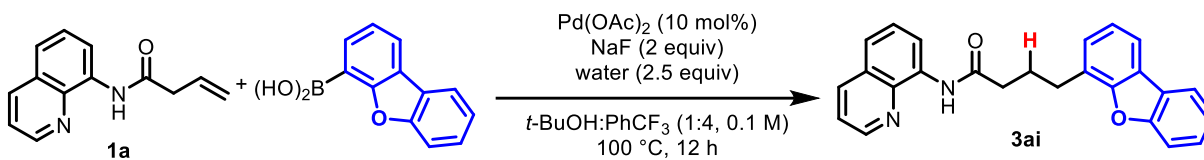

**4-(dibenzo[*b,d*]furan-4-yl)-N-(quinolin-8-yl)butanamide (3ai):** The reaction was carried out according to General Procedure B using 4-(dibenzofuran-4-yl)boronic acid (42.4 mg, 0.2 mmol). The product was purified by SFC on a Zymor SPHER HADP column with methanol to afford 2.7 mg (7%) of **3ai** as a light yellow solid.  $^1\text{H NMR}$  (400 MHz,  $\text{CDCl}_3$ )  $\delta$  9.78 (s, 1H), 8.80 (d,  $J = 7.5$  Hz, 1H), 8.72 (d,  $J = 4.3$  Hz, 1H), 8.15 (d,  $J = 8.2$  Hz, 1H), 7.92 (d,  $J = 7.6$  Hz, 1H), 7.81 (d,  $J = 7.6$  Hz, 1H), 7.59–7.46 (m, 3H), 7.46–7.37 (m, 2H), 7.37–7.27 (m, 3H), 3.15 (t,  $J = 7.5$  Hz, 2H), 2.65 (t,  $J = 7.5$  Hz, 2H), 2.44–2.25 (m, 2H).  $^{13}\text{C NMR}$  (101 MHz,  $\text{CDCl}_3$ )  $\delta$  171.41, 155.99, 154.79, 148.04, 138.30, 136.29, 134.52, 127.90, 127.47, 127.42, 126.90, 125.44, 124.52, 123.93, 122.81, 122.51, 121.53, 121.35, 120.61, 118.46, 116.43, 111.67, 37.43, 29.22, 25.59. **HRMS** calcd. for  $\text{C}_{25}\text{H}_{21}\text{N}_2\text{O}_2^+$   $[\text{M}+\text{H}]^+$ : 381.1598, Found: 381.1595.

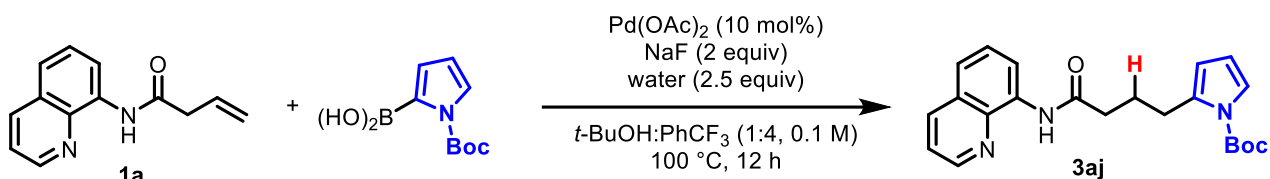

**tert-butyl 2-(4-oxo-4-(quinolin-8-ylamino)butyl)-1H-pyrrole-1-carboxylate (3aj):** The reaction was carried out according to General Procedure B using *N*-Boc-2-pyrroleboronic acid (42.2 mg, 0.2 mmol). The product was purified by preparative TLC (3% EtOAc/toluene) to afford 9 mg (24%) of **3aj** as a dark orange oil. **<sup>1</sup>H NMR** (600 MHz, CDCl<sub>3</sub>) δ 9.81 (s, 1H), 8.98–8.63 (m, 2H), 8.16 (dd, *J* = 8.3, 1.7 Hz, 1H), 7.54 (t, *J* = 7.9 Hz, 1H), 7.50 (dd, *J* = 8.3, 1.5 Hz, 1H), 7.45 (dd, *J* = 8.2, 4.2 Hz, 1H), 7.20 (dd, *J* = 3.4, 1.8 Hz, 1H), 6.09 (t, *J* = 3.3 Hz, 1H), 6.06 (s, 1H), 3.00 (t, *J* = 7.4 Hz, 2H), 2.63 (t, *J* = 7.6 Hz, 2H), 2.16 (p, *J* = 7.5 Hz, 2H), 1.58 (s, 9H). **<sup>13</sup>C NMR** (150 MHz, CDCl<sub>3</sub>) δ 171.66, 149.62, 148.23, 138.48, 136.50, 135.10, 134.69, 128.08, 127.58, 121.70, 121.49, 121.23, 116.59, 111.77, 110.09, 83.54, 37.68, 28.42, 24.88. **HRMS** calcd. for C<sub>22</sub>H<sub>26</sub>N<sub>3</sub>O<sub>3</sub><sup>+</sup> [M+H]<sup>+</sup>: 380.1969, Found: 380.1970.

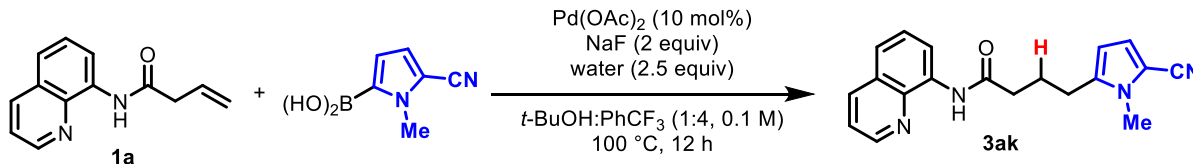

**4-(5-cyano-1-methyl-1H-pyrrol-2-yl)-N-(quinolin-8-yl)butanamide (3ak):** The reaction was carried out according to General Procedure B using 5-cyano-1-methyl-1H-pyrrol-2-ylboronic acid (30.0 mg, 0.2 mmol). The product was purified by SFC on a Zymor SPHER HADP column with methanol to afford 6.6 mg (21%) of **3ak** as an off-white solid. **<sup>1</sup>H NMR** (400 MHz, CDCl<sub>3</sub>) δ 9.81 (bs, 1H), 8.82 (d, *J* = 2.8 Hz, 1H), 8.77 (d, *J* = 6.0 Hz, 1H), 8.19 (d, *J* = 7.7 Hz, 1H), 7.51–7.59 (m, 2H), 7.48 (dd, *J* = 8.2, 4.2 Hz, 1H), 6.73 (d, *J* = 3.9 Hz, 1H), 6.02 (d, *J* = 3.8 Hz, 1H), 3.68 (s, 3H), 2.75 (t, *J* = 7.6 Hz, 2H), 2.67 (t, *J* = 7.0 Hz, 2H), 2.16 (p, *J* = 7.3 Hz, 2H). **<sup>13</sup>C NMR** (101 MHz, CDCl<sub>3</sub>) δ 170.71, 148.18, 138.94, 138.24, 136.57, 134.30, 128.01, 127.47, 121.71, 121.66, 119.13, 116.58, 114.45, 107.88, 103.86, 36.75, 32.33, 25.97, 23.98. **HRMS** calcd. for C<sub>19</sub>H<sub>19</sub>N<sub>4</sub>O<sup>+</sup> [M+H]<sup>+</sup>: 319.1553, Found: 319.1546.

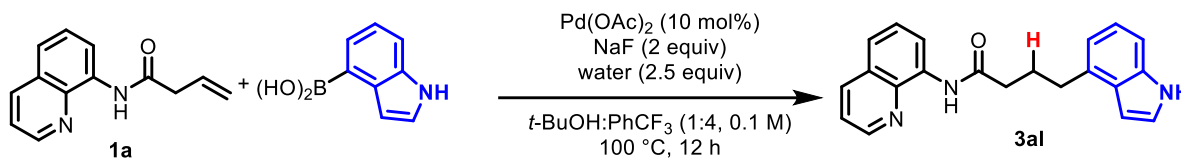

**4-(1H-indol-4-yl)-N-(quinolin-8-yl)butanamide (3al):** The reaction was carried out according to General Procedure B using 4-indolylboronic acid (32.2 mg, 0.2 mmol). The product was purified by SFC on a Zymor SPHER Pyridine-Diol column with methanol to afford 9.7 mg (29%) of **3al** as an off-white solid. **<sup>1</sup>H NMR** (400 MHz, CDCl<sub>3</sub>) δ 9.98 (bs, 1H), 8.81–8.88 (m, 2H), 8.28 (d, *J* = 7.6 Hz, 1H), 7.99 (bs, 1H), 7.67 (d, *J* = 7.8 Hz, 1H), 7.58–7.64 (m, 1H), 7.51–7.57 (m, 2H), 7.36 (d, *J* = 8.1 Hz, 1H), 7.16–7.22 (m, 1H), 7.10–7.14 (m, 1H), 7.06–7.09 (m, 1H), 2.95 (t, *J* = 7.3 Hz, 2H), 2.65–2.74 (m, 2H), 2.27 (p, *J* = 7.4 Hz, 2H). **<sup>13</sup>C NMR** (101 MHz, CDCl<sub>3</sub>) δ 171.82, 148.10, 138.34, 136.78, 134.56, 127.99, 127.54, 127.50, 122.16, 121.63, 121.59, 121.40, 119.35, 119.02, 116.53, 115.72, 111.10, 77.26, 37.66, 25.94, 24.60. **HRMS** calcd. for C<sub>21</sub>H<sub>20</sub>N<sub>3</sub>O<sup>+</sup> [M+H]<sup>+</sup>: 330.1601, Found: 330.1601.

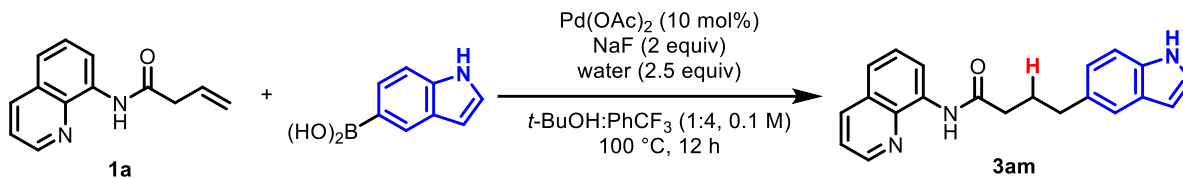

**4-(1H-indol-5-yl)-N-(quinolin-8-yl)butanamide (3am):** The reaction was carried out according to General Procedure B using 5-indolylboronic acid (32.2 mg, 0.2 mmol). The product was purified by SFC on a Zymor SPHER HADP column with methanol to afford 13 mg (40%) of **3am** as a white solid. <sup>1</sup>H NMR (400 MHz, CDCl<sub>3</sub>) δ 9.81 (s, 1H), 8.87–8.74 (m, 2H), 8.16 (dd, *J* = 8.2, 1.7 Hz, 1H), 8.06 (s, 1H), 7.66 (d, *J* = 7.9 Hz, 1H), 7.59–7.47 (m, 2H), 7.45 (dd, *J* = 8.3, 4.2 Hz, 1H), 7.36 (d, *J* = 8.1 Hz, 1H), 7.19 (t, *J* = 7.5 Hz, 1H), 7.11 (t, *J* = 7.4 Hz, 1H), 7.05 (s, 1H), 2.93 (t, *J* = 7.4 Hz, 2H), 2.64 (t, *J* = 7.4 Hz, 2H), 2.27 (p, *J* = 7.4 Hz, 2H). <sup>13</sup>C NMR (101 MHz, CDCl<sub>3</sub>) δ 171.75, 148.06, 138.31, 136.37, 136.33, 134.51, 127.91, 127.47, 127.42, 121.89, 121.58, 121.53, 121.33, 119.17, 118.95, 116.41, 115.64, 111.05, 77.32, 77.00, 76.68, 37.60, 25.88, 24.54. HRMS calcd. for C<sub>21</sub>H<sub>19</sub>N<sub>3</sub>O<sup>+</sup> [M+H]<sup>+</sup>: 352.1420, Found: 352.1418.

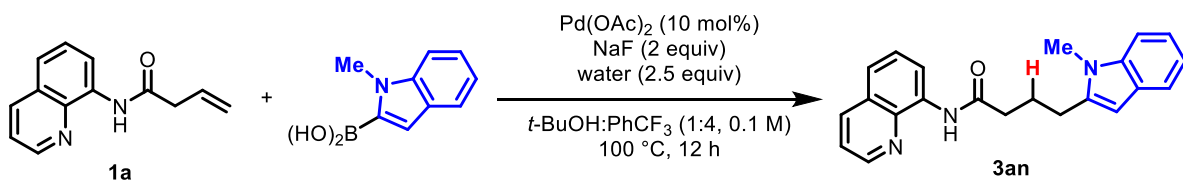

**4-(1-methyl-1H-indol-2-yl)-N-(quinolin-8-yl)butanamide (3an):** The reaction was carried out according to General Procedure B using *N*-methylindole-2-boronic acid (35.0 mg, 0.2 mmol). The product was purified by SFC on a Zymor SPHER HADP 150×4.6mm column with methanol to afford 16 mg (47%) of **3an**. <sup>1</sup>H NMR (400 MHz, CDCl<sub>3</sub>) δ 9.79 (bs, 1H), 8.72–8.87 (m, 2H), 8.16 (d, *J* = 8.0 Hz, 1H), 7.64 (d, *J* = 7.8 Hz, 1H), 7.47–7.59 (m, 2H), 7.45 (dd, *J* = 8.2, 4.2 Hz, 1H), 7.24–7.32 (m, 1H), 7.18–7.24 (m, 1H), 7.06–7.13 (m, 1H), 6.92 (s, 1H), 3.74 (s, 3H), 2.92 (t, *J* = 7.2 Hz, 2H), 2.63 (t, *J* = 7.3 Hz, 2H), 2.25 (p, *J* = 7.3 Hz, 2H). <sup>13</sup>C NMR (101 MHz, CDCl<sub>3</sub>) δ 172.25, 148.47, 138.73, 137.53, 136.88, 134.99, 128.40, 128.34, 127.92, 127.00, 121.99, 121.91, 121.78, 119.53, 119.06, 116.95, 114.53, 109.56, 38.04, 33.02, 26.56, 24.89. HRMS calcd. for C<sub>22</sub>H<sub>22</sub>N<sub>3</sub>O<sup>+</sup> [M+H]<sup>+</sup>: 344.1757, Found: 344.1759.

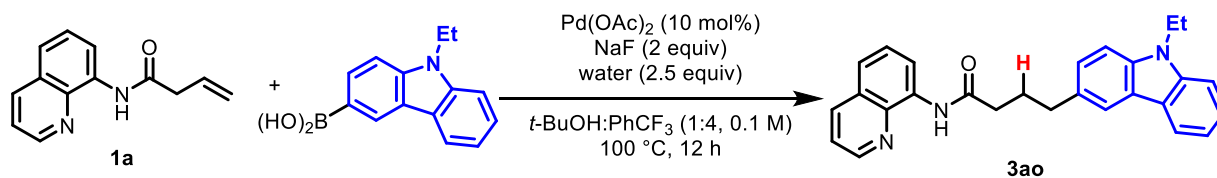

**4-(9-ethyl-9H-carbazol-3-yl)-N-(quinolin-8-yl)butanamide (3ao):** The reaction was carried out according to General Procedure B using 9-ethyl-3-carbazole boronic acid (47.8mg, 0.2 mmol). The product was purified by SFC on a Zymor SPHER HADP 150×4.6mm column with methanol to afford 15 mg (36%) of **3ao** as an off-white solid. <sup>1</sup>H NMR (400 MHz, CDCl<sub>3</sub>) δ 10.07 (b s, 1H), 8.86 (d, *J* = 7.7 Hz, 1H), 8.77 (dd, *J* = 4.5, 1.7 Hz, 1H), 8.31 (s, 1H), 8.04 (d, *J* = 7.7 Hz, 1H), 7.98 (s, 1H), 7.56–7.50 (m, 3H), 7.45–7.29 (m, 4H), 7.17 (t, *J* = 7.4 Hz, 1H), 7.34–7.26 (m, 2H), 2.98 (t, *J* = 7.5 Hz, 2H), 2.73 (t, *J* = 7.1 Hz, 2H), 2.27 (p, *J* = 7.4 Hz, 2H), 1.40 (t, *J* = 7.2 Hz, 3H). <sup>13</sup>C NMR (101 MHz, CDCl<sub>3</sub>) δ 171.9, 148.0, 140.3, 138.7, 136.8, 134.6, 132.0, 128.1, 127.7, 126.6, 125.6, 123.2, 122.9, 121.6, 121.5, 120.5, 120.3, 118.7, 116.9, 108.5, 37.7, 37.5, 35.4, 27.9, 14.0 (Note: two sp<sup>2</sup> carbons not observed, possibly due to signal overlap). HRMS calcd. for C<sub>27</sub>H<sub>26</sub>N<sub>3</sub>O<sup>+</sup> [M+H]<sup>+</sup>: 408.2070, Found: 408.2086.



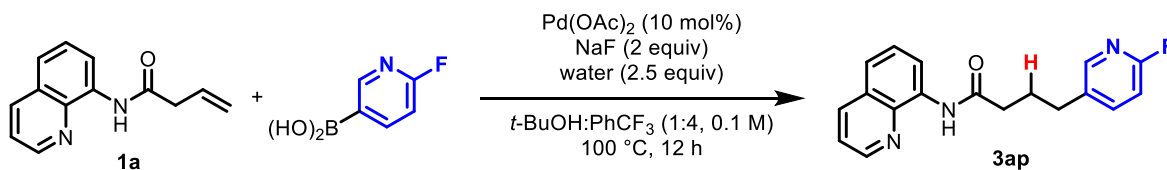

**4-(6-fluoropyridin-3-yl)-N-(quinolin-8-yl)butanamide (3ap):** The reaction was carried out according to General Procedure B using 6-fluoro-3-pyridylboronic acid (28.2 mg, 0.2 mmol). The product was purified by preparative TLC (20% EtOAc/hexanes) to afford 5 mg (16%) of **3ap** as an orange solid. **<sup>1</sup>H NMR** (600 MHz,  $\text{CDCl}_3$ )  $\delta$  9.81 (s, 1H), 8.86–8.72 (m, 2H), 8.17 (dd,  $J = 8.3, 1.7$  Hz, 1H), 8.09 (d,  $J = 2.5$  Hz, 1H), 7.68 (td,  $J = 8.0, 2.6$  Hz, 1H), 7.61–7.48 (m, 2H), 7.47 (dd,  $J = 8.2, 4.2$  Hz, 1H), 6.87 (dd,  $J = 8.3, 2.9$  Hz, 1H), 2.82–2.71 (m, 2H), 2.61 (t,  $J = 7.3$  Hz, 2H), 2.15 (p,  $J = 7.4$  Hz, 2H). **<sup>13</sup>C NMR** (150 MHz,  $\text{CDCl}_3$ )  $\delta$  170.95, 162.56 (d,  $J = 237.2$  Hz), 148.33, 147.25 (d,  $J = 14.1$  Hz), 141.31 (d,  $J = 7.6$  Hz), 138.43, 136.57, 134.53 (d,  $J = 4.2$  Hz), 134.45, 128.10, 127.55, 121.78 (d,  $J = 9.4$  Hz), 116.63, 109.35, 109.23. **<sup>19</sup>F NMR** (376 MHz,  $\text{CDCl}_3$ )  $\delta$  -72.11. **HRMS** calcd. for  $\text{C}_{17}\text{H}_{18}\text{FN}_3\text{O}^+$  [ $\text{M}+\text{H}$ ] $^+$ : 310.1350, Found: 310.1351.

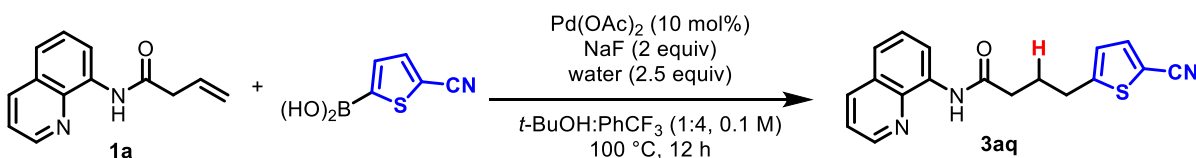

**4-(5-cyanothiophen-2-yl)-N-(quinolin-8-yl)butanamide (3aq):** The reaction was carried out according to General Procedure B using 5-cyanothiophene-2-boronic acid (30.5 mg, 0.2 mmol). The product was purified by SFC on a Zymor SPHER HADP column with methanol to afford 6 mg (19%) of **3aq** as an off-white solid. **<sup>1</sup>H NMR** (400 MHz,  $\text{CDCl}_3$ )  $\delta$  9.93 (bs, 1H), 8.84 (dd,  $J = 4.3, 1.5$  Hz, 1H), 8.80 (dd,  $J = 7.1, 1.3$  Hz, 1H), 8.26 (d,  $J = 8.0$  Hz, 1H), 7.56–7.63 (m, 2H), 7.51–7.56 (m, 1H), 7.48 (d,  $J = 3.8$  Hz, 1H), 6.89 (d,  $J = 3.8$  Hz, 1H), 3.04 (t,  $J = 7.6$  Hz, 2H), 2.59–2.73 (m, 2H), 2.23 (p,  $J = 7.4$  Hz, 2H). **<sup>13</sup>C NMR** (101 MHz,  $\text{CDCl}_3$ )  $\delta$  171.20, 152.86, 148.23, 138.29, 137.78, 136.48, 134.29, 127.99, 127.44, 125.50, 121.72, 121.69, 116.52, 114.54, 107.39, 36.58, 29.41, 26.92. **HRMS** calcd. for  $\text{C}_{18}\text{H}_{16}\text{N}_3\text{OS}^+$  [ $\text{M}+\text{H}$ ] $^+$ : 322.1009, Found: 322.1012.

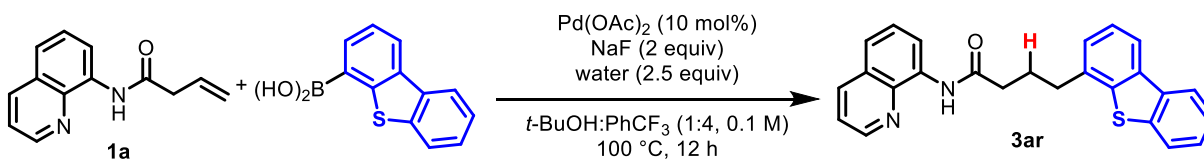

**4-(dibenzo[*b,d*]thiophen-4-yl)-N-(quinolin-8-yl)butanamide (3ar):** The reaction was carried out according to General Procedure B using 4-dibenzo[thiophen-4-yl]boronic acid (45.6 mg, 0.2 mmol). The product was purified by SFC on a Zymor SPHER HADP column with methanol to afford 14 mg (36%) of **3ar** as a white solid. **<sup>1</sup>H NMR** (400 MHz,  $\text{CDCl}_3$ )  $\delta$  9.79 (s, 1H), 8.80 (dd,  $J = 7.3, 1.5$  Hz, 1H), 8.74 (dd,  $J = 4.2, 1.7$  Hz, 1H), 8.18–8.09 (m, 2H), 8.09–7.99 (m, 1H), 7.89–7.78 (m, 1H), 7.58–7.47 (m, 2H), 7.47–7.39 (m, 4H), 7.37 (d,  $J = 7.3$  Hz, 1H), 3.07 (t,  $J = 7.5$  Hz, 2H), 2.66 (t,  $J = 7.4$  Hz, 2H), 2.37 (p,  $J = 7.4$  Hz, 2H). **<sup>13</sup>C NMR** (101 MHz,  $\text{CDCl}_3$ )  $\delta$  171.17, 148.04, 139.27, 139.08, 138.28, 136.28, 136.11, 135.75, 135.69, 134.47, 127.89, 127.40, 126.59, 126.41, 124.86, 124.31, 122.77, 121.67, 121.52, 121.37, 119.50, 116.44, 37.31, 34.36, 24.80. **HRMS** calcd. for  $\text{C}_{25}\text{H}_{21}\text{N}_2\text{OS}^+$  [ $\text{M}+\text{H}$ ] $^+$ : 397.1369, Found: 397.1364.

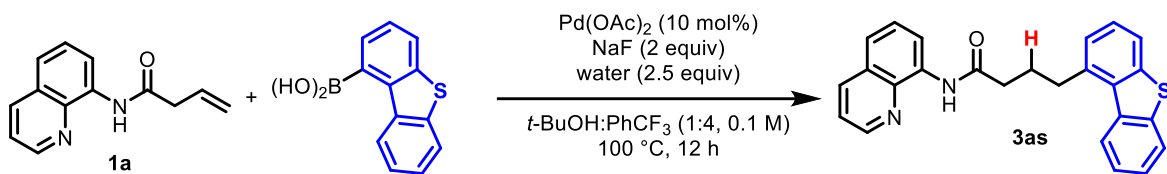

**4-(dibenzo[b,d]thiophen-1-yl)-N-(quinolin-8-yl)butanamide (3as):** The reaction was carried out according to General Procedure B using 1-dibenzothienylboronic acid (45.6 mg, 0.2 mmol). The product was purified by SFC on a Zymor SPHER HADP column with methanol to afford 12 mg (31%) of **3as** as a white solid.  $^1\text{H NMR}$  (400 MHz,  $\text{CDCl}_3$ )  $\delta$  9.79 (s, 1H), 8.86–8.77 (m, 1H), 8.74 (dd,  $J = 4.2, 1.7$  Hz, 1H), 8.22–8.09 (m, 2H), 8.02 (d,  $J = 7.7$  Hz, 1H), 7.83 (dd,  $J = 6.1, 3.0$  Hz, 1H), 7.58–7.47 (m, 2H), 7.43 (td,  $J = 8.0, 4.0$  Hz, 4H), 7.37 (d,  $J = 7.3$  Hz, 1H), 3.07 (t,  $J = 7.5$  Hz, 2H), 2.66 (t,  $J = 7.4$  Hz, 2H), 2.37 (p,  $J = 7.4$  Hz, 2H).  $^{13}\text{C NMR}$  (101 MHz,  $\text{CDCl}_3$ )  $\delta$  171.17, 148.04, 139.27, 139.08, 138.28, 136.28, 136.11, 135.75, 135.69, 134.47, 127.89, 127.40, 126.59, 126.41, 124.86, 124.31, 122.77, 121.67, 121.52, 121.37, 119.50, 116.44, 37.31, 34.36, 24.81. **HRMS** calcd. for  $\text{C}_{25}\text{H}_{21}\text{N}_2\text{OS}^+$   $[\text{M}+\text{H}]^+$ : 397.1369, Found: 397.1368.

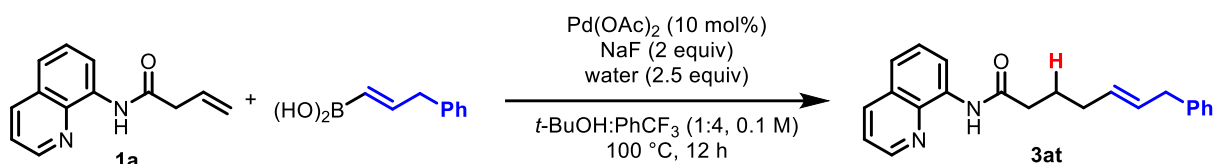

**(E)-7-phenyl-N-(quinolin-8-yl)hept-5-enamide (3at):** The reaction was carried out according to General Procedure B using *E*-3-phenylpropen-1-yl-boronic acid (32.4 mg, 0.2 mmol). The product was purified by mass-directed prep LC. The crude material was purified on a Waters Autopurification LC with a Waters BEH C18 column (19×160 mm, 5 mm) using a 0.1% aqueous formic acid:acetonitrile gradient (30 mL/min, main segment of gradient at 65–95% acetonitrile over 8 min) at ambient temperature. Fractionation was triggered by a Waters QDa single quadrupole mass spec in ESI+ ( $m/z = 331.2$   $[\text{M}+\text{H}]^+$ , cone voltage 15V). Purification afforded 11 mg (33%) of **3at** (20:80 *Z/E*) as a yellow solid.  $^1\text{H NMR}$  (600 MHz,  $\text{CDCl}_3$ )  $\delta$  9.80 (s, 1H), 8.84–8.63 (m, 2H), 8.16 (dd,  $J = 8.2, 1.7$  Hz, 1H), 7.54 (t,  $J = 7.9$  Hz, 1H), 7.50 (dd,  $J = 8.3, 1.5$  Hz, 1H), 7.45 (dd,  $J = 8.2, 4.2$  Hz, 1H), 7.27 (t,  $J = 6.9$  Hz, 2H), 7.21–7.16 (m, 3H), 5.71–5.61 (m, 1H), 5.59–5.49 (m, 1H), 3.35 (d,  $J = 6.7$  Hz, 2H), 2.57 (t,  $J = 7.6$  Hz, 2H), 2.19 (q,  $J = 7.2$  Hz, 2H), 1.92 (p,  $J = 7.4$  Hz, 2H).  $^{13}\text{C NMR}$  (150 MHz,  $\text{CDCl}_3$ )  $\delta$  171.84, 148.25, 140.99, 138.49, 136.52, 134.69, 130.90, 130.28, 128.63, 128.51, 128.09, 127.61, 126.04, 121.72, 121.50, 116.57, 39.17, 37.64, 32.10, 25.44. **HRMS** calcd. for  $\text{C}_{22}\text{H}_{23}\text{N}_2\text{O}^+$   $[\text{M}+\text{H}]^+$ : 331.1810, Found: 331.1812.

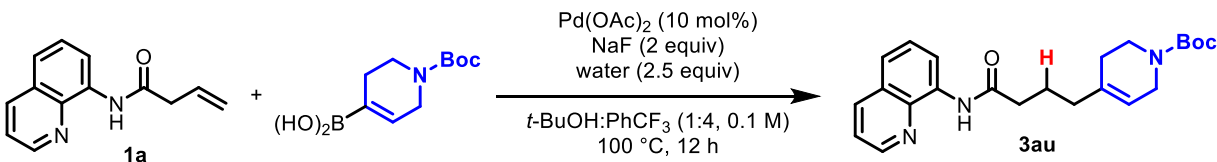

**tert-butyl 4-(4-oxo-4-(quinolin-8-ylamino)butyl)-3,6-dihydropyridine-1(2H)-carboxylate (3au):** The reaction was carried out according to General Procedure B using *N*-Boc-1,2,3,6-tetrahydropyridine-4-boronic acid (45.4 mg, 0.2 mmol). The product was purified by preparative TLC (20% EtOAc/hexanes) to afford 12 mg (30%) of **3au** as a colorless oil.  $^1\text{H NMR}$  (600 MHz,  $\text{CDCl}_3$ )  $\delta$  9.80 (s, 1H), 8.88–8.68 (m, 2H), 8.17 (dd,  $J = 8.2, 1.7$  Hz, 1H), 7.62–7.41 (m, 3H), 5.43 (s, 1H), 3.86 (s, 2H), 3.50 (d,  $J = 5.9$  Hz, 2H), 2.55 (t,  $J = 7.4$  Hz, 2H), 2.18–2.03 (m, 4H), 1.95 (p,  $J = 7.4$  Hz, 2H), 1.47 (s, 9H).  $^{13}\text{C NMR}$  (150 MHz,  $\text{CDCl}_3$ )  $\delta$  171.62, 148.28, 138.47, 136.54, 134.63, 128.10, 127.60, 121.75, 121.56, 116.57, 79.58, 37.51, 36.68, 29.85, 28.65, 28.53, 28.29, 23.17. **HRMS** calcd. for  $\text{C}_{23}\text{H}_{30}\text{N}_3\text{O}_3^+$   $[\text{M}+\text{H}]^+$ : 396.2282, Found: 396.2279.

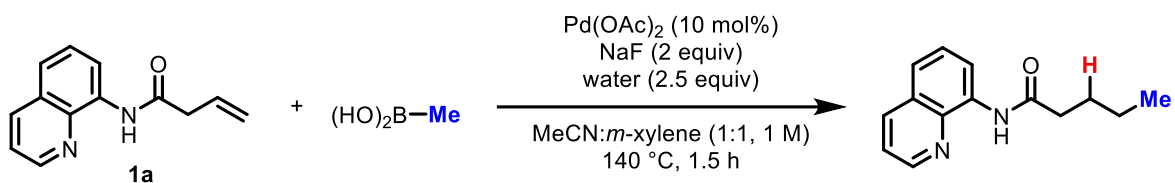

**N-(quinolin-8-yl)pentanamide (6):** The reaction was carried out according to General Procedure A at  $140\text{ }^\circ\text{C}$  using  $\text{MeCN:m-xylene}$  (1:1, 0.1 mL), methylboronic acid (28.2 mg, 0.2 mmol) and water (4.5  $\mu\text{L}$ , 2.5 equiv). The product was purified by preparative TLC (2% EtOAc/tol) to afford 4 mg (18%) of **6** as an orange oil.  **$^1\text{H}$  NMR** (600 MHz,  $\text{CDCl}_3$ ) 9.81 (s, 1H), 8.80 (ddd,  $J = 8.9, 5.9, 1.5$  Hz, 2H), 8.16 (dd,  $J = 8.2, 1.7$  Hz, 1H), 7.54 (t,  $J = 7.9$  Hz, 1H), 7.50 (dd,  $J = 8.3, 1.4$  Hz, 1H), 7.46 (dd,  $J = 8.3, 4.2$  Hz, 1H), 2.57 (t,  $J = 7.6$  Hz, 2H), 1.81 (p,  $J = 7.6$  Hz, 2H), 1.47 (h,  $J = 7.4$  Hz, 2H), 0.99 (t,  $J = 7.4$  Hz, 3H).  **$^{13}\text{C}$  NMR** (150 MHz,  $\text{CDCl}_3$ )  $\delta$  172.07, 148.25, 138.50, 136.52, 134.74, 128.09, 127.61, 121.70, 121.45, 116.55, 38.17, 27.92, 22.60, 14.02. **HRMS** calcd. for  $\text{C}_{14}\text{H}_{17}\text{N}_2\text{O}^+$   $[\text{M}+\text{H}]^+$ : 229.1335, Found: 229.1335.

### General Procedure for Evaluating Alkene Scope

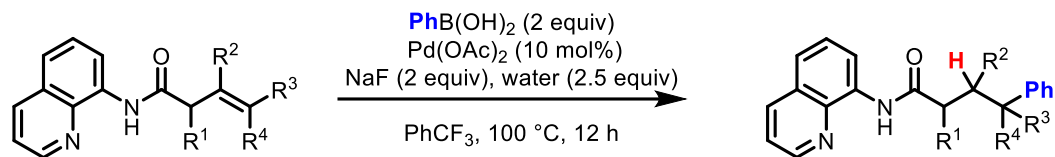

Unless otherwise stated, the procedure for evaluating the alkene scope was as follows.

**General Procedure C:** To a 1-dram (4 mL) vial equipped with a magnetic stir bar were added  $\text{Pd(OAc)}_2$  (2.2 mg, 0.01 mmol), alkene (21.2 mg, 0.1 mmol), phenylboronic acid (24.4 mg, 0.2 mmol), NaF (8.4 mg, 0.2 mmol), water (4.5  $\mu\text{L}$ , 0.25 mmol), and benzotrifluoride (1 mL). The vial was sealed with an unpunctured TFE septum-covered screw cap, and placed in a heating block that was pre-heated to 100 °C. After 12 h, the reaction was brought to room temperature, filtered through a plug of silica gel, and washed with acetone to elute all organic materials. The filtrate was concentrated by vacuum, re-dissolved in acetone, and separated by preparative TLC.

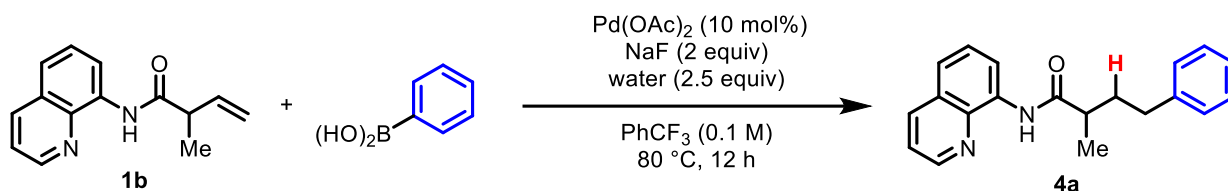

**2-methyl-4-phenyl-*N*-(quinolin-8-yl)butanamide (4a):** The reaction was carried out according to General Procedure C at  $80\text{ }^\circ\text{C}$  using alkene **1b** (22.6 mg, 0.1 mmol). The product was purified by mass-directed prep LC. The crude material was purified on a Waters Autopurification LC with a Waters BEH C18 column (19×160 mm, 5 mm) using a 0.1% aqueous formic acid:acetonitrile gradient (30 mL/min, main segment of gradient at 65–95% acetonitrile over 8 min) at ambient temperature. Fractionation was triggered by a Waters QDa single quadrupole mass spec in ESI+ ( $m/z = 305.2$  [M+H]<sup>+</sup>, cone voltage 15V). Purification afforded 25 mg (82%) of **4a** as a yellow solid. <sup>1</sup>H NMR (600 MHz, CDCl<sub>3</sub>)  $\delta$  9.87 (s, 1H), 8.85–8.79 (m, 2H), 8.17 (dd,  $J = 8.2, 1.7$  Hz, 1H), 7.57–7.49 (m, 2H), 7.46 (dd,  $J = 8.2, 4.2$  Hz, 1H), 7.30–7.17 (m, 5H), 2.81–2.68 (m, 2H), 2.63 (dq,  $J = 8.5, 6.9, 5.6$  Hz, 1H), 2.22 (dddd,  $J = 14.0, 9.4, 8.4, 5.8$  Hz, 1H), 1.86 (dddd,  $J = 13.6, 9.5, 6.8, 5.6$  Hz, 1H), 1.36 (d,  $J = 6.9$  Hz, 3H). <sup>13</sup>C NMR (150 MHz, CDCl<sub>3</sub>)  $\delta$  175.14, 148.28, 141.90, 138.63, 136.51, 134.70, 128.65, 128.54, 128.10, 127.60, 126.02, 121.73, 121.55, 116.66, 42.43, 36.19, 33.78, 18.40. HRMS calcd. for C<sub>20</sub>H<sub>21</sub>N<sub>2</sub>O<sup>+</sup> [M+H]<sup>+</sup>: 305.1648, Found: 305.1647.

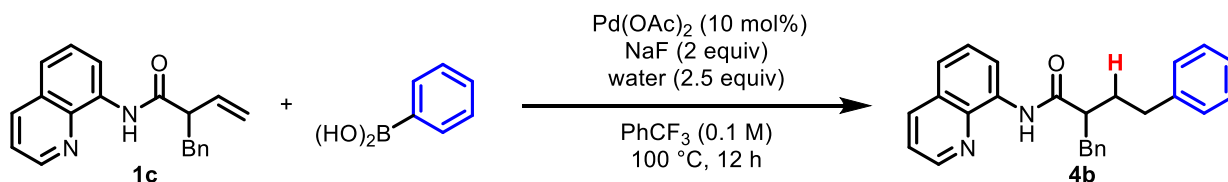

**2-benzyl-4-phenyl-*N*-(quinolin-8-yl)butanamide (4b):** The reaction was carried out according to General Procedure C using alkene **1c** (26.8 mg, 0.08 mmol). The product was purified by preparative TLC (10% ether/toluene) to afford 24 mg (72%) of **4b** as a yellow solid. <sup>1</sup>H NMR (600 MHz, CDCl<sub>3</sub>)  $\delta$  9.69 (s, 1H), 8.81 (dd,  $J = 7.6, 1.4$  Hz, 1H), 8.75 (dd,  $J = 4.2, 1.7$  Hz, 1H), 8.13 (dd,  $J = 8.2, 1.7$  Hz, 1H), 7.53 (t,  $J = 7.9$  Hz, 1H), 7.49 (dd,  $J = 8.3, 1.4$  Hz, 1H), 7.42 (dd,  $J = 8.2, 4.2$  Hz, 1H), 7.28–7.08 (m, 9H), 3.17 (dd,  $J = 13.7, 8.1$  Hz, 1H), 2.89 (dd,  $J = 13.7, 6.7$  Hz, 1H), 2.85–2.73 (m, 2H), 2.65 (ddd,  $J = 14.0, 9.5, 6.9$  Hz, 1H), 2.21 (dtd,  $J = 14.7, 9.5, 5.3$  Hz, 1H), 1.93 (dddd,  $J = 14.0, 9.8, 6.9, 4.4$  Hz, 1H). <sup>13</sup>C NMR (150 MHz, CDCl<sub>3</sub>)  $\delta$  173.54, 148.06, 141.52, 139.38, 138.38, 136.24, 134.29, 128.96, 128.49, 128.41, 128.38, 127.87, 127.37, 126.27, 125.90, 121.54, 121.50, 116.56, 50.36, 39.31, 34.15, 33.61. HRMS calcd. for C<sub>26</sub>H<sub>25</sub>N<sub>2</sub>O<sup>+</sup> [M+H]<sup>+</sup>: 381.1961, Found: 381.1959.

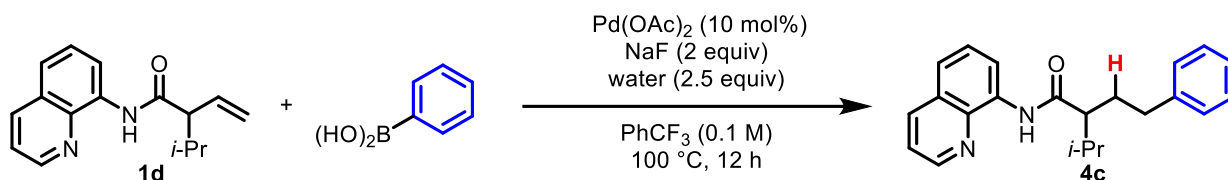

**2-isopropyl-4-phenyl-*N*-(quinolin-8-yl)butanamide (4c):** The reaction was carried out according to General Procedure C using alkene **1d** (25.4 mg, 0.1 mmol). The product was purified by mass-directed prep LC. The crude material was purified on a Waters Autopurification LC with a Waters BEH C18 column (19×160 mm, 5 mm) using a 0.1% aqueous formic acid:acetonitrile gradient (30 mL/min, main segment of gradient at 65–95% acetonitrile over 8 min) at ambient temperature. Fractionation was triggered by a Waters QDa single quadrupole mass spec in ESI+ ( $m/z = 333.2$  [M+H]<sup>+</sup>, cone voltage 15V). Purification afforded 19 mg (57%) of **4c** as a pale yellow oil. <sup>1</sup>H NMR (600 MHz, CDCl<sub>3</sub>)  $\delta$  9.83 (s, 1H), 8.87 (dd,  $J = 7.6, 1.5$  Hz, 1H), 8.82 (dd,  $J = 4.2,$

1.7 Hz, 1H), 8.17 (dd,  $J = 8.2, 1.7$  Hz, 1H), 7.56 (t,  $J = 7.9$  Hz, 1H), 7.52 (dd,  $J = 8.3, 1.5$  Hz, 1H), 7.46 (dd,  $J = 8.2, 4.2$  Hz, 1H), 7.30–7.23 (m, 2H), 7.22–7.14 (m, 3H), 2.79 (ddd,  $J = 14.2, 9.9, 4.8$  Hz, 1H), 2.59 (ddd,  $J = 13.7, 9.3, 7.1$  Hz, 1H), 2.22 (ddd,  $J = 10.8, 7.6, 3.1$  Hz, 1H), 2.19–2.11 (m, 1H), 2.03 (dq,  $J = 13.8, 6.9$  Hz, 1H), 1.95 (dddd,  $J = 13.2, 10.2, 7.1, 3.1$  Hz, 1H), 1.03 (dd,  $J = 6.7, 4.5$  Hz, 6H).  $^{13}\text{C NMR}$  (150 MHz,  $\text{CDCl}_3$ )  $\delta$  174.03, 148.16, 141.99, 138.49, 136.33, 134.42, 128.53, 128.36, 127.98, 127.47, 125.82, 121.59, 121.41, 116.51, 55.68, 34.02, 32.03, 31.28, 20.90, 20.41. **HRMS** calcd. for  $\text{C}_{22}\text{H}_{25}\text{N}_2\text{O}^+$   $[\text{M}+\text{H}]^+$ : 333.1967, Found: 333.1968.

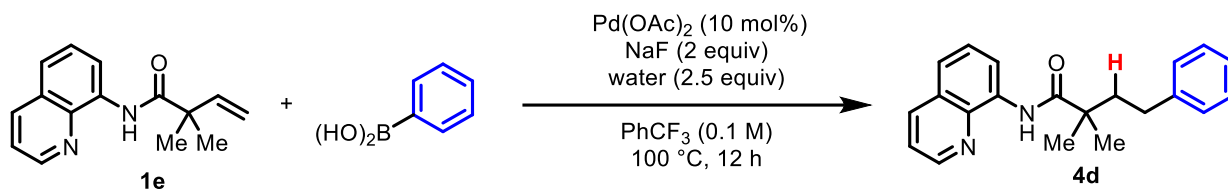

**2,2-dimethyl-4-phenyl-N-(quinolin-8-yl)butanamide (4d)**: The reaction was carried out according to General Procedure C using alkene **1e** (24.0 mg, 0.1 mmol). The product was purified by mass-directed prep LC. The crude material was purified on a Waters Autopurification LC with a Waters BEH C18 column (19×160 mm, 5 mm) using a 0.1% aqueous formic acid:acetonitrile gradient (30 mL/min, main segment of gradient at 65–95% acetonitrile over 8 min) at ambient temperature. Fractionation was triggered by a Waters QDa single quadrupole mass spec in ESI+ ( $m/z = 319.2$   $[\text{M}+\text{H}]$ , cone voltage 15V). Purification afforded 5 mg (16%) of **4d** as a colorless oil.  $^1\text{H NMR}$  (600 MHz,  $\text{CDCl}_3$ )  $\delta$  10.32 (s, 1H), 9.04–8.57 (m, 2H), 8.17 (dd,  $J = 8.3, 1.7$  Hz, 1H), 7.55 (t,  $J = 7.9$  Hz, 1H), 7.53–7.49 (m, 1H), 7.49–7.46 (m, 1H), 7.28–7.18 (m, 4H), 7.15 (t,  $J = 7.2$  Hz, 1H), 2.74–2.49 (m, 2H), 2.09–1.92 (m, 2H), 1.48 (s, 6H).  $^{13}\text{C NMR}$  (150 MHz,  $\text{CDCl}_3$ )  $\delta$  176.09, 148.18, 142.22, 138.77, 136.27, 134.55, 128.34, 128.26, 127.90, 127.41, 125.69, 121.51, 121.24, 116.24, 43.84, 43.68, 31.48, 25.71. **HRMS** calcd. for  $\text{C}_{21}\text{H}_{23}\text{N}_2\text{O}^+$   $[\text{M}+\text{H}]^+$ : 319.1810, Found: 319.1809.

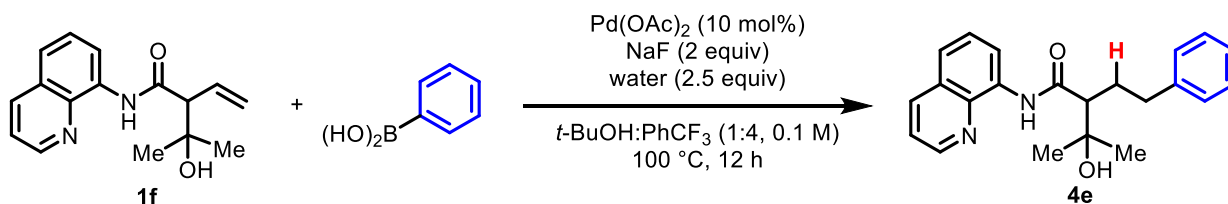

**3-hydroxy-3-methyl-2-phenethyl-N-(quinolin-8-yl)butanamide (4e)**: The reaction was carried out according to General Procedure B using alkene **1f** (27.0 mg, 0.1 mmol) and phenylboronic acid (24.4 mg, 0.2 mmol). The product was purified by preparative TLC (20% EtOAc/hex) to afford 24 mg (69%) of **4e** as an orange oil.  $^1\text{H NMR}$  (600 MHz,  $\text{DMSO}-d_6$ )  $\delta$  10.39 (d,  $J = 4.0$  Hz, 1H), 9.09–8.83 (m, 1H), 8.73 (dd,  $J = 8.0, 3.8$  Hz, 1H), 8.54–8.28 (m, 1H), 7.60 (dddd,  $J = 27.9, 12.2, 8.0, 3.7$  Hz, 3H), 7.41–7.01 (m, 5H), 5.08–4.81 (s, 1H), 2.60 (ddt,  $J = 14.4, 9.4, 4.5$  Hz, 2H), 2.53–2.44 (m, 2H), 1.88 (qt,  $J = 12.6, 9.8, 4.5$  Hz, 2H), 1.17 (dd,  $J = 22.3, 4.0$  Hz, 6H).  $^{13}\text{C NMR}$  (150 MHz,  $\text{DMSO}$ )  $\delta$  172.62, 148.82, 141.74, 138.03, 136.55, 134.72, 128.28, 128.25, 127.84, 127.07, 125.76, 122.09, 121.47, 116.08, 70.19, 58.45, 33.68, 29.59, 28.64, 26.99. **HRMS** calcd. for  $\text{C}_{22}\text{H}_{25}\text{N}_2\text{O}_2^+$   $[\text{M}+\text{H}]^+$ : 349.1911, Found: 349.1910.

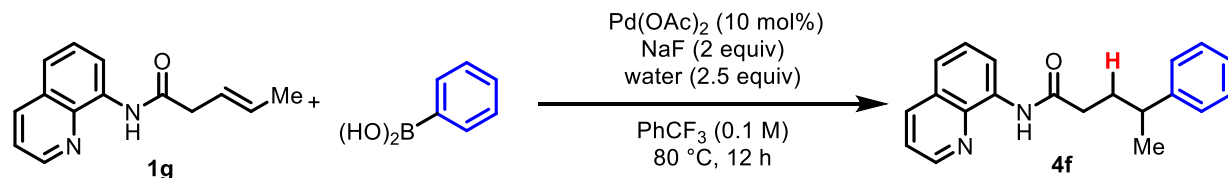

**4-phenyl-N-(quinolin-8-yl)pentanamide (4f)**: The reaction was carried out according to General Procedure

C at 80 °C using alkene **1g** (22.6 mg, 0.1 mmol). The product was purified by preparative TLC (1% EtOAc/toluene) to afford 27 mg (89%) of **4f** as a pale orange oil. **<sup>1</sup>H NMR** (600 MHz, CDCl<sub>3</sub>) δ 9.71 (s, 1H), 8.80–8.73 (m, 2H), 8.15 (dd, *J* = 8.3, 1.7 Hz, 1H), 7.56–7.46 (m, 2H), 7.44 (dd, *J* = 8.2, 4.2 Hz, 1H), 7.31 (t, *J* = 7.6 Hz, 2H), 7.27–7.17 (m, 3H), 2.87–2.79 (m, 1H), 2.43 (t, *J* = 7.7 Hz, 2H), 2.21–2.01 (m, 2H), 1.33 (d, *J* = 7.0 Hz, 3H). **<sup>13</sup>C NMR** (150 MHz, CDCl<sub>3</sub>) δ 171.78, 148.06, 146.53, 138.27, 136.63, 134.58, 128.65, 128.07, 127.60, 127.26, 126.32, 121.65, 121.48, 116.70, 39.66, 36.32, 33.80, 22.68. **HRMS** calcd. for C<sub>20</sub>H<sub>21</sub>ClN<sub>2</sub>O<sup>+</sup> [M+H]<sup>+</sup>: 305.1648, Found: 305.1648.

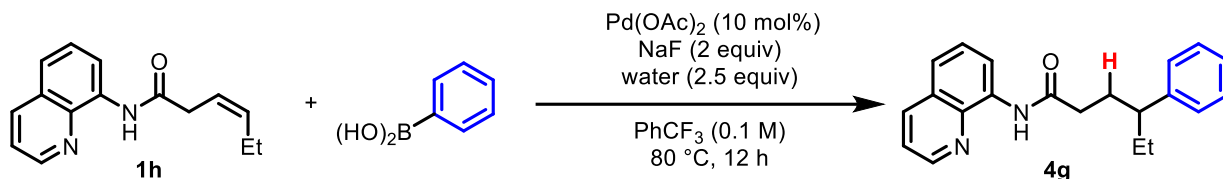

**4-phenyl-*N*-(quinolin-8-yl)hexanamide (4g)**: The reaction was carried out according to General Procedure C at 80 °C using alkene **1h** (24.0 mg, 0.1 mmol). The product was purified by preparative TLC (1% EtOAc/toluene) to afford 15 mg (47%) of **4g** as a pale yellow oil. **<sup>1</sup>H NMR** (600 MHz, CDCl<sub>3</sub>) δ 9.65 (s, 1H), 8.90–8.62 (m, 2H), 8.14 (dd, *J* = 8.2, 1.7 Hz, 1H), 7.52 (t, *J* = 7.9 Hz, 1H), 7.48 (dd, *J* = 8.3, 1.5 Hz, 1H), 7.43 (dd, *J* = 8.2, 4.2 Hz, 1H), 7.31 (t, *J* = 7.5 Hz, 2H), 7.24–7.18 (m, 3H), 2.54 (tt, *J* = 10.0, 5.0 Hz, 1H), 2.46–2.31 (m, 2H), 2.26 (dddd, *J* = 13.7, 9.2, 6.8, 4.5 Hz, 1H), 2.01 (dddd, *J* = 14.0, 10.5, 8.6, 5.8 Hz, 1H), 1.86–1.69 (m, 1H), 1.70–1.60 (m, 1H), 0.80 (t, *J* = 7.4 Hz, 3H). **<sup>13</sup>C NMR** (150 MHz, CDCl<sub>3</sub>) δ 171.75, 148.04, 144.64, 138.31, 136.33, 134.55, 128.46, 127.92, 127.88, 127.44, 126.22, 121.55, 121.31, 116.39, 47.35, 36.13, 31.90, 29.97, 12.15. **HRMS** calcd. for C<sub>21</sub>H<sub>23</sub>N<sub>2</sub>O<sup>+</sup> [M+H]<sup>+</sup>: 319.1805, Found: 319.1807.

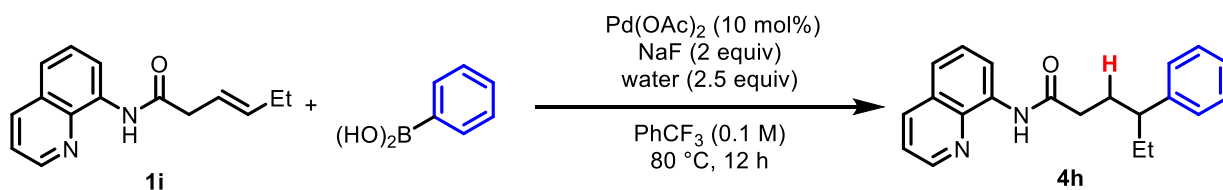

**4-phenyl-*N*-(quinolin-8-yl)hexanamide (4h)**: The reaction was carried out according to General Procedure C at 80 °C using alkene **1i** (24.0 mg, 0.1 mmol). The product was purified by preparative TLC (1% EtOAc/toluene) to afford 17 mg (53%) of **4h** as a yellow oil. Analytical data were in agreement with that of compound **4g**.

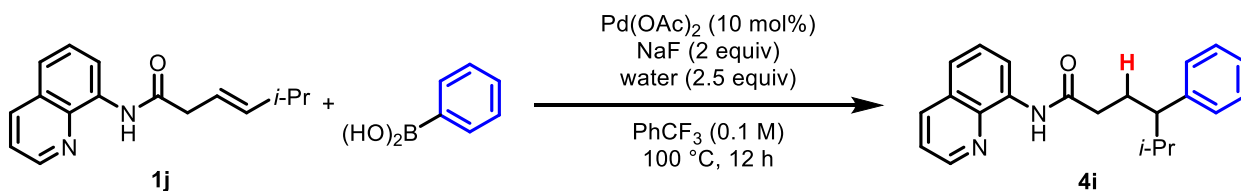

**5-methyl-4-phenyl-*N*-(quinolin-8-yl)hexanamide (4i)**: The reaction was carried out according to General Procedure C using alkene **1j** (24.0 mg, 0.1 mmol). The product was purified by preparative TLC (10% EtOAc/toluene) to afford 14 mg (42%) of **4i** as a yellow oil. **<sup>1</sup>H NMR** (600 MHz, CDCl<sub>3</sub>) δ 9.61 (s, 1H), 8.81–8.72 (m, 2H), 8.14 (dd, *J* = 8.2, 1.7 Hz, 1H), 7.52 (t, *J* = 7.9 Hz, 1H), 7.48 (dd, *J* = 8.3, 1.4 Hz, 1H), 7.43 (dd, *J* = 8.2, 4.2 Hz, 1H), 7.33–7.28 (m, 2H), 7.24–7.19 (m, 1H), 7.19–7.16 (m, 2H), 2.45–2.31 (m, 3H), 2.30–2.22 (m, 1H), 2.08–1.98 (m, 1H), 1.92–1.81 (m, 1H), 1.01 (d, *J* = 6.6 Hz, 3H), 0.75 (d, *J* = 6.7 Hz, 3H). **<sup>13</sup>C NMR** (150 MHz, CDCl<sub>3</sub>) δ 171.98, 148.14, 143.72, 138.43, 136.44, 134.69, 128.70, 128.40, 128.05, 127.57, 126.29, 121.67,

121.41, 116.50, 52.78, 36.54, 33.89, 28.78, 21.09, 20.99. **HRMS** calcd. for  $C_{22}H_{25}N_2O^+$   $[M+H]^+$ : 333.1961, Found: 333.1962.

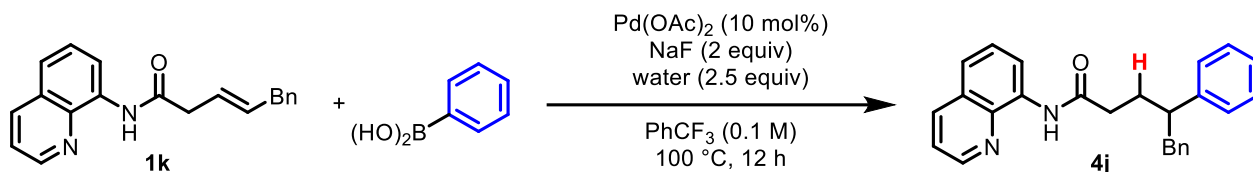

**4,5-diphenyl-N-(quinolin-8-yl)pentanamide (4j)**: The reaction was carried out according to General Procedure C using alkene **1k** (30.2 mg, 0.1 mmol). The product was purified by preparative TLC (5% EtOAc/toluene) to afford 10 mg (26%) of **4j** as a yellow oil.  $^1H$  NMR (600 MHz,  $CDCl_3$ )  $\delta$  9.64 (s, 1H), 8.80–8.73 (m, 2H), 8.17 (dd,  $J$  = 8.2, 1.7 Hz, 1H), 7.57–7.49 (m, 2H), 7.46 (dd,  $J$  = 8.2, 4.3 Hz, 1H), 7.33–7.29 (m, 2H), 7.24–7.19 (m, 5H), 7.17–7.12 (m, 1H), 7.08–7.05 (m, 2H), 3.03–2.94 (m, 3H), 2.47–2.29 (m, 3H), 2.18–2.08 (m, 1H).  $^{13}C$  NMR (150 MHz,  $CDCl_3$ )  $\delta$  171.61, 148.15, 144.02, 140.32, 138.41, 136.45, 134.62, 129.31, 128.62, 128.23, 128.04, 128.02, 127.55, 126.55, 126.01, 121.68, 121.45, 116.50, 47.70, 44.16, 36.23, 31.21. **HRMS** calcd. for  $C_{26}H_{25}N_2O^+$   $[M+H]^+$ : 381.1961, Found: 381.1961.

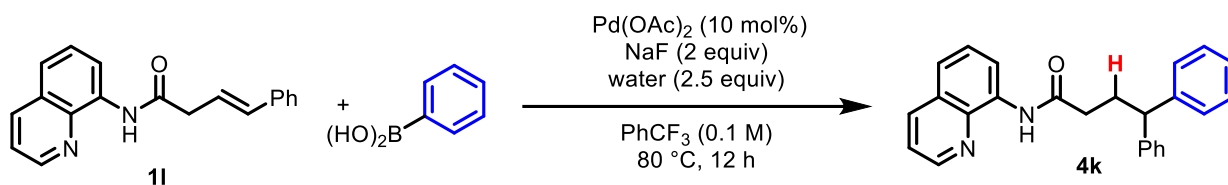

**4,4-diphenyl-N-(quinolin-8-yl)butanamide (4k)**: The reaction was carried out according to General Procedure C at  $80\text{ }^\circ\text{C}$  using alkene **1l** (28.8 mg, 0.1 mmol). The product was purified by mass-directed prep LC. The crude material was purified on a Waters Autopurification LC with a Waters BEH C18 column (19×160 mm, 5 mm) using a 0.1% aqueous formic acid:acetonitrile gradient (30 mL/min, main segment of gradient at 65–95% acetonitrile over 8 min) at ambient temperature. Fractionation was triggered by a Waters QDa single quadrupole mass spec in ESI+ ( $m/z$  = 367.2  $[M+H]^+$ , cone voltage 15V). Purification afforded 29 mg (79 %) of **4k** as a white solid.  $^1H$  NMR (600 MHz,  $CDCl_3$ )  $\delta$  9.73 (s, 1H), 8.83–8.78 (m, 2H), 8.18 (dd,  $J$  = 8.2, 1.7 Hz, 1H), 7.60–7.50 (m, 2H), 7.47 (dd,  $J$  = 8.3, 4.2 Hz, 1H), 7.37–7.30 (m, 8H), 7.22 (tt,  $J$  = 5.7, 2.6 Hz, 2H), 4.09 (t,  $J$  = 7.8 Hz, 1H), 2.65–2.59 (m, 2H), 2.58–2.53 (m, 2H).  $^{13}C$  NMR (150 MHz,  $CDCl_3$ )  $\delta$  171.42, 148.19, 144.40, 138.43, 136.48, 134.63, 128.71, 128.07, 127.57, 126.48, 121.71, 121.52, 116.57, 50.69, 36.45, 31.17. **HRMS** calcd. for  $C_{25}H_{23}N_2O^+$   $[M+H]^+$ : 367.1805, Found: 367.1807.

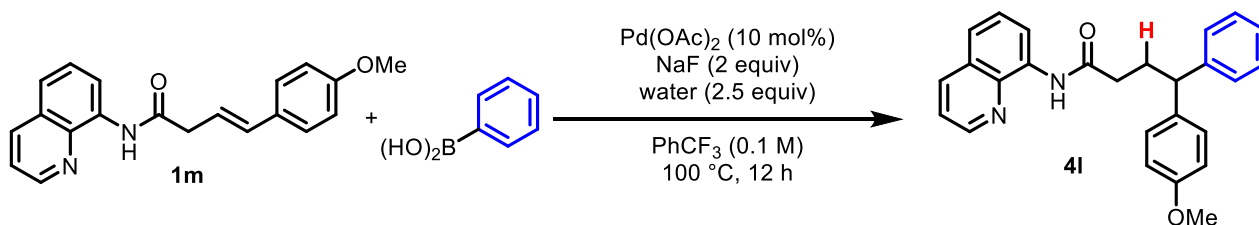

**4-(4-methoxyphenyl)-4-phenyl-N-(quinolin-8-yl)butanamide (4l)**: The reaction was carried out according to General Procedure C using alkene **1m** (31.8 mg, 0.1 mmol). The product was purified by preparative TLC (3% EtOAc/toluene) to afford 30 mg (76%) of **4l** as a pale orange oil.  $^1H$  NMR (500 MHz,  $CDCl_3$ )  $\delta$  9.68 (s, 1H), 8.89–8.64 (m, 2H), 8.14 (dd,  $J$  = 8.3, 1.7 Hz, 1H), 7.52 (t,  $J$  = 7.9 Hz, 1H), 7.48 (dd,  $J$  = 8.3, 1.4 Hz, 1H), 7.43 (dd,  $J$  = 8.2, 4.2 Hz, 1H), 7.28 (d,  $J$  = 4.4 Hz, 4H), 7.23–7.15 (m, 3H), 6.90–6.78 (m, 2H), 4.00 (t,  $J$  = 7.6 Hz, 1H), 3.75 (s, 3H), 2.53 (dtd,  $J$  = 11.9, 8.5, 7.6, 4.0 Hz, 4H).  $^{13}C$  NMR (150 MHz,  $CDCl_3$ )  $\delta$  171.47,



158.16, 148.16, 144.79, 138.39, 136.49, 136.44, 134.60, 128.96, 128.65, 128.03, 127.93, 127.52, 126.36, 121.68, 121.49, 116.53, 114.05, 55.31, 49.81, 36.45, 31.31. **HRMS** calcd. for  $C_{26}H_{25}N_2O_2^+$   $[M+H]^+$ : 397.1916, Found: 397.1914.

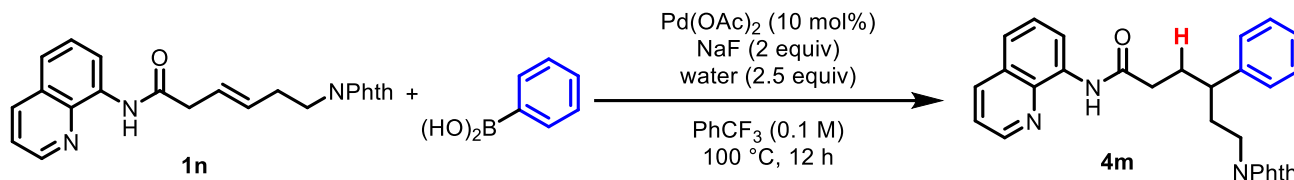

**6-(1,3-dioxoisindolin-2-yl)-4-phenyl-N-(quinolin-8-yl)hexanamide (4m)**: The reaction was carried out according to General Procedure C using alkene **1n** (38.5, 0.1mmol). The product was purified by flash column chromatography (silica, 3% MeCN/DCM) to afford 23 mg (50%) of **4m** as a white solid. **<sup>1</sup>H NMR** (600 MHz,  $\text{CDCl}_3$ )  $\delta$  9.63 (s, 1H), 8.76 (dd,  $J$  = 4.2, 1.7 Hz, 1H), 8.72 (dd,  $J$  = 7.5, 1.6 Hz, 1H), 8.14 (dd,  $J$  = 8.3, 1.7 Hz, 1H), 7.74 (dt,  $J$  = 7.0, 3.5 Hz, 2H), 7.69–7.59 (m, 2H), 7.54–7.45 (m, 2H), 7.43 (dd,  $J$  = 8.2, 4.2 Hz, 1H), 7.29–7.20 (m, 4H), 7.12 (tt,  $J$  = 6.7, 2.0 Hz, 1H), 3.81–3.32 (m, 2H), 2.76 (tt,  $J$  = 10.0, 4.6 Hz, 1H), 2.36 (t,  $J$  = 7.6 Hz, 2H), 2.26 (dtd,  $J$  = 16.0, 8.1, 7.6, 4.6 Hz, 1H), 2.21–2.12 (m, 1H), 2.11–1.98 (m, 2H). **<sup>13</sup>C NMR** (150 MHz,  $\text{CDCl}_3$ )  $\delta$  171.29, 168.25, 148.05, 143.09, 138.28, 136.32, 134.46, 133.70, 132.09, 128.67, 127.91, 127.73, 127.41, 126.55, 123.00, 121.55, 121.35, 116.42, 43.54, 36.73, 35.70, 34.91, 32.61. **HRMS** calcd. for  $C_{29}H_{26}N_3O_3^+$   $[M+H]^+$ : 464.1974, Found: 464.1972.

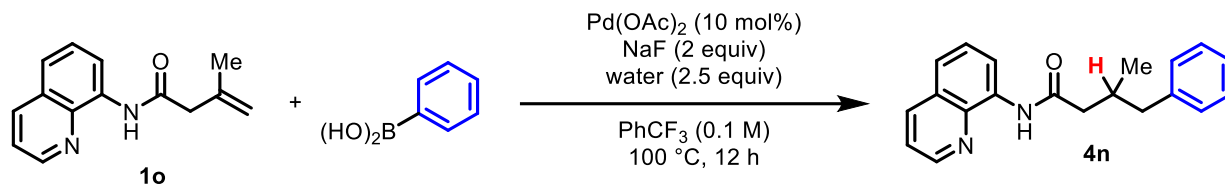

**3-methyl-4-phenyl-N-(quinolin-8-yl)butanamide (4n)**: The reaction was carried out according to General Procedure C using alkene **1o** (22.6 mg, 0.1 mmol). The product was purified by preparative TLC (5% EtOAc/toluene) to afford 12 mg (26%) of **4n** as a yellow oil. **<sup>1</sup>H NMR** (600 MHz,  $\text{CDCl}_3$ )  $\delta$  9.78 (s, 1H), 8.85–8.75 (m, 2H), 8.19–8.14 (m, 1H), 7.57–7.49 (m, 2H), 7.45 (dd,  $J$  = 8.3, 4.2 Hz, 1H), 7.31–7.26 (m, 2H), 7.24–7.16 (m, 3H), 2.79 (dd,  $J$  = 13.4, 6.3 Hz, 1H), 2.62–2.56 (m, 2H), 2.38 (dd,  $J$  = 14.2, 8.0 Hz, 1H), 1.05 (d,  $J$  = 6.5 Hz, 3H). **<sup>13</sup>C NMR** (150 MHz,  $\text{CDCl}_3$ )  $\delta$  171.21, 148.25, 140.46, 138.48, 136.51, 134.63, 129.46, 128.41, 128.08, 127.58, 126.14, 121.72, 121.53, 116.58, 45.19, 43.24, 32.84, 19.78. **HRMS** calcd. for  $C_{20}H_{21}N_2O^+$   $[M+H]^+$ : 305.1648, Found: 305.1649.

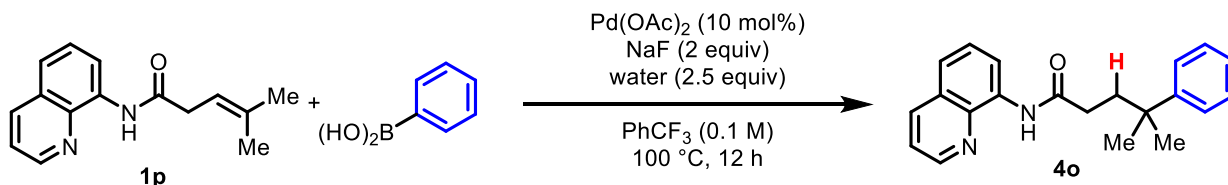

**4,4-dimethyl-4-phenyl-N-(quinolin-8-yl)pentanamide (4o)**: The reaction was carried out according to General Procedure C using alkene **1p** (24.0 mg, 0.1 mmol). The product was purified by preparative TLC (5% EtOAc/toluene) to afford 6 mg (19%) of **4o** as a colorless oil. **<sup>1</sup>H NMR** (600 MHz,  $\text{CDCl}_3$ )  $\delta$  9.63 (s, 1H), 8.89–8.65 (m, 2H), 8.14 (dd,  $J$  = 8.3, 1.7 Hz, 1H), 7.54–7.50 (m, 1H), 7.48 (dd,  $J$  = 8.3, 1.5 Hz, 1H), 7.46–7.39 (m, 3H), 7.37–7.32 (m, 2H), 7.22–7.17 (m, 1H), 2.36–2.28 (m, 2H), 2.22–2.17 (m, 2H), 1.40 (s, 6H). **<sup>13</sup>C NMR** (150 MHz,

$\text{CDCl}_3$ )  $\delta$  171.83, 148.18, 147.97, 138.21, 136.28, 134.48, 128.26, 127.84, 127.37, 125.80, 125.69, 121.47, 121.20, 116.28, 39.23, 37.41, 33.78, 28.95. **HRMS** calcd. for  $\text{C}_{21}\text{H}_{23}\text{N}_2\text{O}^+$   $[\text{M}+\text{H}]^+$ : 319.1805, Found: 319.1807.

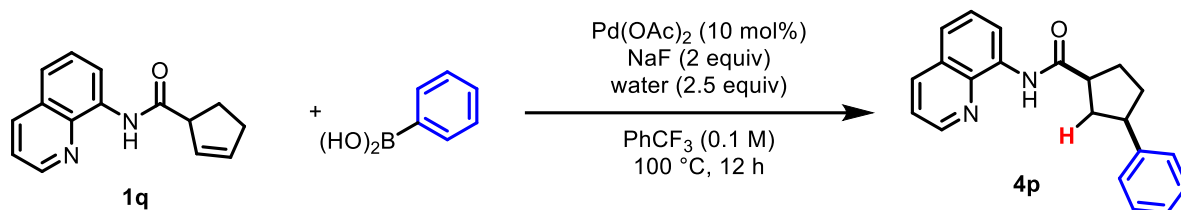

**3-phenyl-*N*-(quinolin-8-yl)cyclopentane-1-carboxamide (4p)**: The reaction was carried out according to General Procedure C using alkene **1q** (23.8 mg, 0.1mmol). The crude material was purified on a Waters Autopurification LC with a Waters BEH C18 column (19×160 mm, 5 mm) using a 0.1% aqueous formic acid:acetonitrile gradient (30 mL/min, main segment of gradient at 65–95% acetonitrile over 8 min) at ambient temperature. Fractionation was triggered by a Waters QDa single quadrupole mass spec in ESI+ ( $m/z$  = 317.2  $[\text{M}+\text{H}]$ , cone voltage 15V). Purification afforded 5 mg (15%) of **4p** as a colorless oil. Relative stereochemistry was established by 2D NMR analysis and by analogy to **4q**.  **$^1\text{H}$  NMR** (600 MHz,  $\text{CDCl}_3$ )  $\delta$  9.90 (s, 1H), 8.93–8.72 (m, 2H), 8.16 (dd,  $J$  = 8.3, 1.7 Hz, 1H), 7.55 (t,  $J$  = 7.9 Hz, 1H), 7.50 (dd,  $J$  = 8.3, 1.4 Hz, 1H), 7.46 (dd,  $J$  = 8.3, 4.2 Hz, 1H), 7.37–7.28 (m, 4H), 7.24–7.17 (m, 1H), 3.24–3.07 (m, 2H), 2.51 (dt,  $J$  = 13.4, 7.1 Hz, 1H), 2.31 (dtd,  $J$  = 13.0, 6.6, 3.9 Hz, 1H), 2.25–2.07 (m, 3H), 1.93 (dddd,  $J$  = 16.0, 13.9, 10.0, 5.9 Hz, 1H).  **$^{13}\text{C}$  NMR** (150 MHz,  $\text{CDCl}_3$ )  $\delta$  174.55, 148.13, 144.60, 138.42, 136.39, 134.68, 128.39, 127.97, 127.48, 127.19, 126.15, 121.58, 121.34, 116.43, 47.19, 46.51, 39.00, 34.17, 29.71. **HRMS** calcd. for  $\text{C}_{21}\text{H}_{21}\text{N}_2\text{O}^+$   $[\text{M}+\text{H}]^+$ : 317.1654, Found: 317.1657.

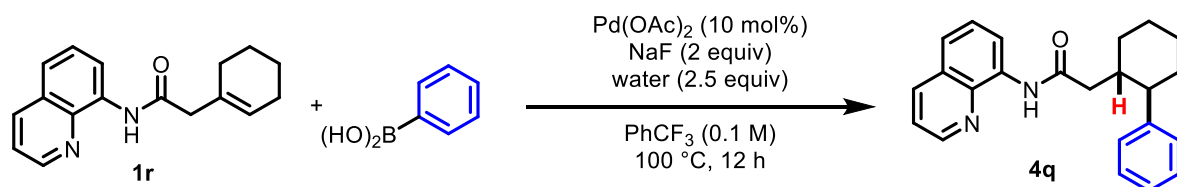

**2-(2-phenylcyclohexyl)-*N*-(quinolin-8-yl)acetamide (4q)**: The reaction was carried out according to General Procedure C using alkene **1r** (26.6 mg, 0.1mmol). The product was purified by mass-directed prep LC. The crude material was purified on a Waters Autopurification LC with a Waters BEH C18 column (19×160 mm, 5 mm) using a 0.1% aqueous formic acid:acetonitrile gradient (30 mL/min, main segment of gradient at 65–95% acetonitrile over 8 min) at ambient temperature. Fractionation was triggered by a Waters QDa single quadrupole mass spec in ESI+ ( $m/z$  = 345.2  $[\text{M}+\text{H}]$ , cone voltage 15V). Purification afforded 11 mg (32%) of **4q** as a colorless oil. Relative stereochemistry was established by 2D NMR analysis.  **$^1\text{H}$  NMR** (600 MHz,  $\text{CDCl}_3$ )  $\delta$  9.59 (s, 1H), 8.78 (dd,  $J$  = 4.2, 1.7 Hz, 1H), 8.72 (dd,  $J$  = 7.4, 1.5 Hz, 1H), 8.13 (dd,  $J$  = 8.3, 1.7 Hz, 1H), 7.54–7.45 (m, 2H), 7.43 (dd,  $J$  = 8.2, 4.2 Hz, 1H), 7.27 (dd,  $J$  = 9.5, 7.3 Hz, 4H), 7.15 (tt,  $J$  = 6.7, 2.0 Hz, 1H), 2.44 (dd,  $J$  = 14.5, 3.4 Hz, 1H), 2.35 (td,  $J$  = 11.4, 3.5 Hz, 1H), 2.32–2.23 (m, 1H), 2.13 (ddd,  $J$  = 13.2, 3.5, 1.7 Hz, 1H), 2.10 (s, 1H), 1.94–1.86 (m, 1H), 1.85–1.75 (m, 2H), 1.61–1.51 (m, 2H), 1.42 (dtt,  $J$  = 28.7, 12.8, 3.4 Hz, 2H), 1.31–1.16 (m, 1H).  **$^{13}\text{C}$  NMR** (150 MHz,  $\text{CDCl}_3$ )  $\delta$  171.37, 148.01, 145.66, 138.26, 136.31, 134.53, 128.61, 127.89, 127.65, 127.42, 126.23, 121.51, 121.22, 116.24, 50.57, 43.47, 40.17, 35.96, 32.83, 26.82, 26.24. **HRMS** calcd. for  $\text{C}_{23}\text{H}_{25}\text{N}_2\text{O}^+$   $[\text{M}+\text{H}]^+$ : 345.1967, Found: 345.1967.

To assign the correct relative stereochemistry of the cyclic products, full 2D NMR analysis was used. First, the benzyl proton was properly assigned in the  $^1\text{H}$  spectrum using HMBC to identify the positive correlation between a phenyl carbon and a  $\text{C}(\text{sp}^3)\text{-H}$  hydrogen. Once the benzyl hydrogen was assigned, we sought to find a positive NOE correlation between it and another proton. If palladium underwent *syn*-insertion, then the two tertiary hydrogens on the ring would be *trans* to each other. Assuming this was the pathway, we should

be able to observe at least one of the following NOEs: 1) NOE between the benzyl proton and the  $\alpha$ -protons of the carbonyl, as they are on the same side of the ring. These are labeled in red for clarity below. 2) NOE between the hydrogens on the *ortho* positions of the phenyl ring and the hydrogen on the  $\beta$ -position of the carbonyl, depending on the orientation of the phenyl ring. Indeed, we are able to observe a strong NOE correlation corresponding to the first interaction.

The same logic was used to assign the relative stereochemistry for compound **4q**. A graphical depiction is shown below.

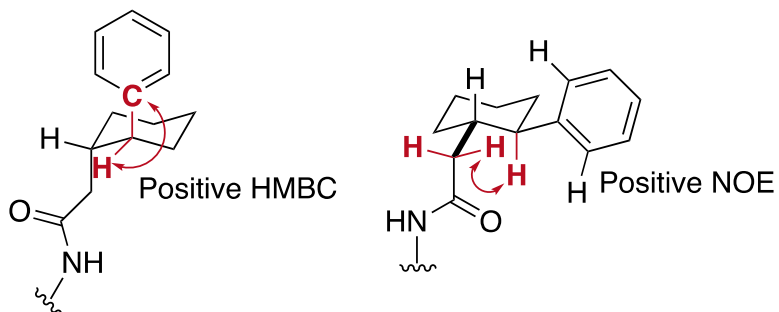

### Large-Scale Synthesis and Deprotection

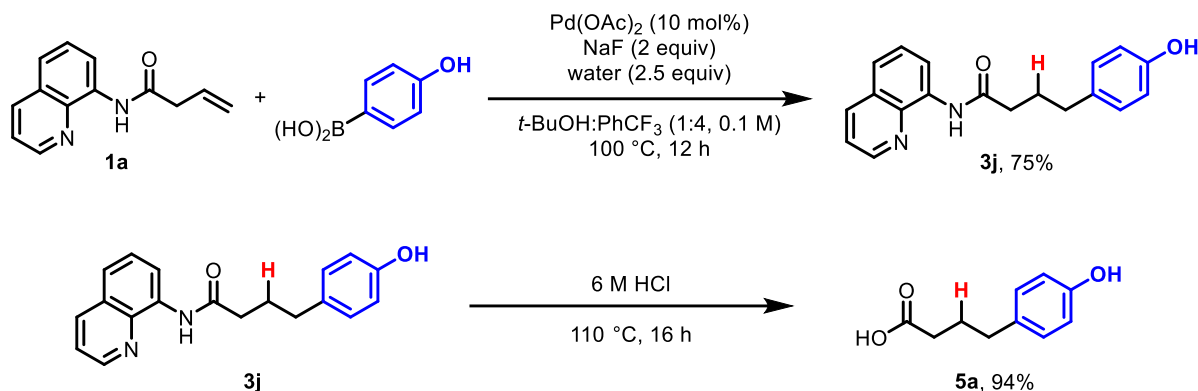

#### Large-Scale Synthesis of 3j

To a 200-mL bomb flask equipped with a magnetic stir bar were added Pd(OAc)<sub>2</sub> (159 mg, 0.71 mmol), **1a** (1.51 g, 7.1 mmol), 4-hydroxyphenylboronic acid (1.959 g, 14.2 mmol), NaF (596.3 mg, 14.2 mmol), water (0.32 mL, 17.75 mmol), *t*-butanol (14.2 mL), and benzotrifluoride (56.8 mL). The flask was sealed and placed in an oil bath that was pre-heated to 100 °C. After 12 h, the reaction was brought to room temperature, filtered through silica, and washed with acetone to elute all organic materials. The filtrate was concentrated by vacuum, re-dissolved in acetone, and columned at 20% EtOAc/hex to yield 1.63 g (75%) of **3j** as an orange-brown solid.

**Large-Scale Deprotection of 3j to prepare 4-(4-hydroxyphenyl)butanoic acid (5a):** To a round bottom flask equipped with a magnetic stir bar were added **3j** (1.40 g, 4.57 mmol) and 6 M HCl (25 mL). The flask was sealed and heated at 110 °C for 16 h. The mixture was then diluted with water, then extracted with EtOAc (×3). The organic layers were combined, dried, and concentrated under vacuum. The solid was triturated with 0 °C EtOAc, decanted, and then recrystallized in acetone through slow evaporation to yield the free acid **5a** as an orange solid. (770 mg, 4.27 mmol). <sup>1</sup>H NMR (600 MHz, (CD<sub>3</sub>)<sub>2</sub>CO) δ 8.06 (s, 1H), 7.10–6.97 (m, 2H), 6.80–6.64 (m, 2H), 2.59–2.52 (m, 2H), 2.29 (t, *J* = 7.4 Hz, 2H), 1.85 (tt, *J* = 8.9, 6.9 Hz, 2H). <sup>13</sup>C NMR (150 MHz, (CD<sub>3</sub>)<sub>2</sub>CO) δ 174.57, 156.43, 133.32, 130.17, 115.98, 34.83, 33.48, 27.81.

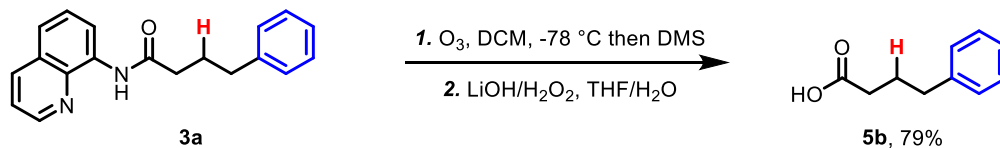

#### Small-Scale Deprotection of 3a to prepare 4-phenylbutanoic acid (5b):

The reaction was carried out according to the procedure by Maulide<sup>7</sup> using **3a** (96 mg, 0.33 mmol), which gave 42 mg (79%) of **5b** as an off-white solid. <sup>1</sup>H NMR (600 MHz, CD<sub>3</sub>Cl) δ 7.34–7.10 (m, 5H), 2.68 (t, *J* = 7.6 Hz, 2H), 2.38 (t, *J* = 7.4 Hz, 2H), 1.97 (p, *J* = 7.5 Hz, 2H). <sup>13</sup>C NMR (150 MHz, CD<sub>3</sub>Cl) δ 179.58, 141.32, 128.62, 128.56, 126.19, 35.13, 33.39, 26.35.

## Procedures for Deuterium Incorporation Studies

To identify the origin of the hydrogen atom in the hydroarylated product, various deuterium incorporation studies were conducted using deuterated reagents. Each reaction was run and purified using a Waters Autopurification LC. Deuterium incorporation was then determined based on high-resolution mass spectrum data and confirmed by  $^1\text{H}$ -NMR and  $^{13}\text{C}$ -NMR. High-resolution mass spectra of non-deuterated compounds are also listed for comparison.

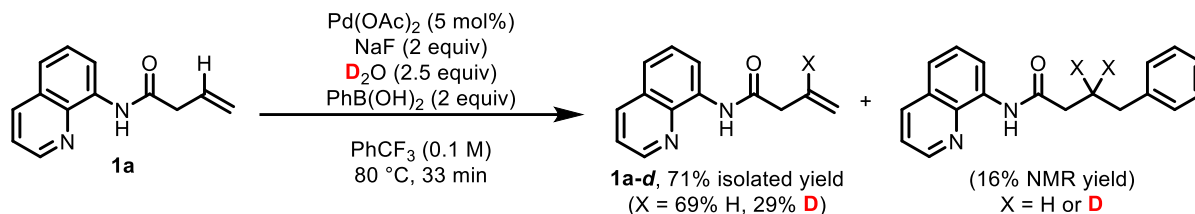

### Deuterium incorporation studies with alkene **1a** and $\text{D}_2\text{O}$ :

To a 1-dram (4 mL) vial equipped with a magnetic stir bar were added  $\text{Pd}(\text{OAc})_2$  (1.1 mg, 0.005 mmol), **1a** (21.2 mg, 0.1 mmol), phenylboronic acid (24.4 mg, 0.2 mmol), NaF (8.4 mg, 0.2 mmol),  $\text{D}_2\text{O}$  (4.5  $\mu\text{L}$ , 0.25 mmol), and benzotrifluoride (1 mL). The vial was sealed with an unpunctured TFE septum-covered screw cap, and placed in a heating block that was pre-heated to  $80\text{ }^\circ\text{C}$ . After 33 min, the reaction was brought to room temperature, filtered through a plug of silica gel, and washed with acetone to elute all organic materials. The filtrate was concentrated by vacuum.  $^1\text{H}$ -NMR analysis of the crude mixture yielded 16% of hydro-or-deutero-arylated product. The crude material was purified on a Waters Autopurification LC with a Waters BEH C18 column (19 $\times$ 160 mm, 5 mm) using a 0.1% aqueous formic acid:acetonitrile gradient (30 mL/min, main segment of gradient at 35–55% acetonitrile over 8 min) at ambient temperature. Fractionation was triggered by a Waters QDa single quadrupole mass spec in ESI+ ( $m/z = 213.1$  [ $\text{M}+\text{H}$ ], cone voltage 15V). Purification afforded 15 mg (71%) of **1a-d** as an off-white solid. The isotopic distribution of labeled (**1a-d**) and unlabeled (**1a**) compounds was determined by obtaining a high-resolution mass spectrum on an LC-TOF (Waters I-Class LC and Waters G2-XS TOF running in ESI+ mode) and processing the continuum data using Cerno Massworks 5.0.<sup>8</sup>

**Figure S3.** HRMS data for **1a-d**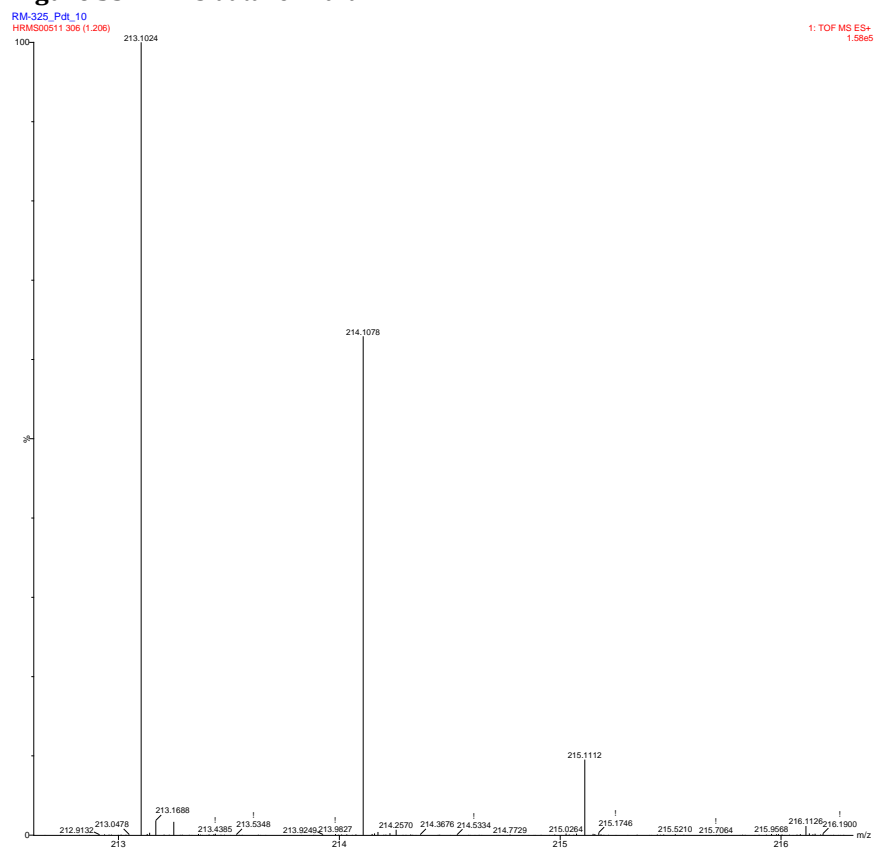**Mixture Results:**0.693  $C_{13}H_{13}N_2O$ 0.290  $C_{13}H_{12}N_2O[{}^2H]$ 0.017  $C_{13}H_{11}N_2O[{}^2H]_2$ 

Overall Mass Error (mDa): -4.0231

**Figure S4.** HRMS data for **1a**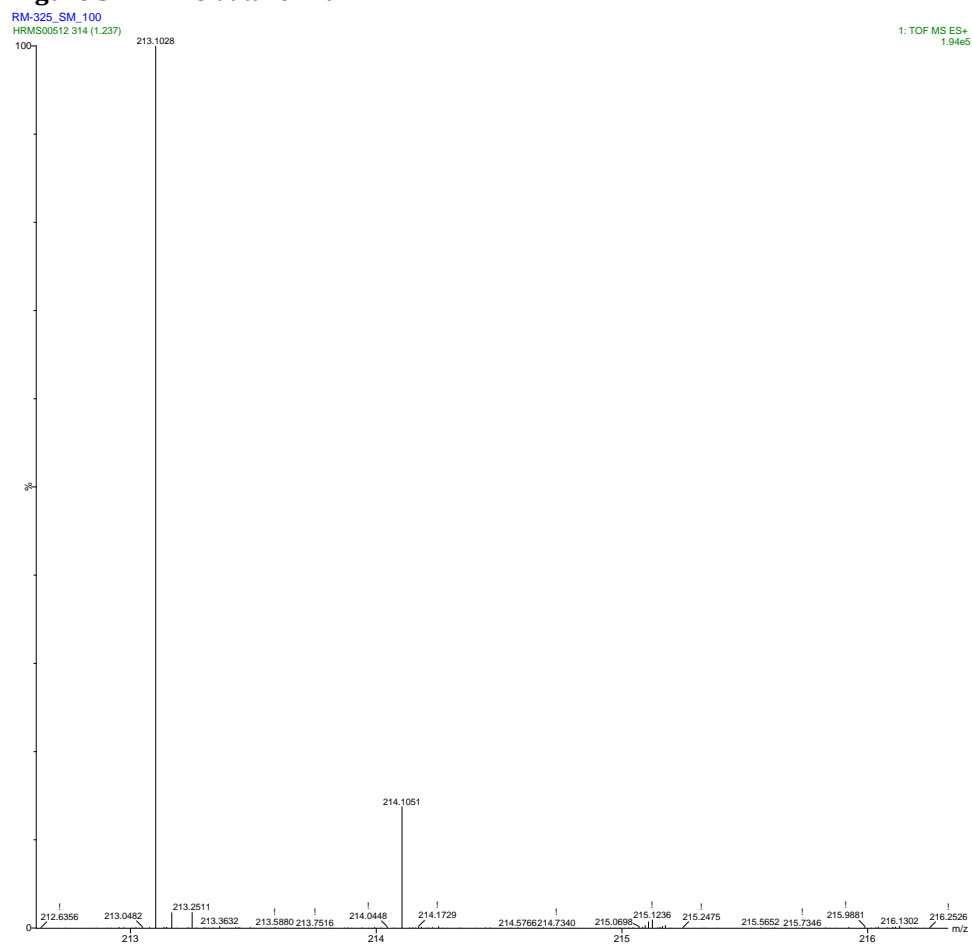**Mixture Results:**1.000 C<sub>13</sub>H<sub>13</sub>N<sub>2</sub>O-0.008 C<sub>13</sub>H<sub>12</sub>N<sub>2</sub>O[<sup>2</sup>H]0.008 C<sub>13</sub>H<sub>11</sub>N<sub>2</sub>O[<sup>2</sup>H]<sub>2</sub>

Overall Mass Error (mDa): 2.8968

**Figure S5.**  $^1\text{H-NMR}$  spectra for **1a-d**

RM-325-pure.1.fid

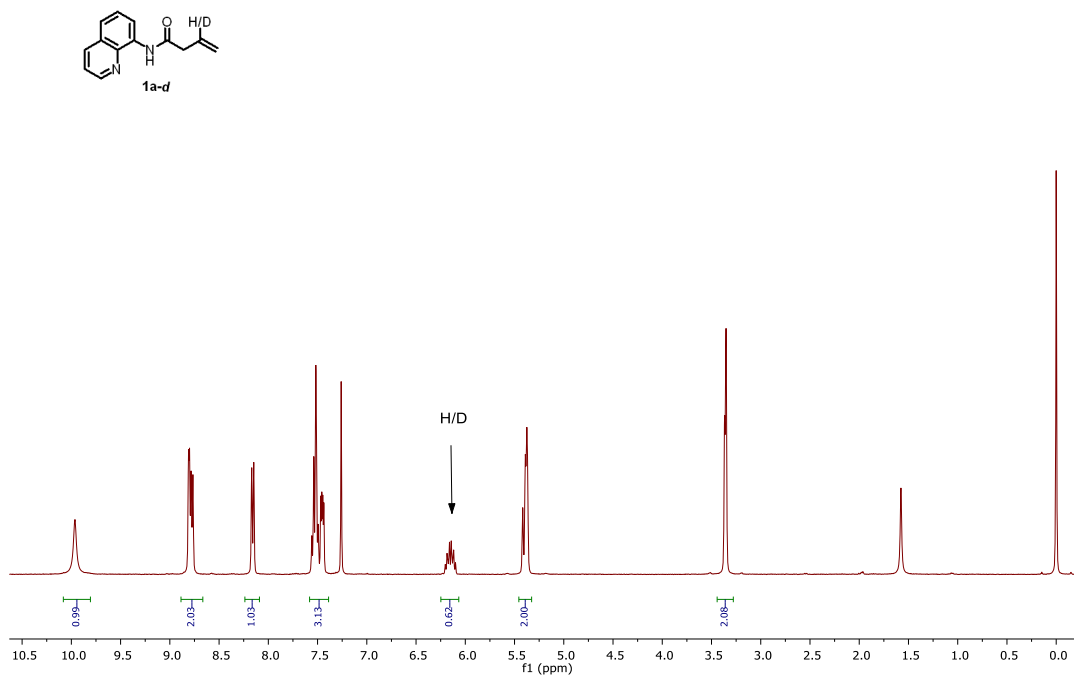**Figure S6.**  $^{13}\text{C-NMR}$  spectra for **1a-d**

RM-325-pure.2.fid

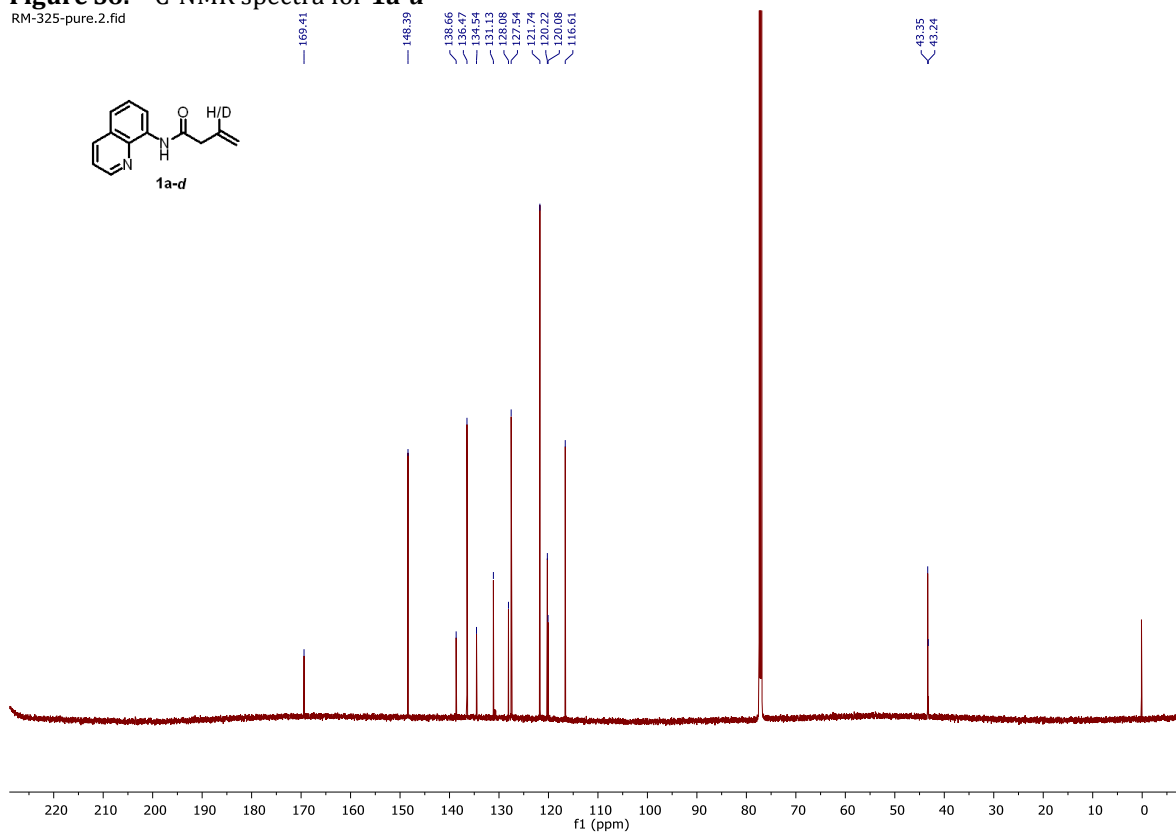



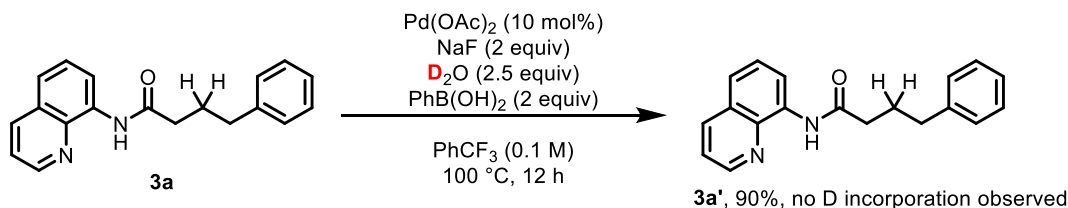

### Deuterium incorporation studies with hydroarylation product **3a** and D<sub>2</sub>O:

To a 1-dram (4 mL) vial equipped with a magnetic stir bar were added Pd(OAc)<sub>2</sub> (2.2 mg, 0.01 mmol), **3a** (29.0 mg, 0.1 mmol), phenylboronic acid (24.4 mg, 0.2 mmol), NaF (8.4 mg, 0.2 mmol), D<sub>2</sub>O (4.5 μL, 0.25 mmol), and benzotrifluoride (1 mL). The vial was sealed with an unpunctured TFE septum-covered screw cap, and placed in a heating block that was pre-heated to 100 °C. After 12 hours, the reaction was brought to room temperature, filtered through a plug of silica gel, and washed with acetone to elute all organic materials. The filtrate was concentrated by vacuum. The crude material was purified on a Waters Autopurification LC with a Waters BEH C18 column (19×160 mm, 5 mm) using a 0.1% aqueous formic acid:acetonitrile gradient (30 mL/min, main segment of gradient at 55–75% acetonitrile over 8 min) at ambient temperature. Fractionation was triggered by a Waters QDa single quadrupole mass spec in ESI+ (m/z = 291.1 [M+H], cone voltage 15V). Purification afforded 26 mg (90%) of **3a'** as an off-white solid. The isotopic distribution of **3a** and **3a'** was determined by obtaining a high-resolution mass spectrum on an LC-TOF (Waters I-Class LC and Waters G2-XS TOF running in ESI+ mode) and processing the continuum data using Cerno Massworks 5.0.<sup>8</sup>

**Figure S7.** HRMS data for **3a**

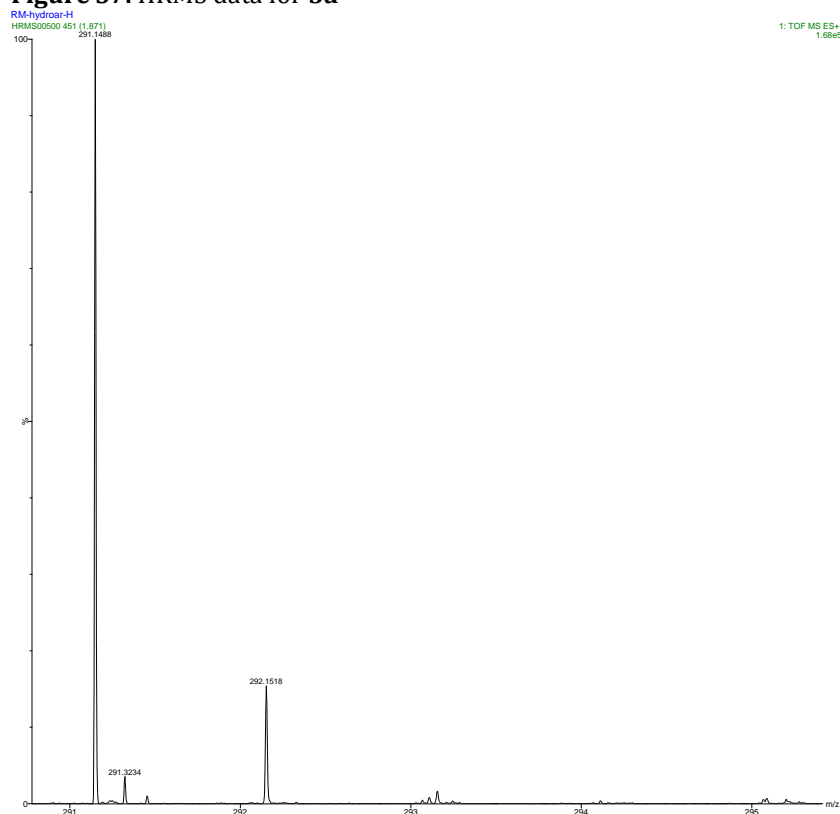

Mixture Results:

1.013 C<sub>19</sub>H<sub>19</sub>N<sub>2</sub>O

-0.008 C<sub>19</sub>H<sub>18</sub>N<sub>2</sub>O[<sup>2</sup>H]

-0.004 C<sub>19</sub>H<sub>17</sub>N<sub>2</sub>O[<sup>2</sup>H]<sub>2</sub>

-0.001 C<sub>19</sub>H<sub>16</sub>N<sub>2</sub>O[<sup>2</sup>H]<sub>3</sub>

Overall Mass Error (mDa): 1.1390

**Figure S8.** HRMS data for **3a'**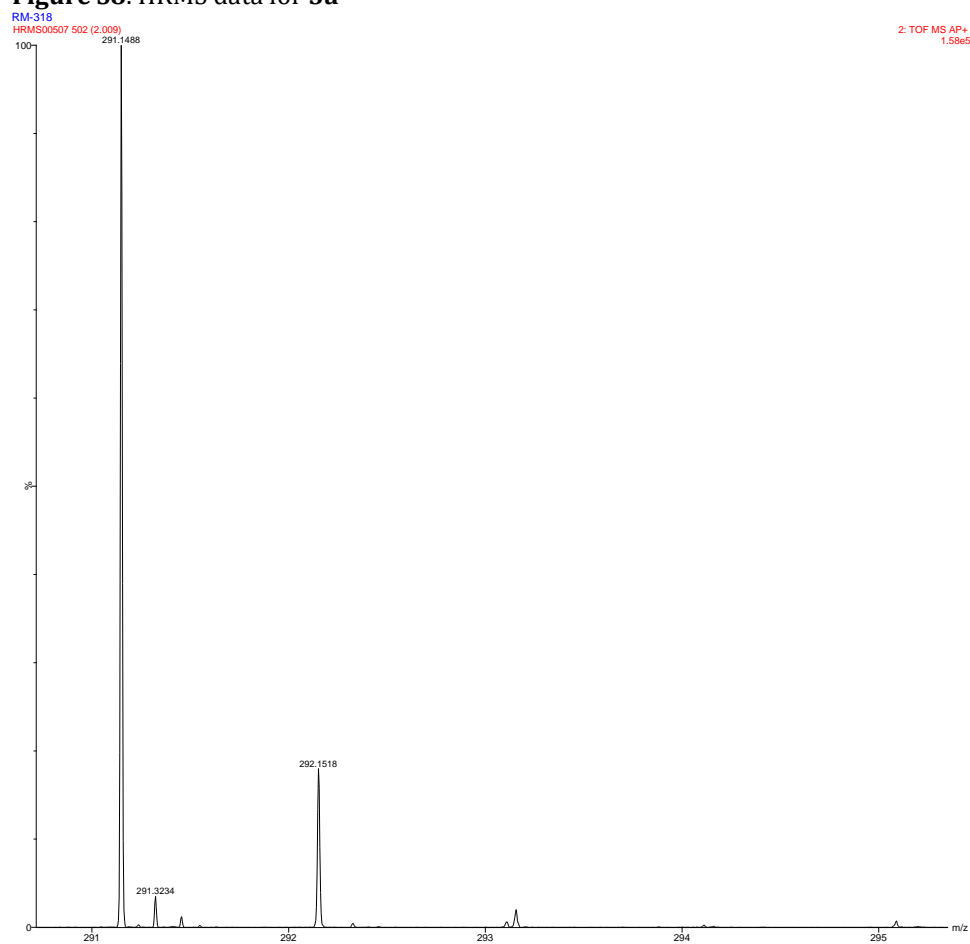**Mixture Results:**1.008 C<sub>19</sub>H<sub>19</sub>N<sub>2</sub>O-0.002 C<sub>19</sub>H<sub>18</sub>N<sub>2</sub>O[<sup>2</sup>H]-0.002 C<sub>19</sub>H<sub>17</sub>N<sub>2</sub>O[<sup>2</sup>H]<sub>2</sub>-0.004 C<sub>19</sub>H<sub>16</sub>N<sub>2</sub>O[<sup>2</sup>H]<sub>3</sub>

Overall Mass Error (mDa): 0.3230

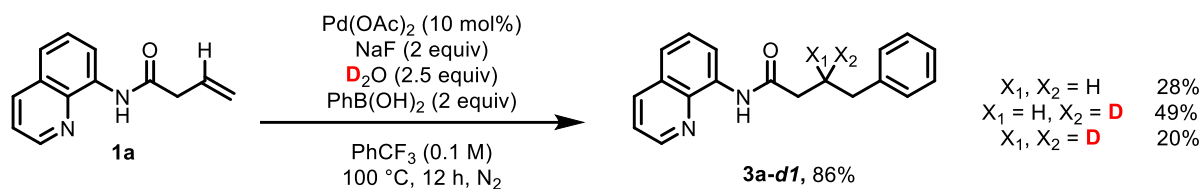

**Deuterium incorporation studies with D<sub>2</sub>O in reaction conditions:** In a 1-dram (4 mL) vial equipped with a magnetic stir bar were added Pd(OAc)<sub>2</sub> (2.2 mg, 0.01 mmol), alkene **1a** (21.2 mg, 0.1 mmol), phenylboronic acid (24.4 mg, 0.2 mmol), and NaF (8.4 mg, 0.2 mmol). The vial was placed on a lyophilizer overnight to dry. The vial was then sealed with an unpunctured TFE septum-covered screw cap, then evacuated and backfilled with nitrogen (×3). D<sub>2</sub>O (4.5 μL, 0.25 mmol) and benzotrifluoride dried over 4 Å molecular sieves (1 mL) were then added to the vial, and the punctured septum was sealed with grease. The vial was then placed in a heating block that was pre-heated to 100 °C. After 12 h, the reaction was brought to room temperature, filtered through a plug of silica gel, and washed with acetone to elute all organic materials. The filtrate was concentrated by vacuum, re-dissolved in acetone, and separated by preparative TLC (1% EtOAc/toluene) to afford 25 mg (86%) of **3a-d1** as a pale orange oil. The isotopic distribution of **3a-d1** was determined by obtaining a high-resolution mass spectrum on an LC-TOF (Waters I-Class LC and Waters G2-XS TOF running in ESI+ mode) and processing the continuum data using Cerno Massworks 5.0.<sup>8</sup>

**Figure S9.** HRMS data for **3a-d1**.

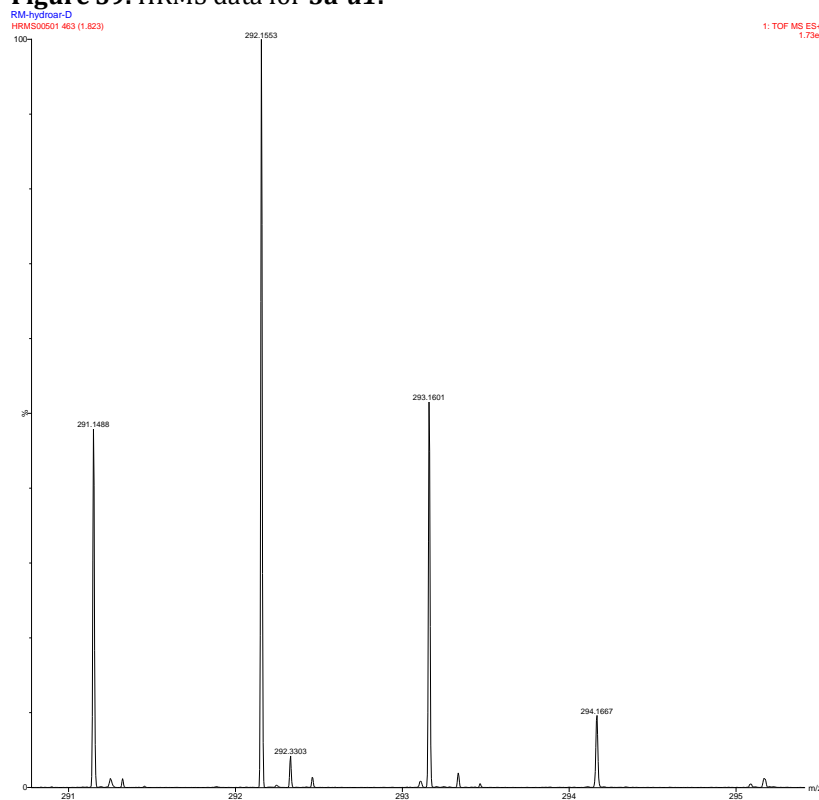

**Mixture Results:**

0.279 C<sub>19</sub>H<sub>19</sub>N<sub>2</sub>O

0.491 C<sub>19</sub>H<sub>18</sub>N<sub>2</sub>O[<sup>2</sup>H]

0.200 C<sub>19</sub>H<sub>17</sub>N<sub>2</sub>O[<sup>2</sup>H]<sub>2</sub>

0.030 C<sub>19</sub>H<sub>16</sub>N<sub>2</sub>O[<sup>2</sup>H]<sub>3</sub>

Overall Mass Error (mDa): 0.2615

**Figure S10.**  $^1\text{H-NMR}$  spectra for **3a-d1**

RM-282b-1.1.fid

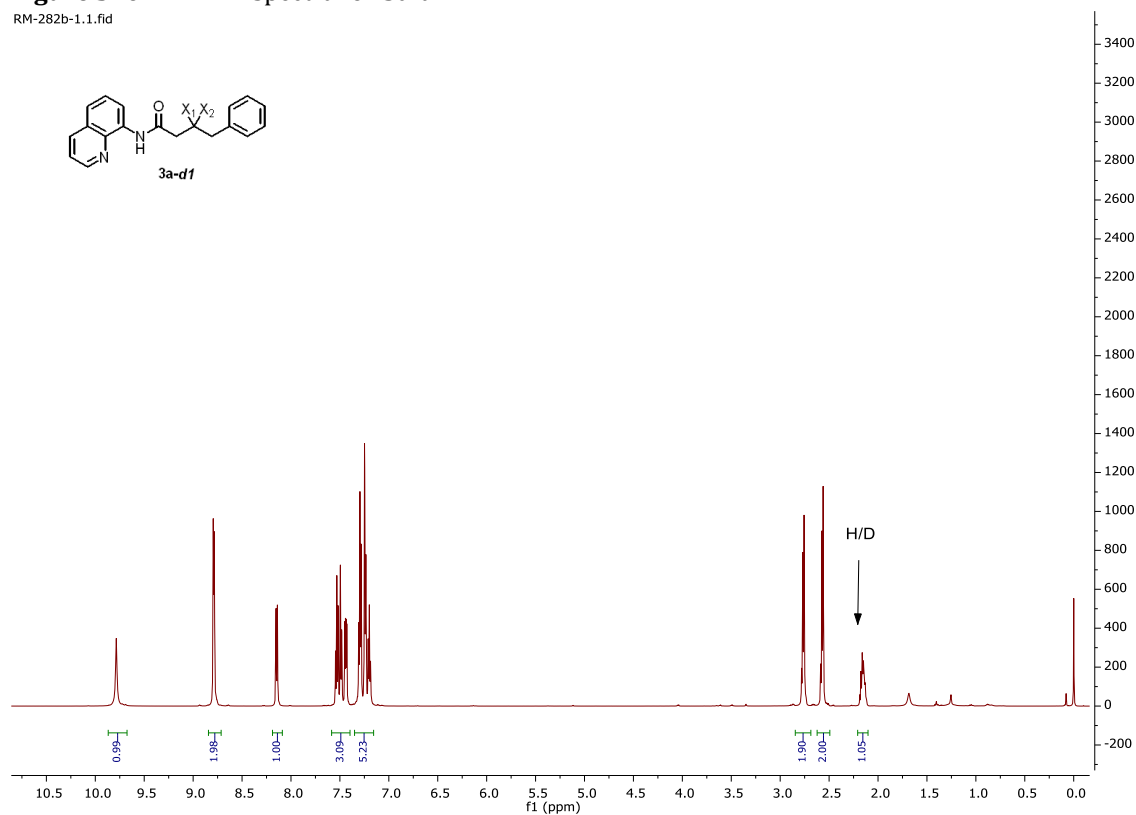**Figure S11.**  $^{13}\text{C-NMR}$  spectra for **3a-d1**

RM-282b-2.2.fid

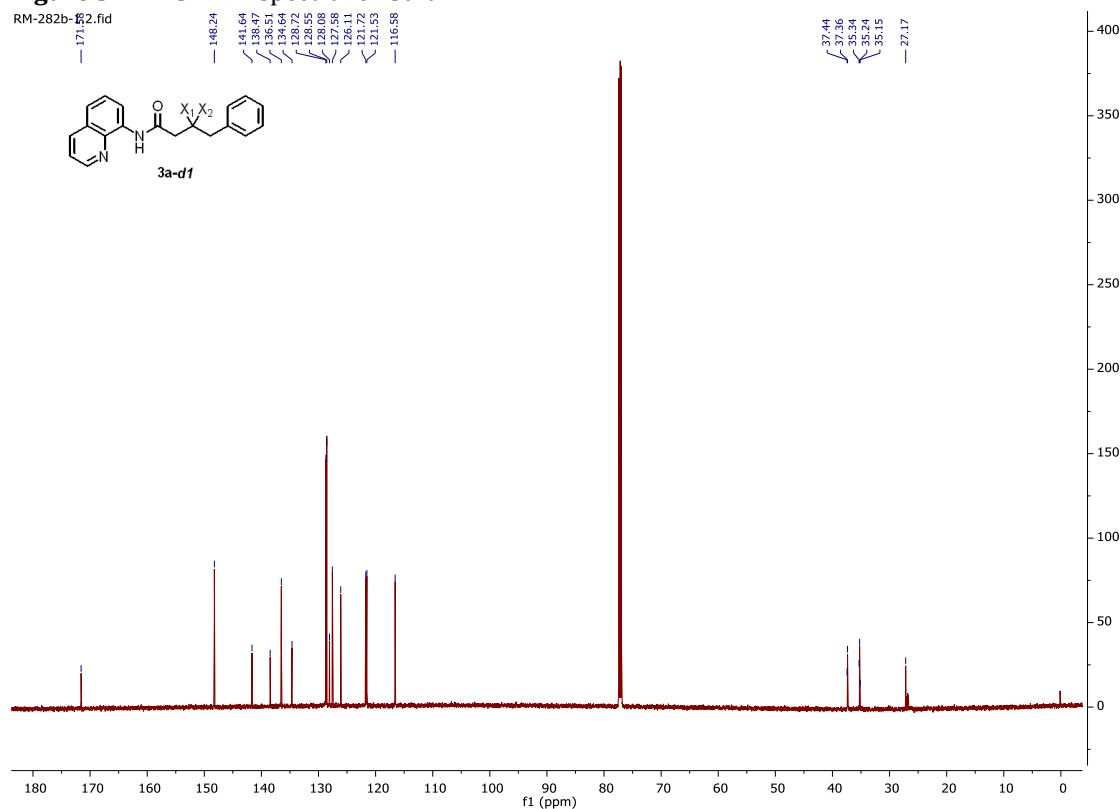

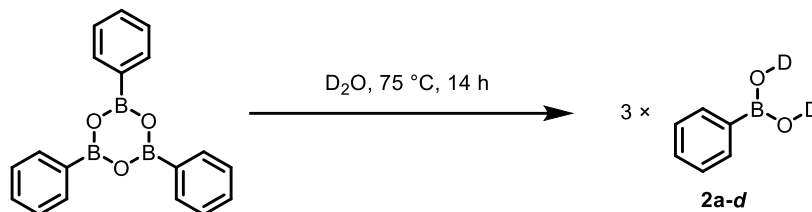

***d*<sup>2</sup>-phenylboronic acid (**2a-d**):** This reaction was carried out based on a procedure reported by Hou with slight modifications.<sup>9</sup> Triphenylboroxine was synthesized according to the procedure by Hayashi.<sup>10</sup> In a flame-dried 1-dram (4 mL) vial equipped with a magnetic stir bar were added triphenylboroxine (160 mg, 0.51 mmol) and D<sub>2</sub>O (1.8 mL, 0.28 M). The vial was then sealed with an unpunctured TFE septum-covered screw cap, then placed in a heating block that was pre-heated to 75 °C. After 14 h, the reaction was filtered while it was still hot to remove any excess triphenylboroxine. The filtrate was then cooled to room temperature, and a white solid crashed out of solution. After filtration, the solid was dried under vacuum for 4 hours to yield 88 mg (46%) of **2a-d** as a white solid (84% D), containing 9 mol% triphenylboroxine. <sup>1</sup>H NMR (600 MHz, (CD<sub>3</sub>)<sub>2</sub>SO) δ 8.02 (s, 0.16H), 7.87 (s, 0.26 H), 7.78 (d, *J* = 7.1 Hz, 2H), 7.49–7.08 (m, 3H).

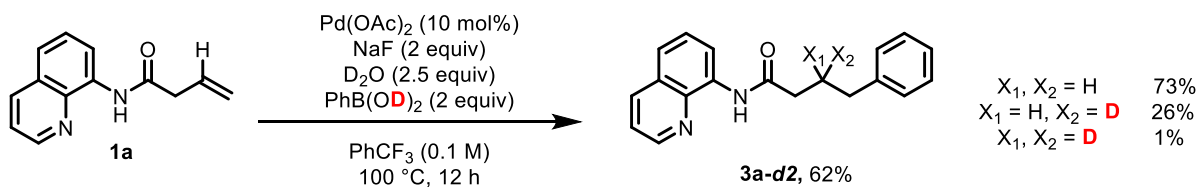

**Deuterium incorporation studies with PhB(OD)<sub>2</sub> in reaction conditions:** In a 1-dram (4 mL) vial equipped with a magnetic stir bar were added Pd(OAc)<sub>2</sub> (2.2 mg, 0.01 mmol), alkene **1a** (21.2 mg, 0.1 mmol), **2a-d** (24.8 mg, 0.2 mmol), and NaF (8.4 mg, 0.2 mmol). The vial was then sealed with an unpunctured TFE septum-covered screw cap. H<sub>2</sub>O (4.5 μL, 0.25 mmol) and benzotrifluoride dried over 4 Å molecular sieves (1 mL) were then added to the vial. The vial was then placed in a heating block that was pre-heated to 100 °C. After 12 h, the reaction was brought to room temperature, filtered through a plug of silica gel, and washed with acetone to elute all organic materials. The crude material was purified on a Waters Autopurification LC with a Waters BEH C18 column (19×160 mm, 5 mm) using a 0.1% aqueous formic acid:acetonitrile gradient (30 mL/min, main segment of gradient at 55–75% acetonitrile over 8 min) at ambient temperature. Fractionation was triggered by a Waters QDa single quadrupole mass spec in ESI+ (*m/z* = 291.1 [M+H]), cone voltage 15V). Purification afforded 18 mg (62%) of **3a-d2** as an off-white solid. The isotopic distribution of **3a-d2** was determined by obtaining a high-resolution mass spectrum on an LC-TOF (Waters I-Class LC and Waters G2-XS TOF running in ESI+ mode) and processing the continuum data using Cerno Massworks 5.0.<sup>8</sup>

**Figure S12. HRMS data for 3a-d2**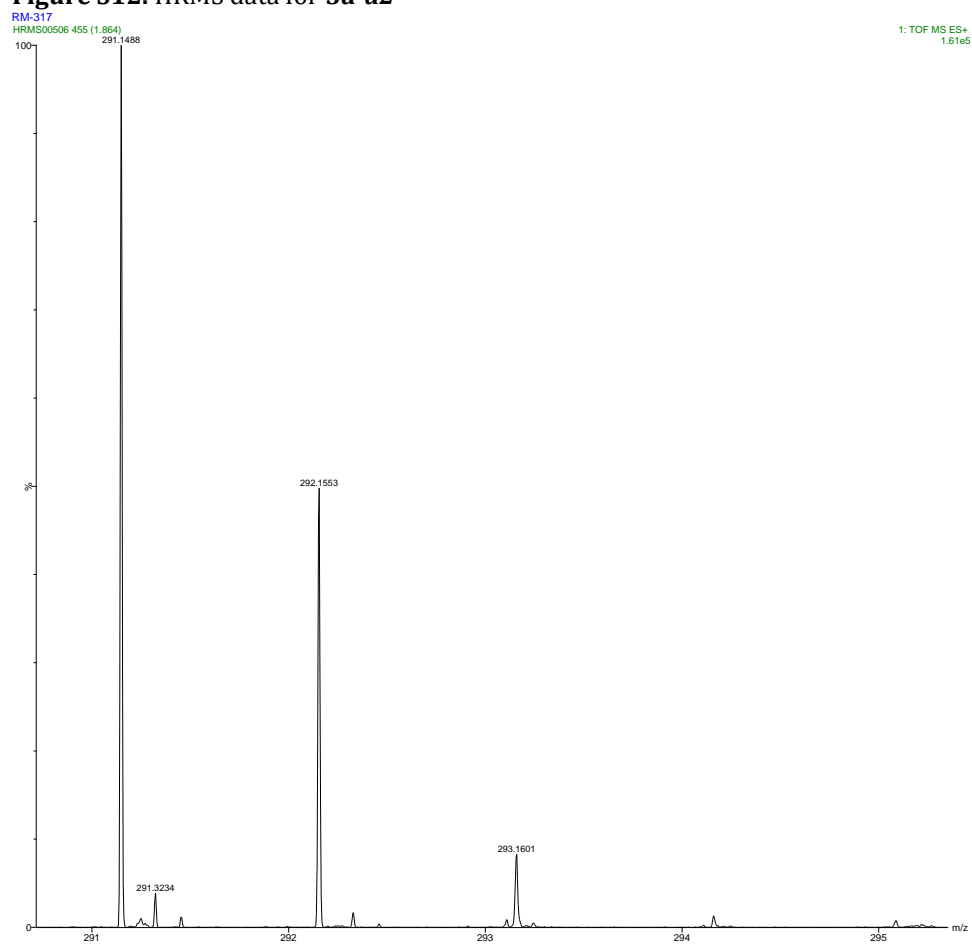**Mixture Results:**0.731 C<sub>19</sub>H<sub>19</sub>N<sub>2</sub>O0.260 C<sub>19</sub>H<sub>18</sub>N<sub>2</sub>O[<sup>2</sup>H]0.009 C<sub>19</sub>H<sub>17</sub>N<sub>2</sub>O[<sup>2</sup>H]<sub>2</sub>0.001 C<sub>19</sub>H<sub>16</sub>N<sub>2</sub>O[<sup>2</sup>H]<sub>3</sub>

Overall Mass Error (mDa): 0.3147

**Figure S13.**  $^1\text{H-NMR}$  spectra for **3a-d2**

RM-317-pure.1.fid

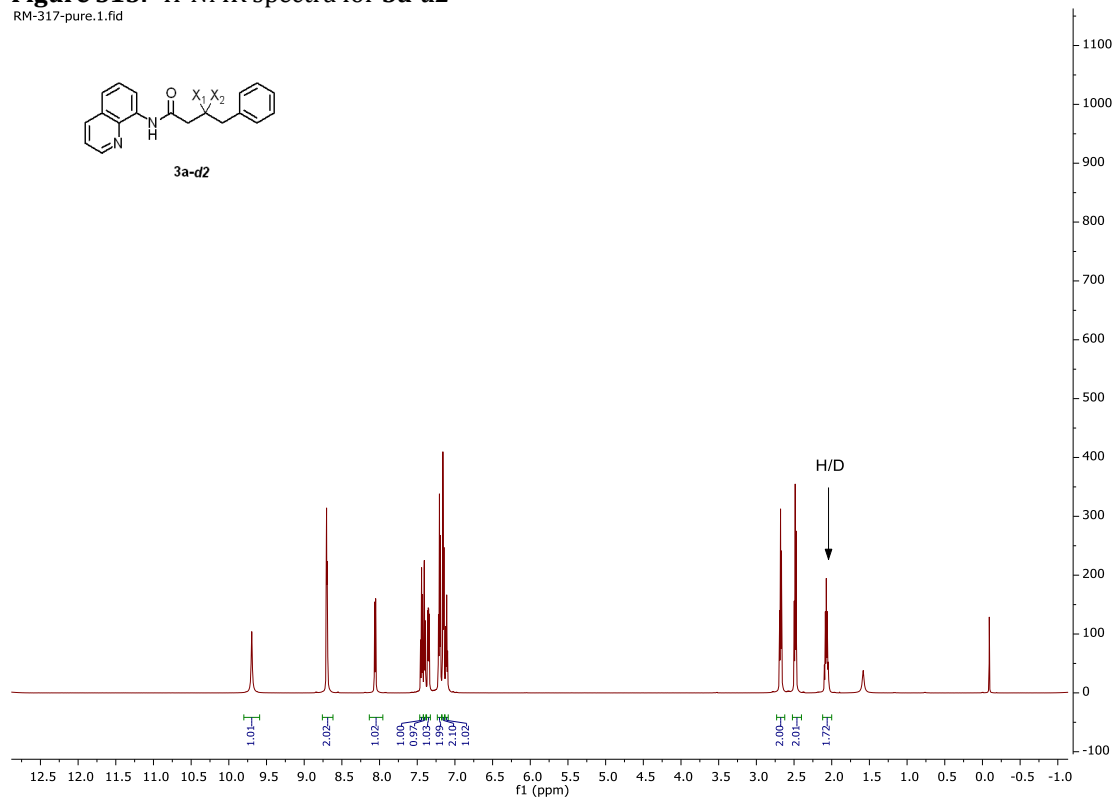**Figure S14.**  $^{13}\text{C-NMR}$  spectra for **3a-d2**

RM-317-pure.2.fid

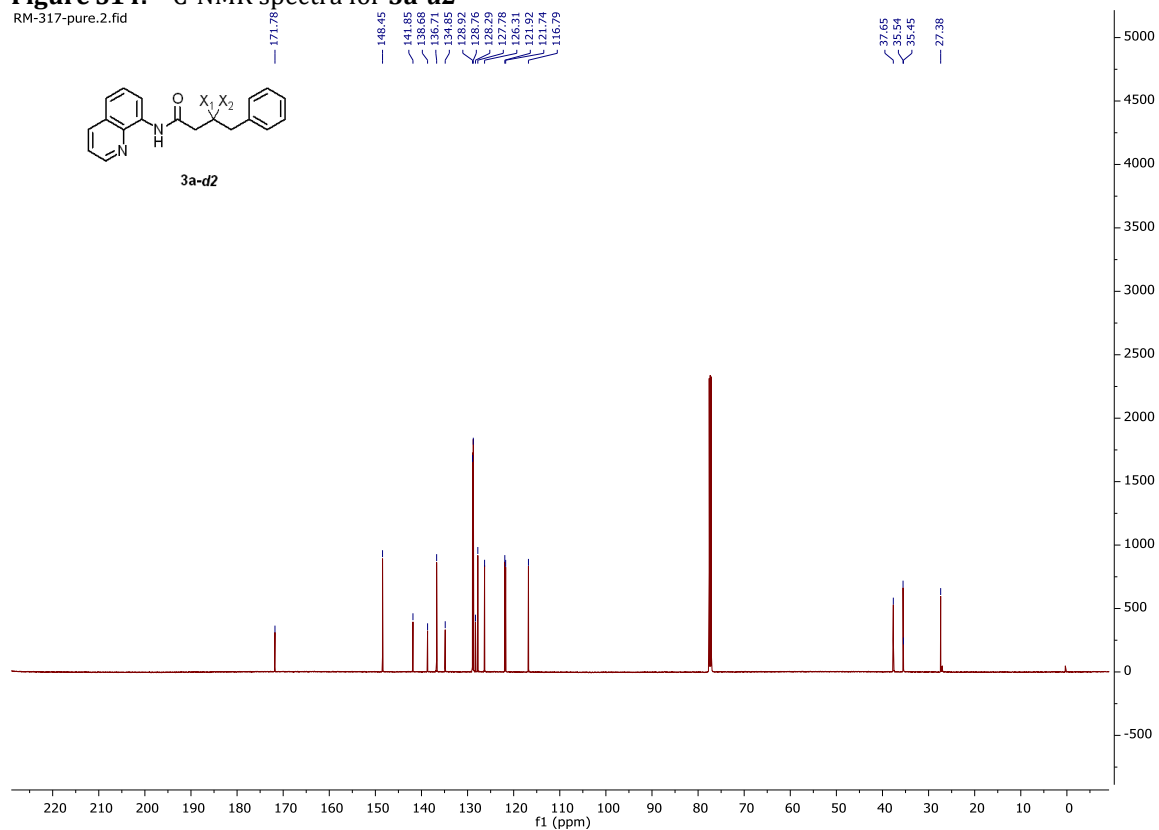

## General Procedure For Kinetic Experiments

Unless specified otherwise, kinetic experiments were conducted as follows.

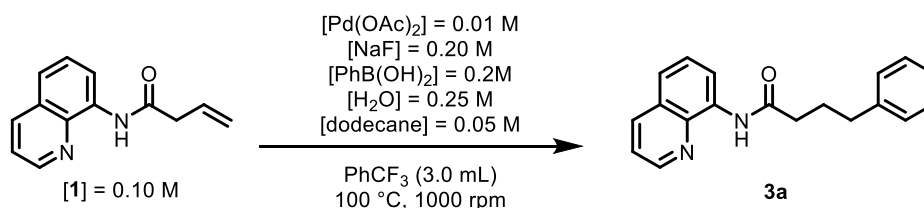

**General Kinetic Procedure:** To a 2-Dram glass vial with screw cap septum was added phenylboronic acid (73.16 mg, 0.60 mmol) and sodium fluoride (25.19 mg, 0.60 mmol). **1** (212.25 mg, 1.00 mmol), palladium acetate (22.45 mg, 0.10 mmol), and dodecane (85.17 mg, 0.50 mmol) were added to a 10-mL volumetric flask and dissolved in benzotrifluoride using heat and sonication. Once solids had dissolved, the flask was cooled down to room temperature, and benzotrifluoride was further added as necessary to prepare a 10 mL stock solution of palladium acetate (0.01 M) and **1** (0.1 M). 3 mL of this stock solution was added to the vial using a 5 mL volumetric syringe. The cap was then taped shut with electrical tape. The reaction was then started by adding water (13.52  $\mu\text{L}$ , 0.075 mmol) using a 50  $\mu\text{L}$  microsyringe to the vial and immediately placing it into a heating block that was pre-heated to 100  $^\circ\text{C}$  with a stir rate of 1000 rpm. This was considered  $t=0$  min for the kinetic time course.

Reaction progress was monitored by removing an aliquot ( $\sim 15 \mu\text{L}$ ) from the reaction mixture. Each aliquot was acquired using a new syringe (1 mL) and new hypodermic needle. Each aliquot was quenched by injection into a 1-Dram glass vial containing ethyl acetate (1 mL), dried over sodium sulfate, and analyzed by gas chromatography equipped with a flame ionization detector.



## Analysis by Gas Chromatography with Flame Ionization Detection

For gas chromatography-flame ionization detection analysis, helium was used as the carrier gas, with a constant flow rate of 6.0 mL/min. The oven temperature program started at 150 °C, was raised to 171 °C at a rate of 14 °C/min, then was raised to 280 °C at 30 °C/min, and subsequently was raised to 300 °C at 20 °C/min and held at 300 °C for two minutes. The temperature of the detector and injector was held at 350 °C and 350 °C respectively. The retention time for each compound of interest is listed below.

**Figure S15.** GC-FID of **1** with  $t_R = 3.44$  min.

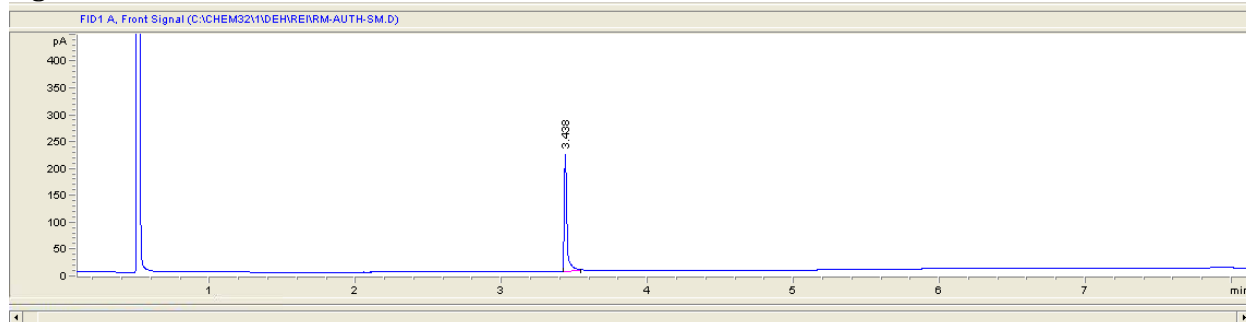

**Figure S16.** GC-FID of **3a** with  $t_R = 5.72$  min.

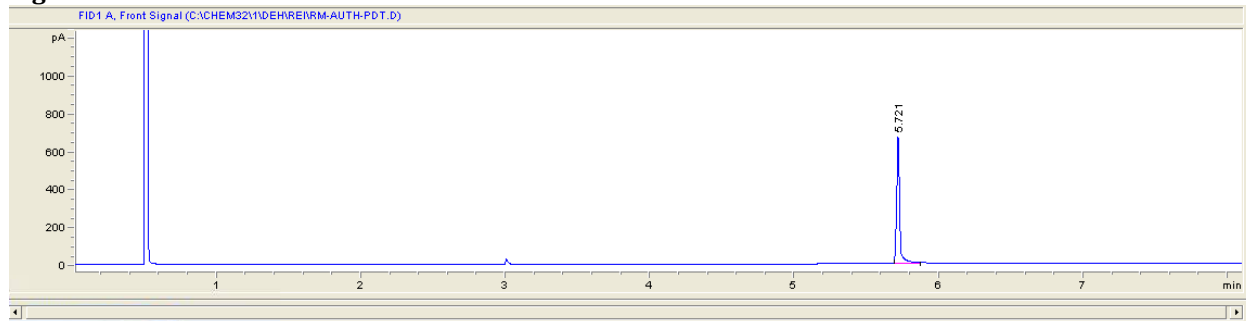

**Figure S17.** GC-FID of dodecane with  $t_R = 0.814$  min.

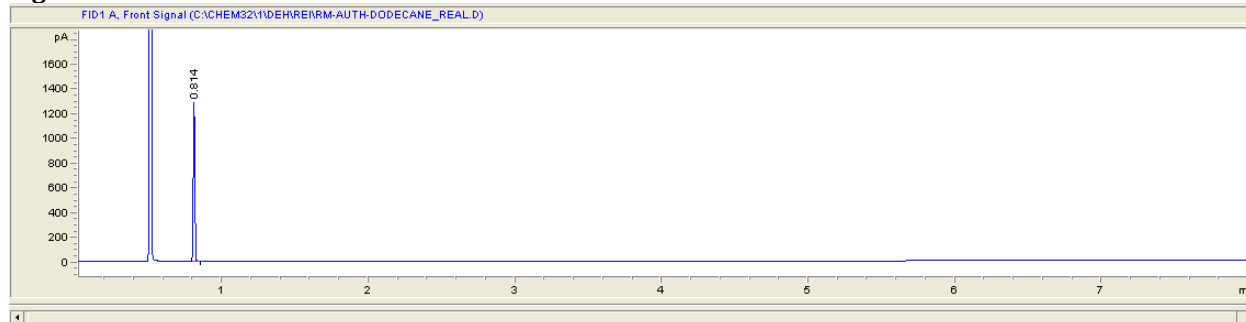

**Figure S18.** GC-FID of biphenyl with  $t_R = 1.25$  min.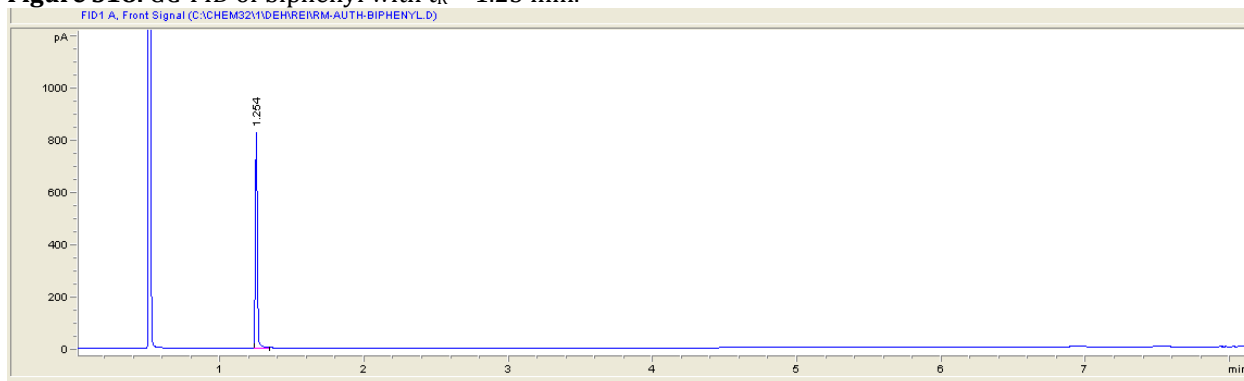**Figure S19.** GC-FID of a running reaction as described in General Procedure D.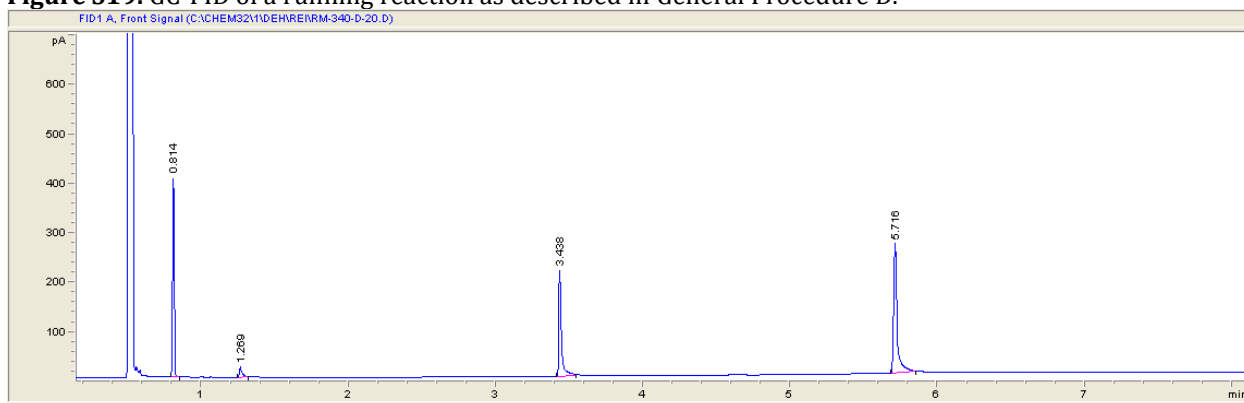

## Kinetic Data

The procedures and results for the kinetic experiments are as follows.

### Same Excess Experiment

Same excess studies were completed using General Kinetic Procedure, with the following variations:

| Experiment | [1] (M) | [2a] (M) | [3a] (M) |
|------------|---------|----------|----------|
| SameXS-A   | 0.100   | 0.200    | 0        |
| SameXS-B   | 0.075   | 0.175    | 0        |
| SameXS-C   | 0.075   | 0.175    | 0.025    |

B and C were both time-adjusted by 7.5 minutes in Figure S20.

**Figure S20:** Kinetic profile for experiments performed at same excess

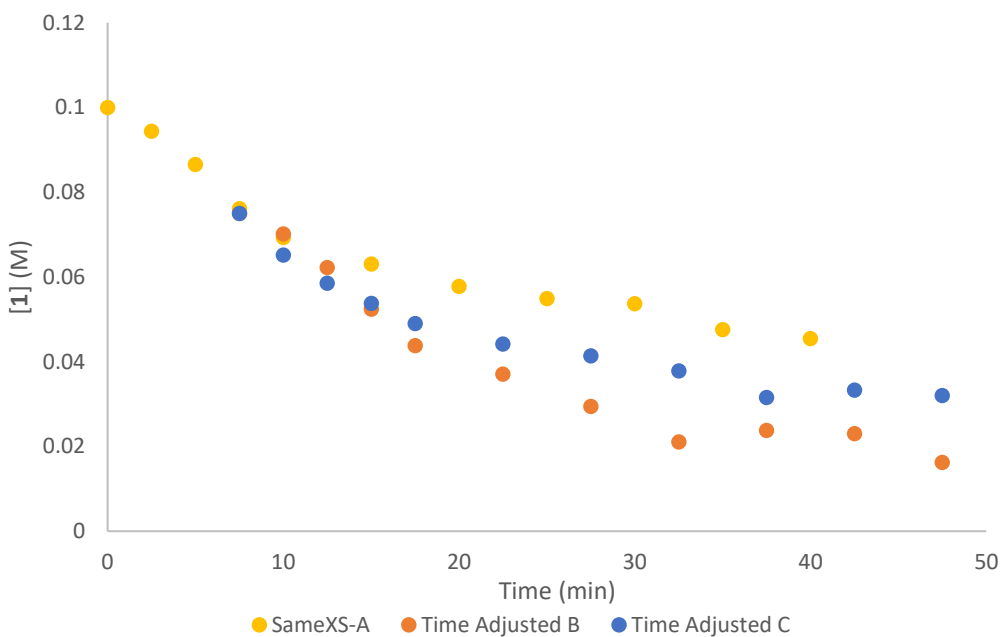

### Different Excess Experiments

Different excess studies were completed using General Kinetic Procedure, with the following variations:

| Experiment | [1] (M) | [2a] (M) |
|------------|---------|----------|
| Alkene-A   | 0.100   | 0.200    |
| Alkene-B1  | 0.200   | 0.200    |
| Alkene-B2  | 0.200   | 0.200    |

| Experiment | [1] (M) | [2a] (M) |
|------------|---------|----------|
| Boronic-A  | 0.100   | 0.200    |
| Boronic-B1 | 0.100   | 0.100    |
| Boronic-B2 | 0.100   | 0.100    |
| Boronic-C  | 0.400   | 0.400    |

**Figure S21:** Kinetic profile for experiments performed at different excess in **1**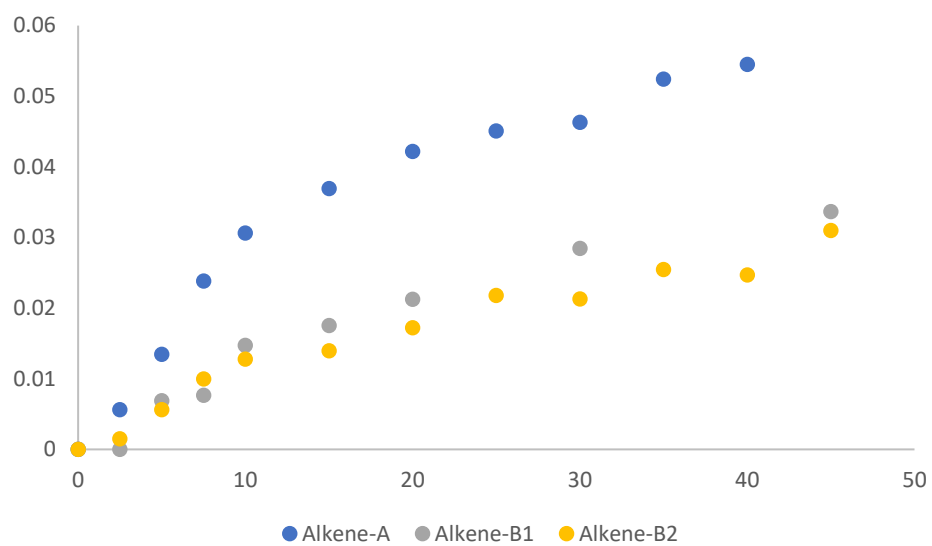**Figure S22:** Kinetic profile for experiments performed at different excess in **2a**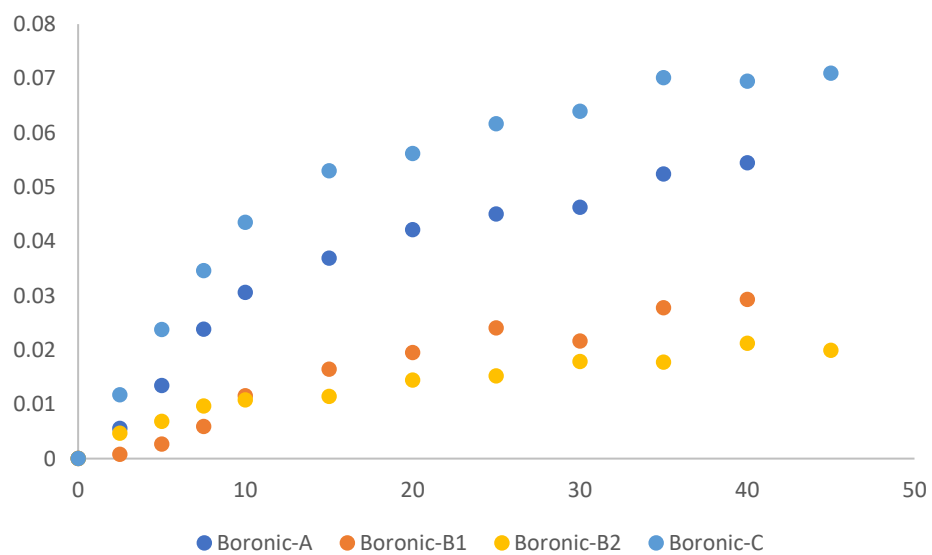

### Comparison of Different Stir Rates

Comparison of different stir rates were conducted using General Kinetic Procedure, with the following variations:

| Experiment | RPM  |
|------------|------|
| StirRate-A | 1000 |
| StirRate-B | 500  |

**Figure S23:** Kinetic profile for experiments performed at different stir rates

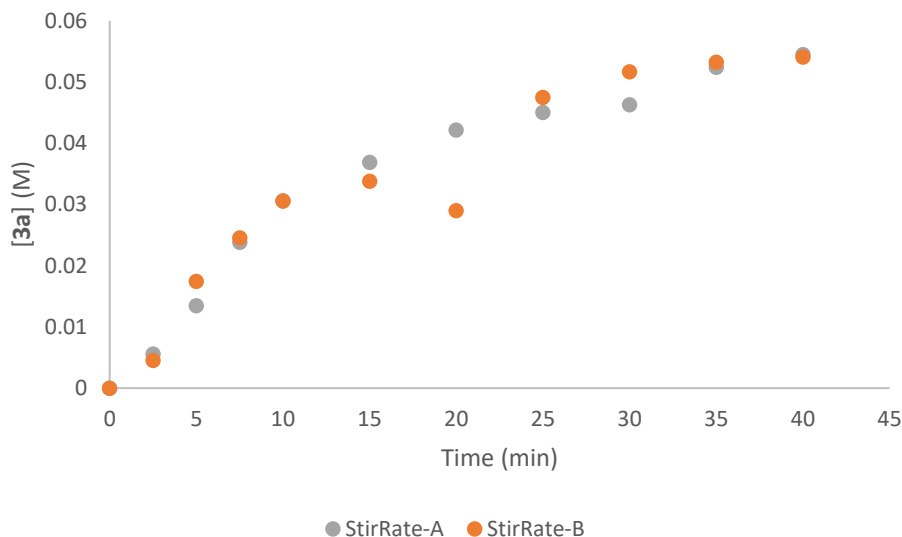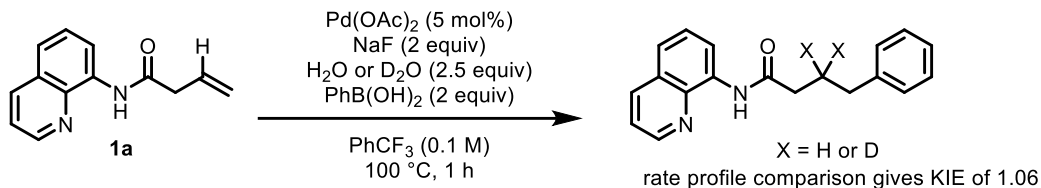

### Comparison of global rate profile between using H<sub>2</sub>O and D<sub>2</sub>O:

Comparison of global rate profile between using H<sub>2</sub>O and D<sub>2</sub>O was conducted using General Kinetic Procedure and benzotrifluoride dried over 4 Å molecular sieves. The rate profile is as shown in Scheme 4 of the main paper.

### Determination of catalyst order

Determination of catalyst order was conducted using General Kinetic Procedure, with the following variations:

| Experiment | [Pd(OAc) <sub>2</sub> ] |
|------------|-------------------------|
| Pd-A       | 0.00983                 |
| Pd-B       | 0.01509                 |
| Pd-C       | 0.01933                 |

**Figure S24:** Kinetic profile for experiments performed at different concentrations in Pd(OAc)<sub>2</sub>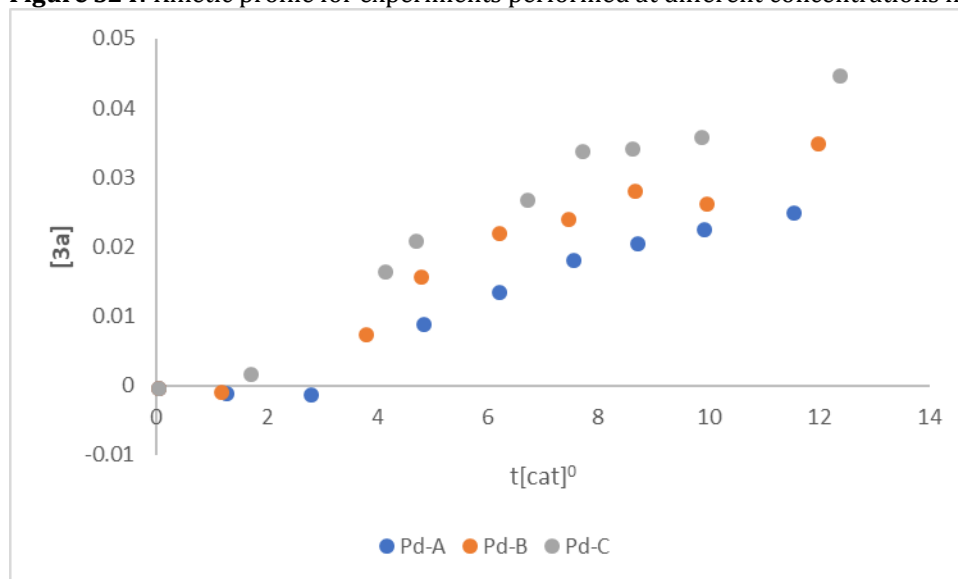

Using the graphical analysis method developed by Burés<sup>11</sup>, the data obtained above was plotted as [3a] against a normalized time scale,  $t[\text{cat}]^m$ .

**Figure S25:** Kinetic profile replotted normalized time scale where  $m = 1$ 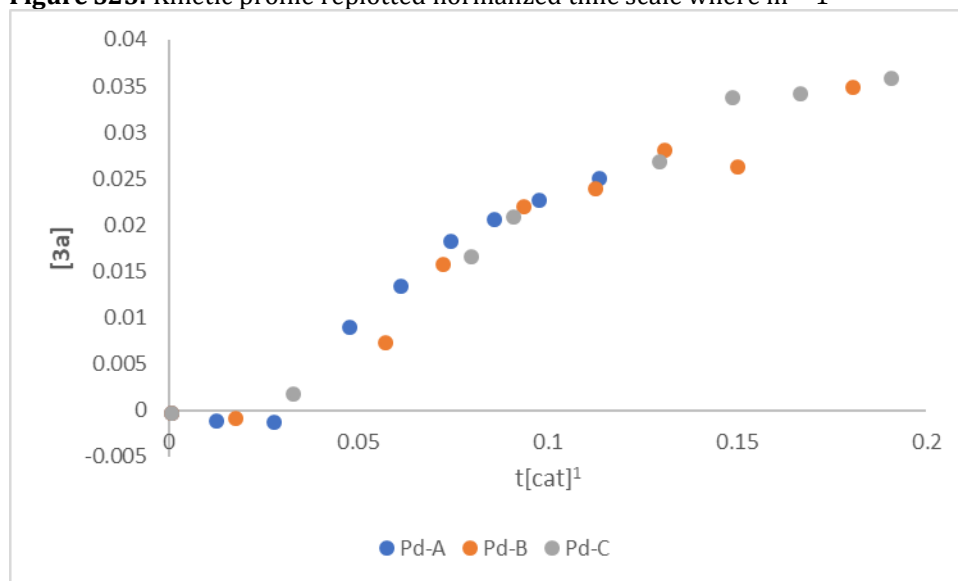

**Figure S26:** Kinetic profile replotted normalized time scale where  $m = 2$ 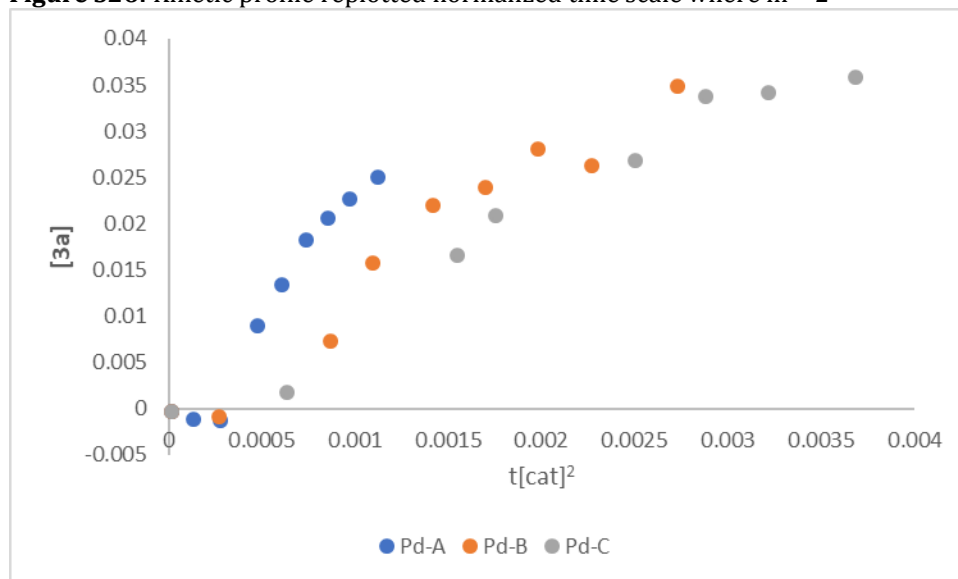

**References**

1. K. S. Yang, J. A. Gurak, Z. Liu, and K. M. Engle, *J. Am. Chem. Soc.* 2016, **138**, 14705.
2. J. A. Gurak, K. S. Yang, Z. Liu, and K. M. Engle, *J. Am. Chem. Soc.* 2016, **138**, 5805.
3. Z. Liu, Y. Wang, Z. Wang, T. Zeng, P. Liu, and K. M. Engle, *J. Am. Chem. Soc.* 2017, **139**, 11261.
4. S.-J. Zhang, W.-W. Sun, P. Cao, X.-P. Dong, J.-K. Liu, and B. Wu, *J. Org. Chem.* 2016, **81**, 956.
5. J. Derosa, V. van Der Puyl, V. T. Tran, M. Liu, and K. M. Engle, *Chem. Sci.* 2018, **9**, 5278.
6. Z. Liu, H.-Q. Ni, T. Zeng, and K. M. Engle, *J. Am. Chem. Soc.* 2018, **140**, 3223.
7. M. Berger, R. Chauhan, C. A. B. Rodrigues, and N. Maulide, *Chem. Eur. J.* 2016, **22**, 16805.
8. Y. Wang, and M. Gu, *Anal. Chem.* 2010, **82**, 7055.
9. A. Gao, X.-Y. Liu, H. Li, C.-H. Ding, and X.-L. Hou, *J. Org. Chem.*, 2017, **82**, 9988.
10. C. M. So, S. Kume, and T. Hayashi, *J. Am. Chem. Soc.*, 2013, **135**, 10990.
11. J. Burés, *Angew. Chem. Int. Ed.*, 2016, **55**, 2028.



Selected  $^1\text{H}$  and  $^{13}\text{C}$  NMR Spectra

3a.1.fid

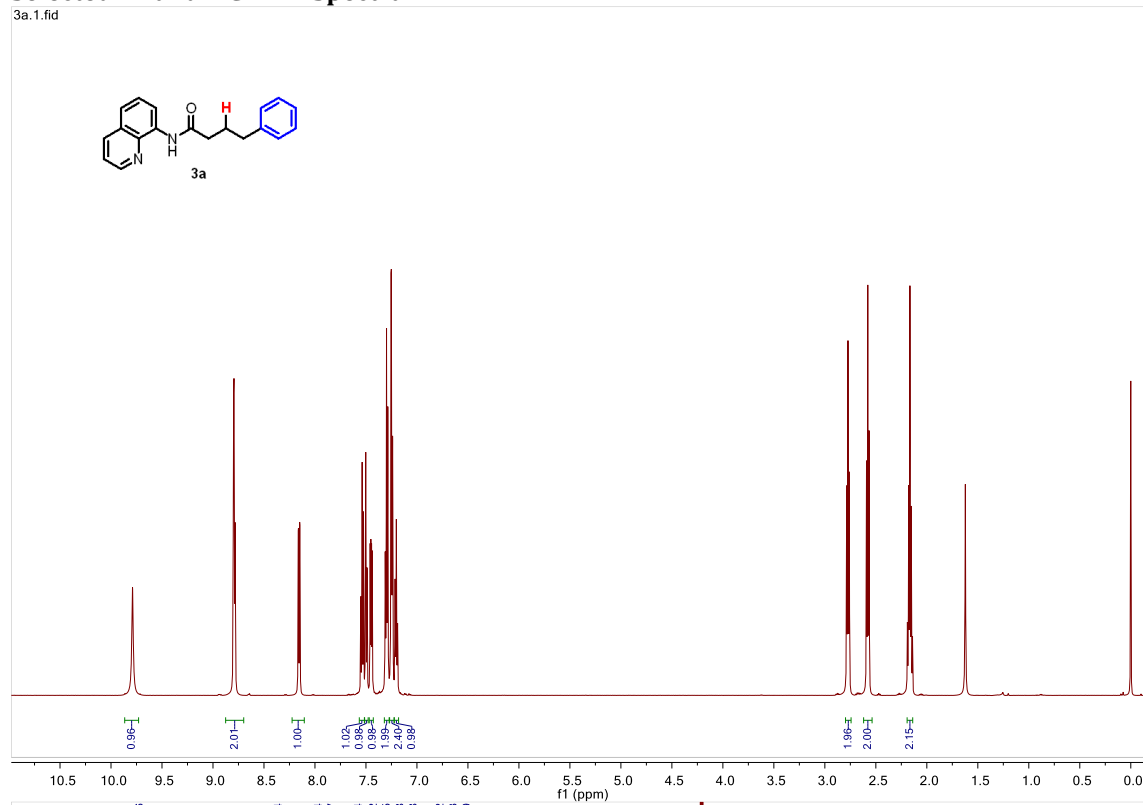

3a.2.fid

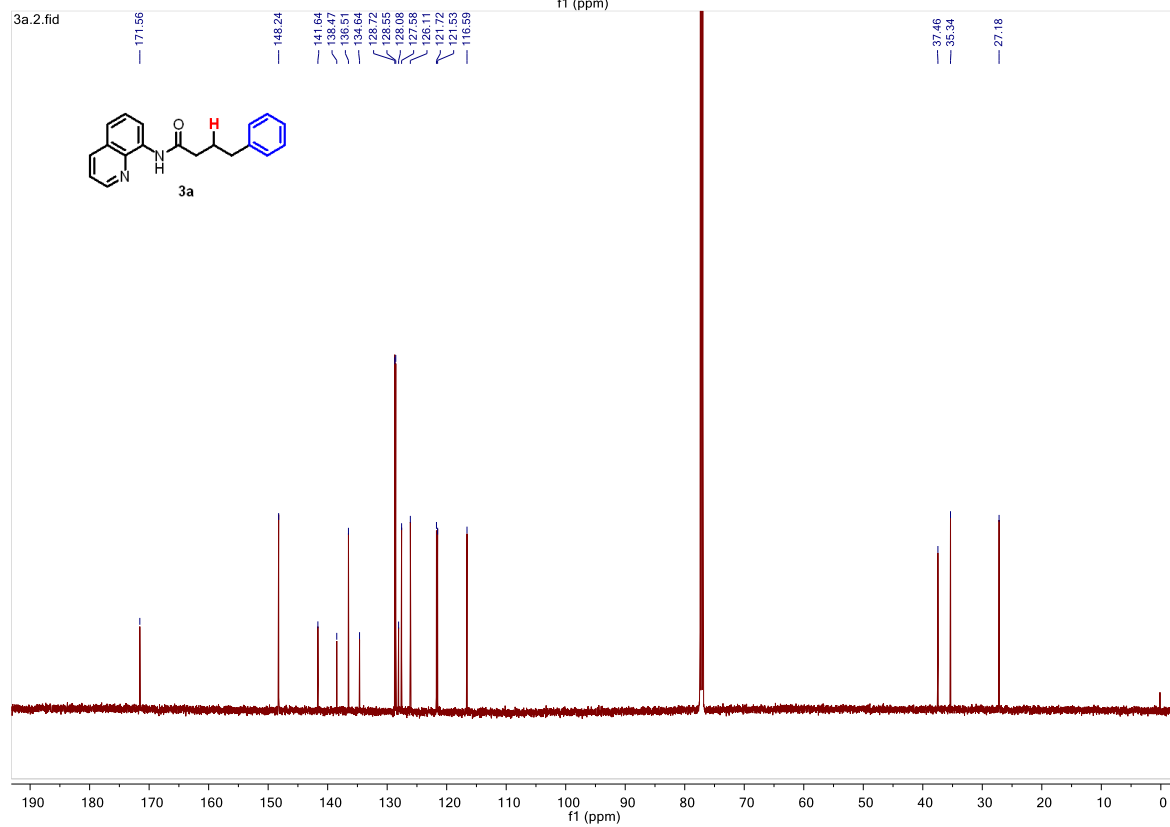

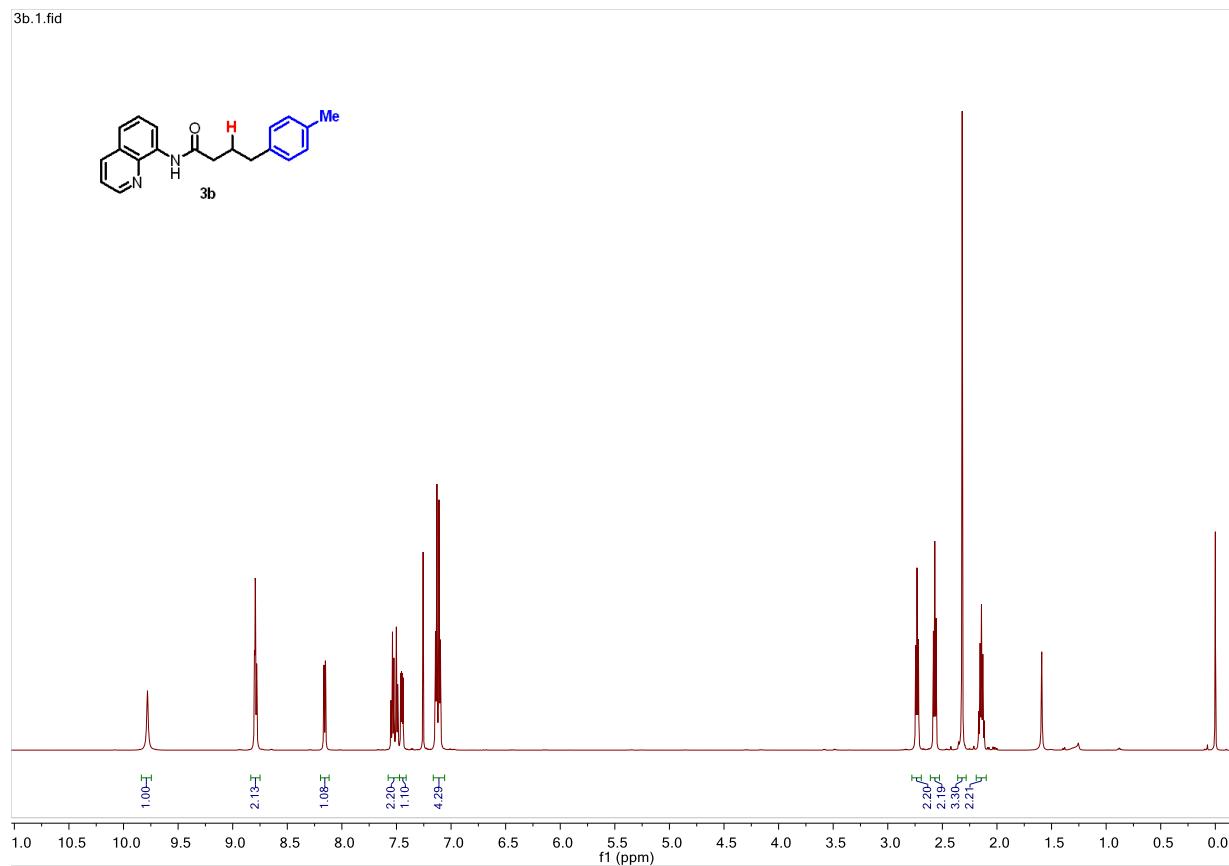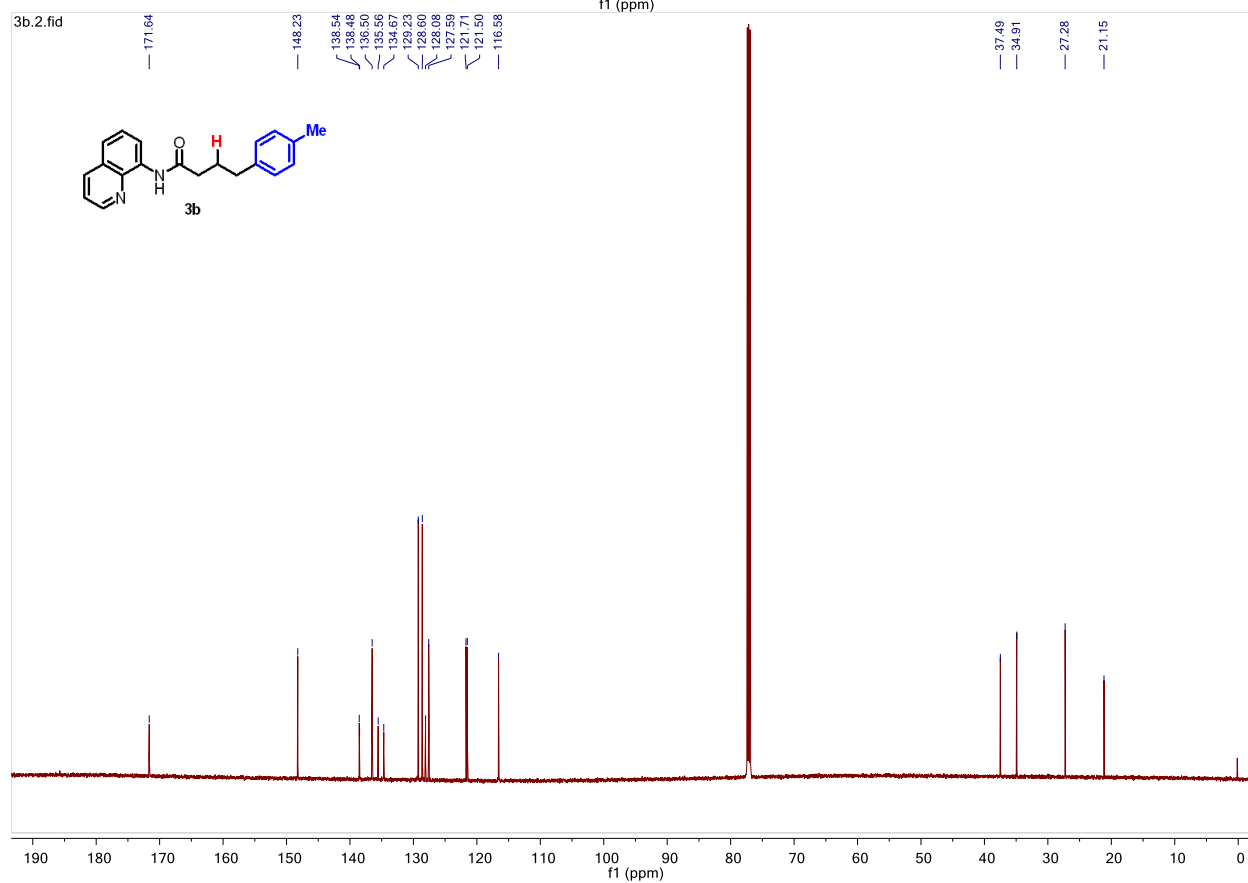

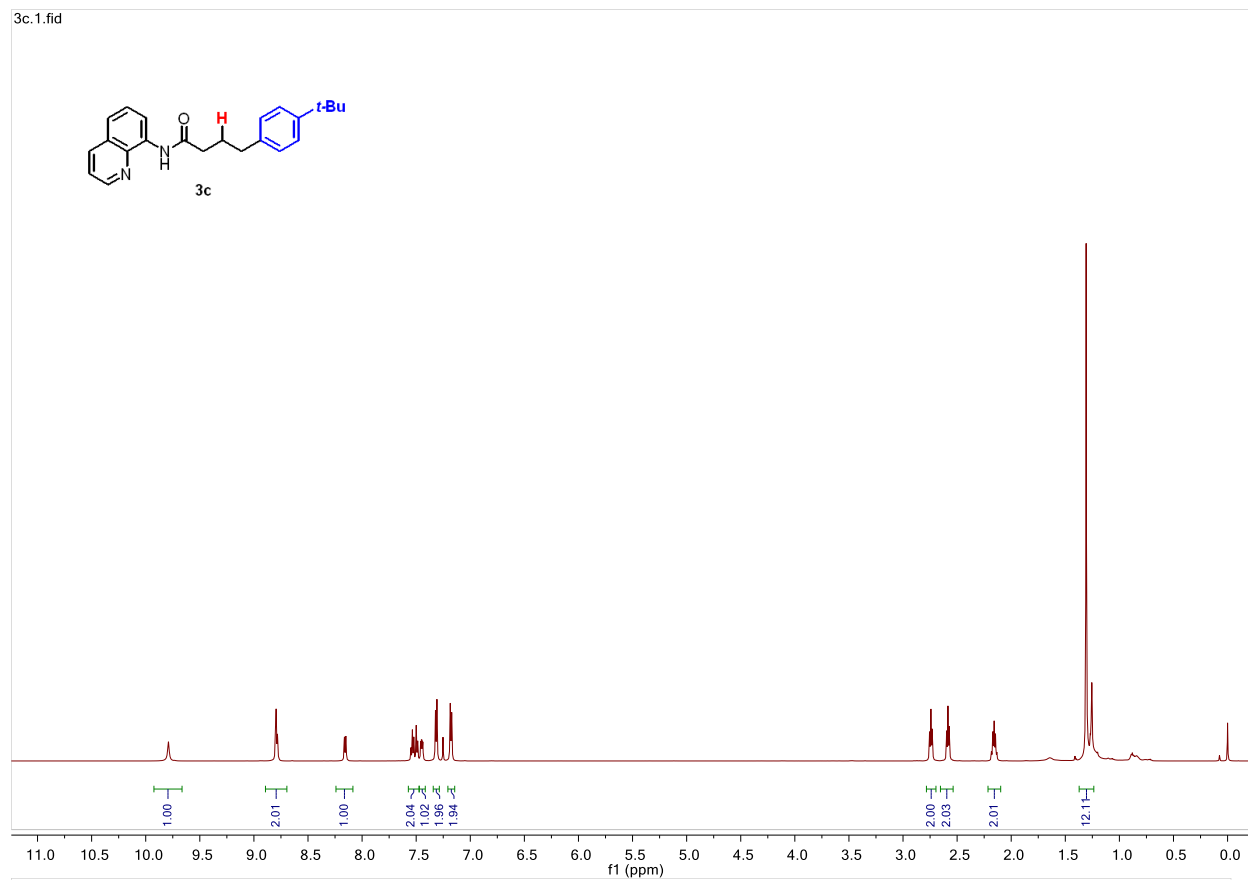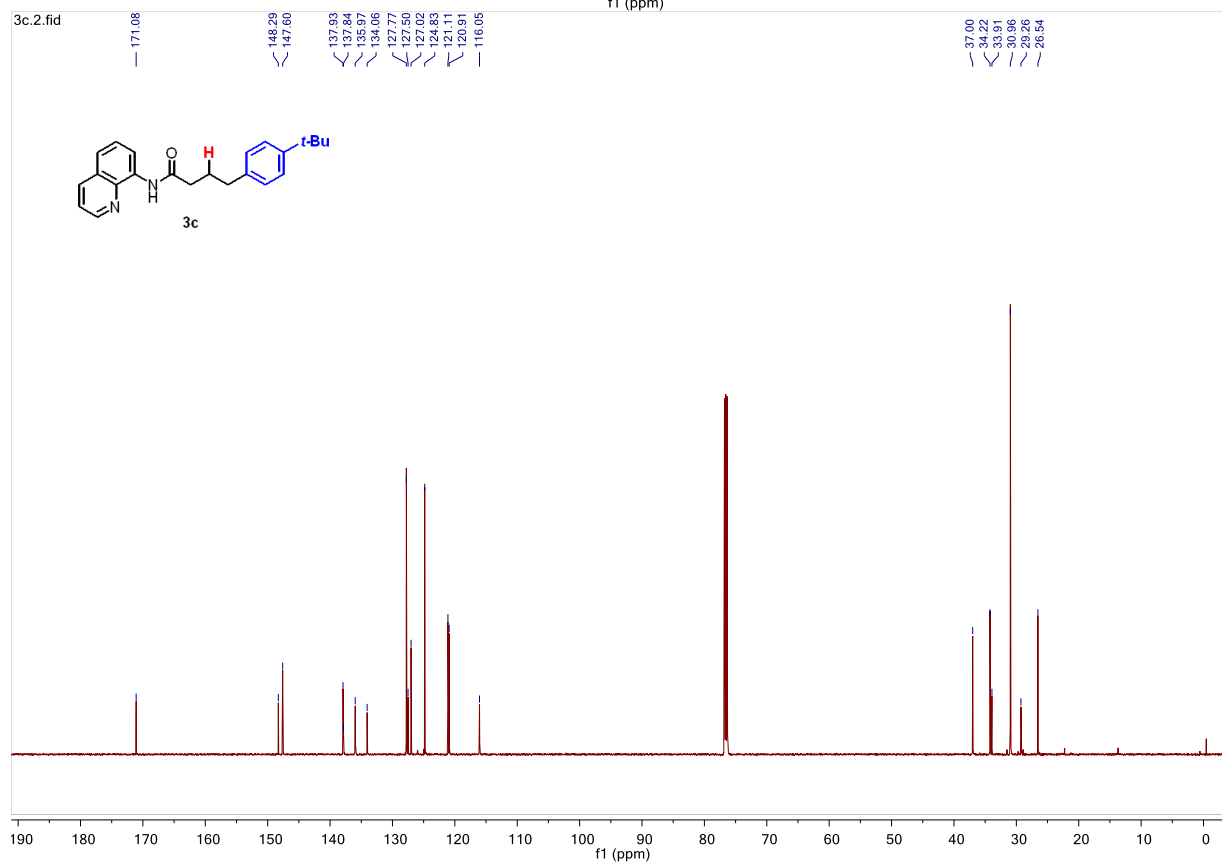

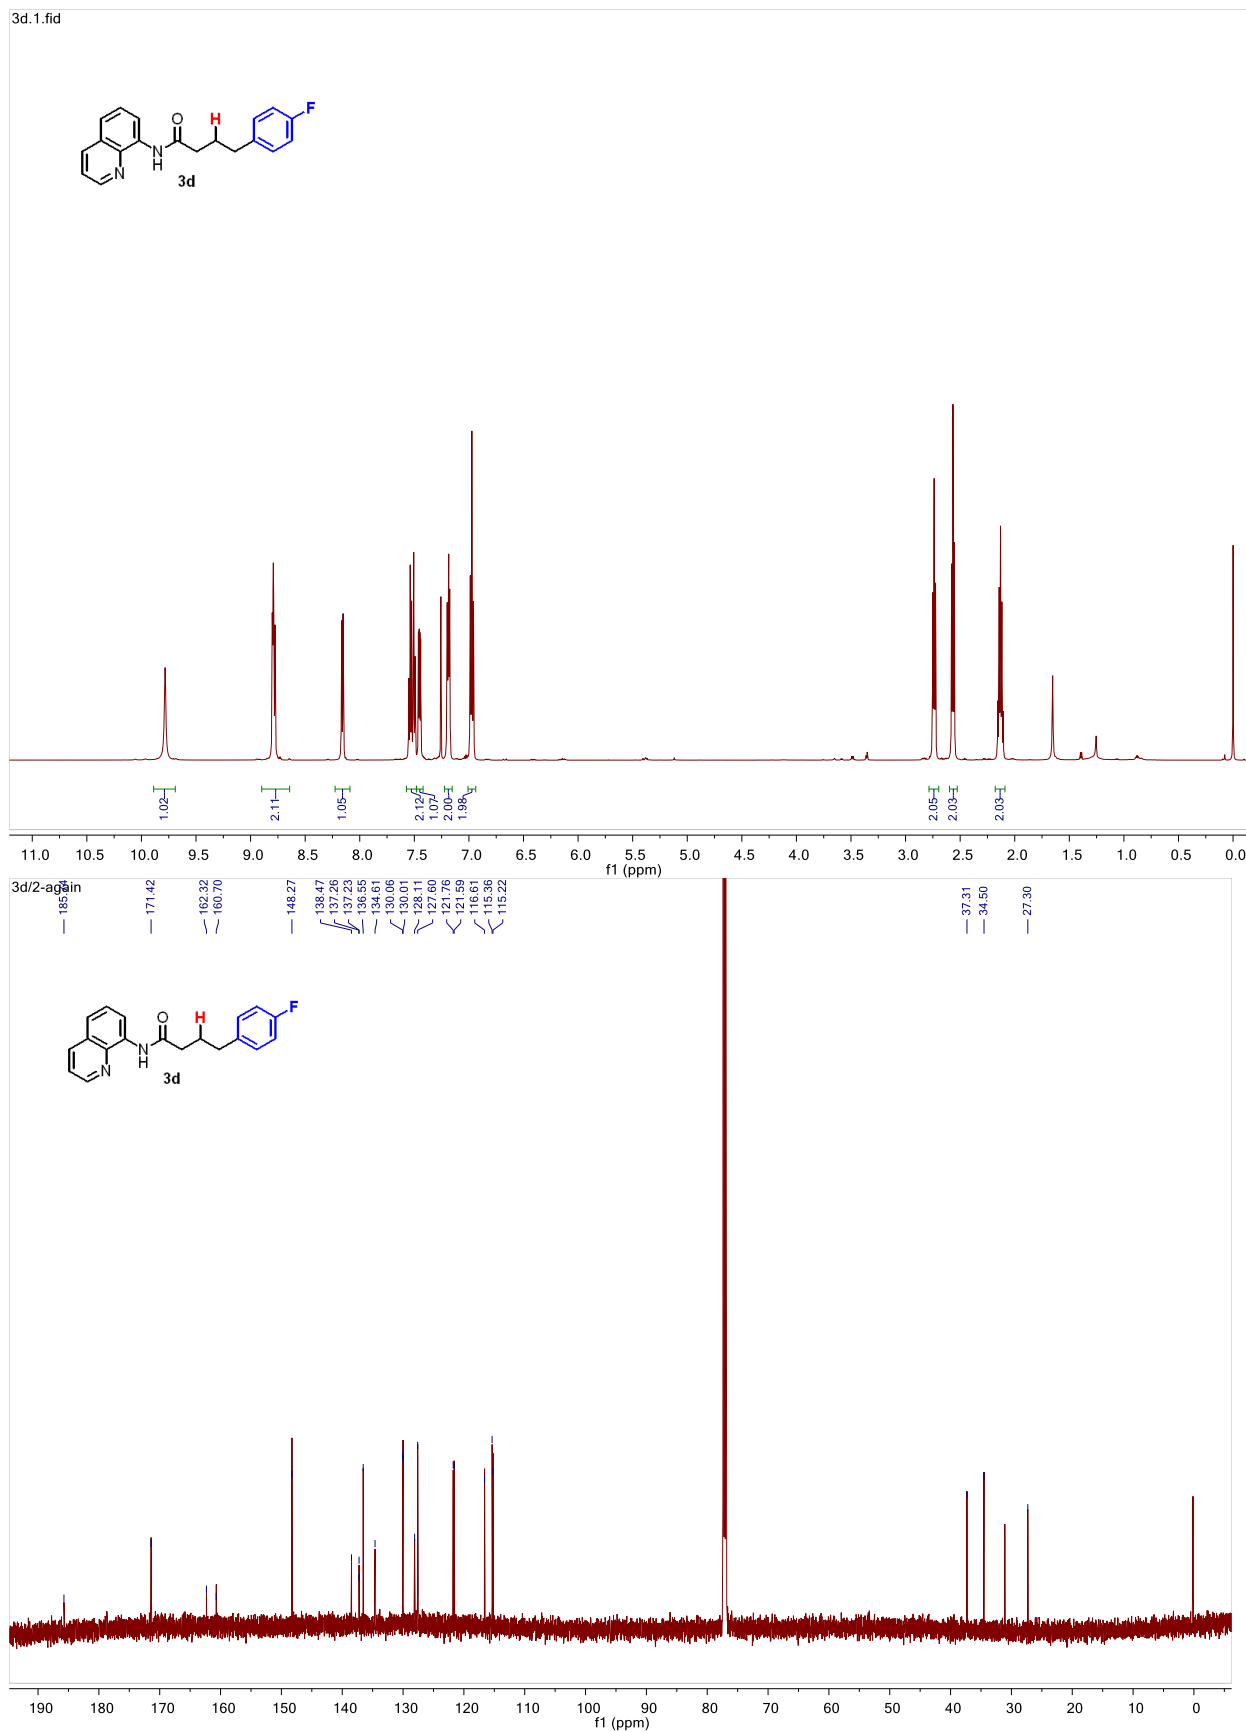

3d.3.fid

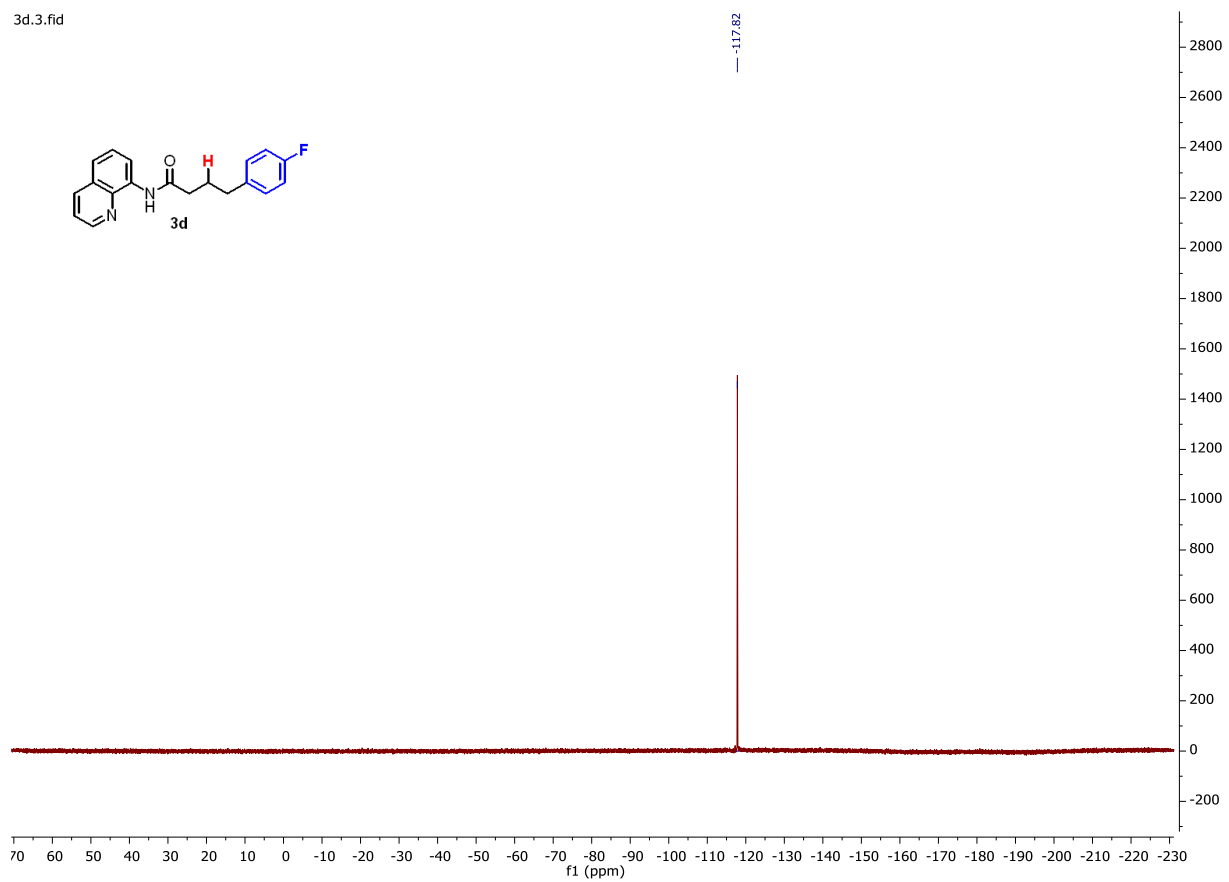

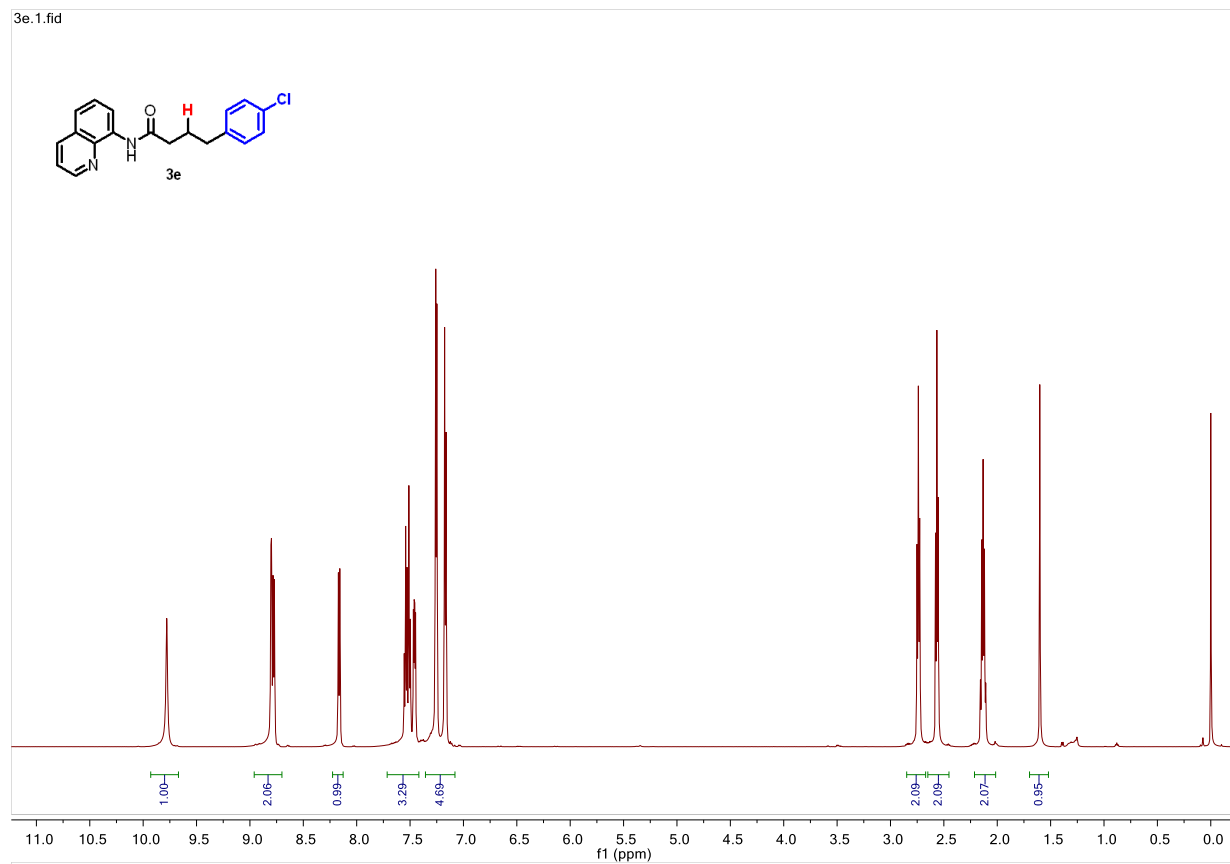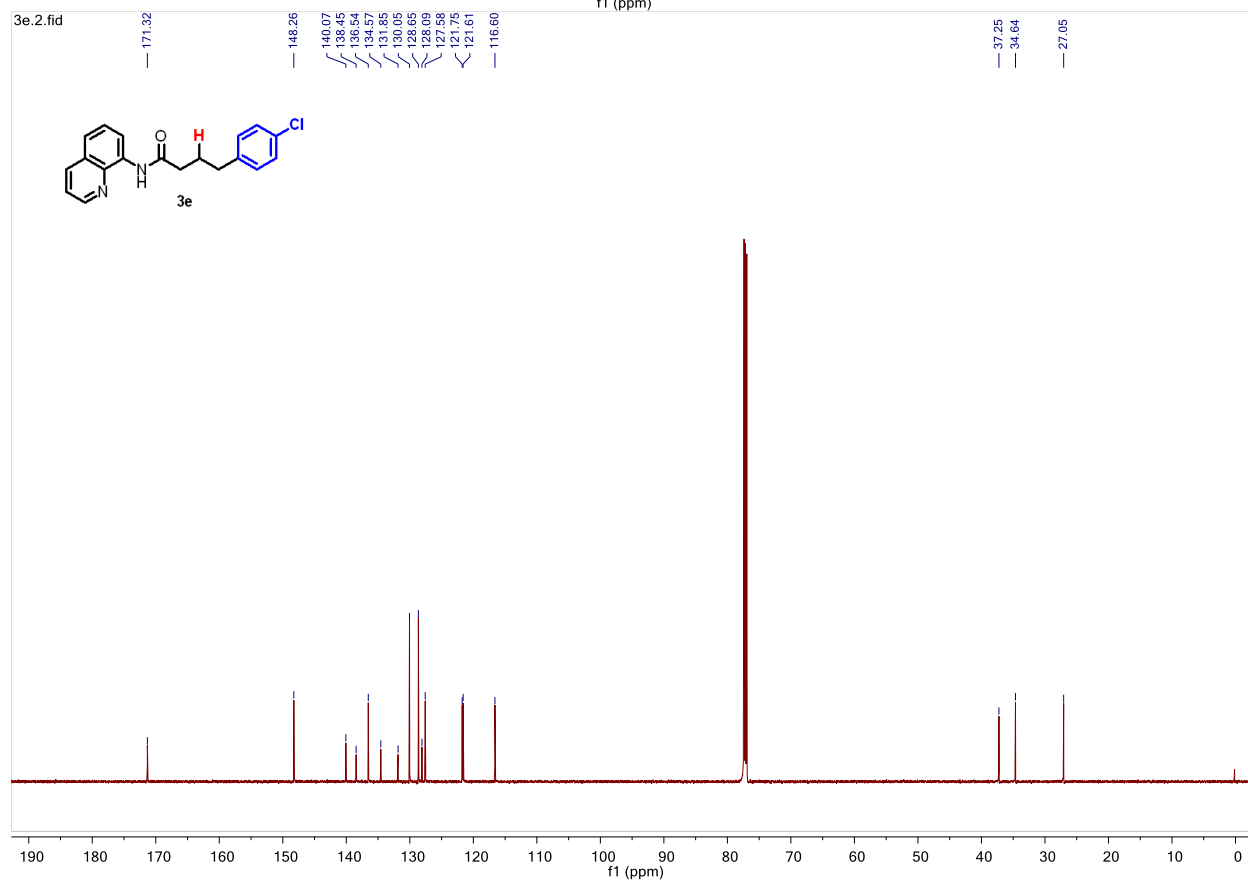

3f.1.fid

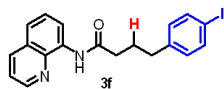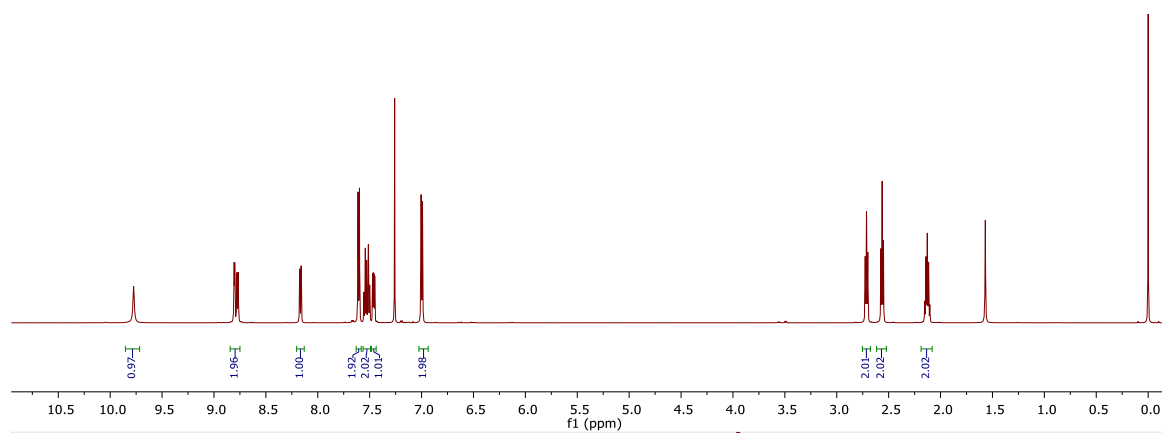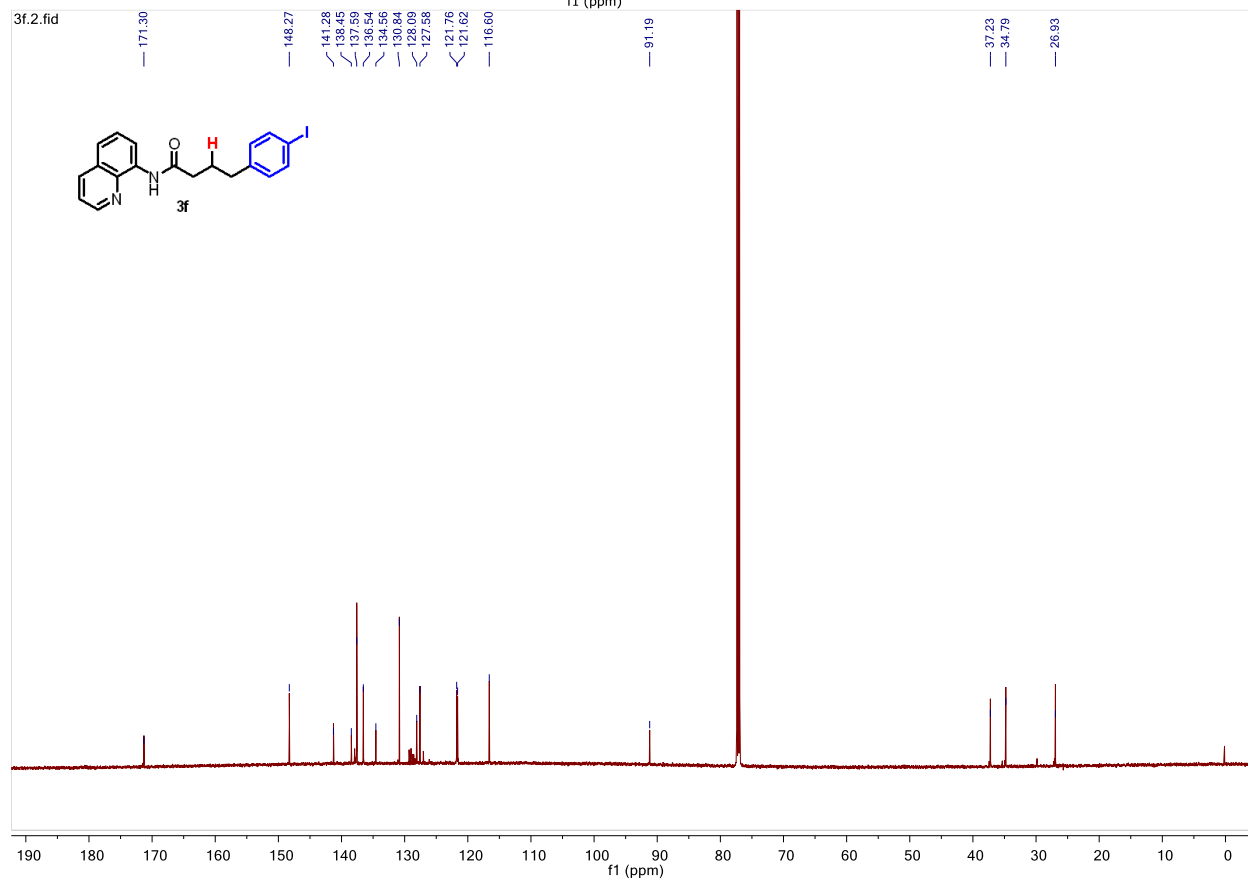

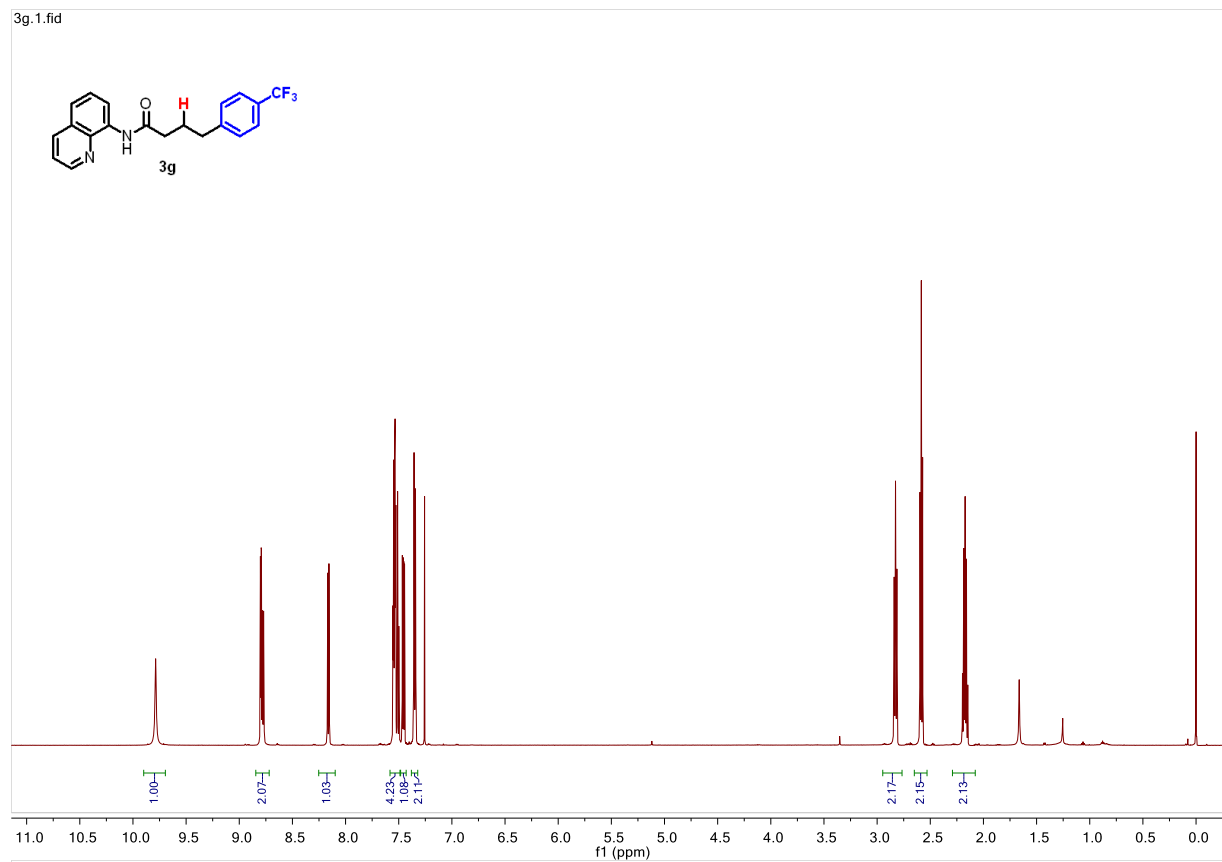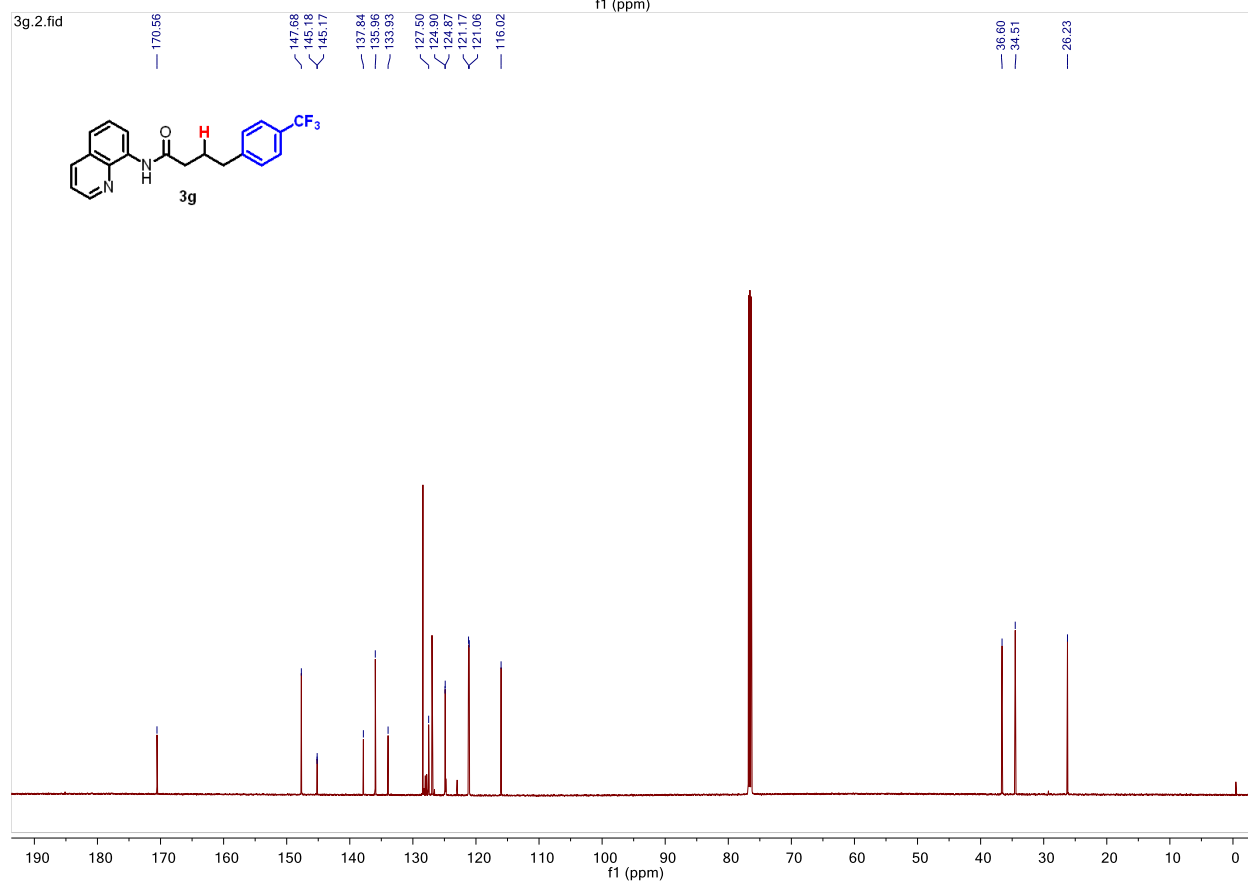



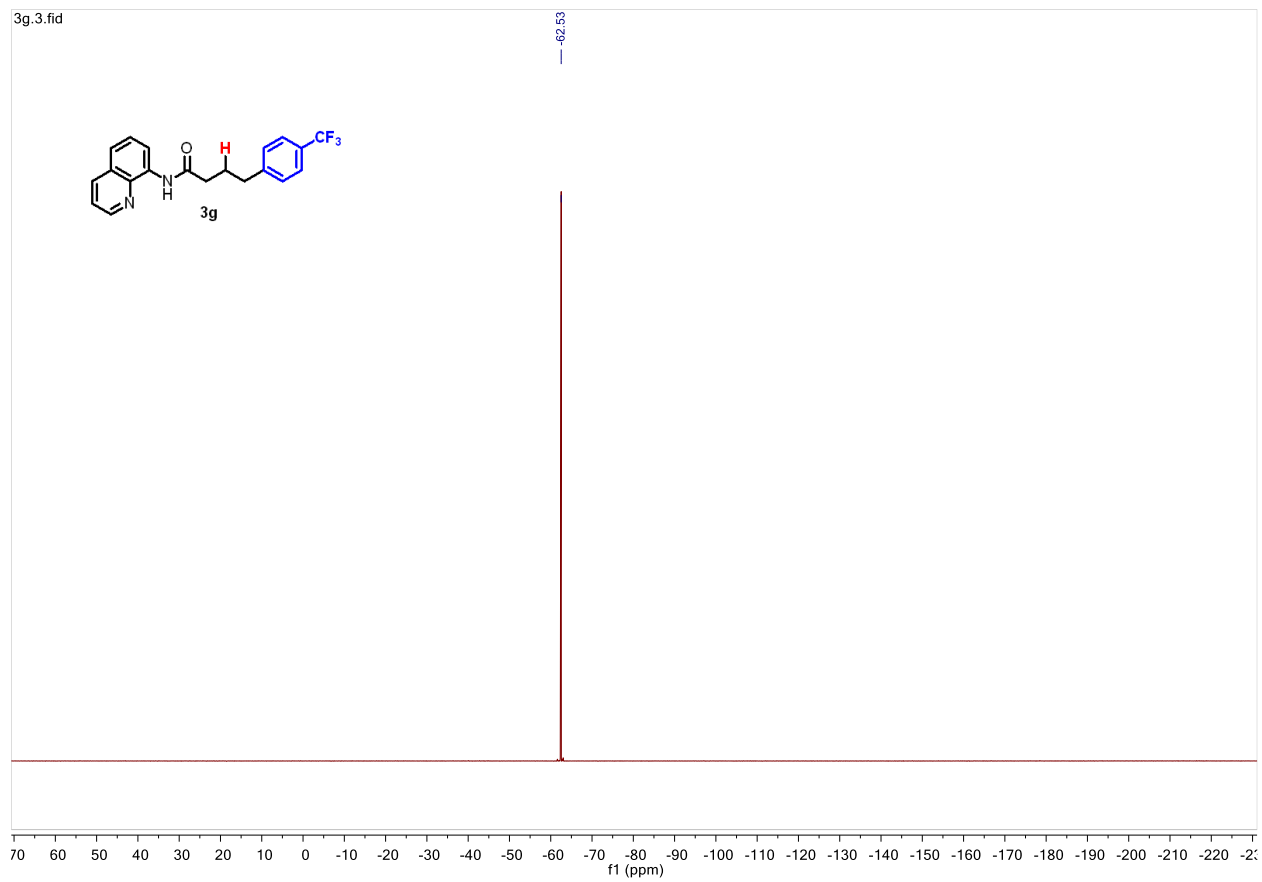

3h.1.fid

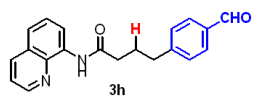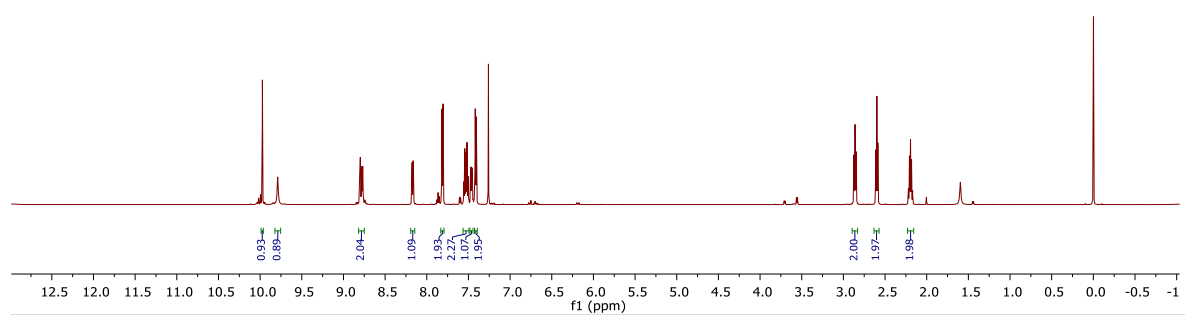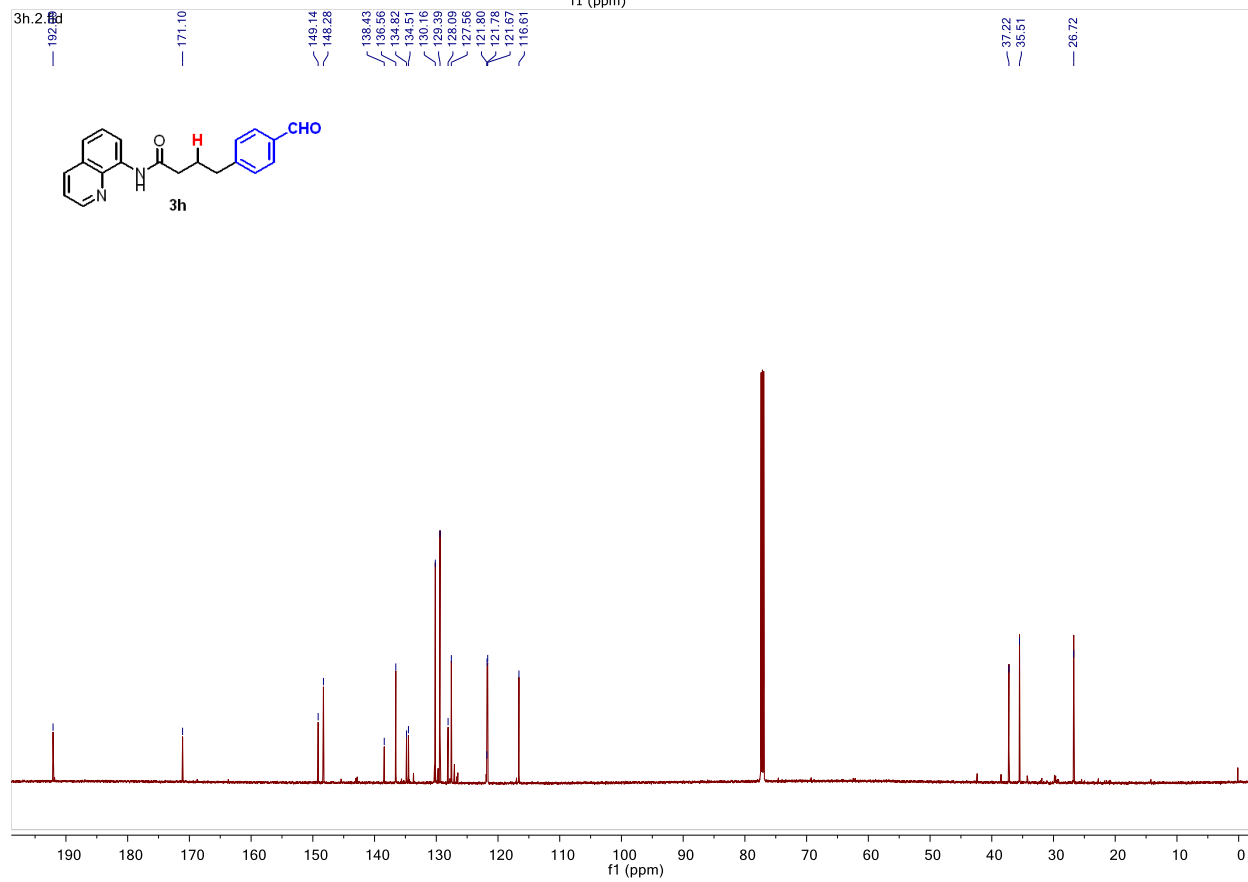

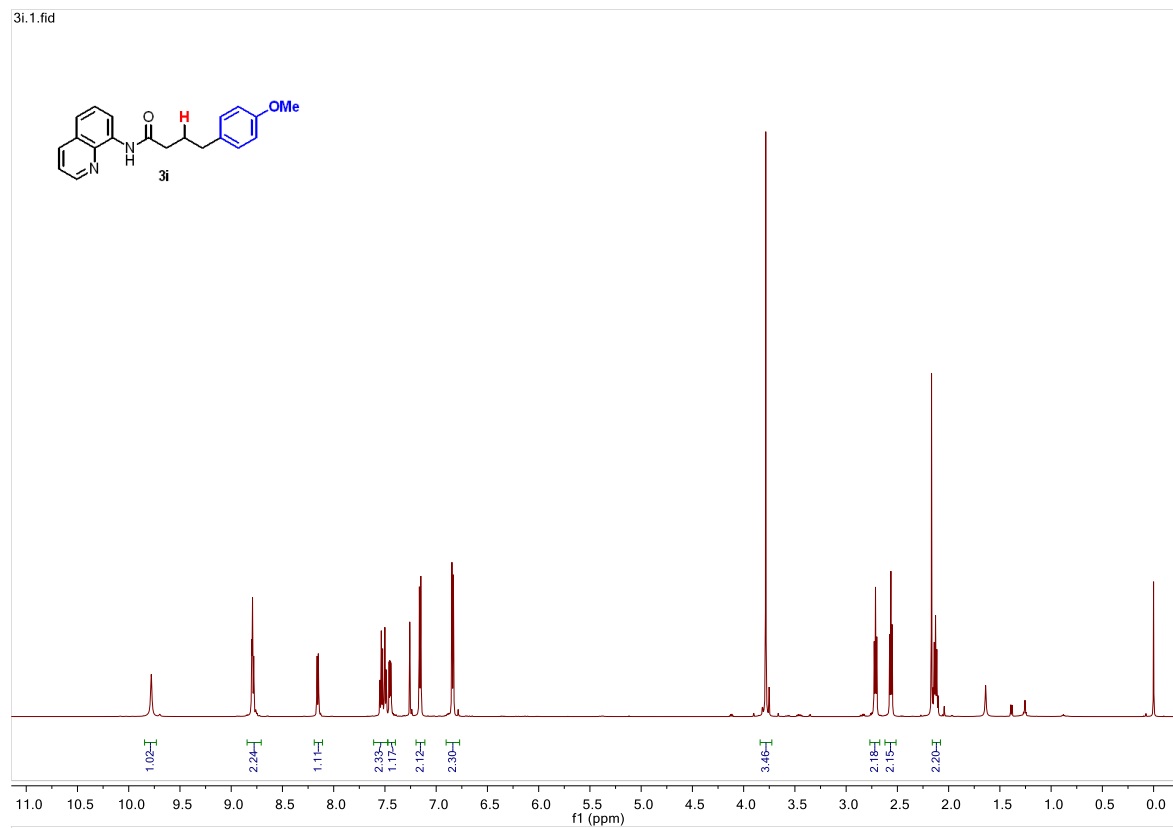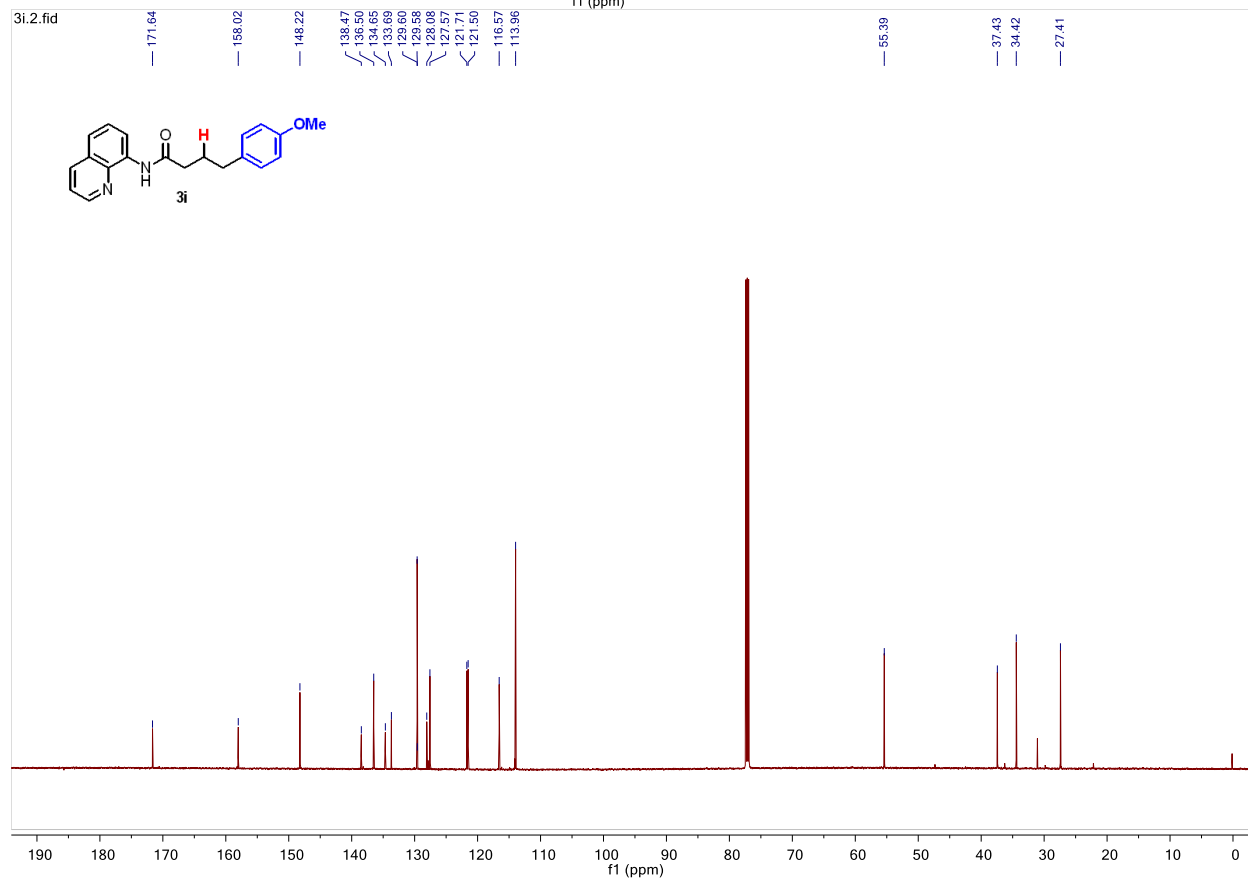

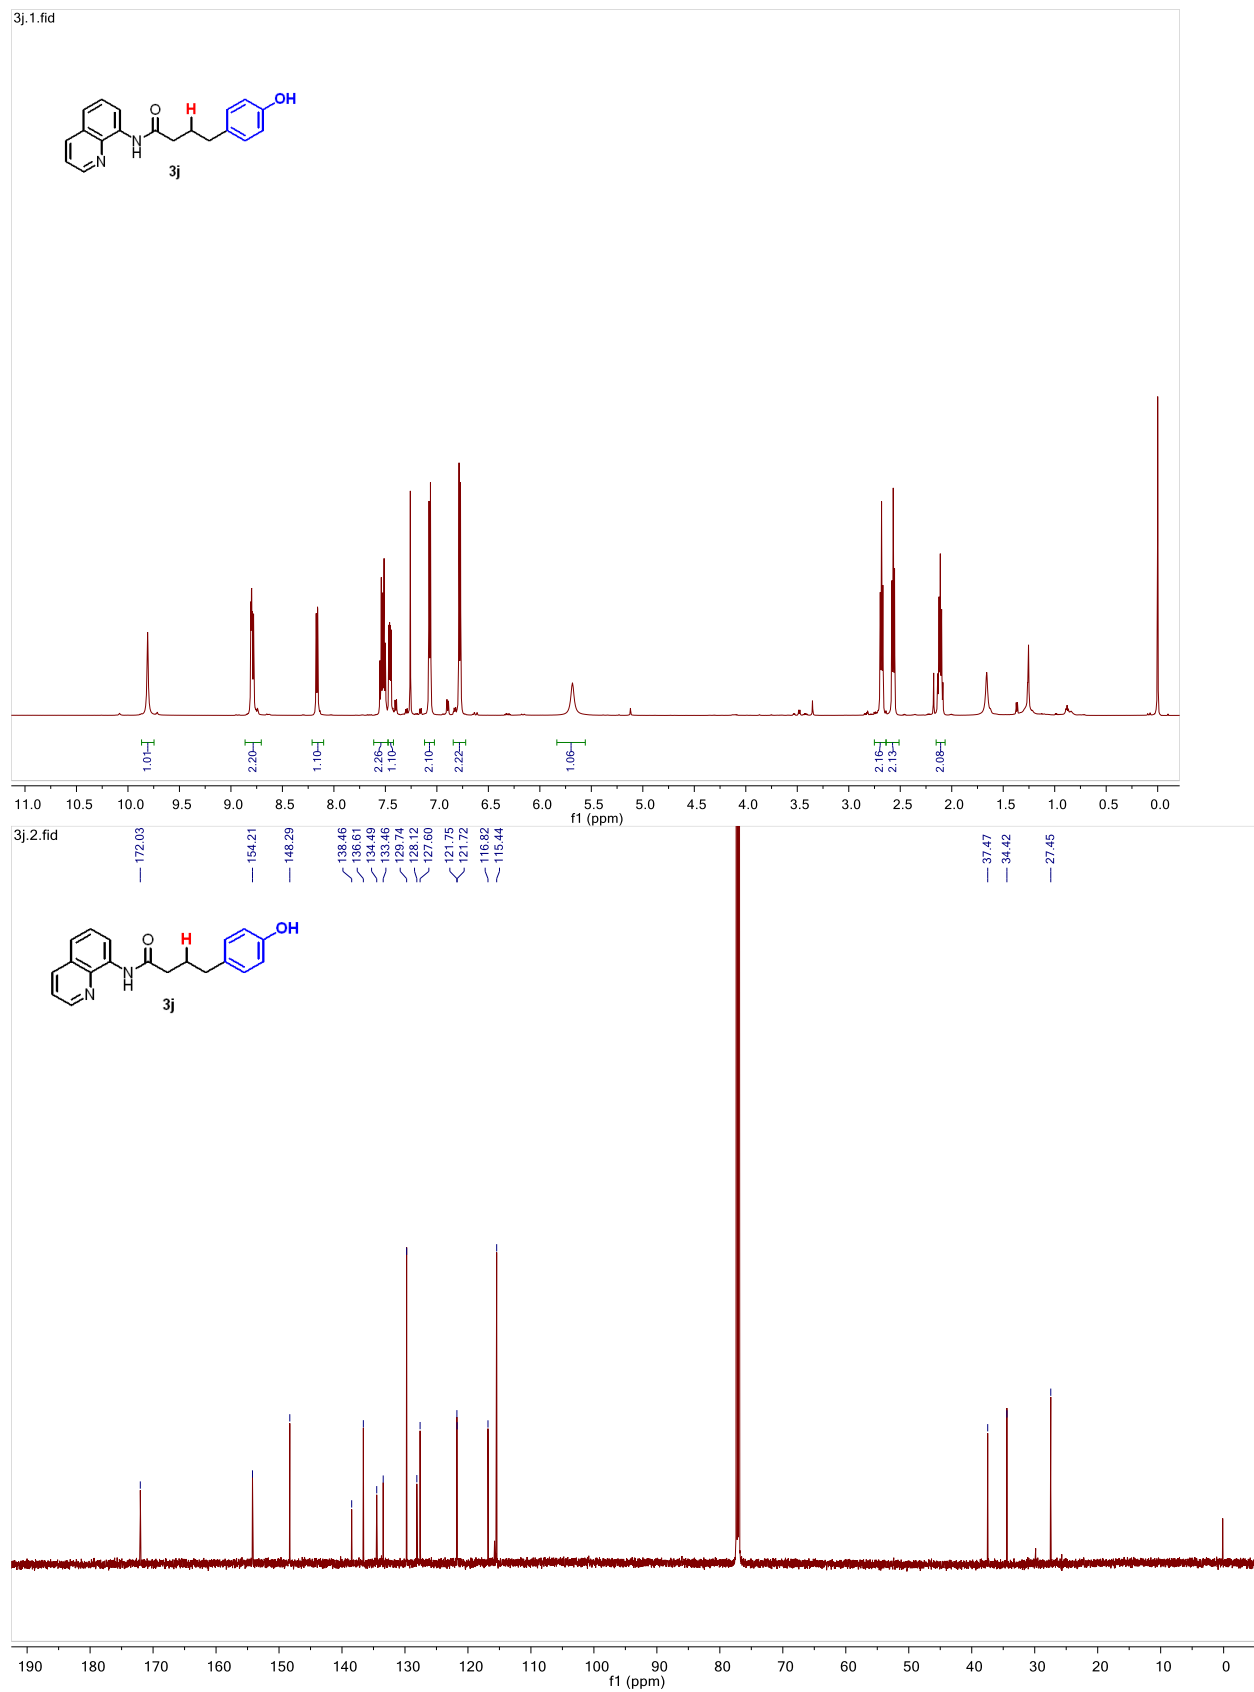

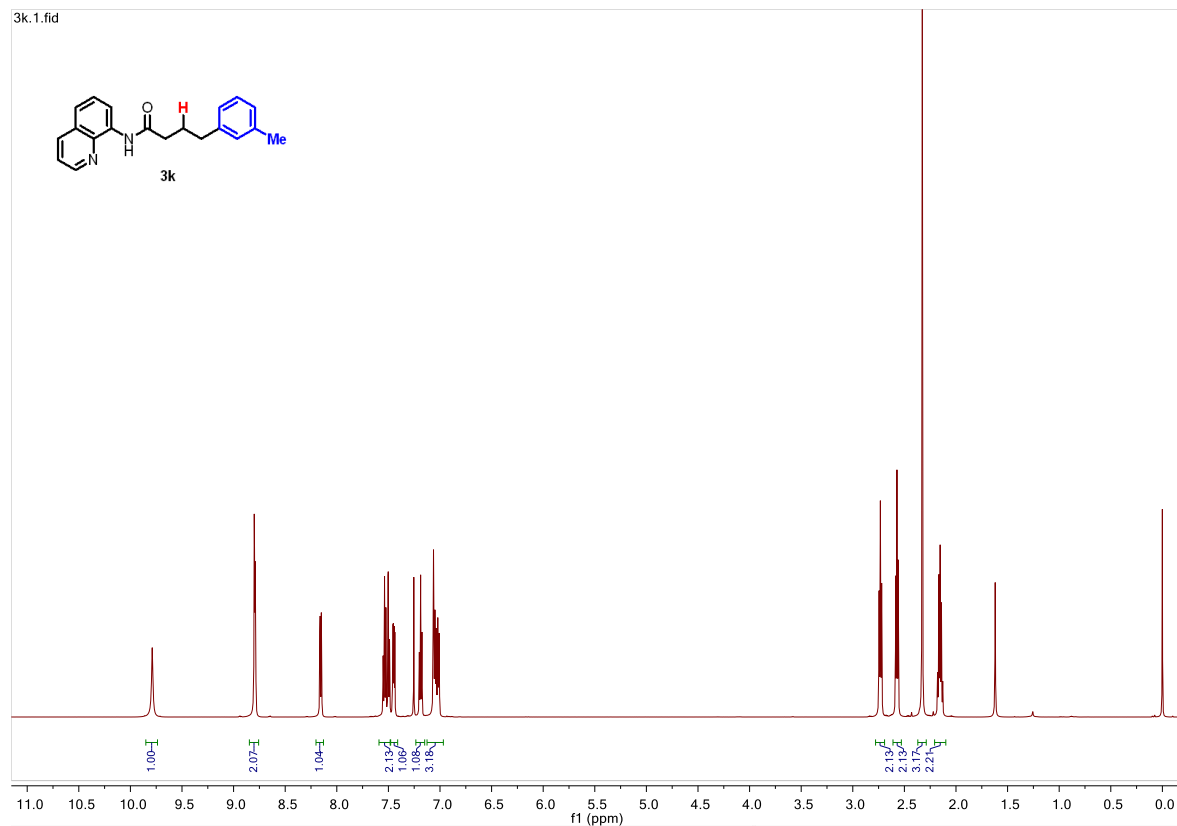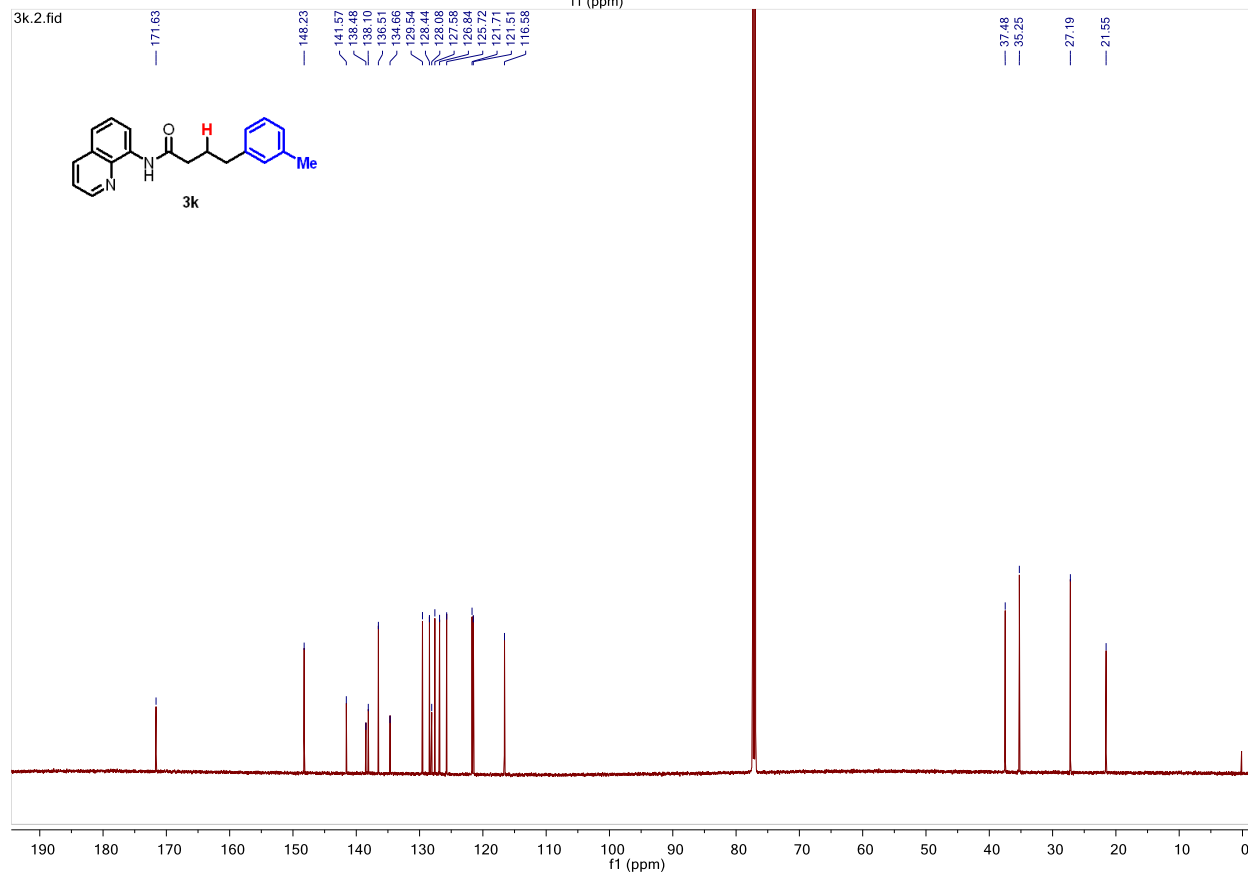

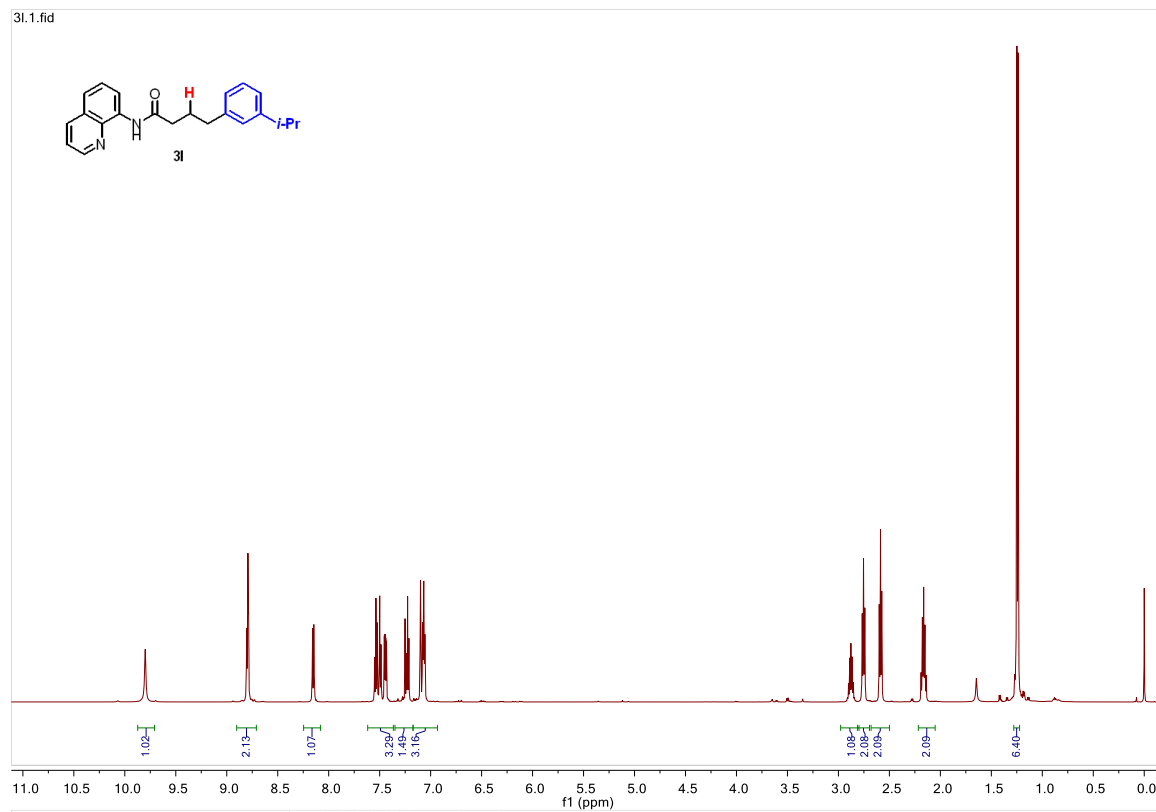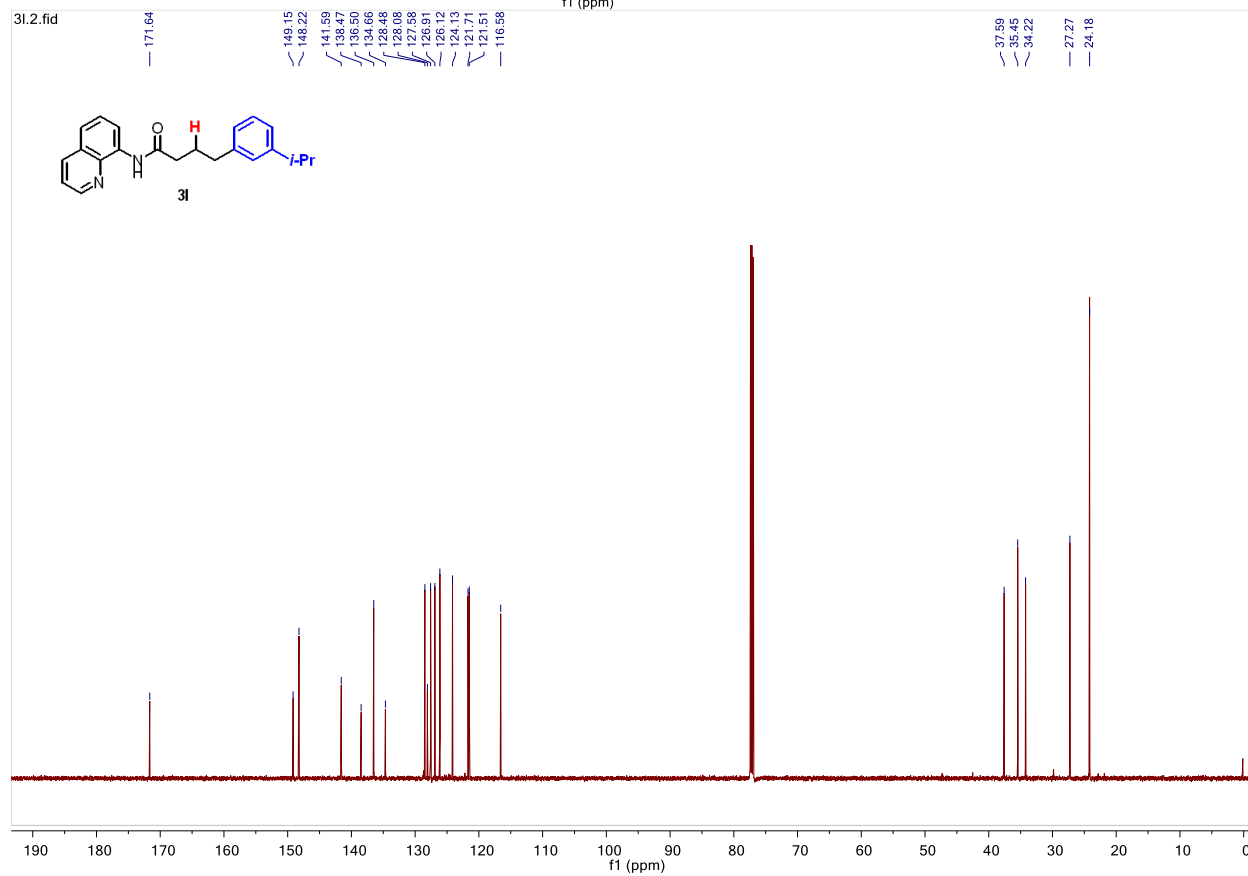

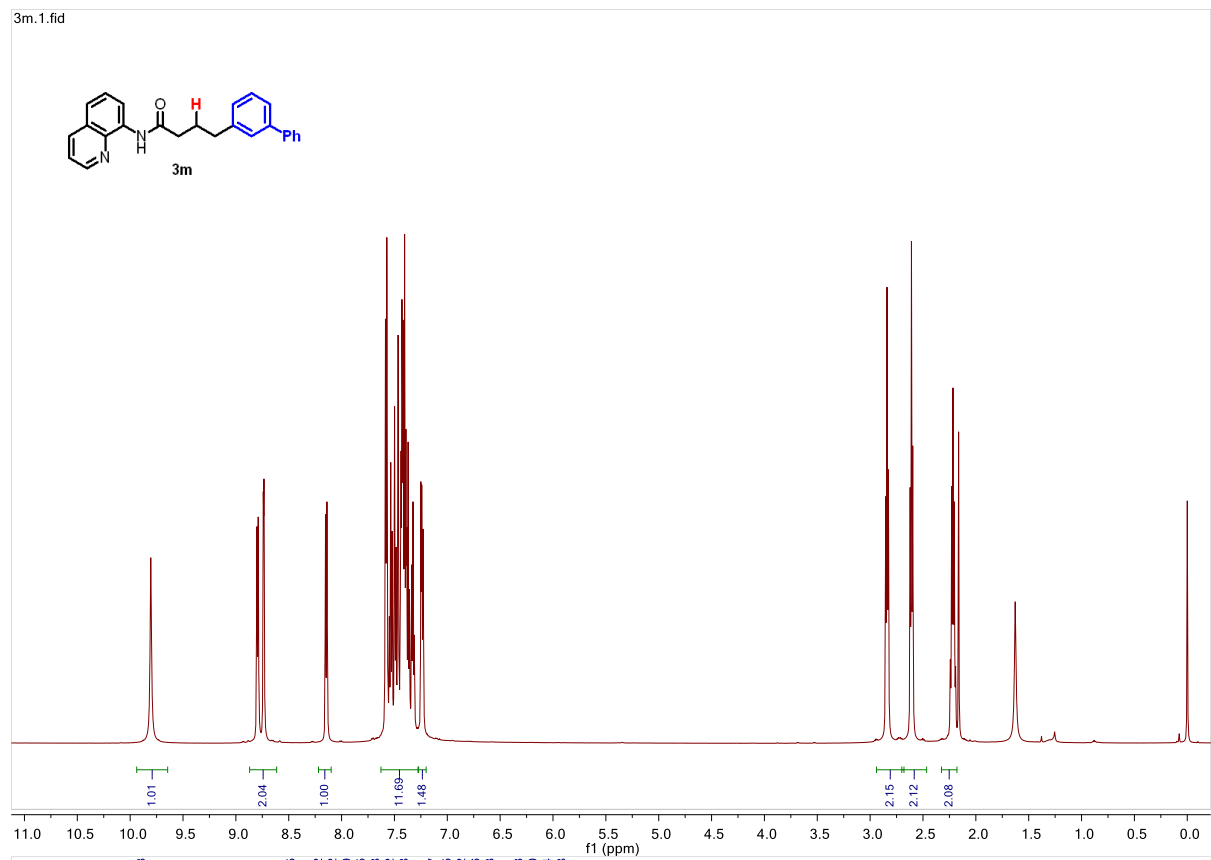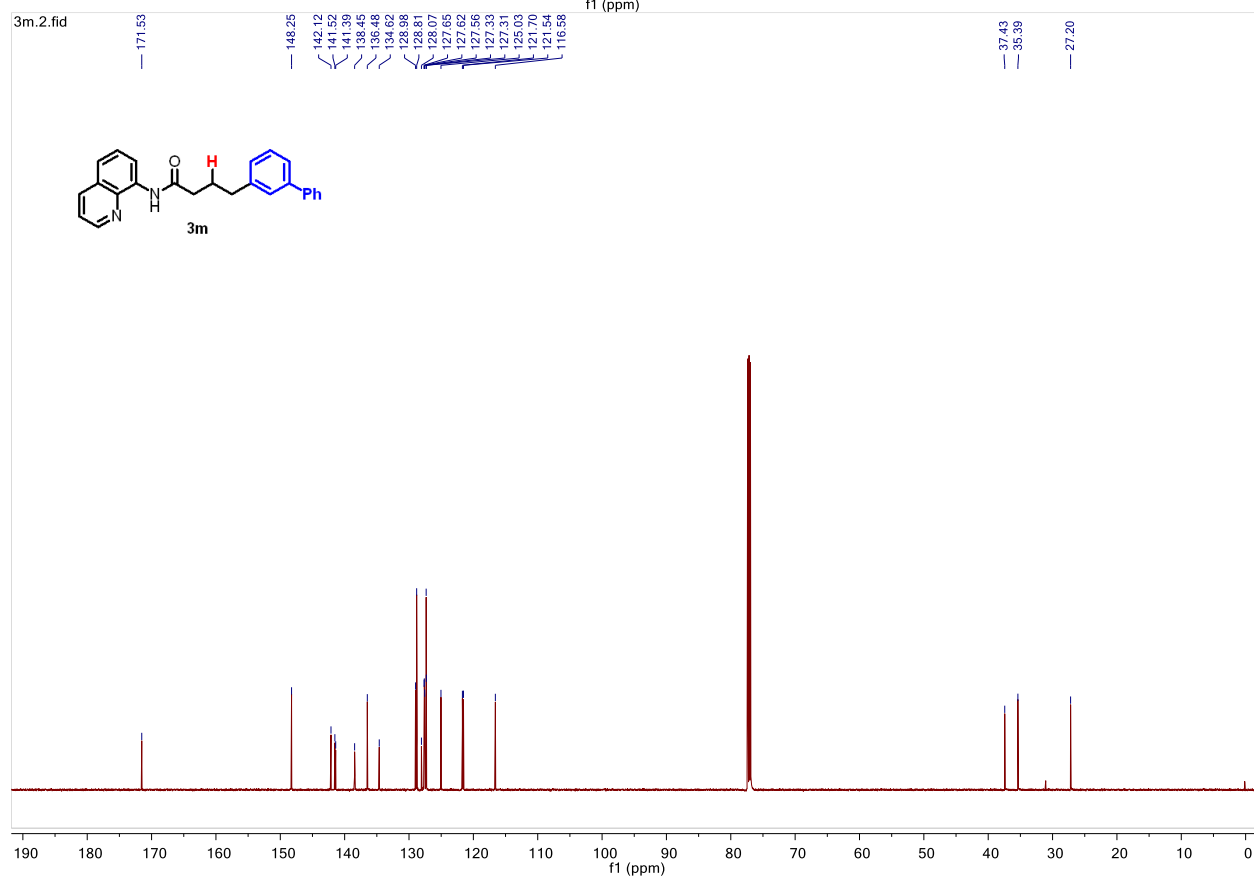

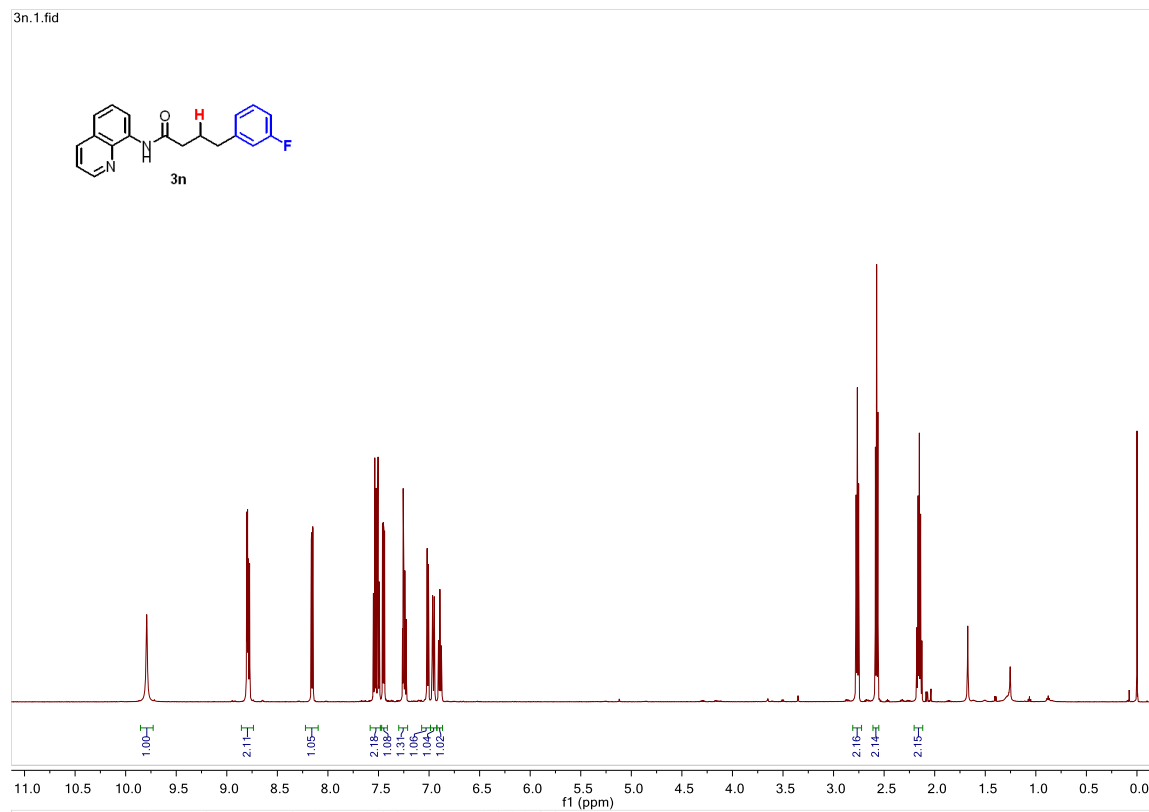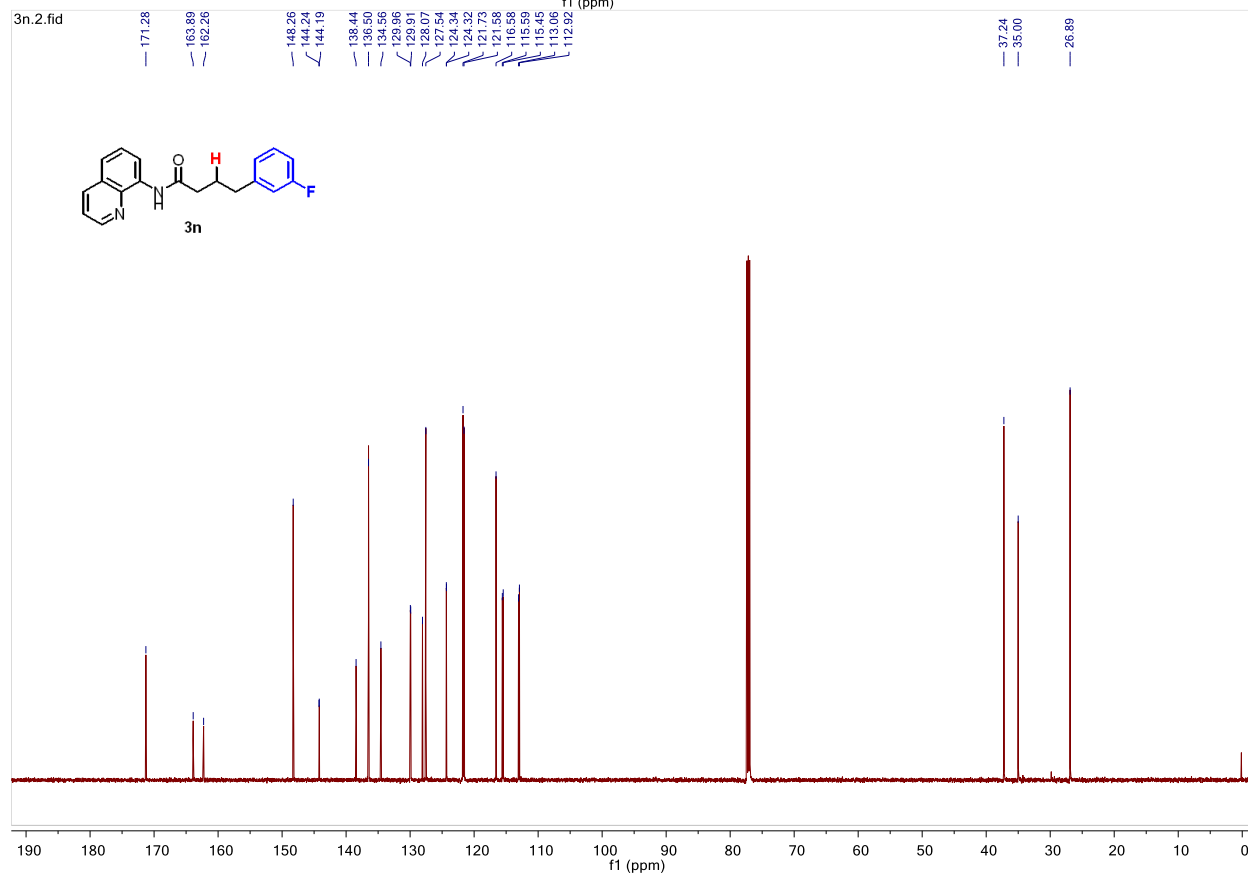



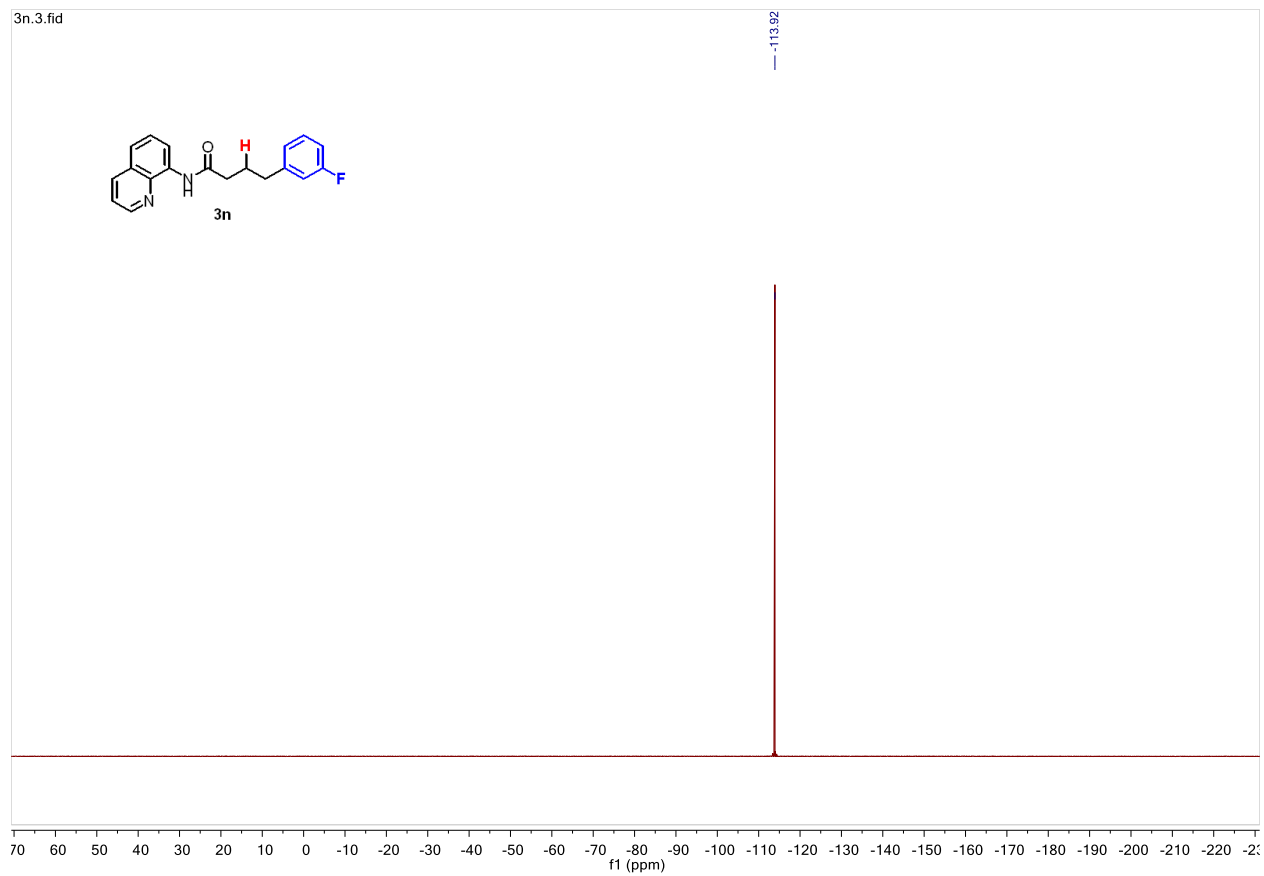

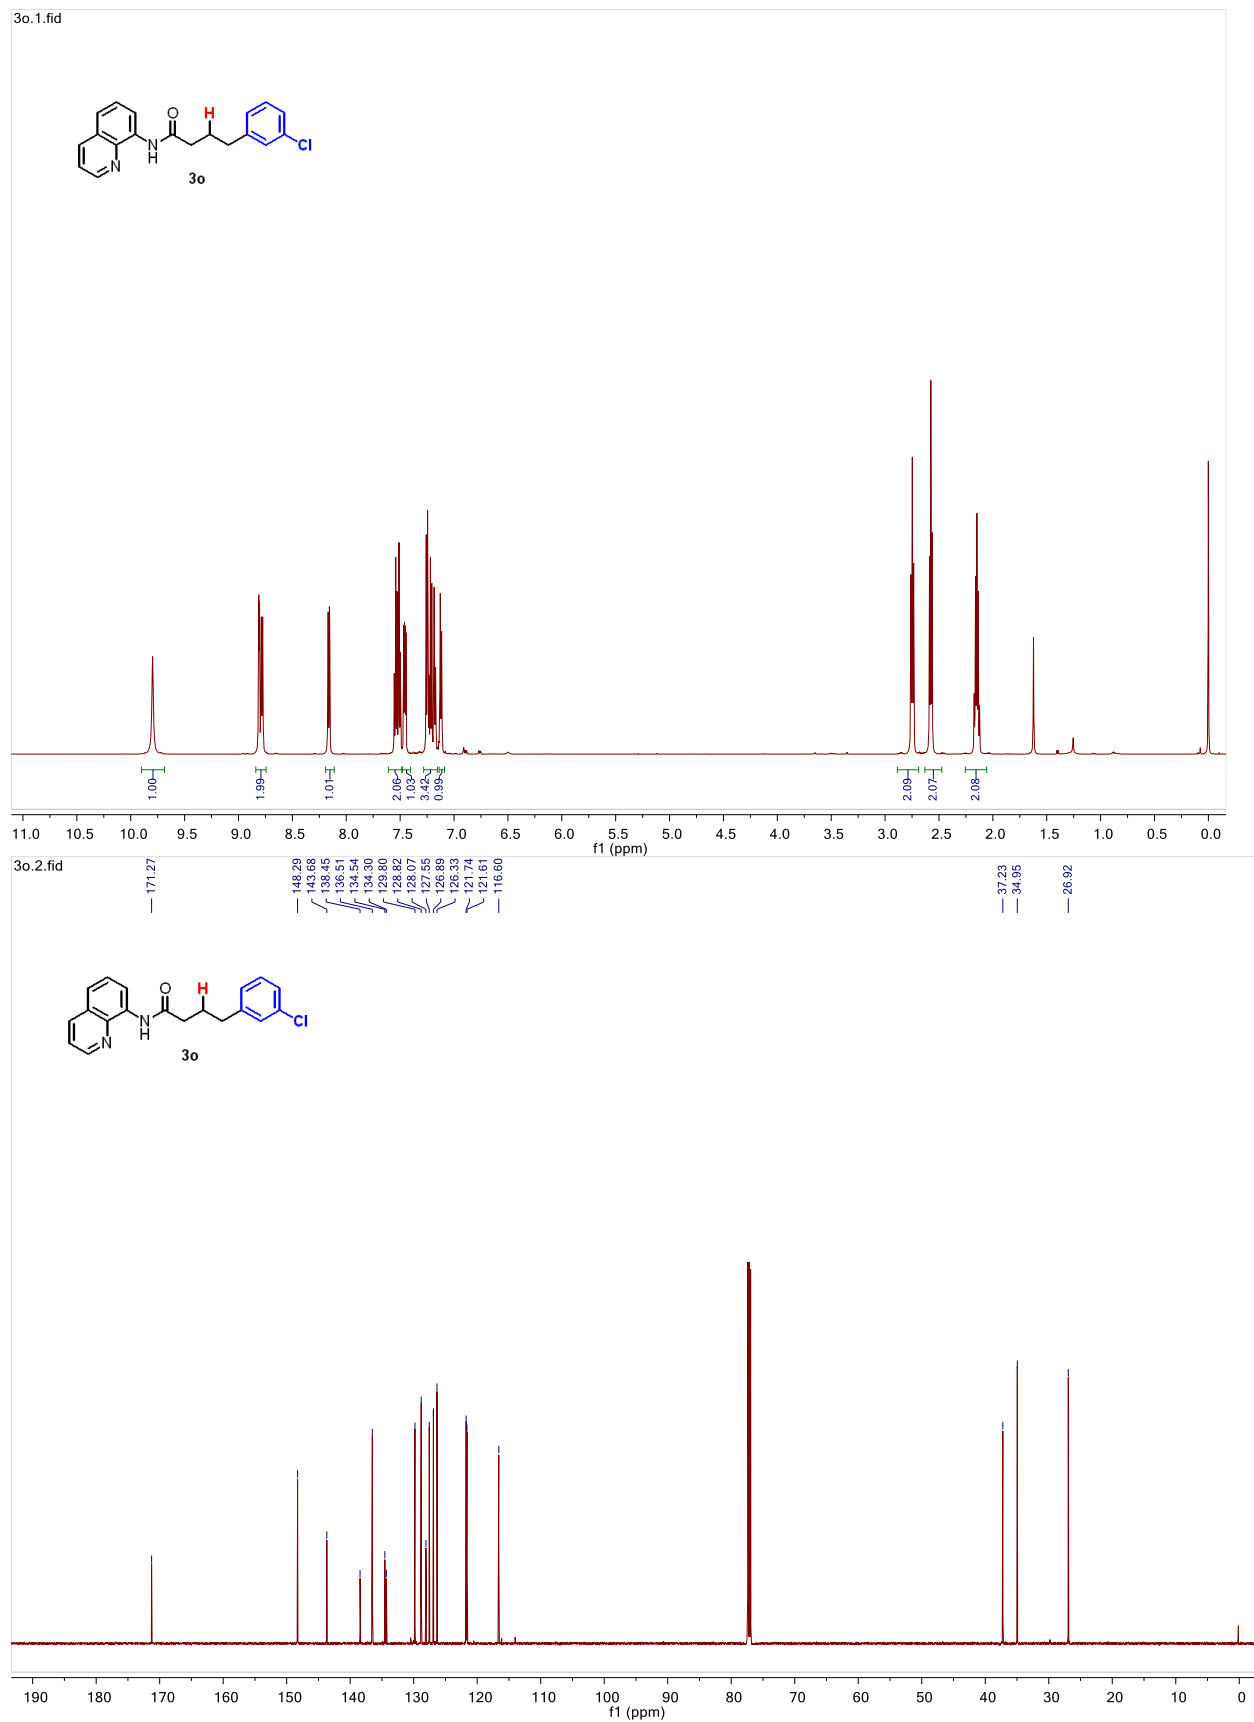

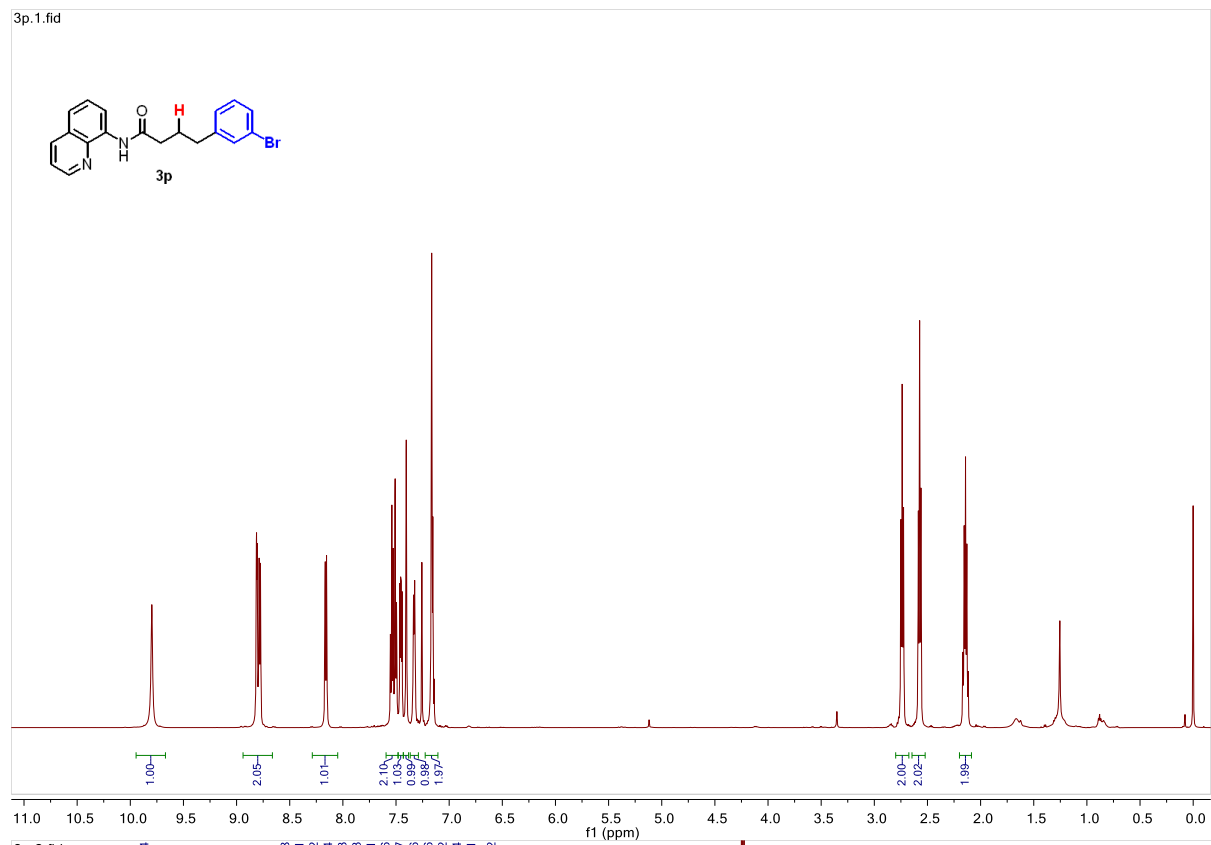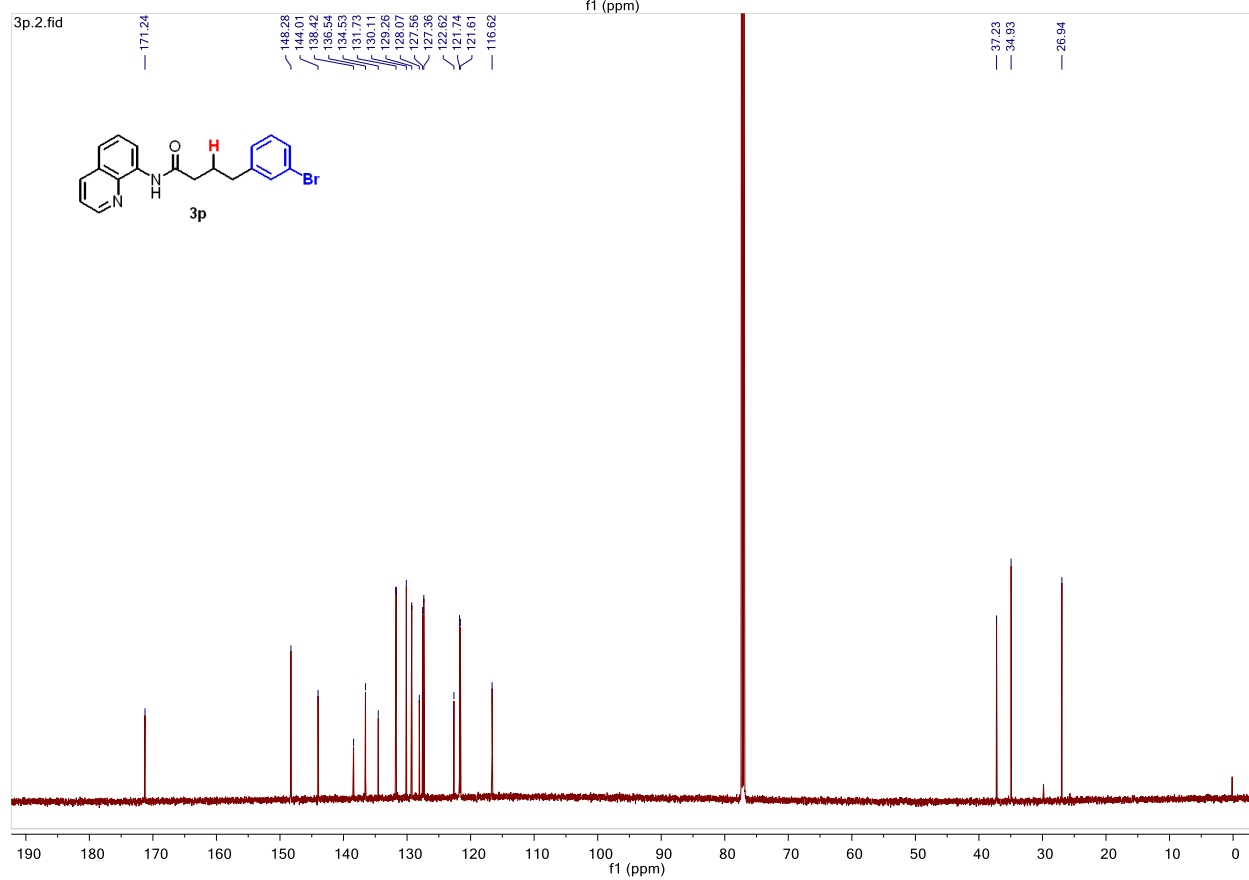

3q.1.fid

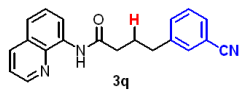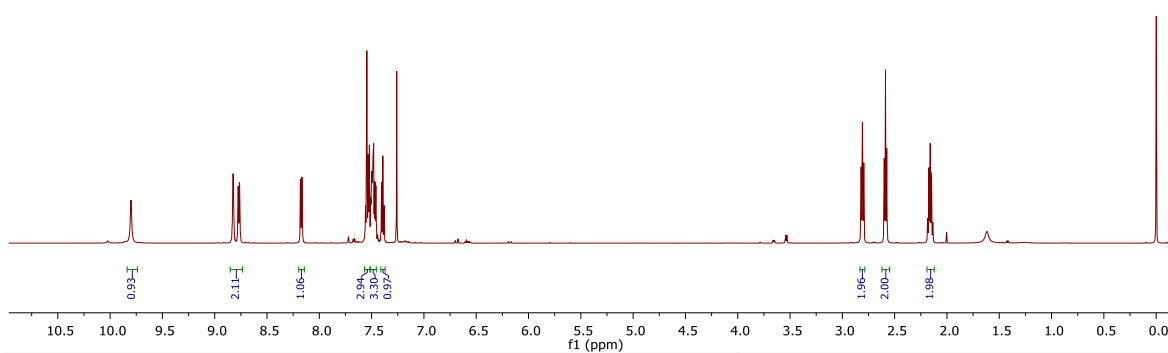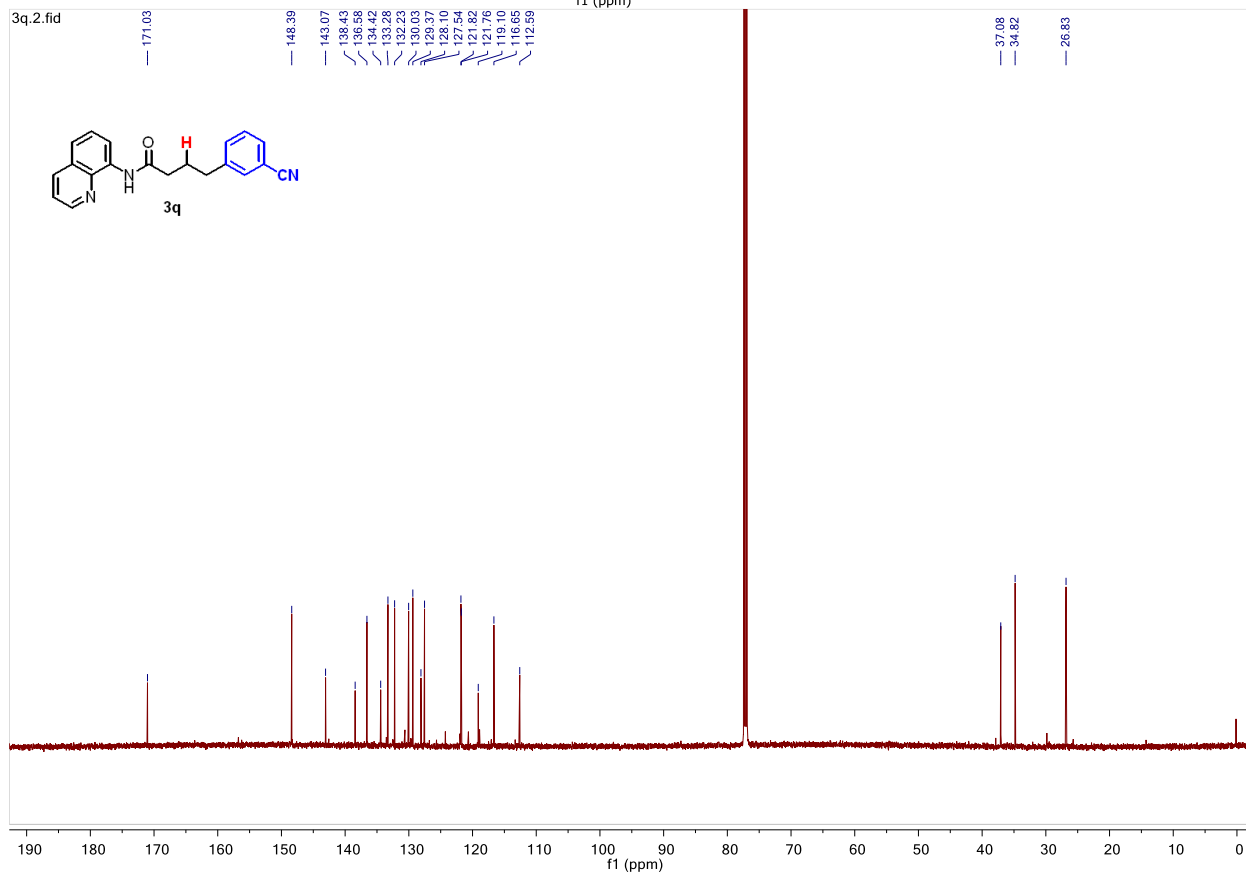

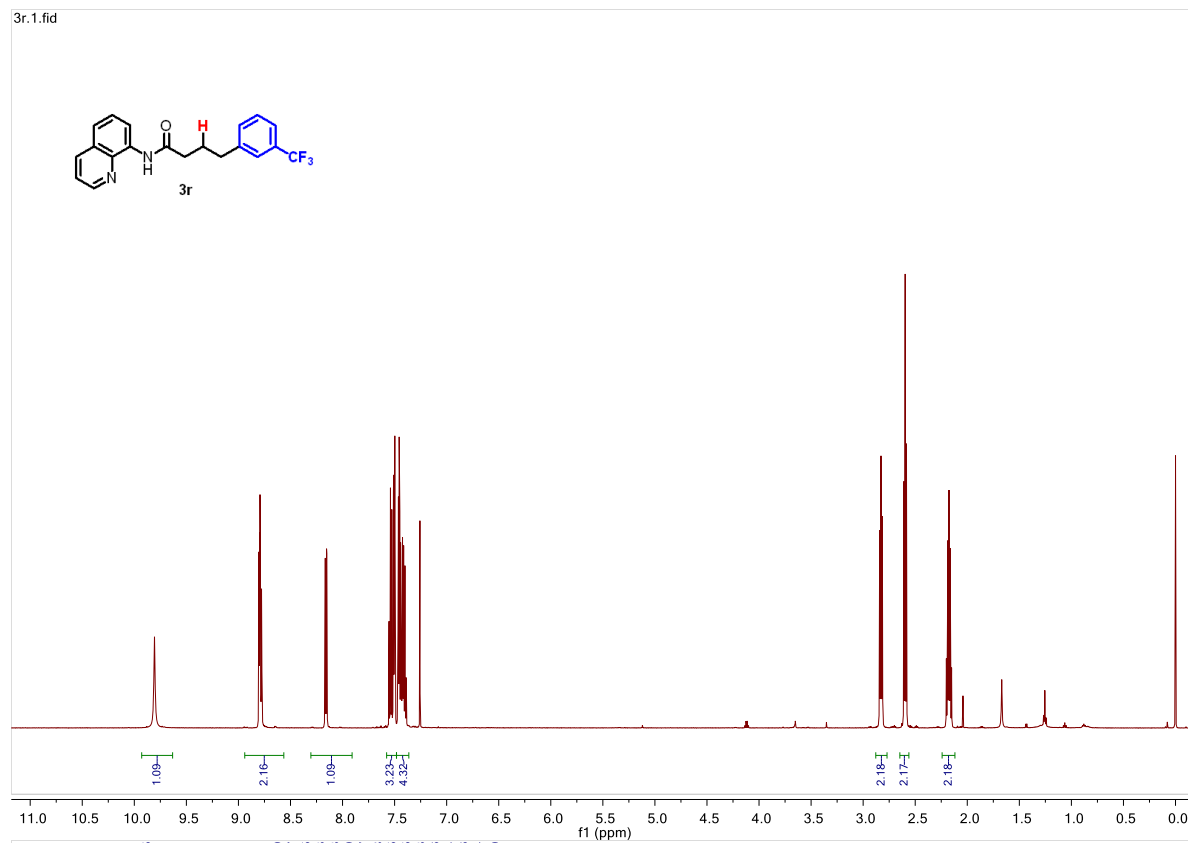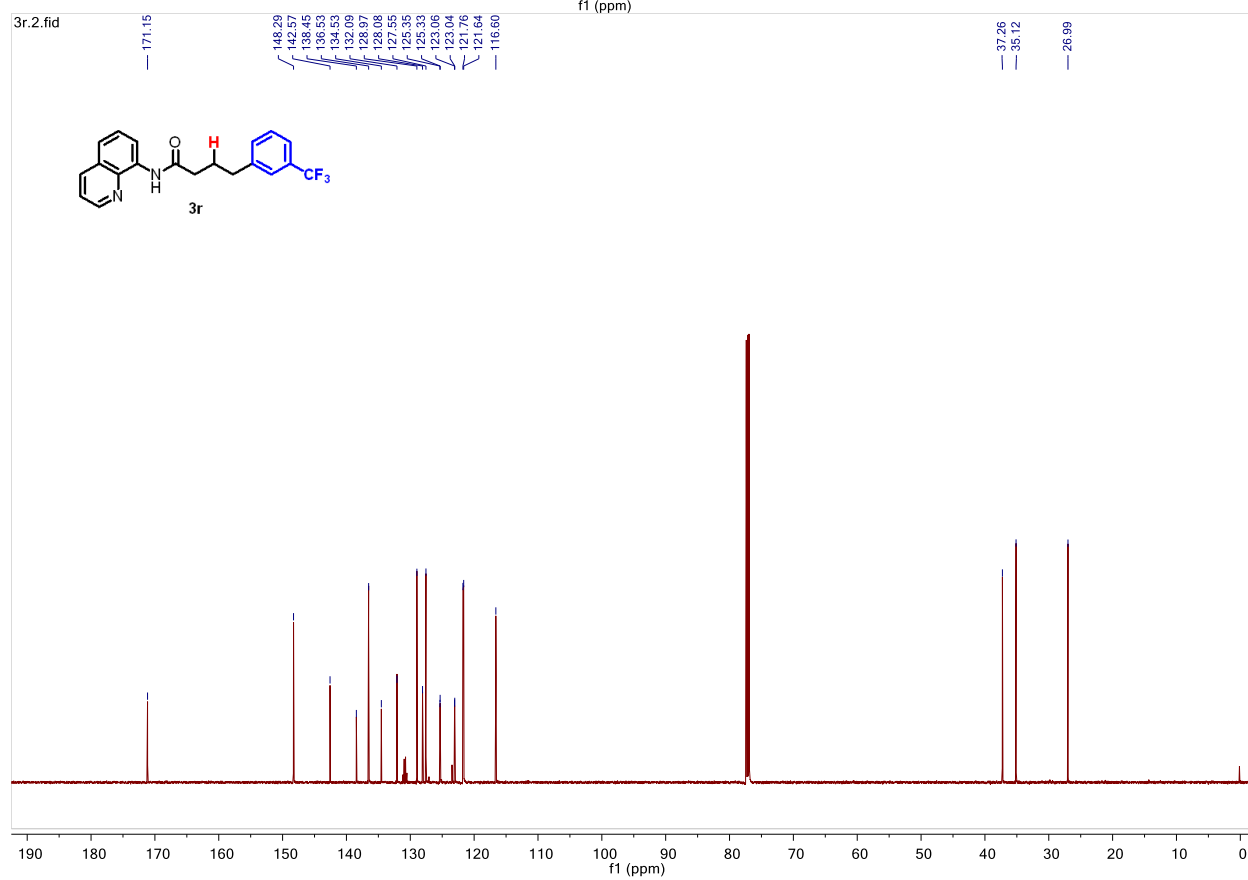

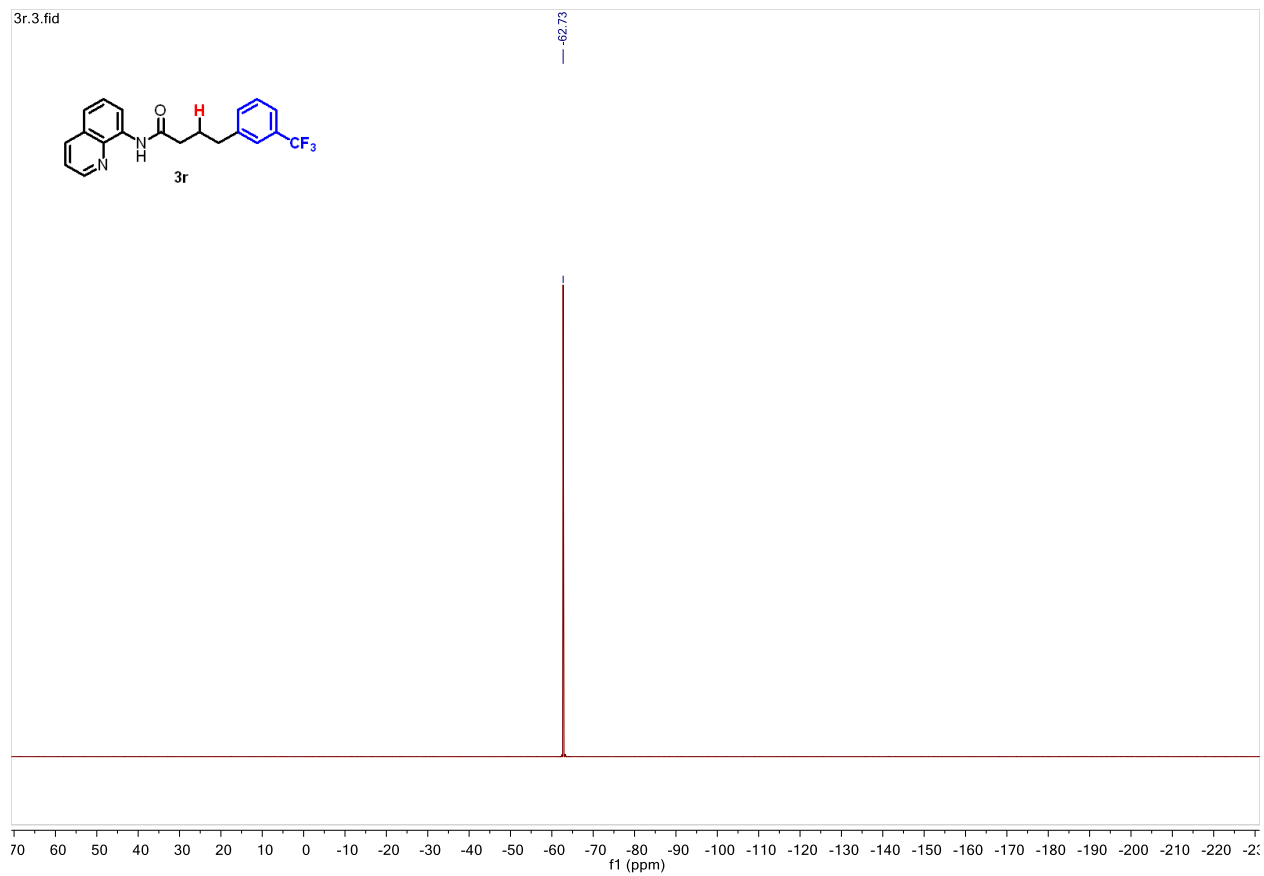

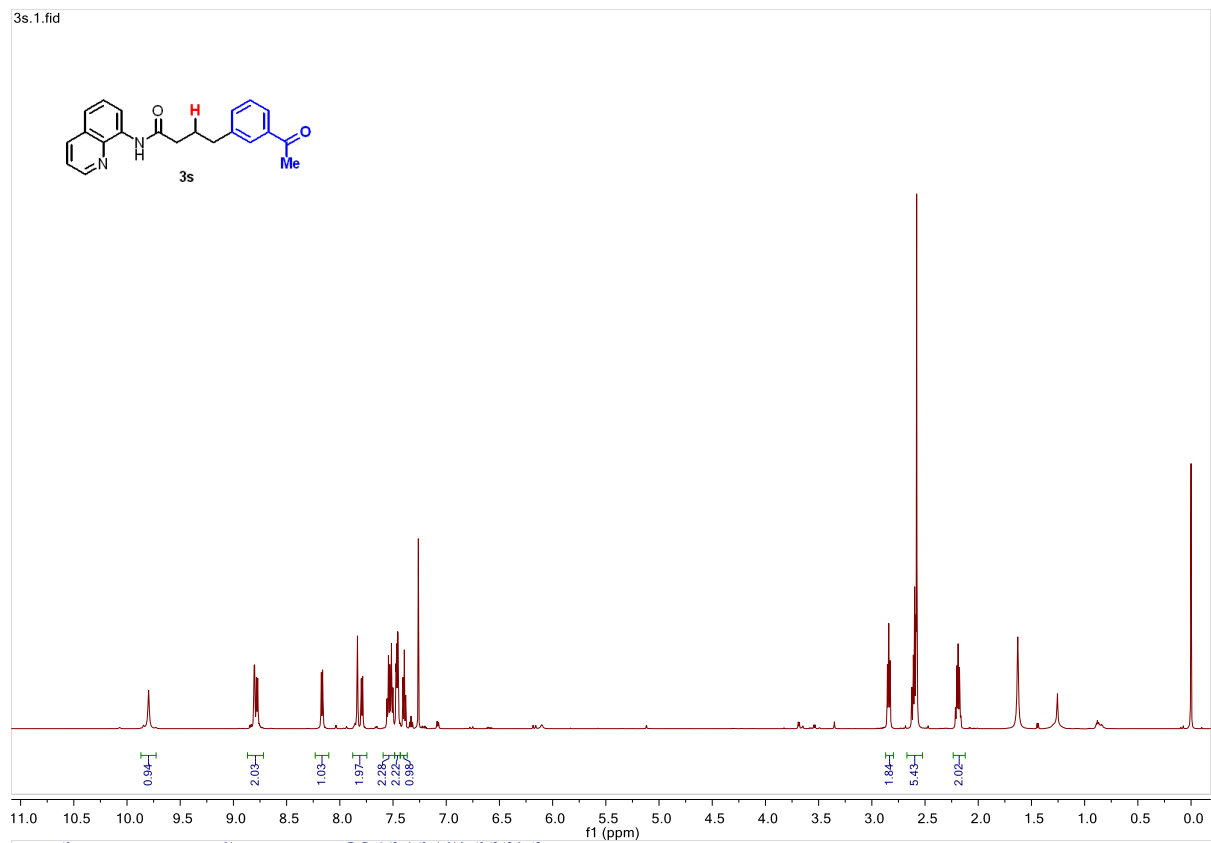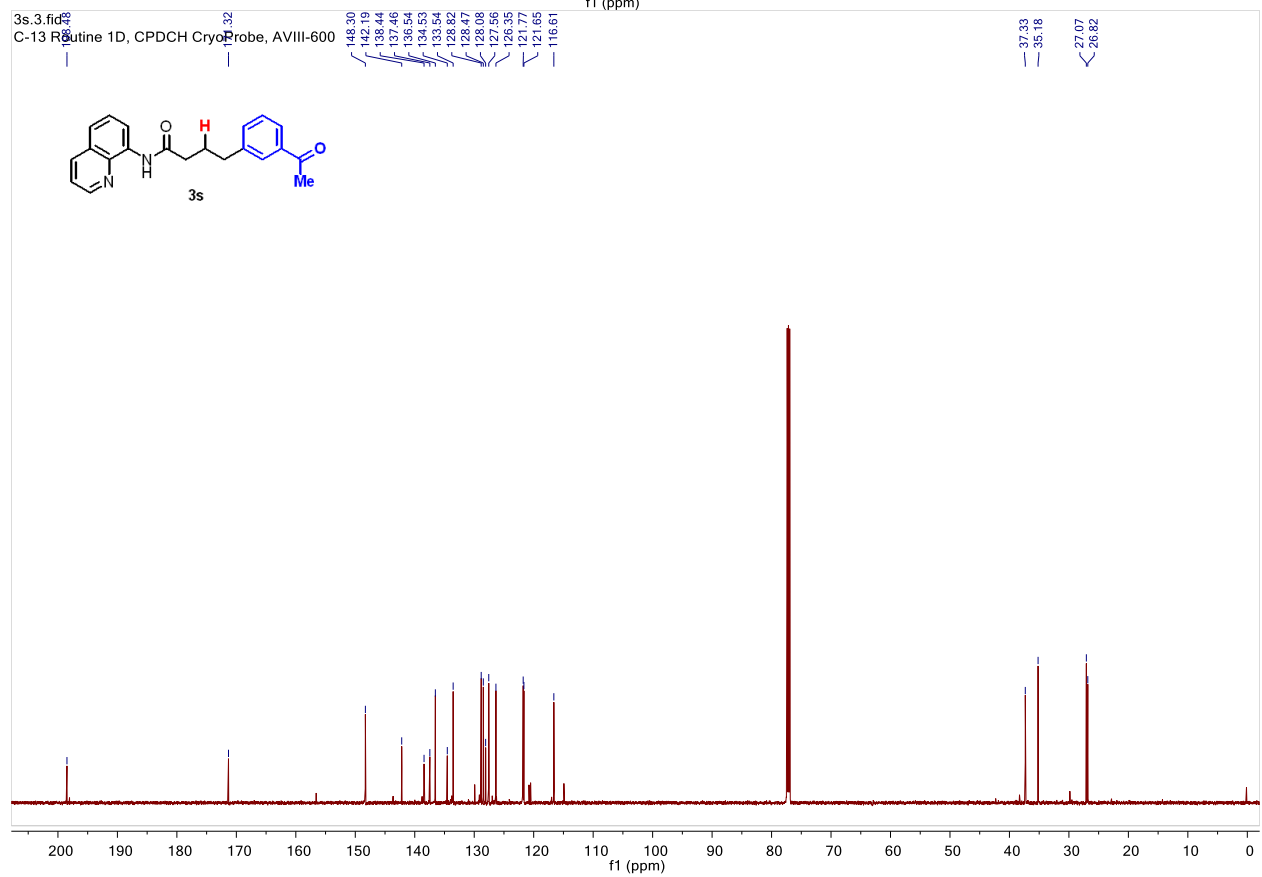

RM-248a-2-pure.1.fid

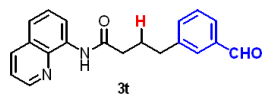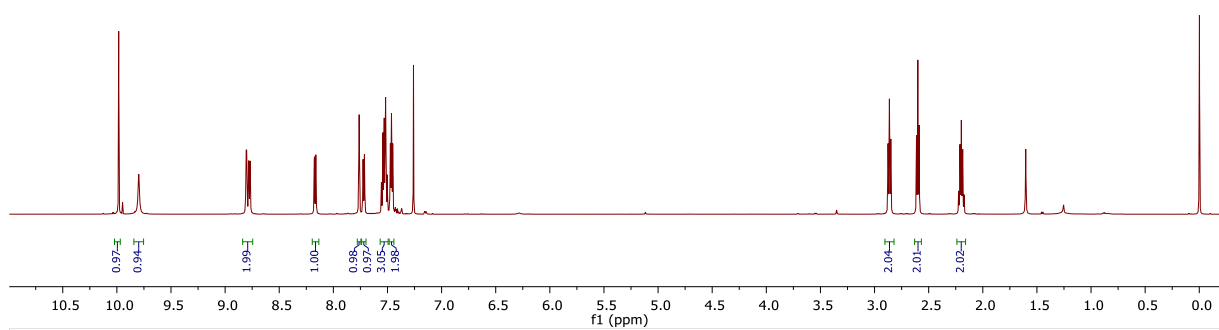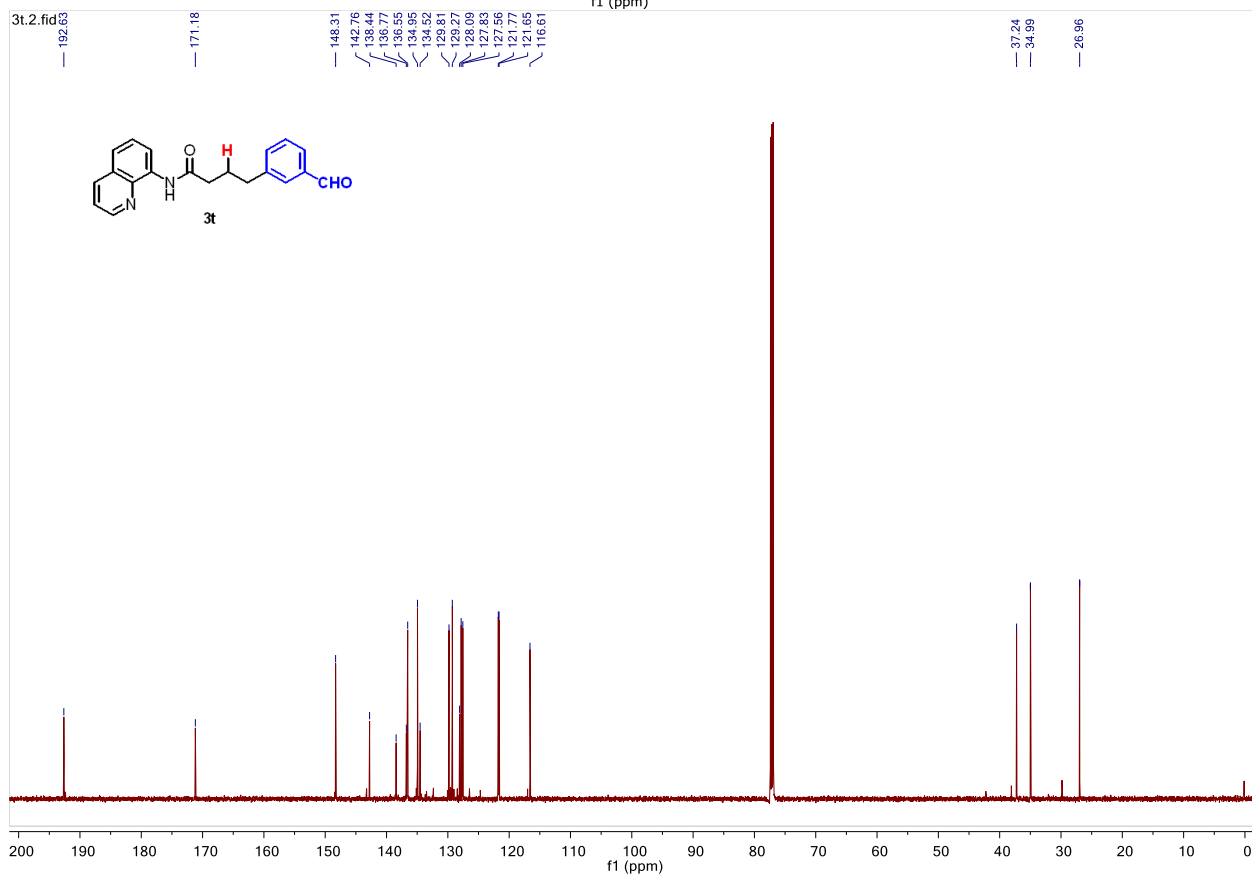



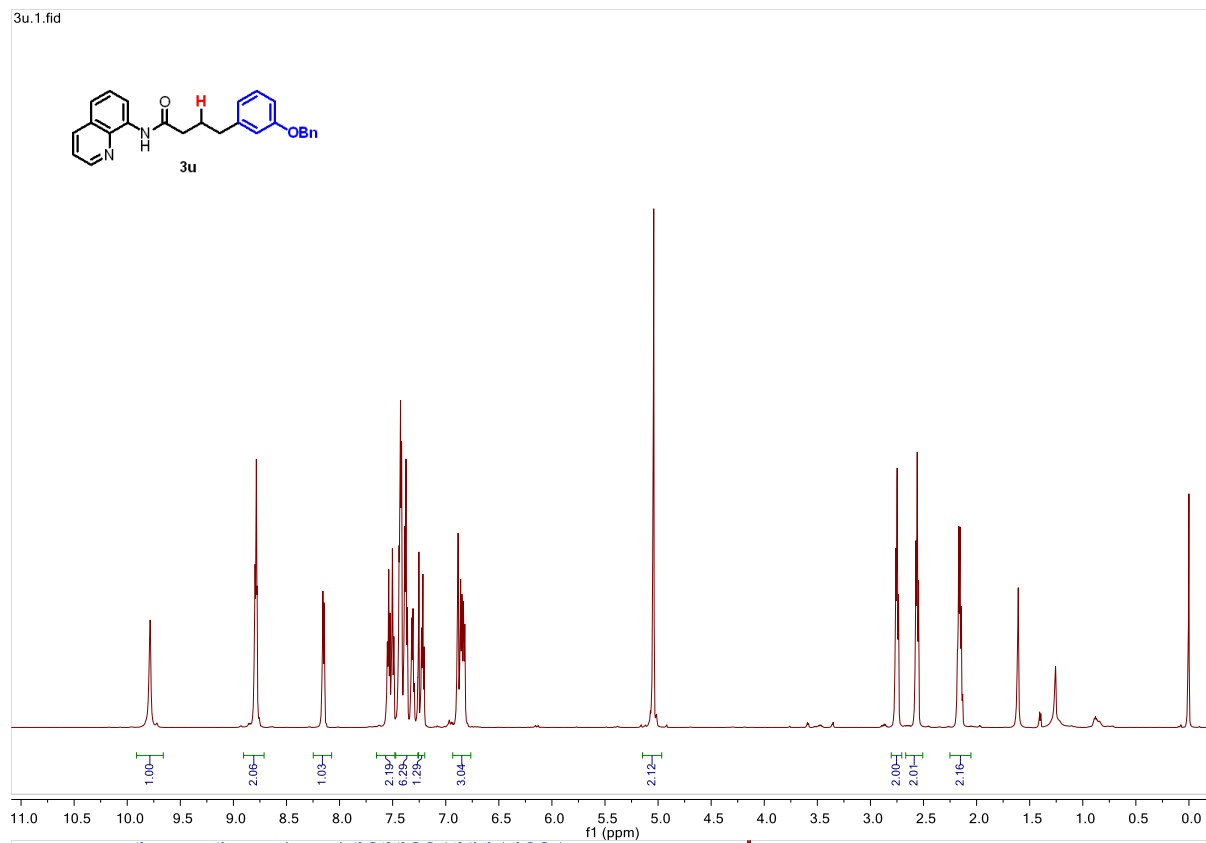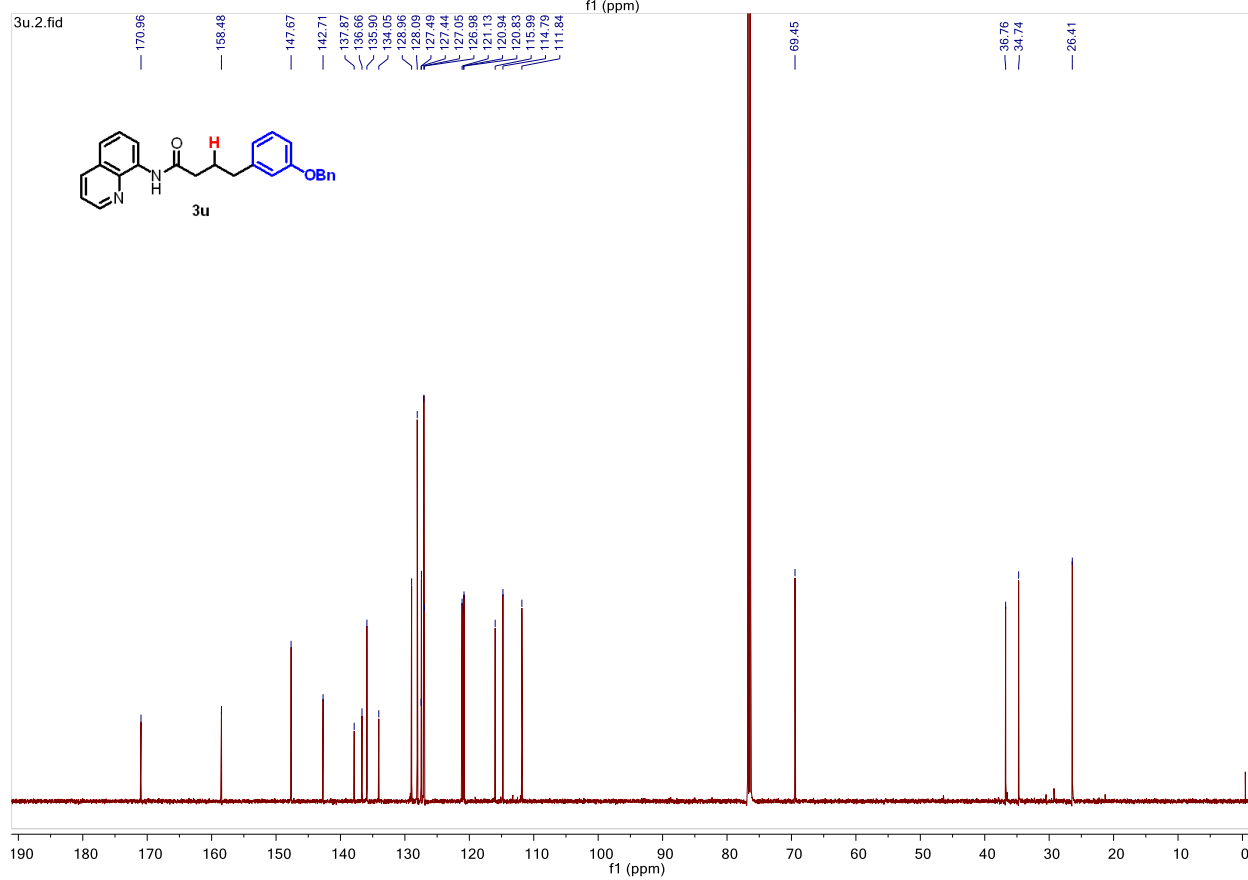

3v.1.fid

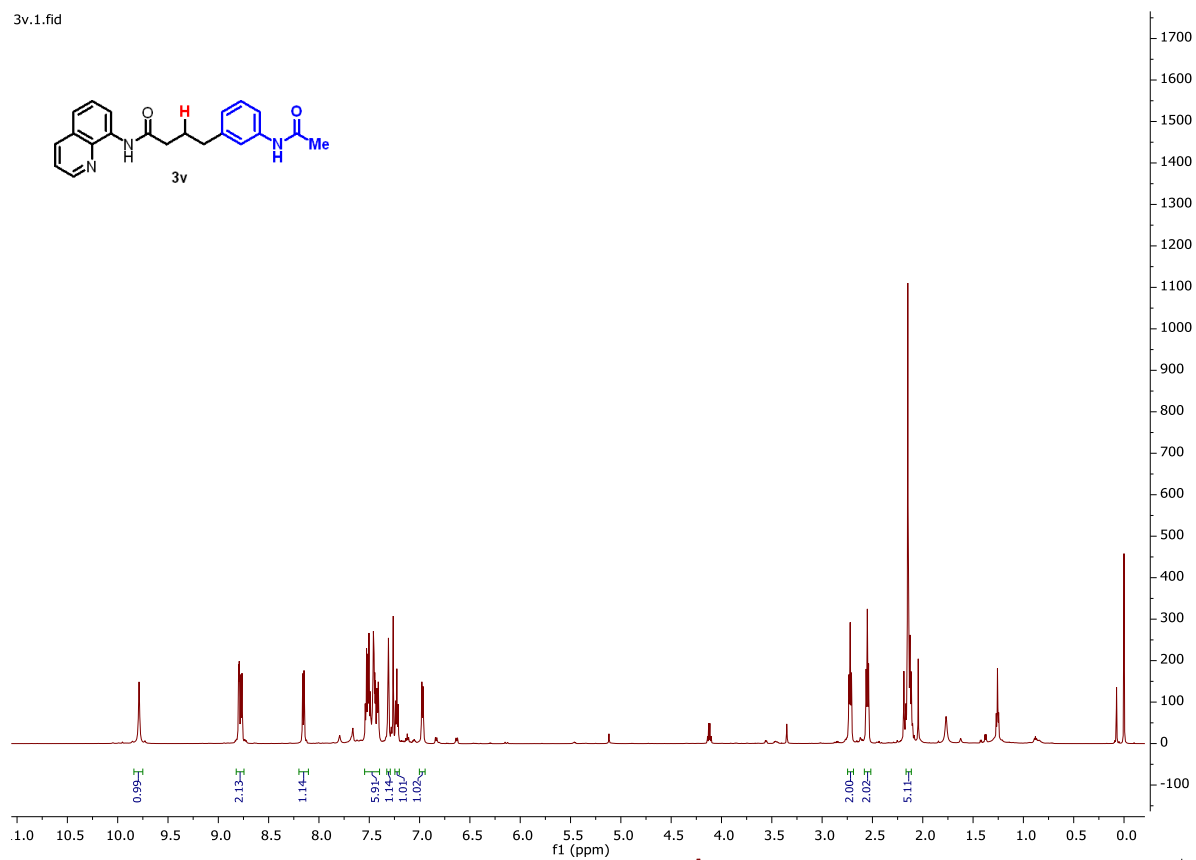

3v.2.fid

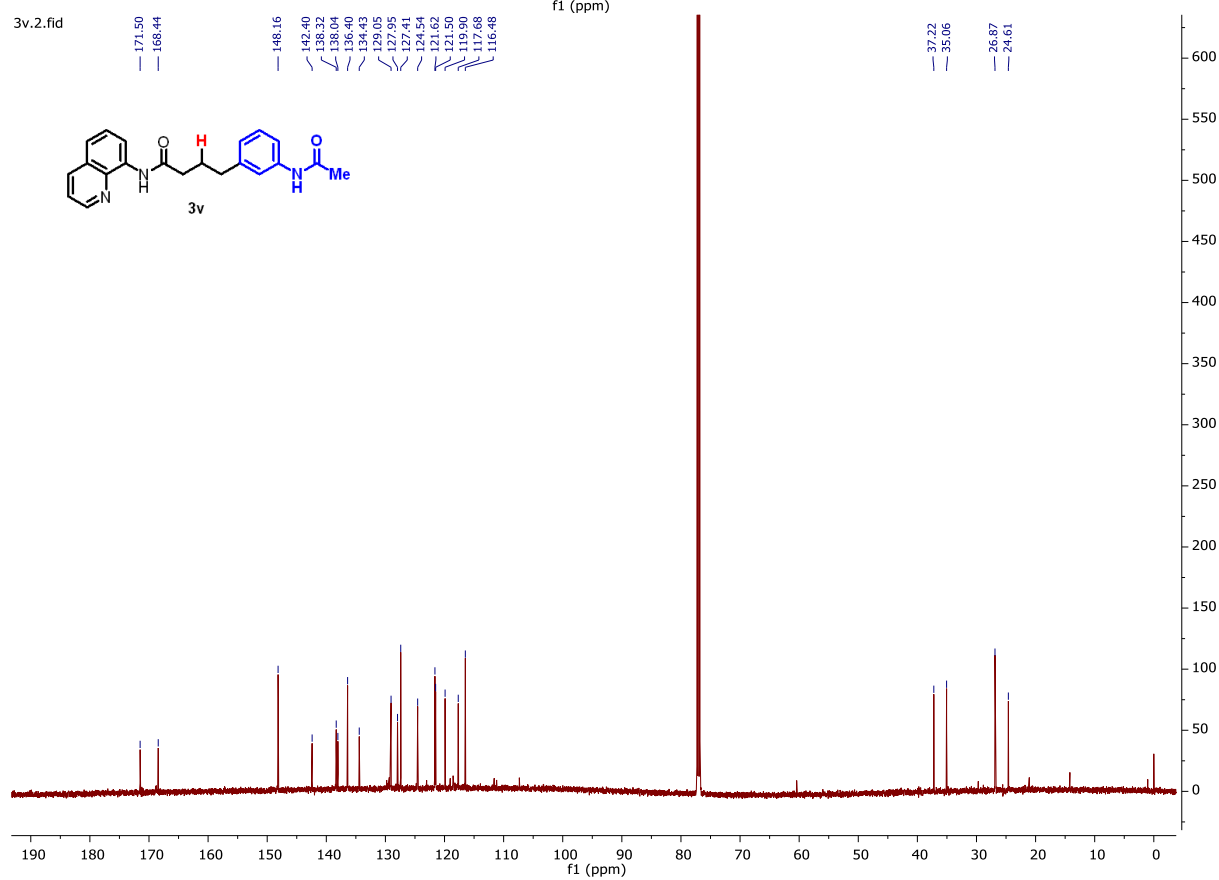

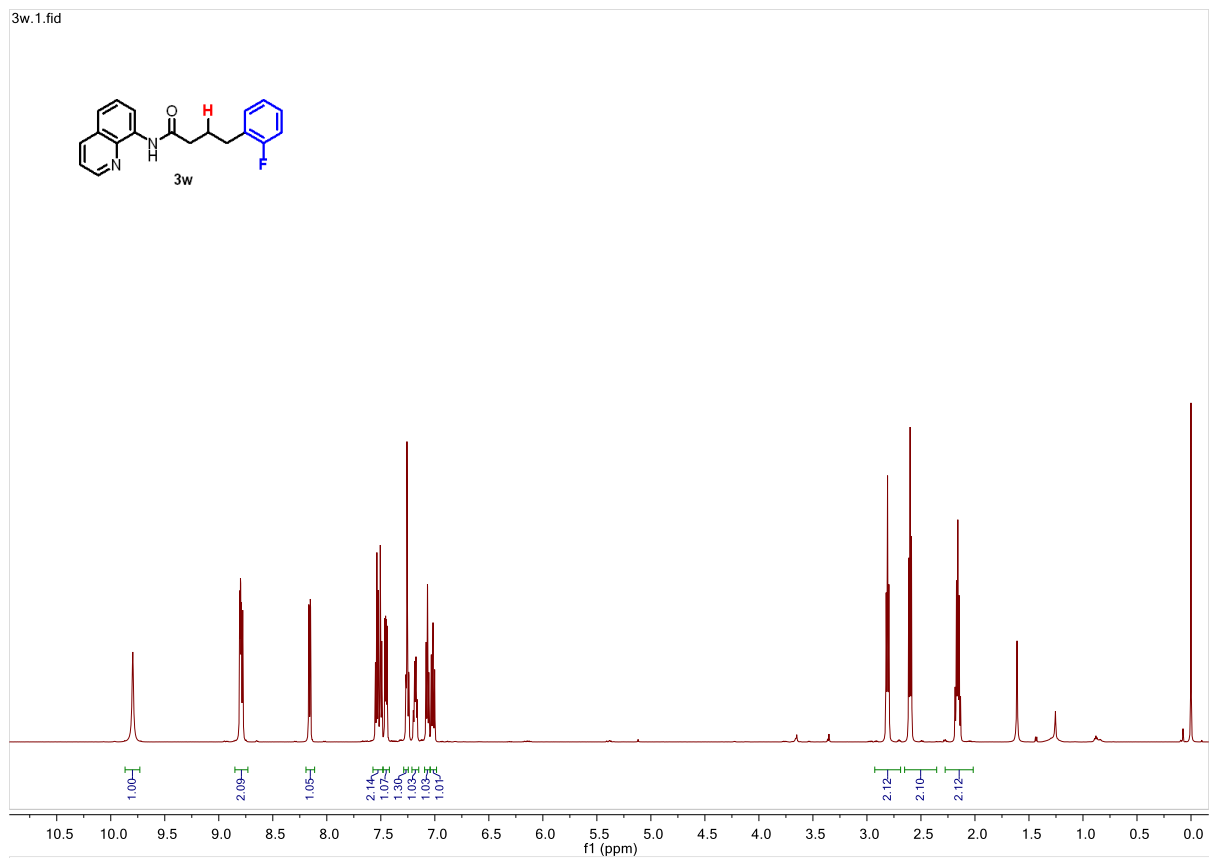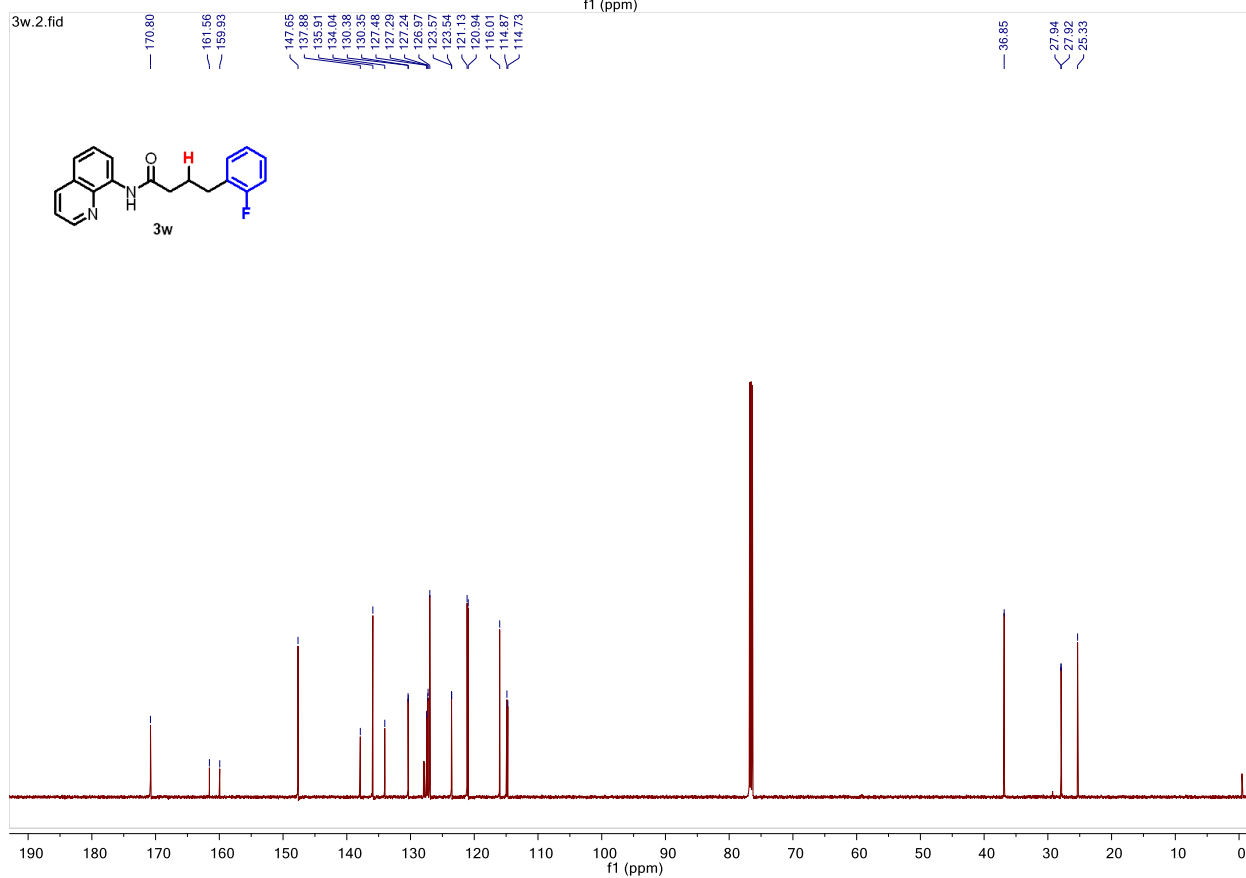

3w.3.fid

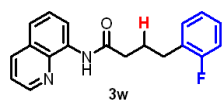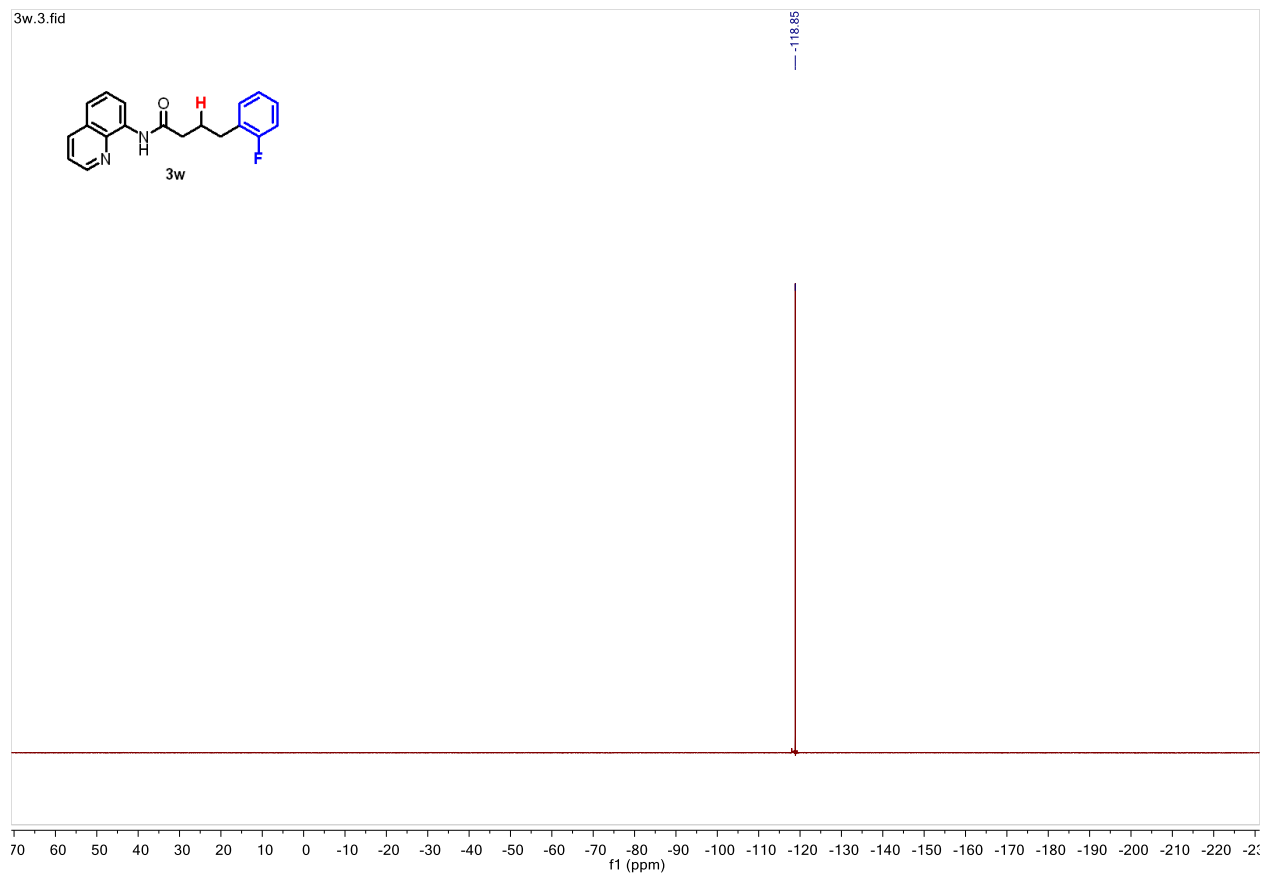

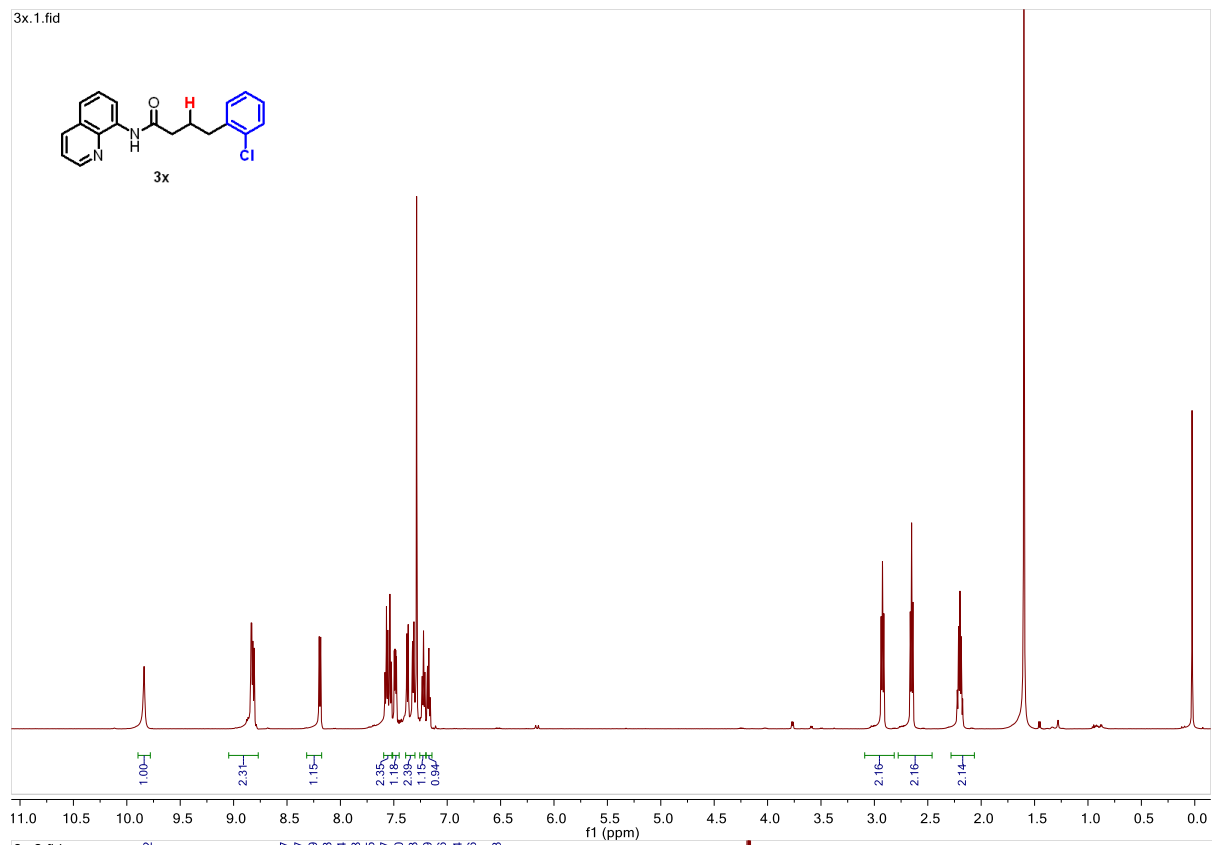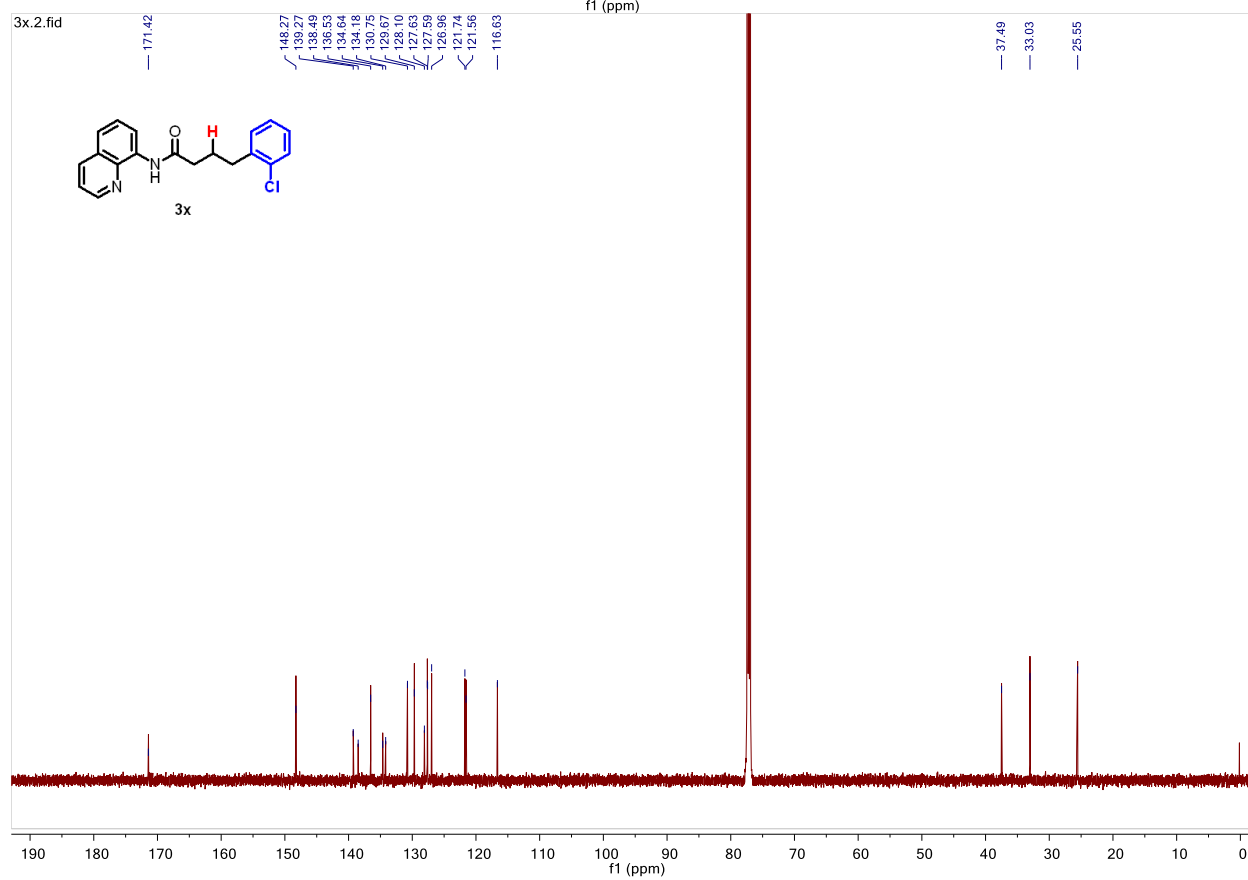

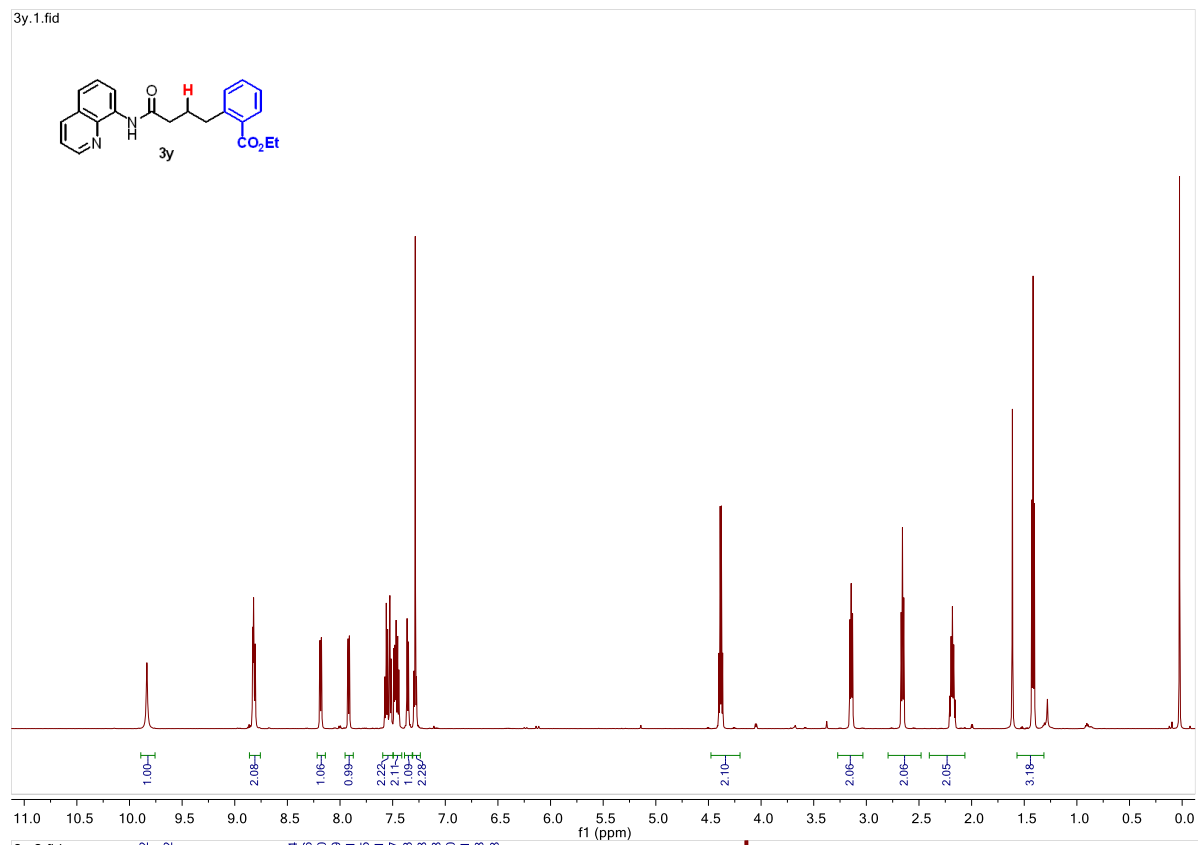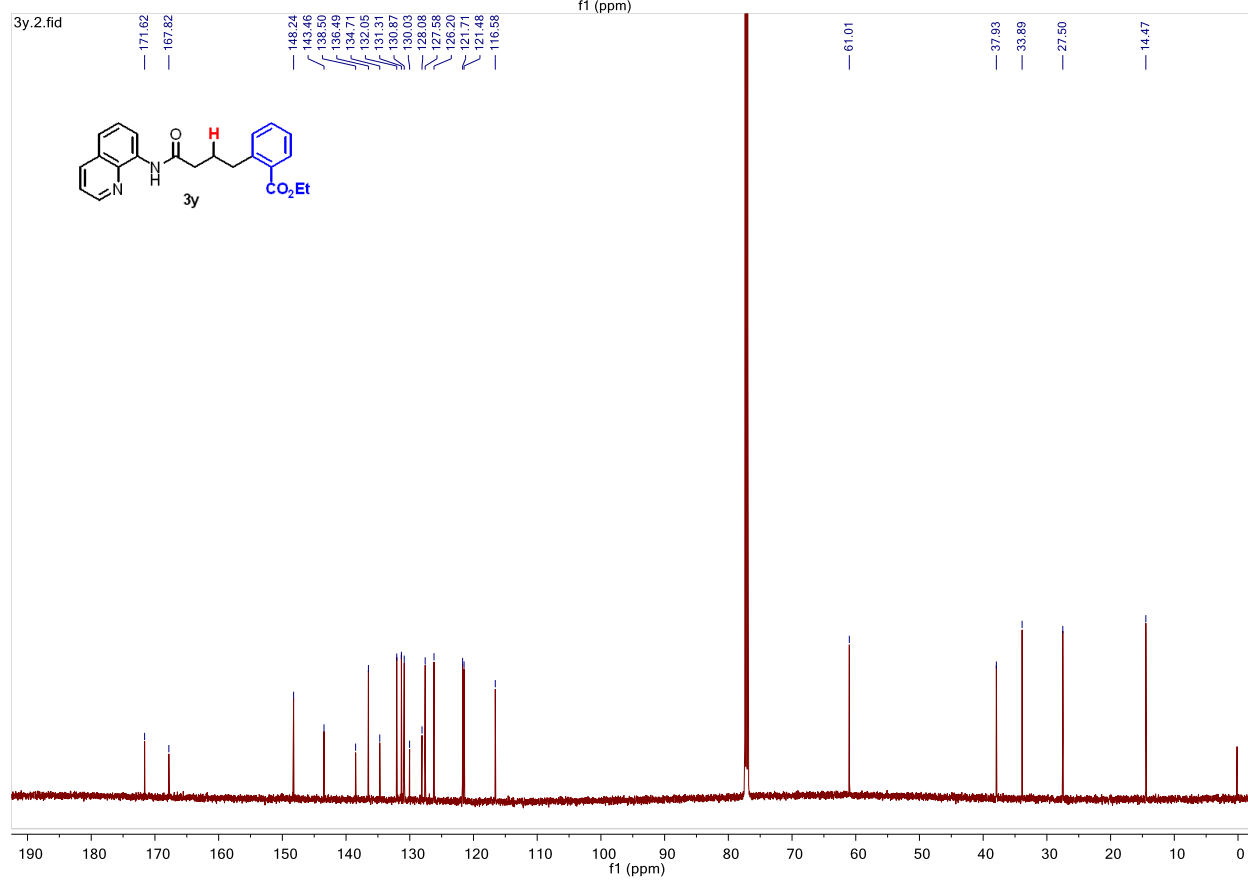

3aa, 2-OH.1.fid

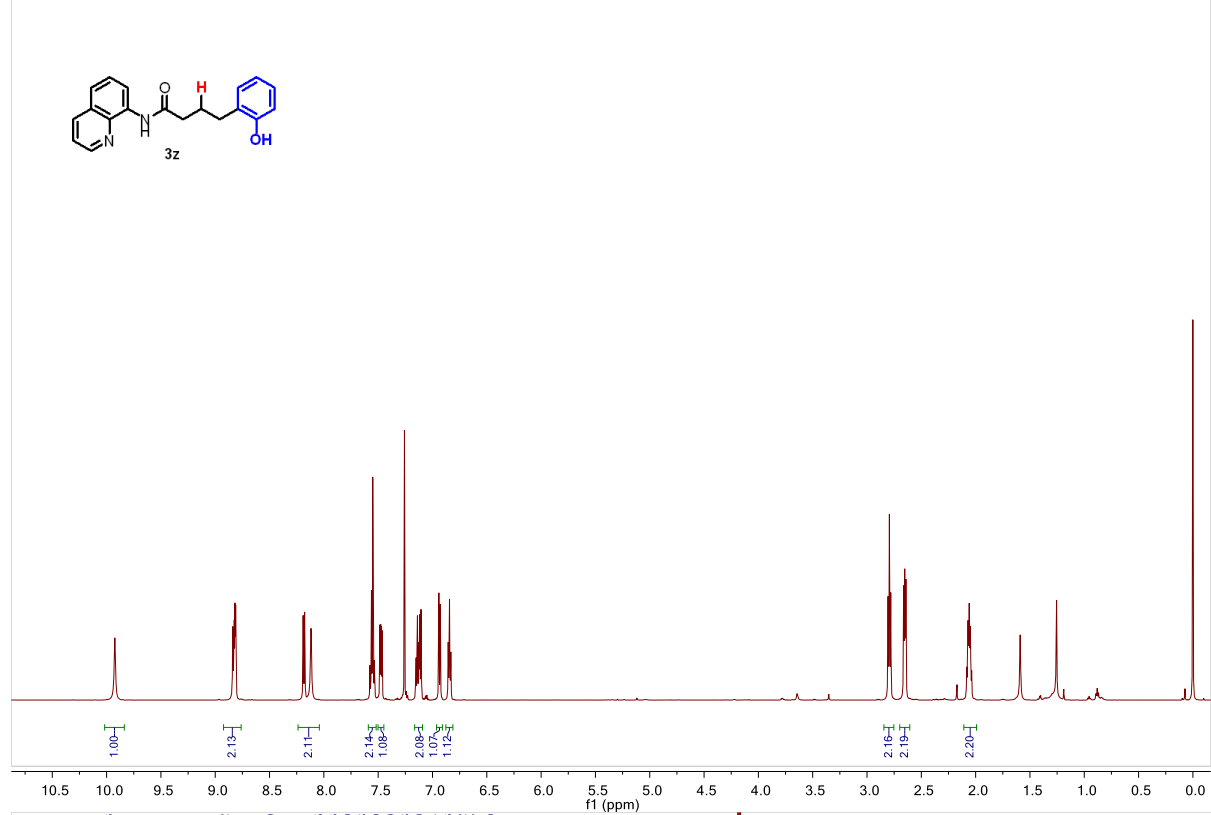

3aa, 2-OH.2.fid

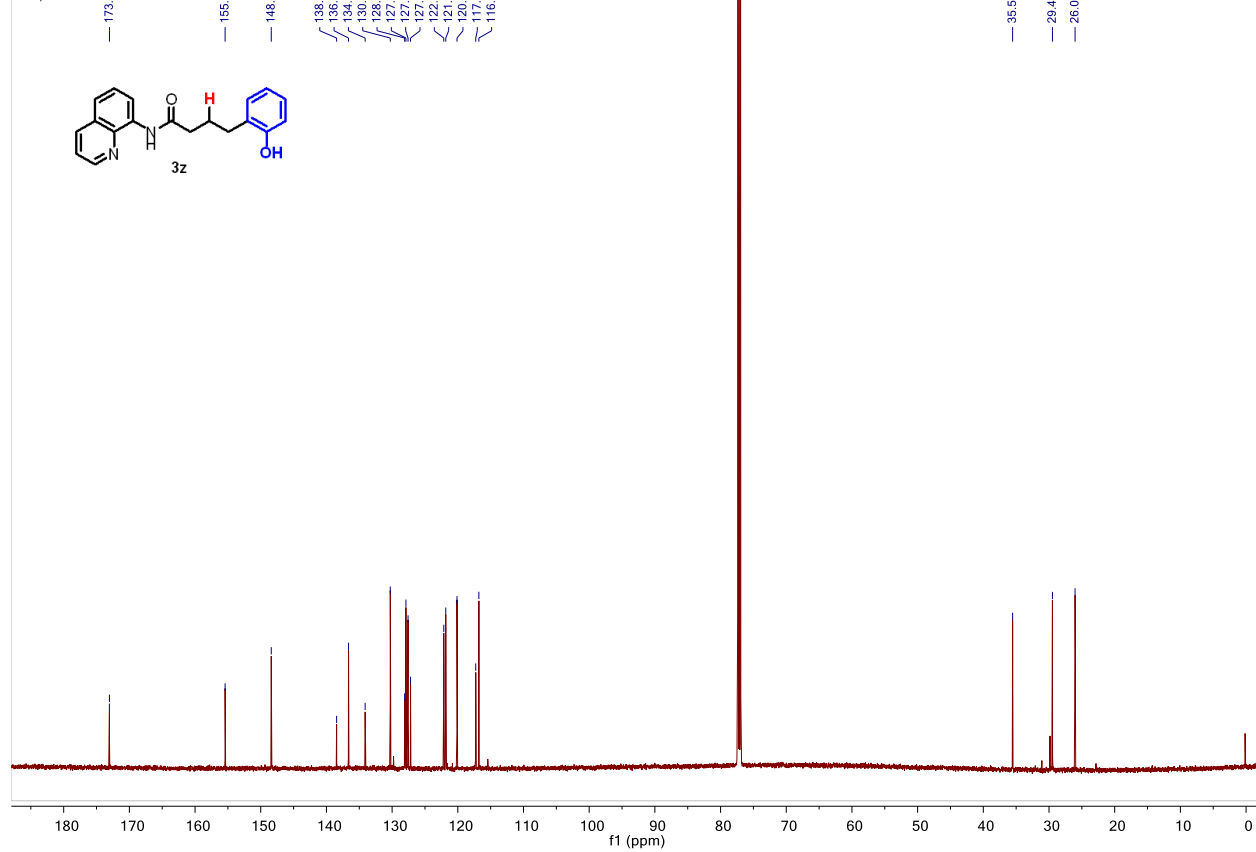

3ab, 3-5-CF3.1.fid

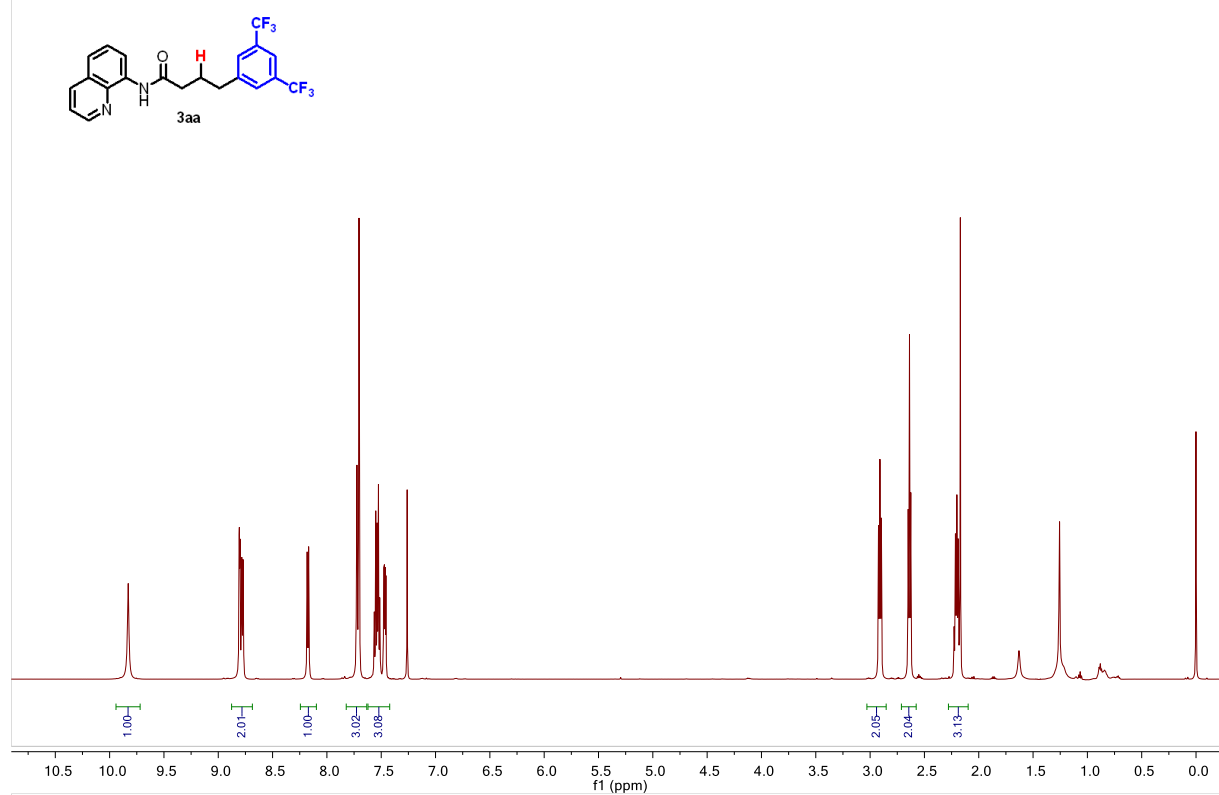

3ab, 3-5-CF3.2.fid

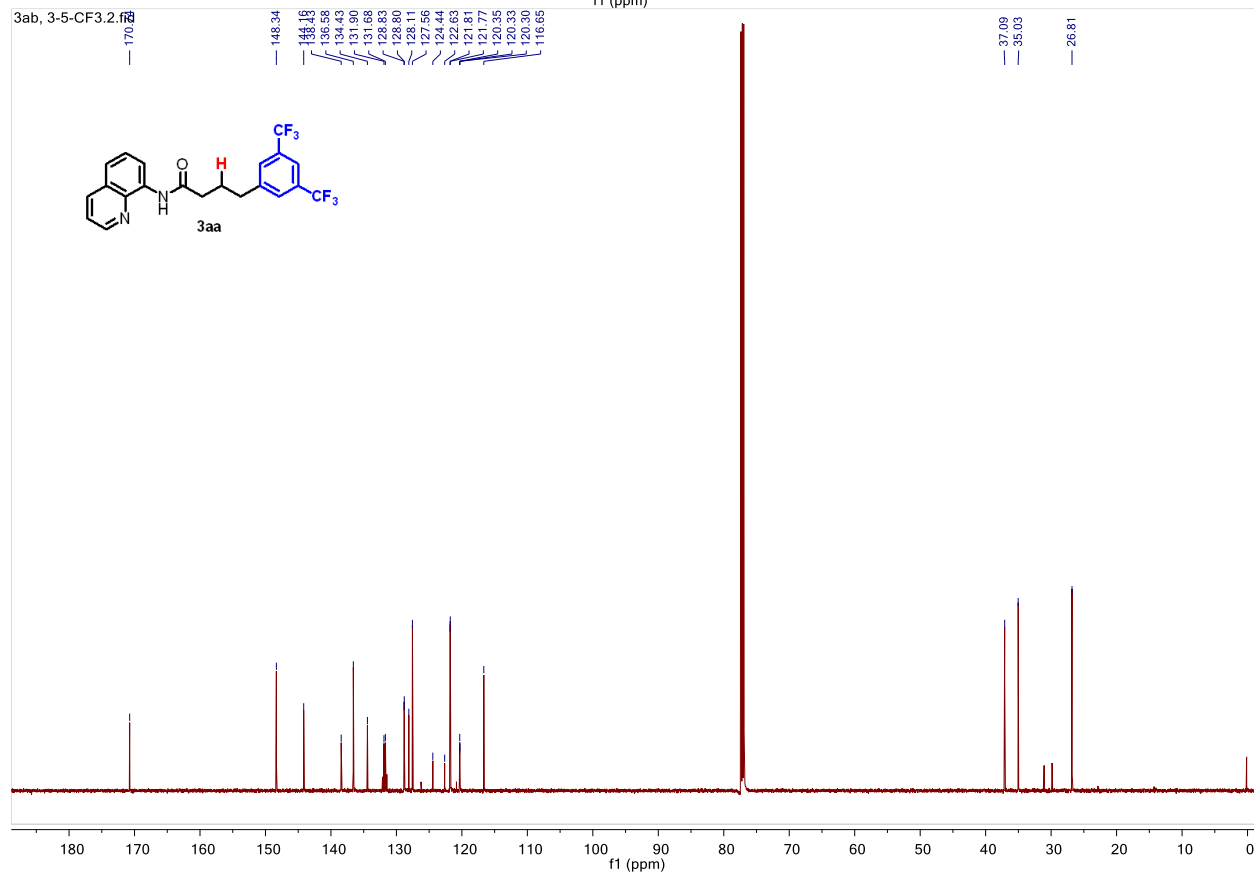



3ab, 3-5-CF3.5.fid  
AV400 BBOF Probe, F-19 in CDCl3, CFC13=0 ppm.

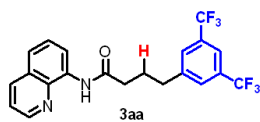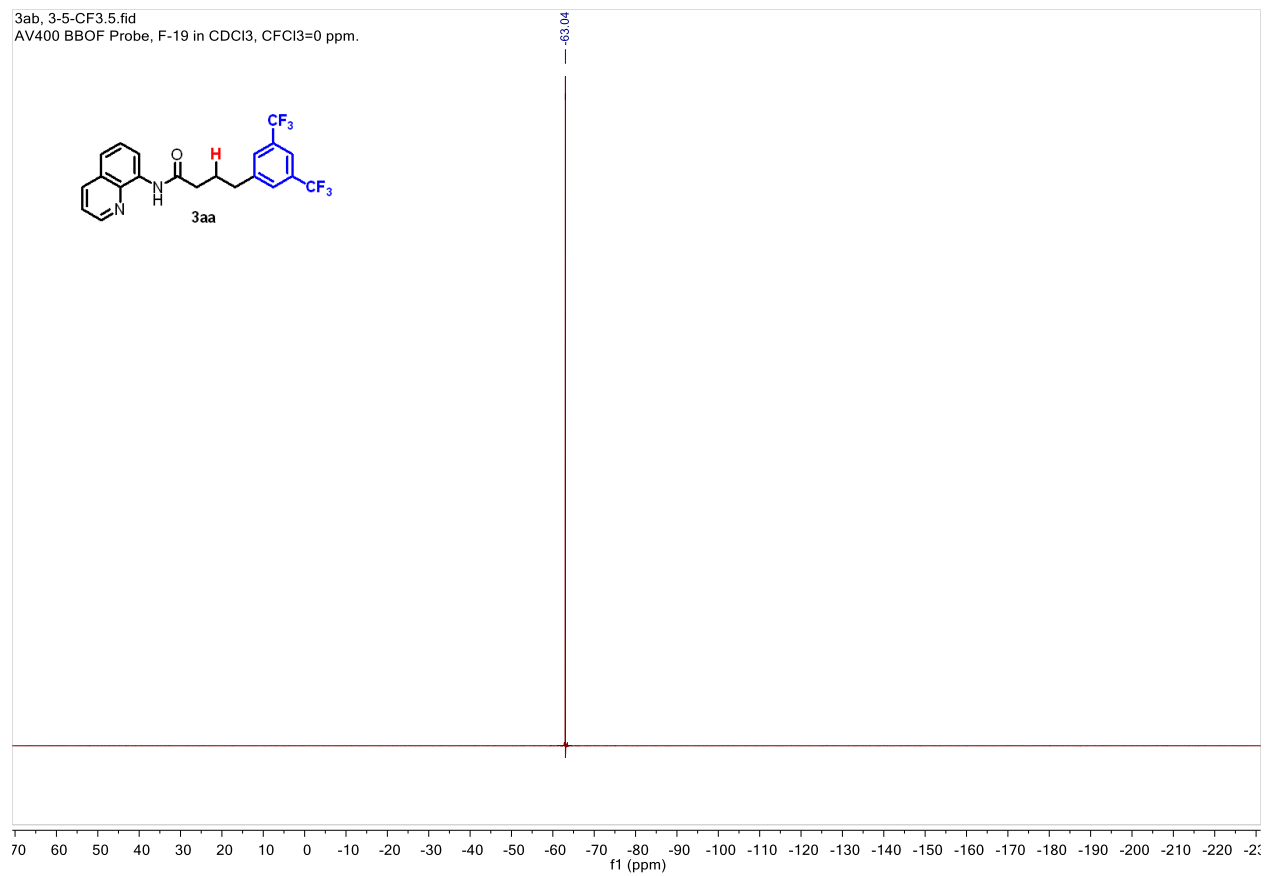

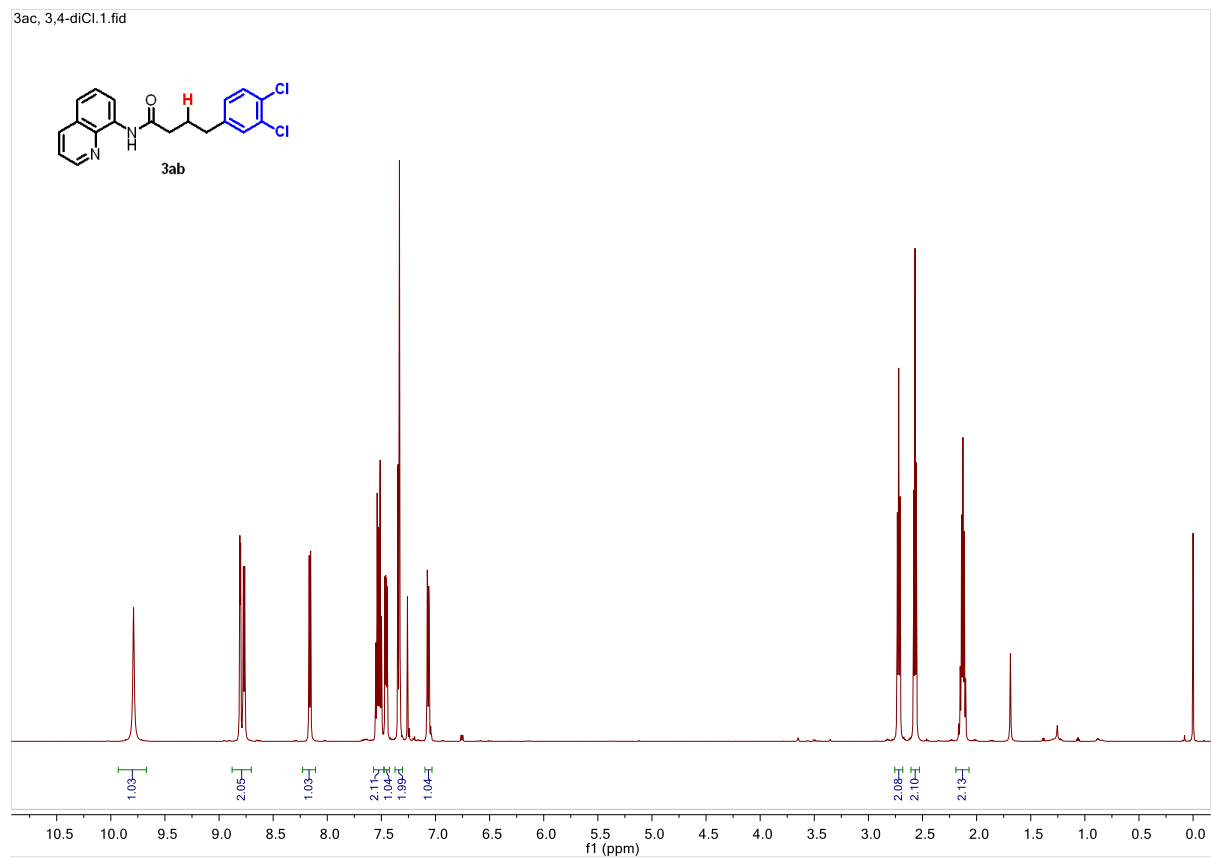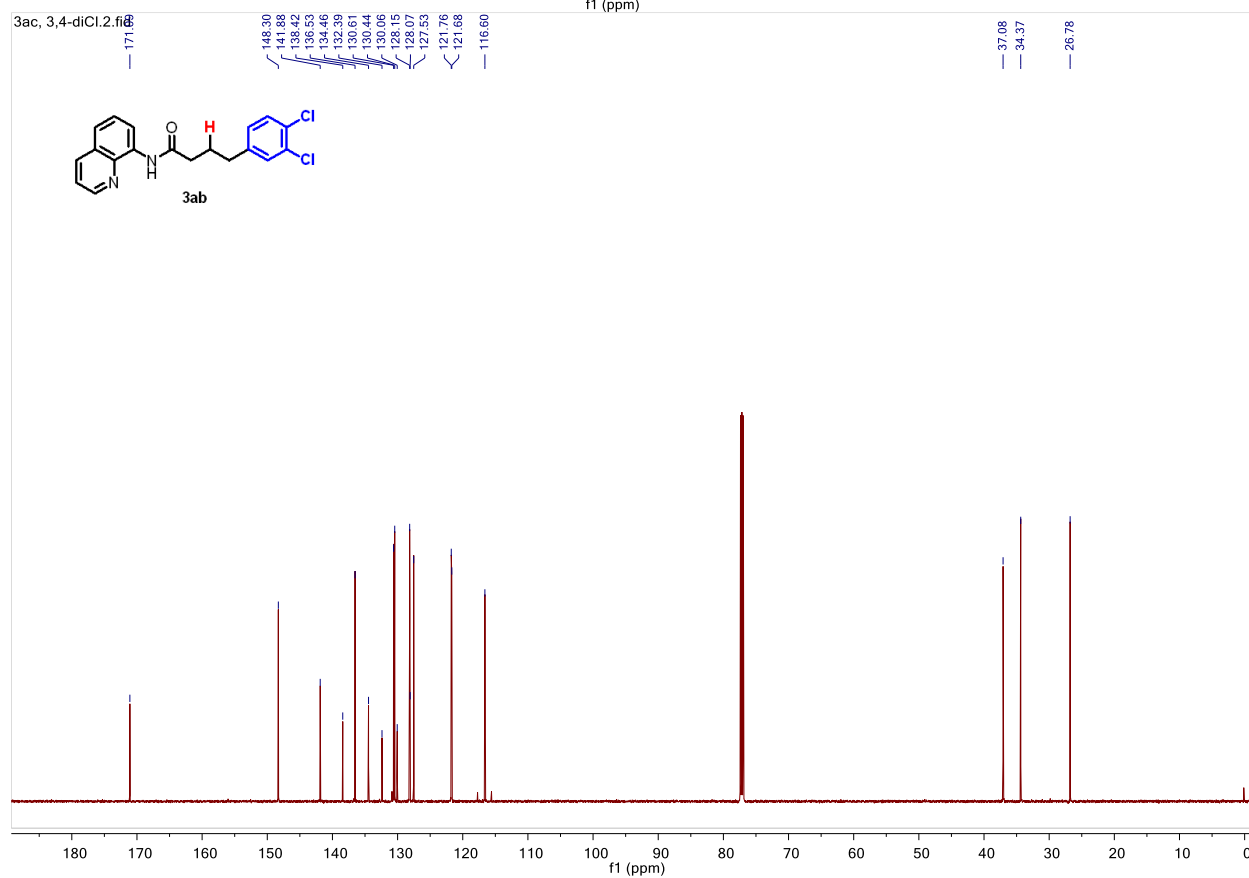

3ac.1.fid

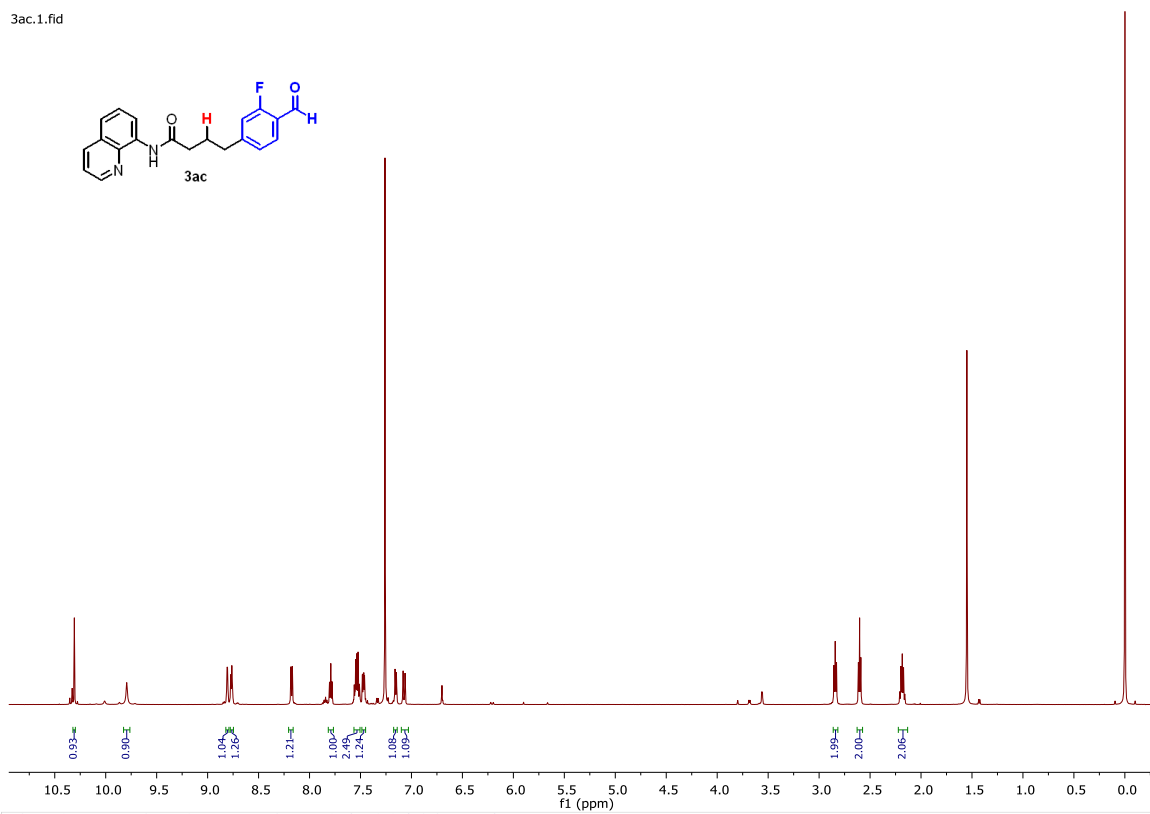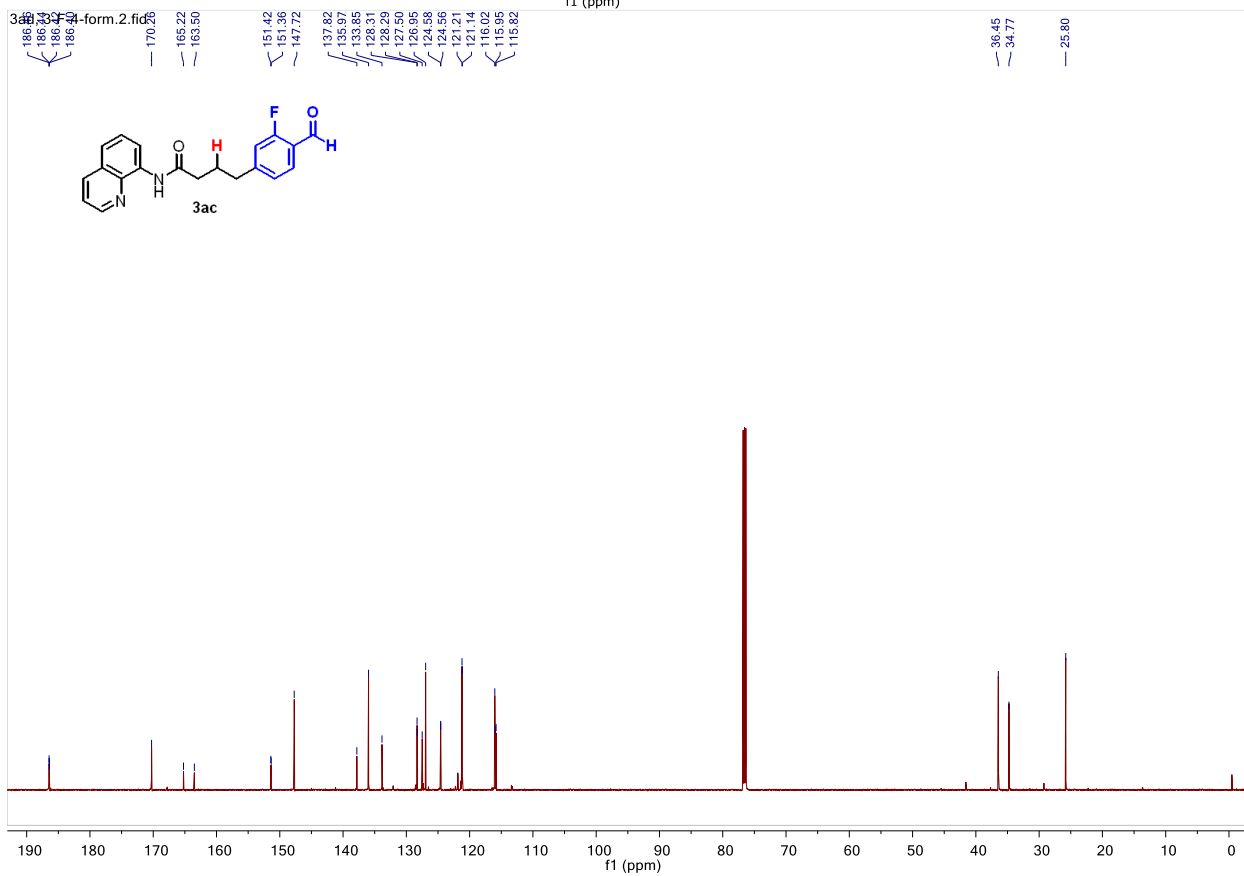

3ad, 3-F-4-form.3.fid

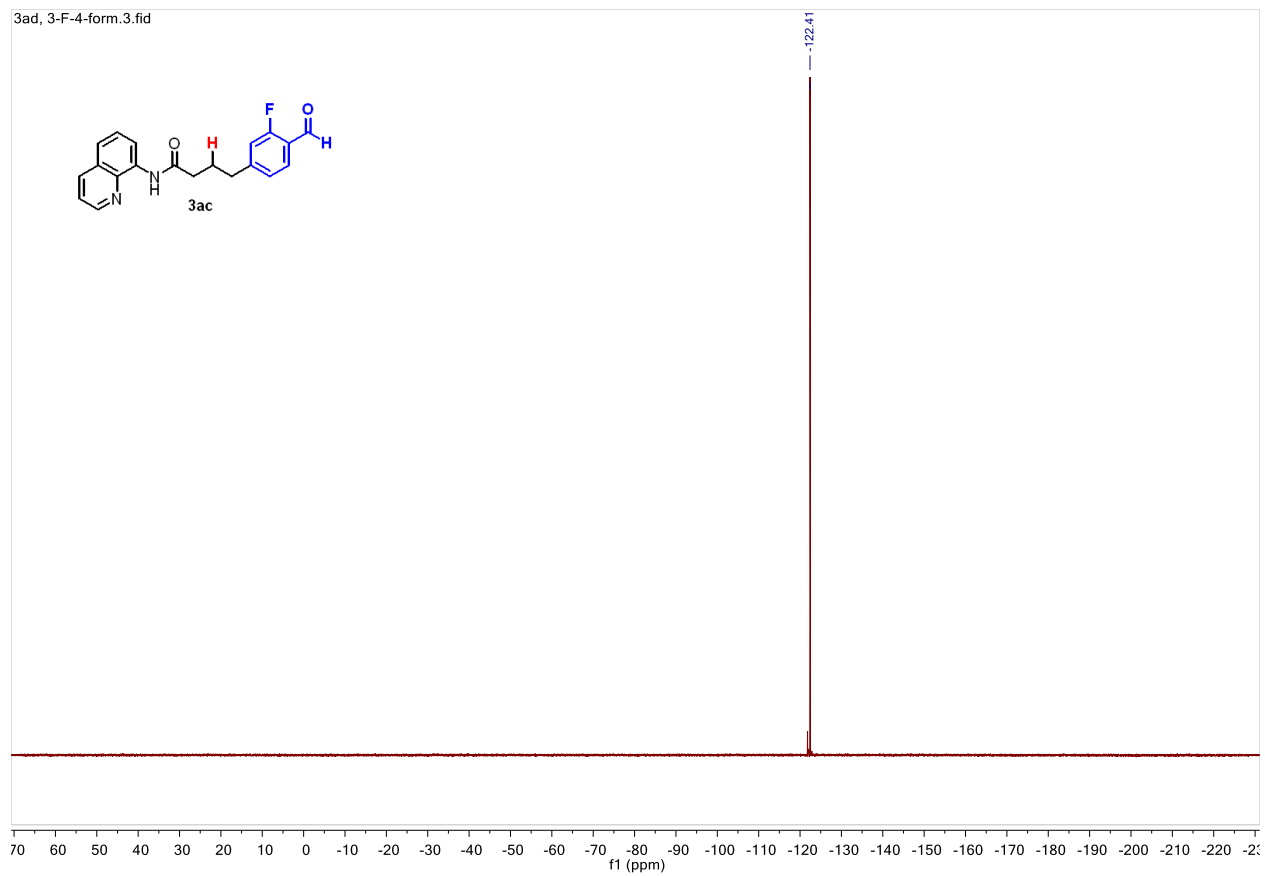

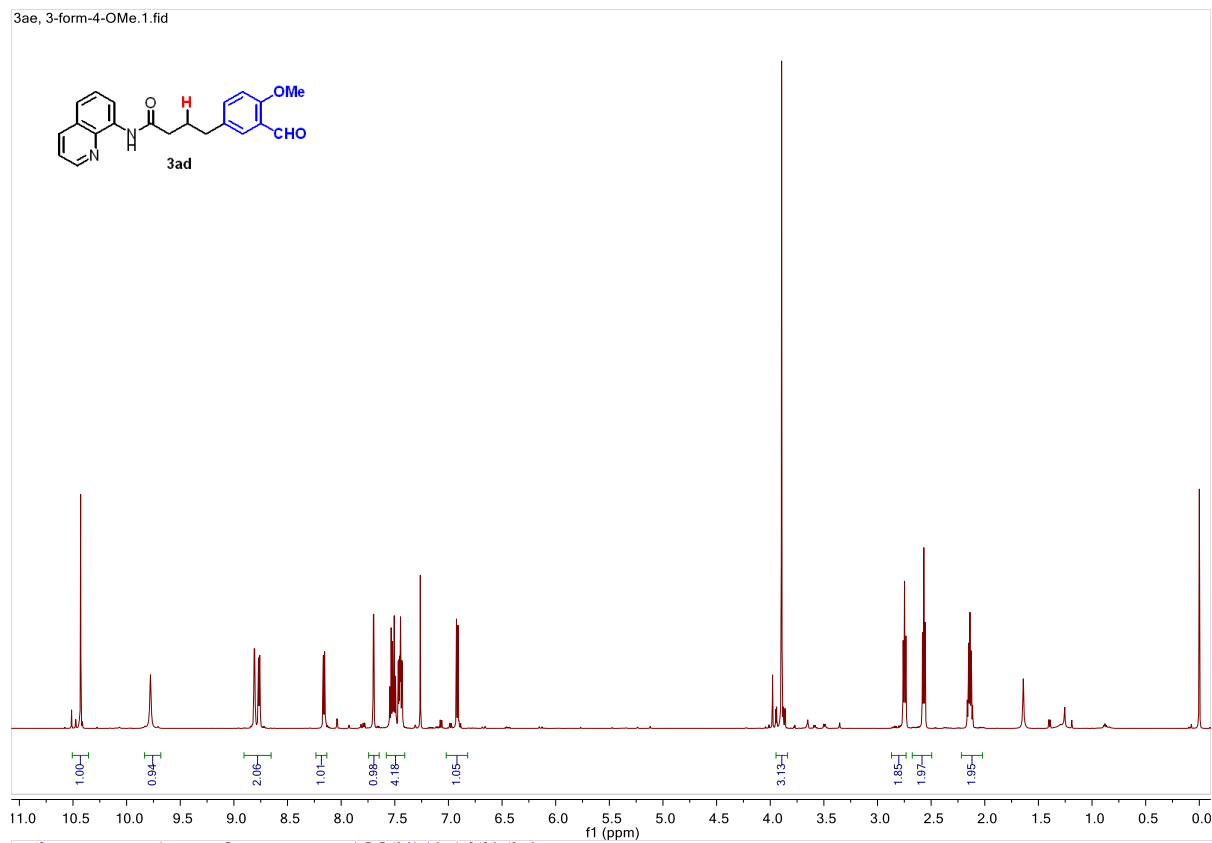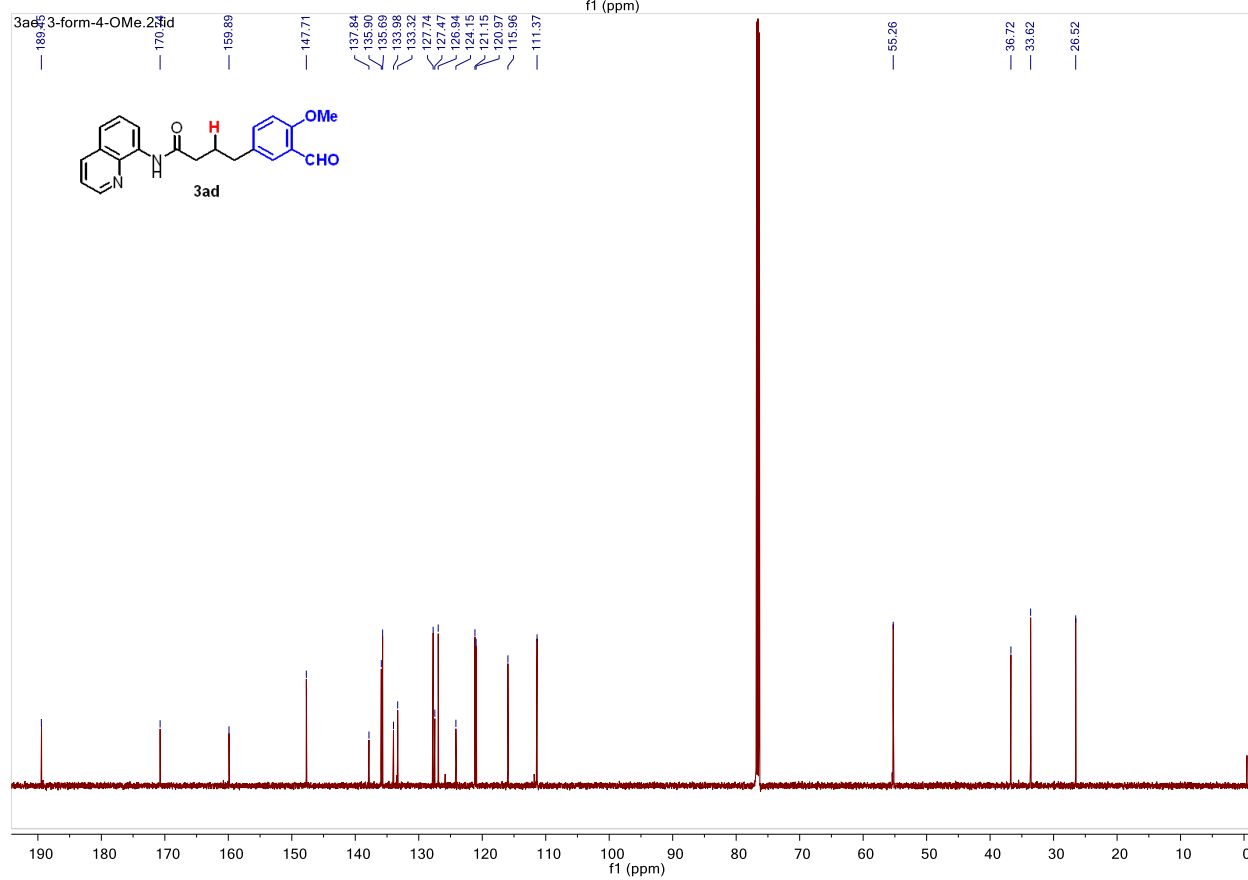

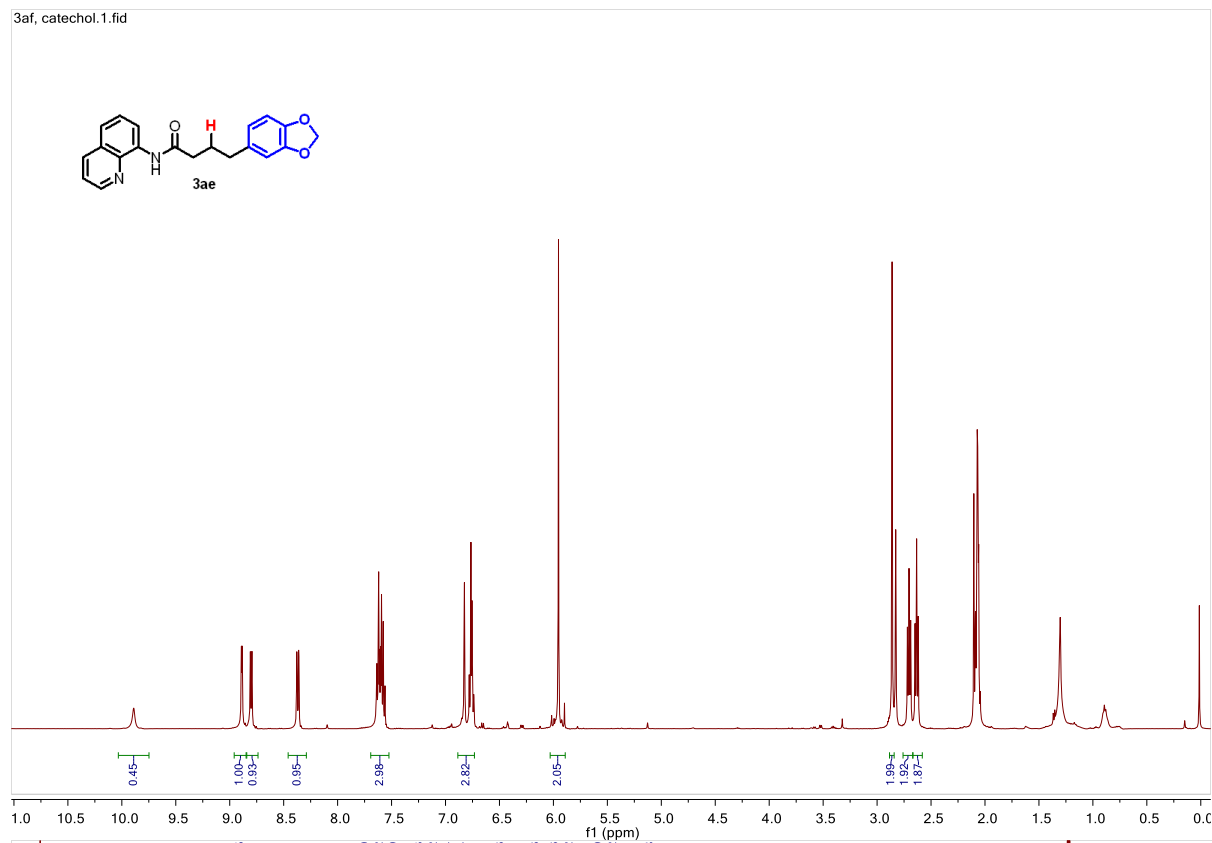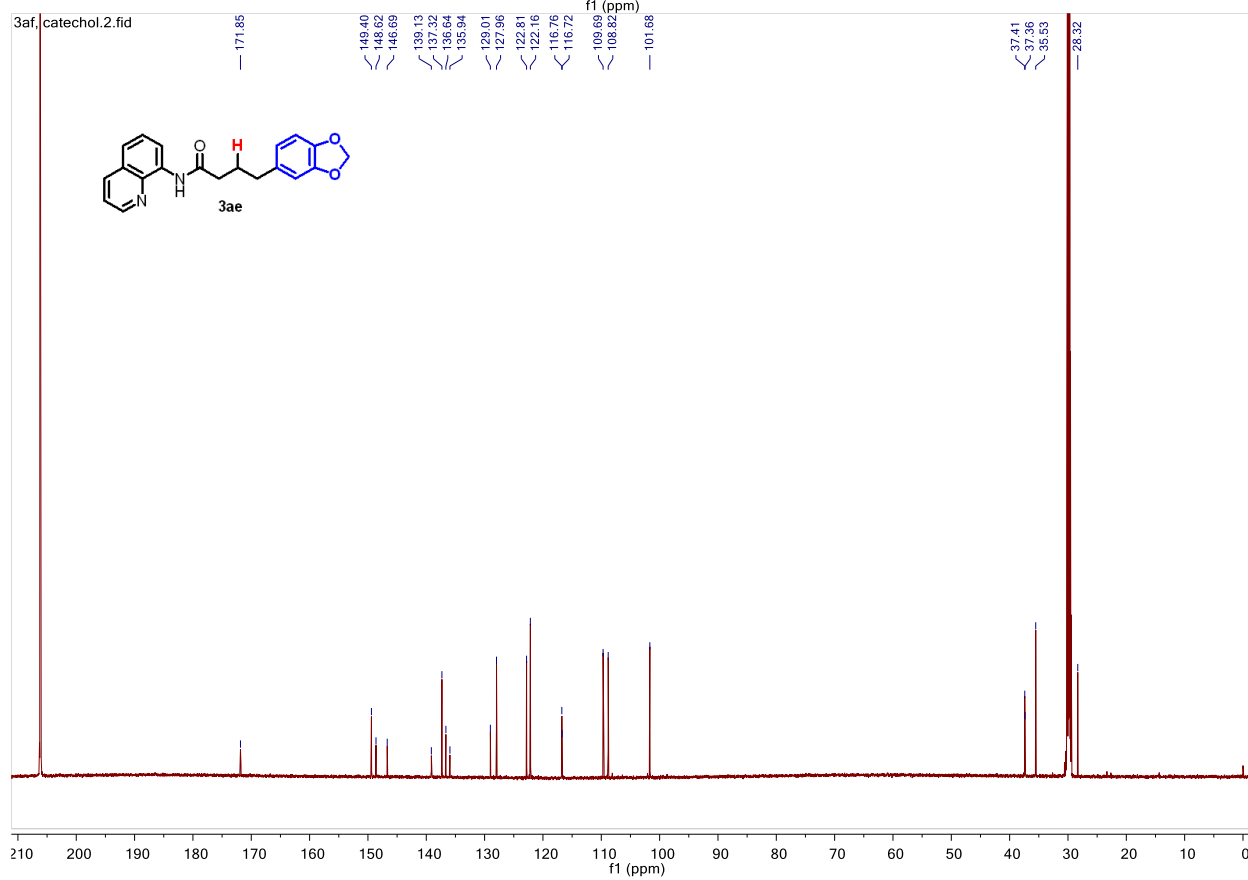

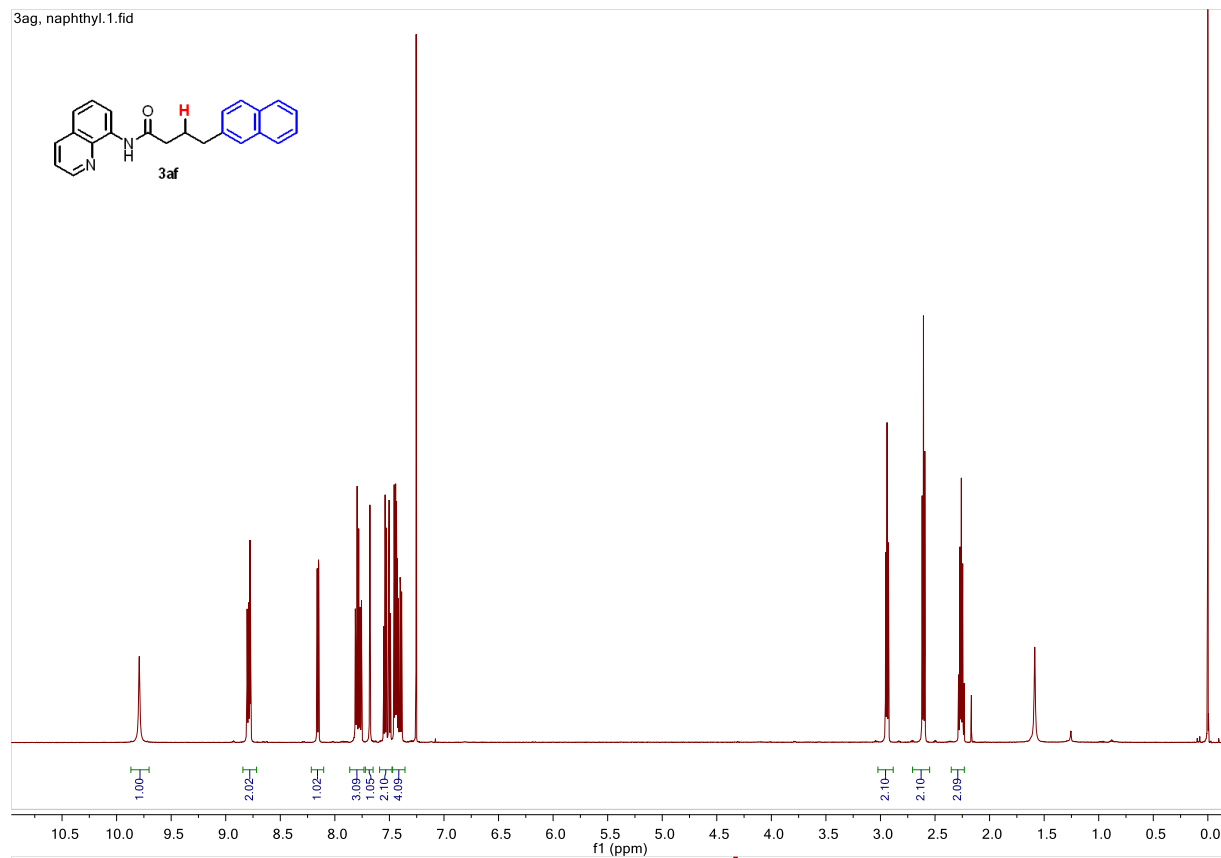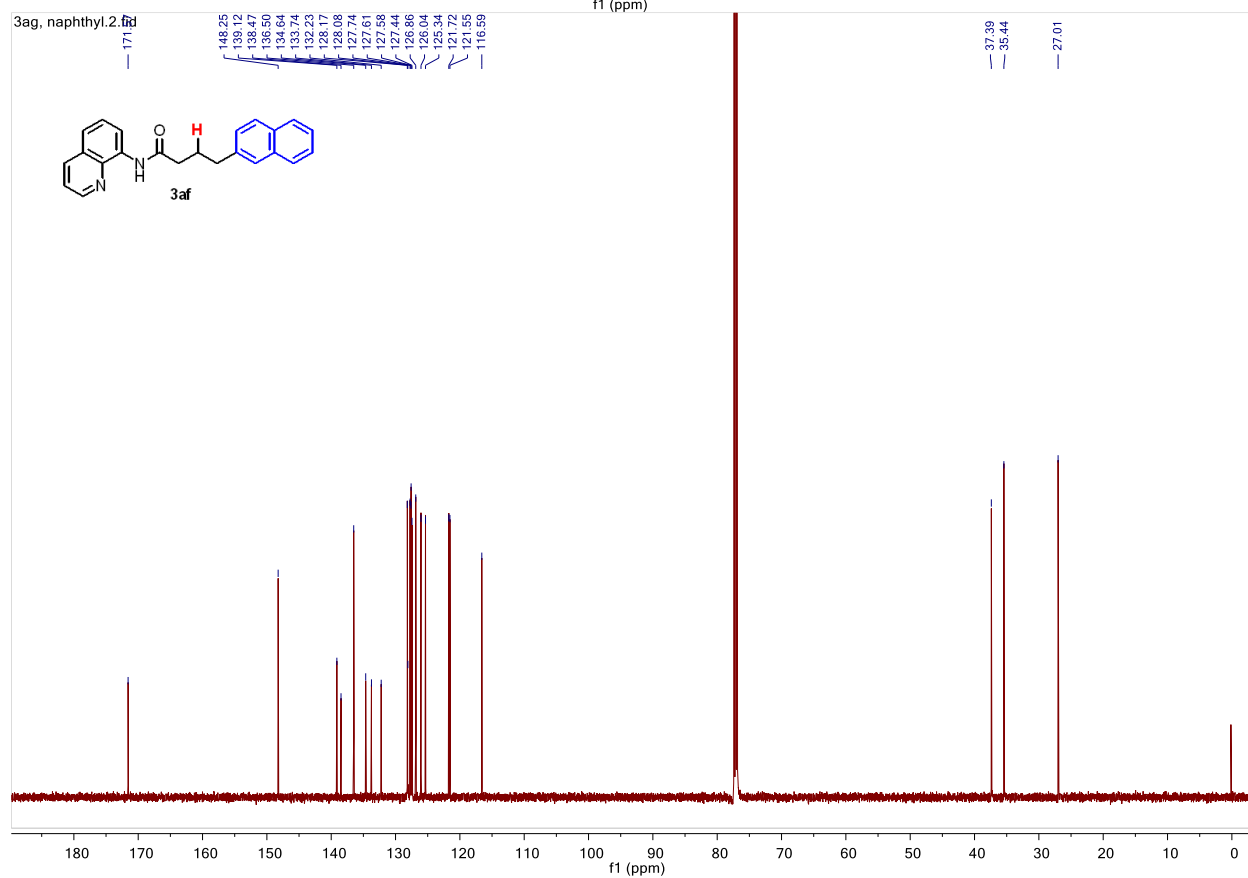

3ah, furan.1.fid

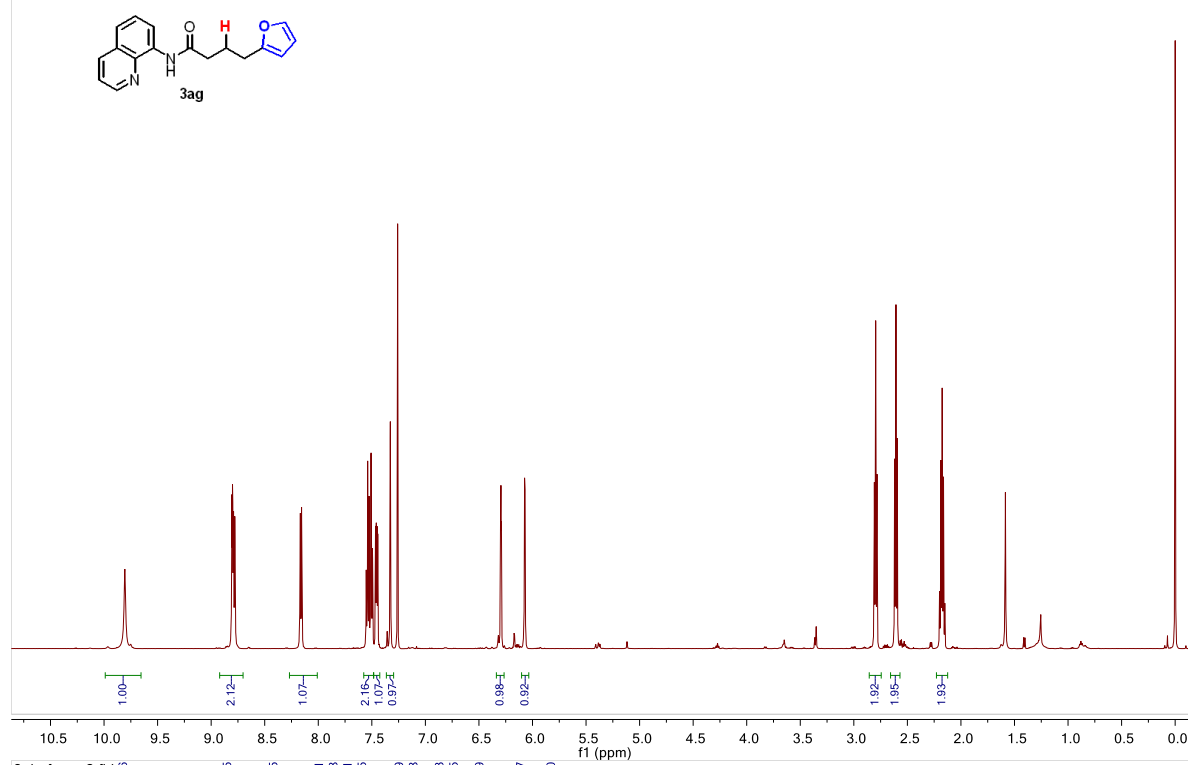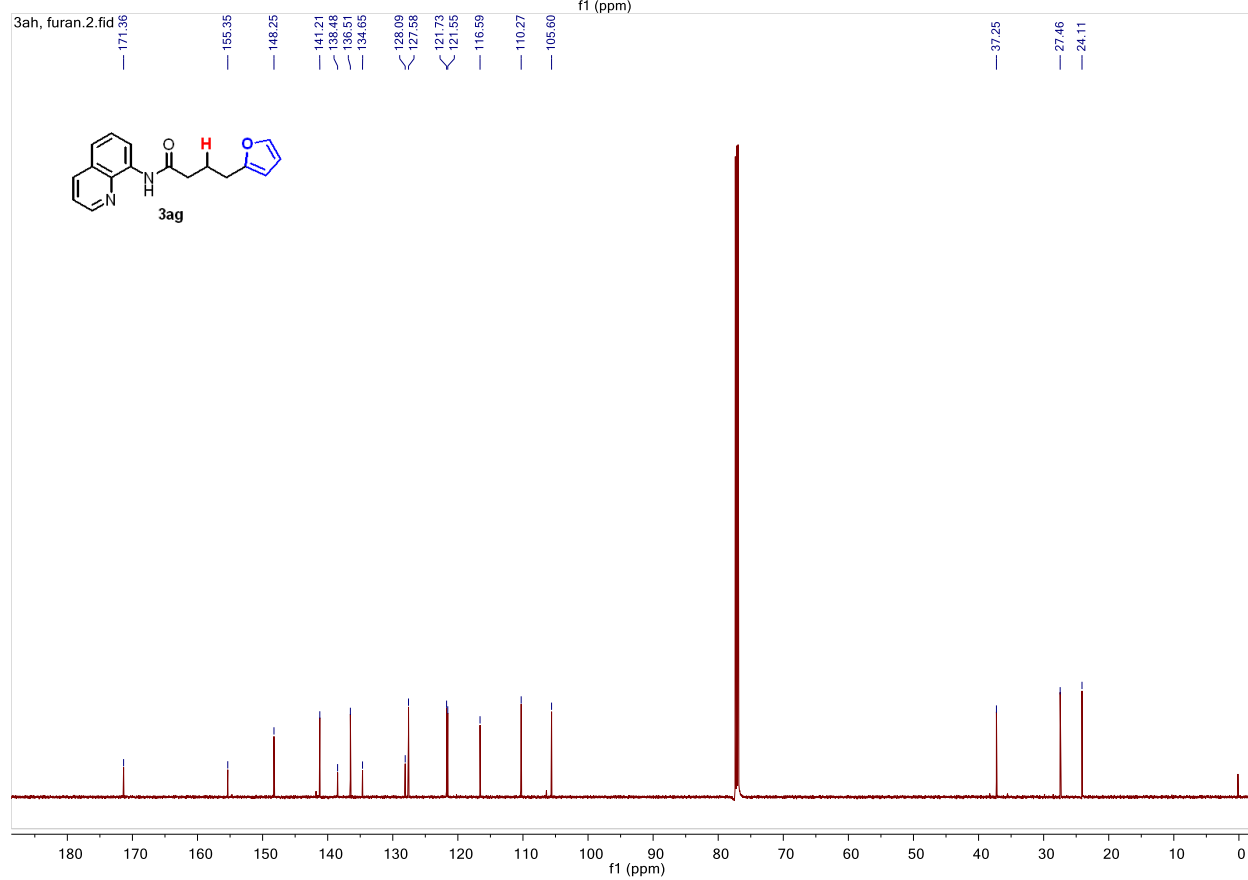



00712344-0051-3.301.fid  
NMR System Tang

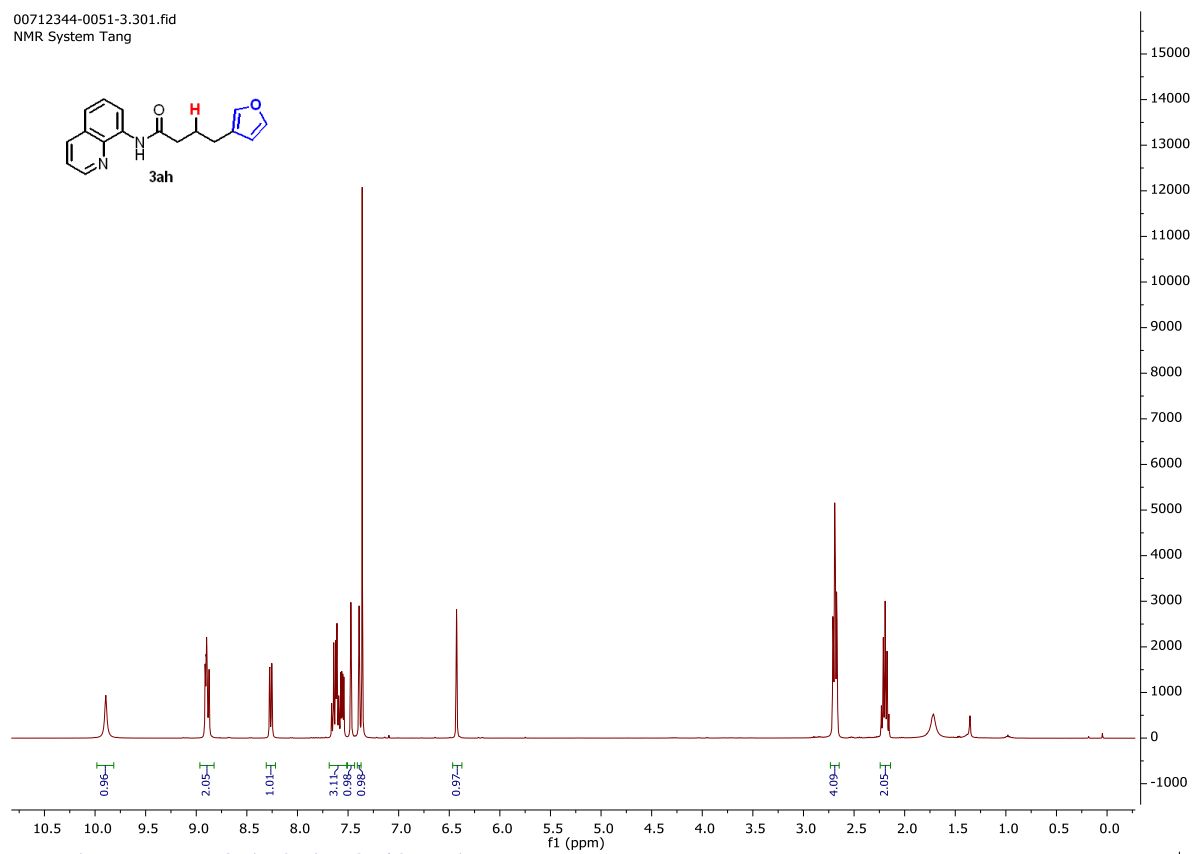

00712344-0051-3.302.fid  
NMR System Tang

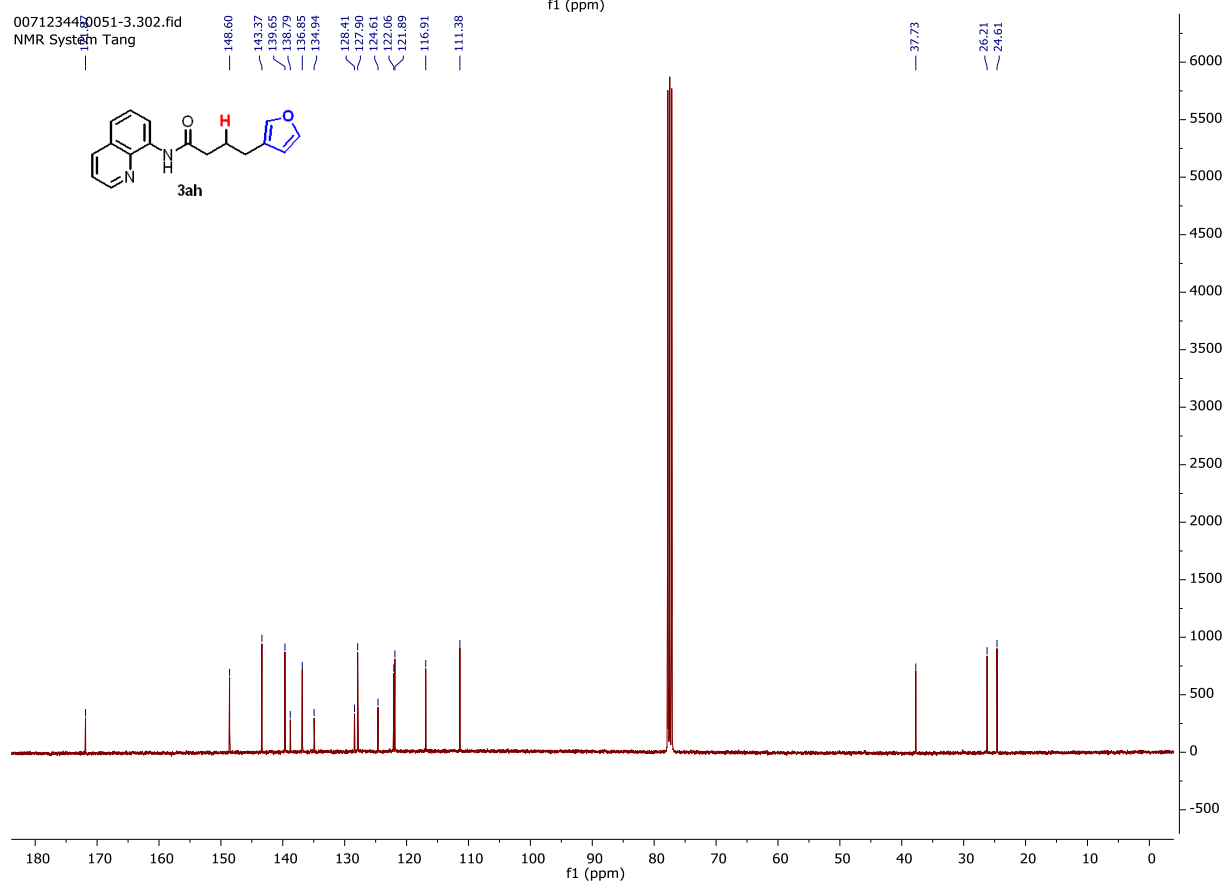

712344-0032-001.301.fid  
NMR System Tang

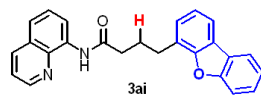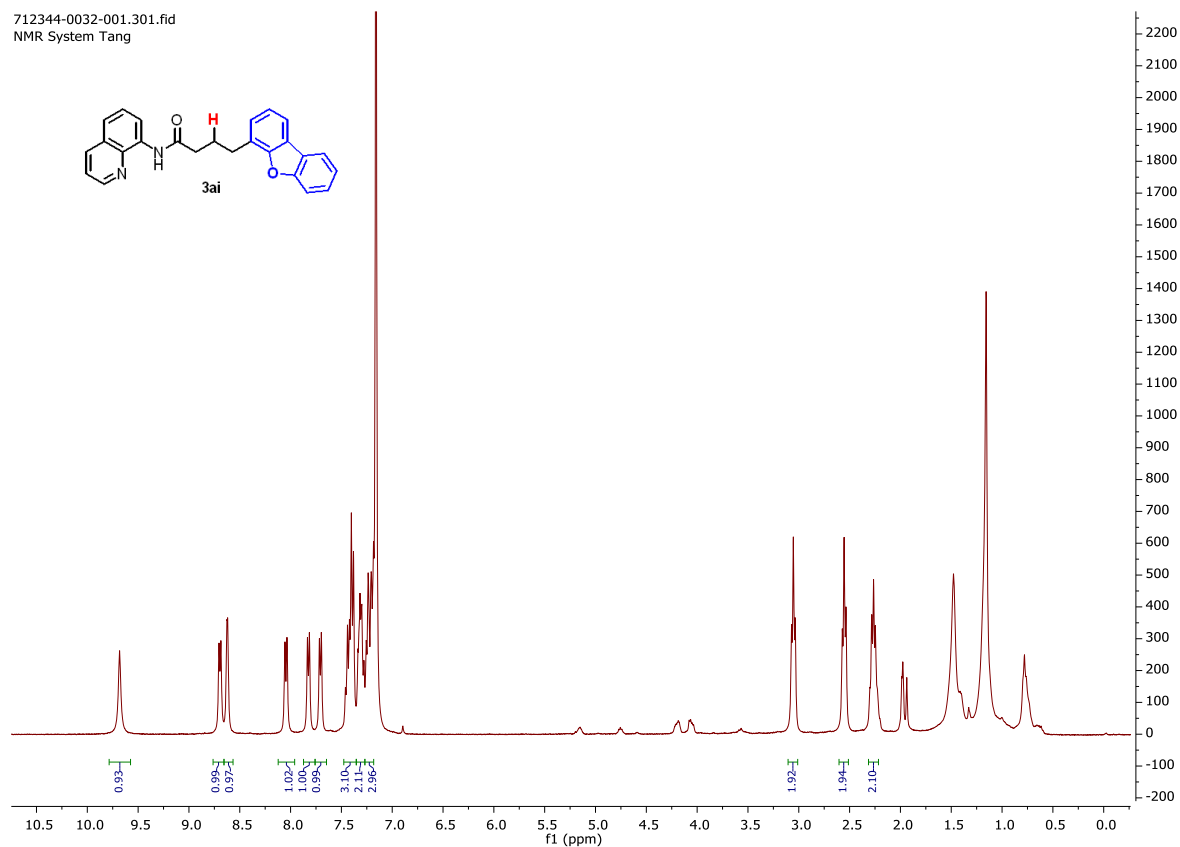

712344-0032-001.302.fid  
NMR System Tang

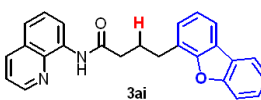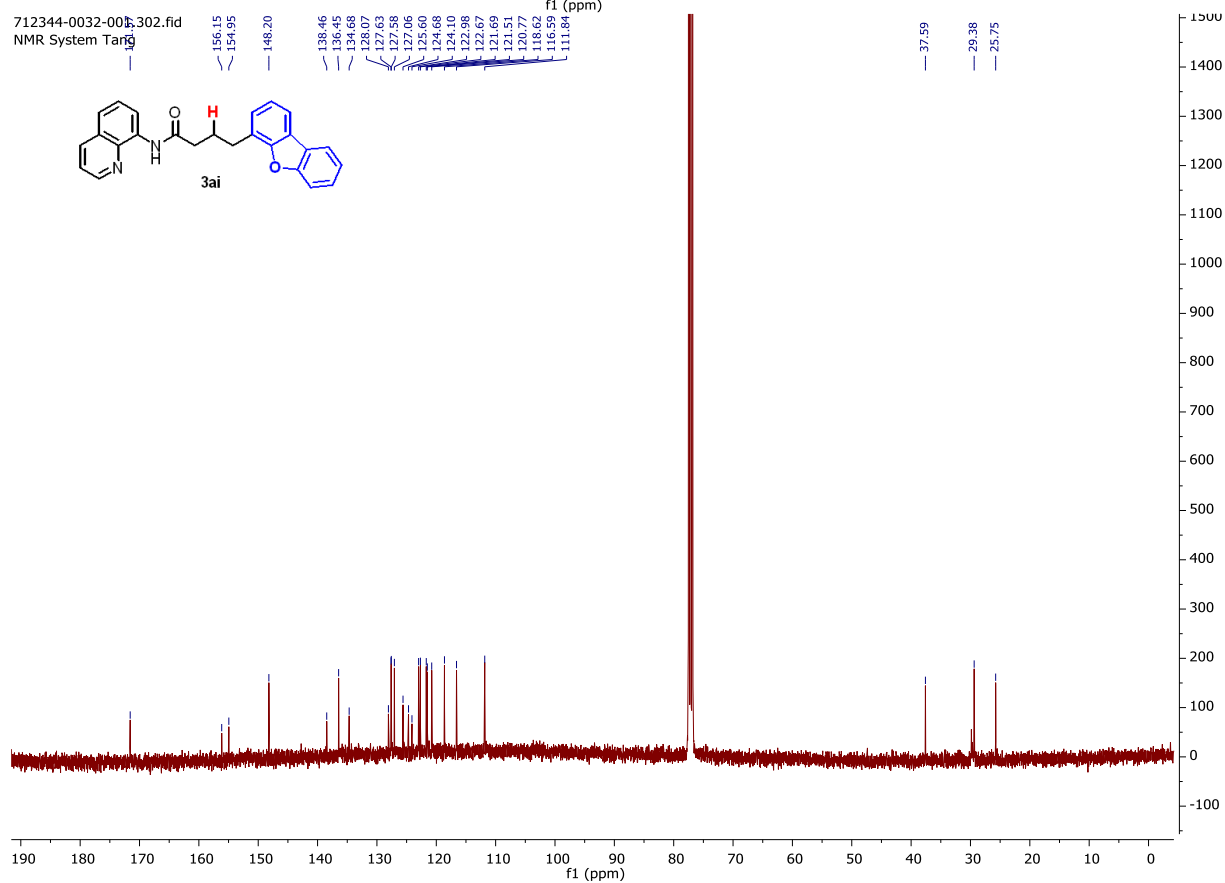

3aj, boc pyrrole.1.fid

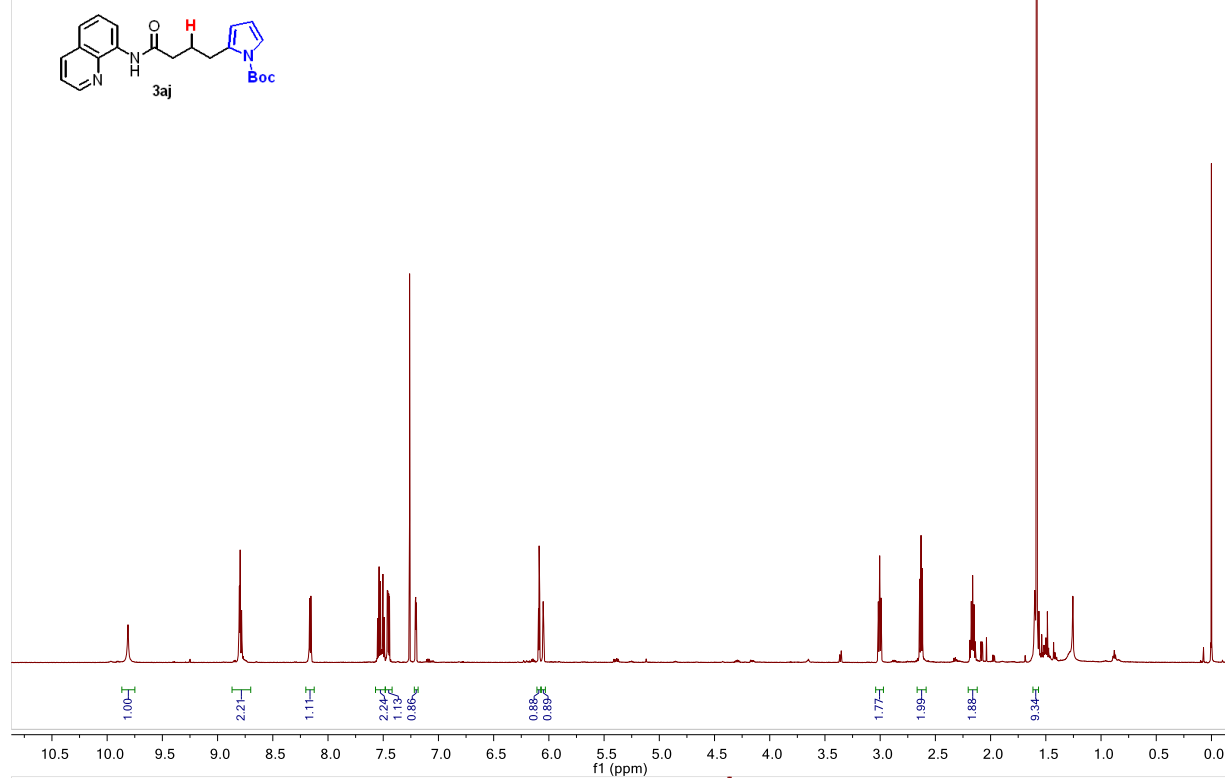

3aj, boc pyrrole.2.fid

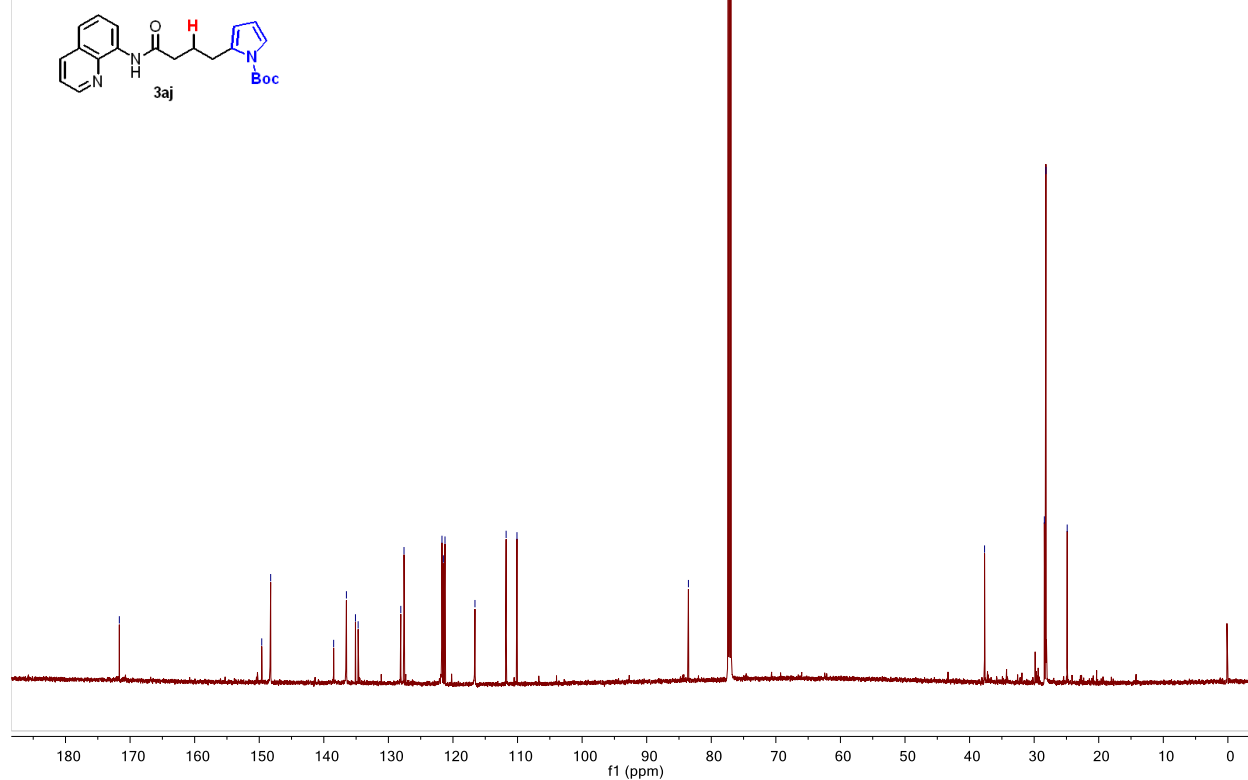

110707-4245-001.303.fid  
NMR System Tang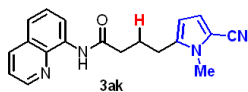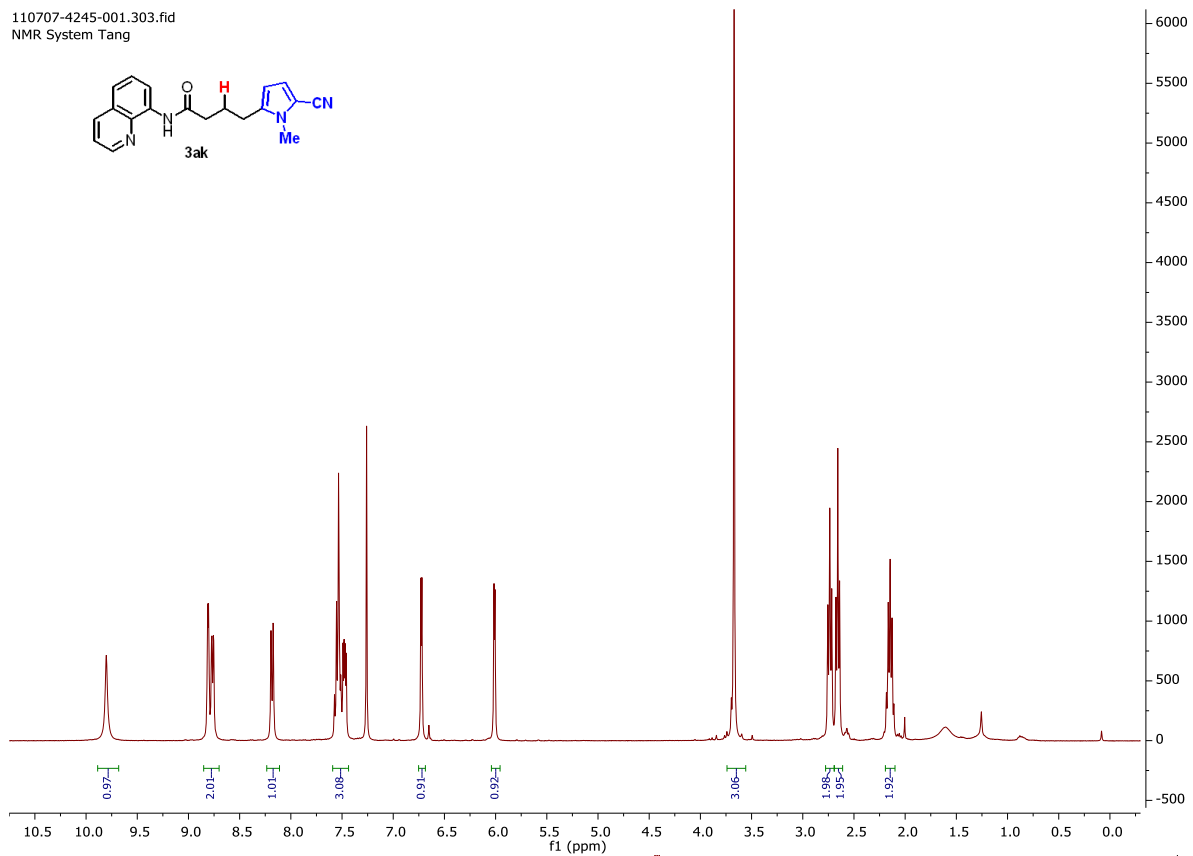110707-4245-001.304.fid  
NMR System Tang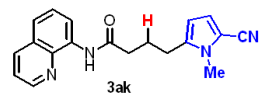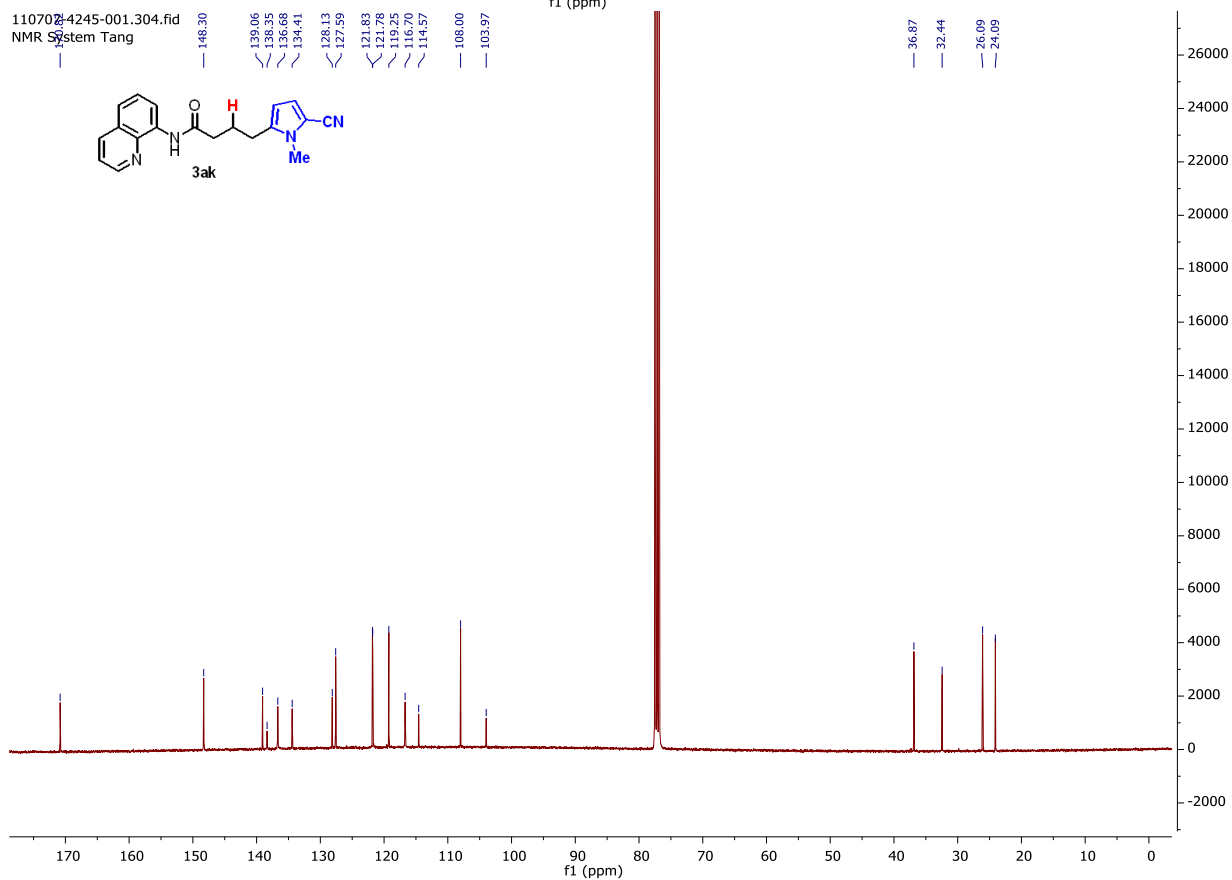

110707-4243-001.301.fid  
NMR System Tang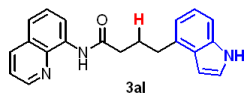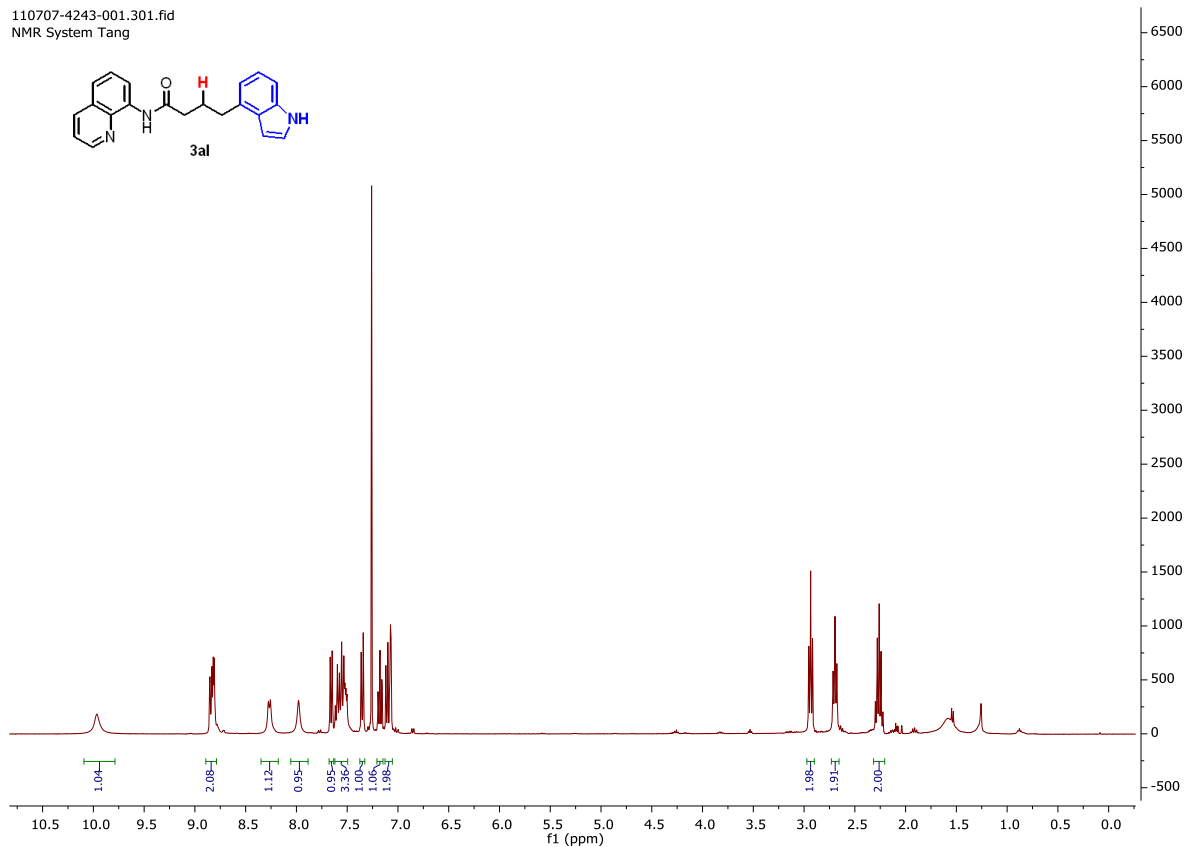110707-4243-001.303.fid  
NMR System Tang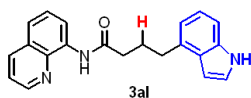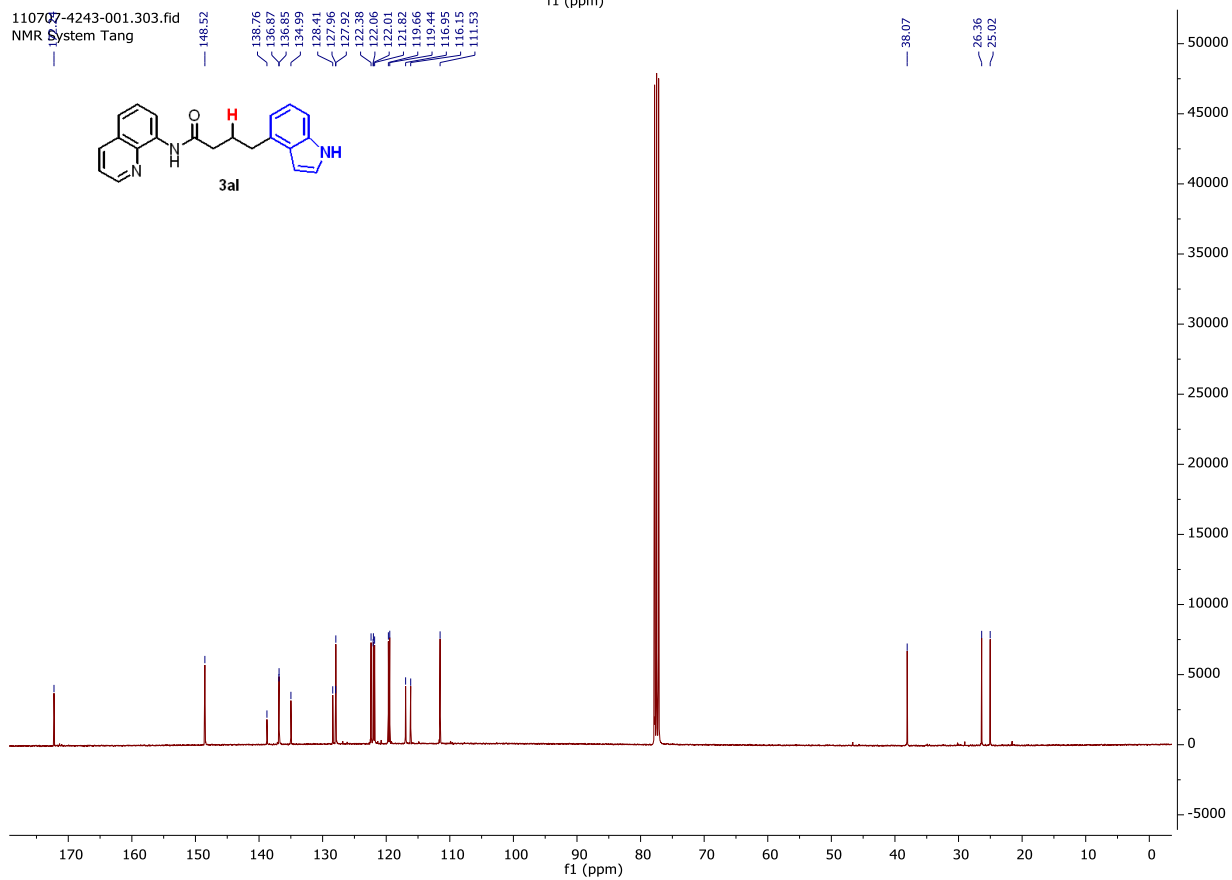

00712344-0032-1.301.fid  
NMR System Tang

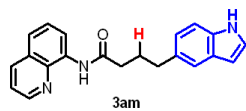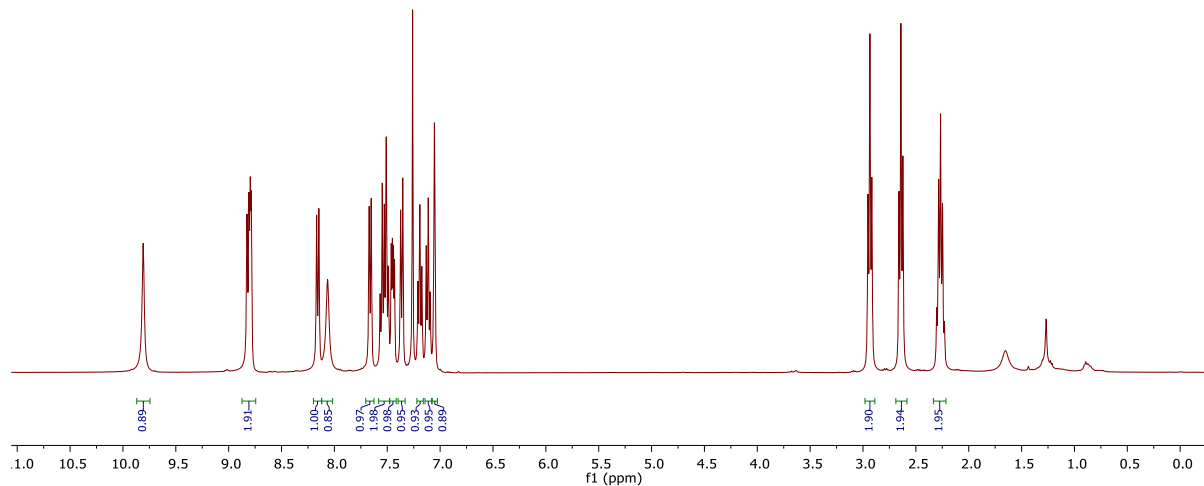

00712344-0032-1.302.fid  
NMR System Tang

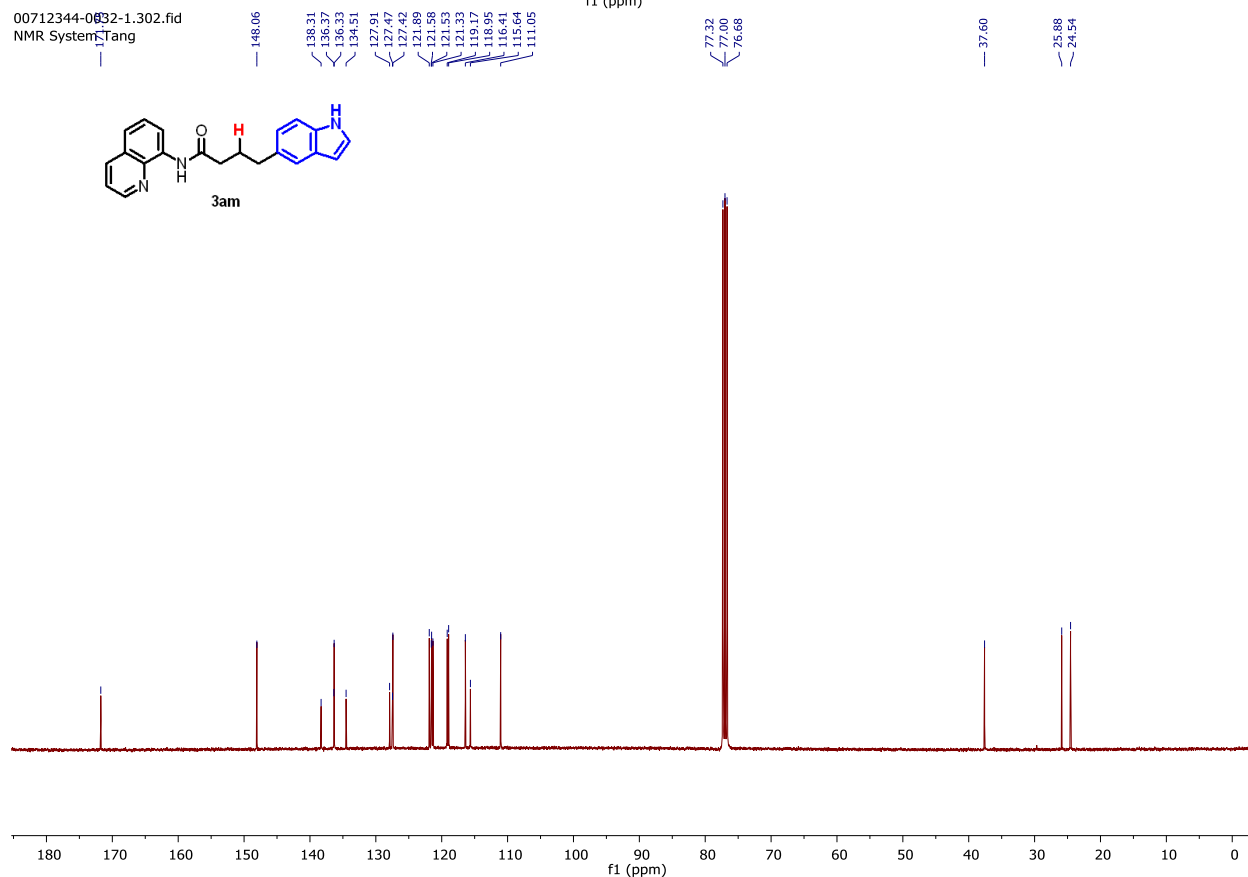

110717-3333-002.401.fid  
NMR System Puh  
110717-3333-002

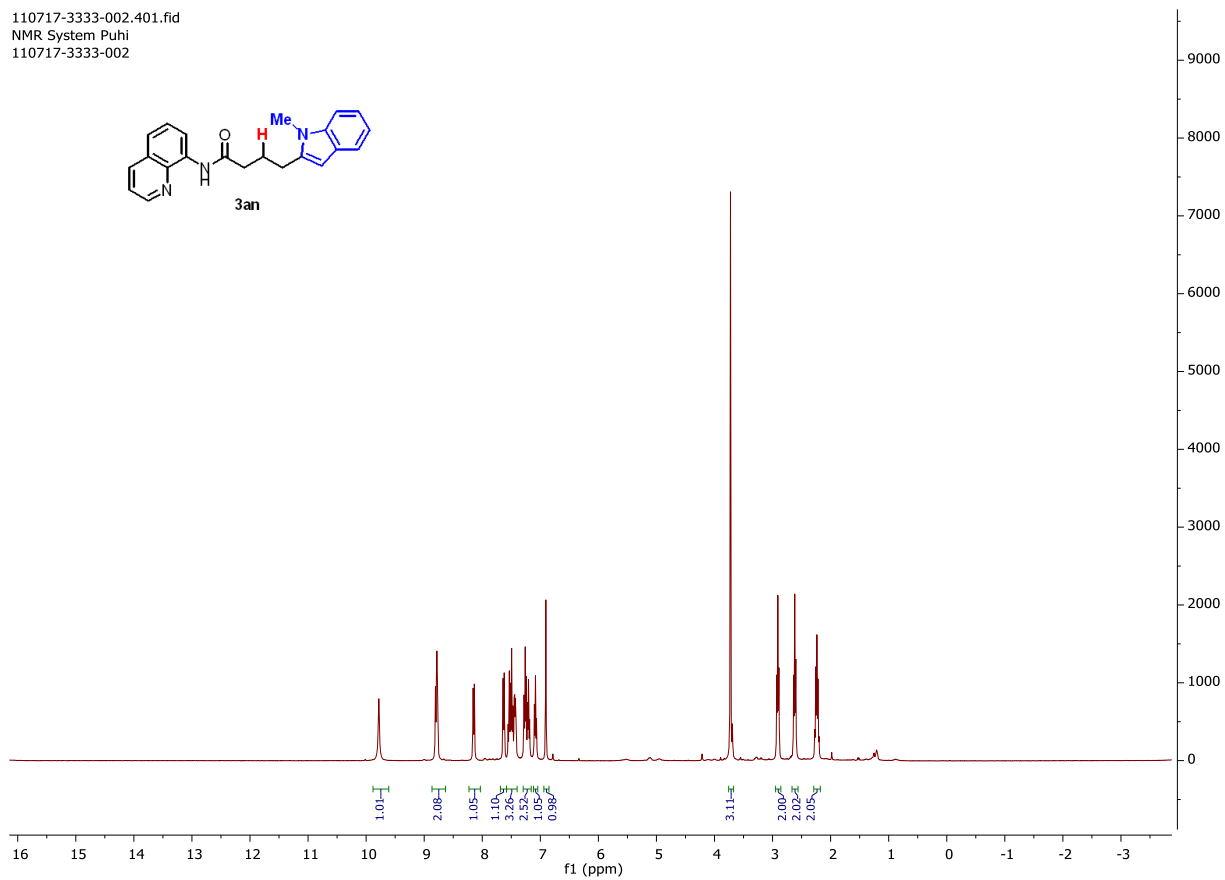

110717-3333-002.402.fid  
NMR System Puh  
110717-3333-002

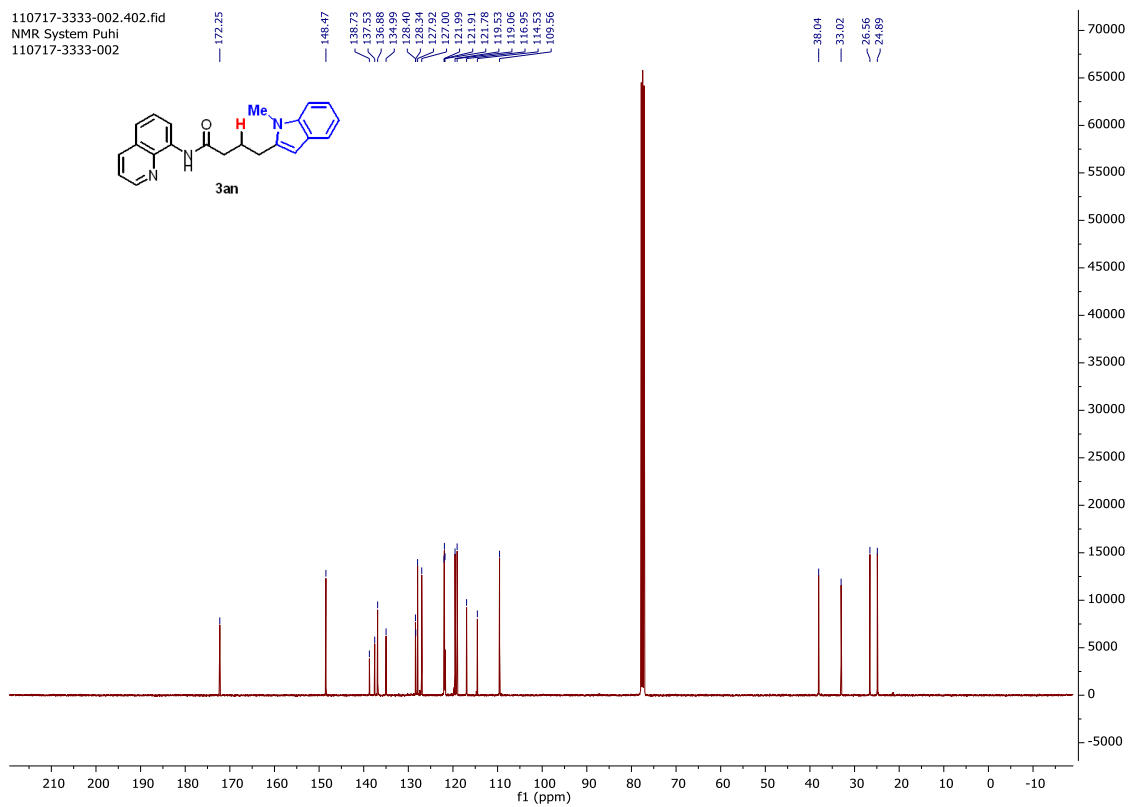

00709238-1196-002.401.fid  
NMR System Puhi

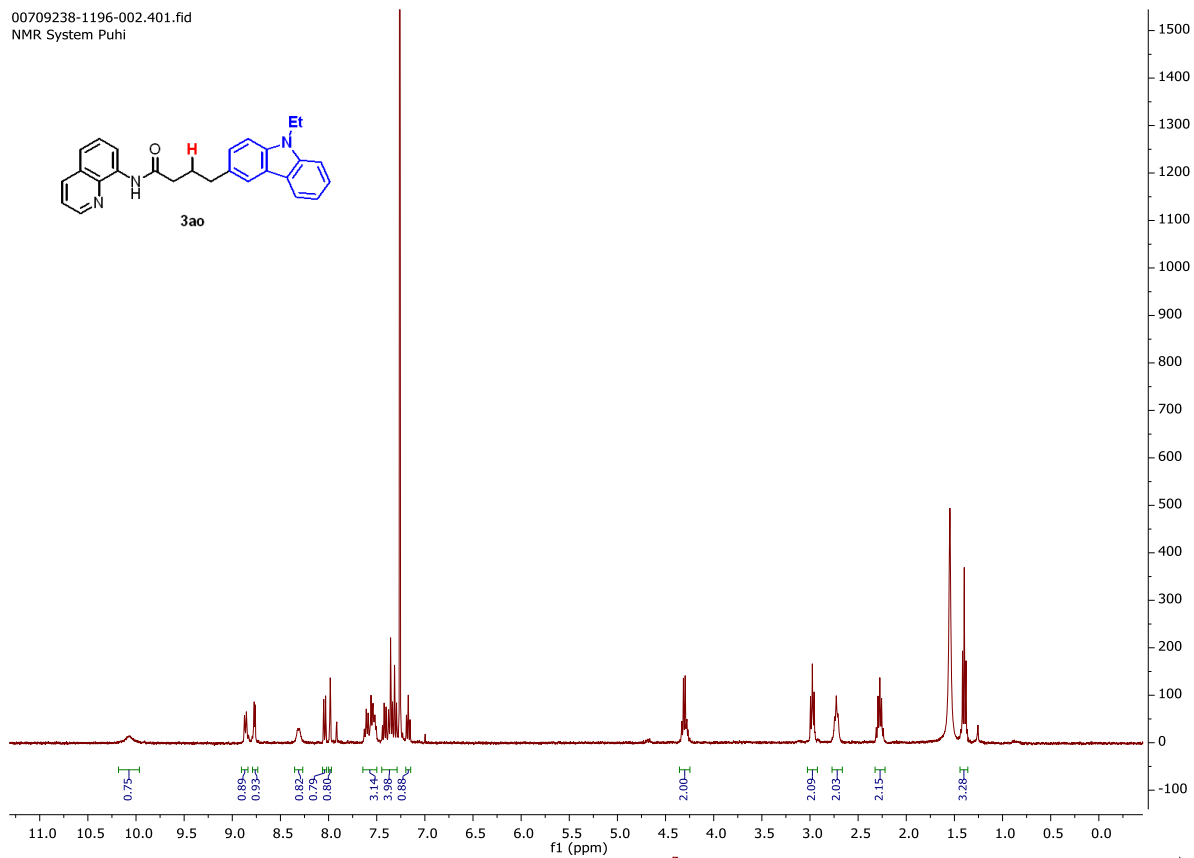

00709238-1196-002-Carbon.1.fid  
NMR System Puhi

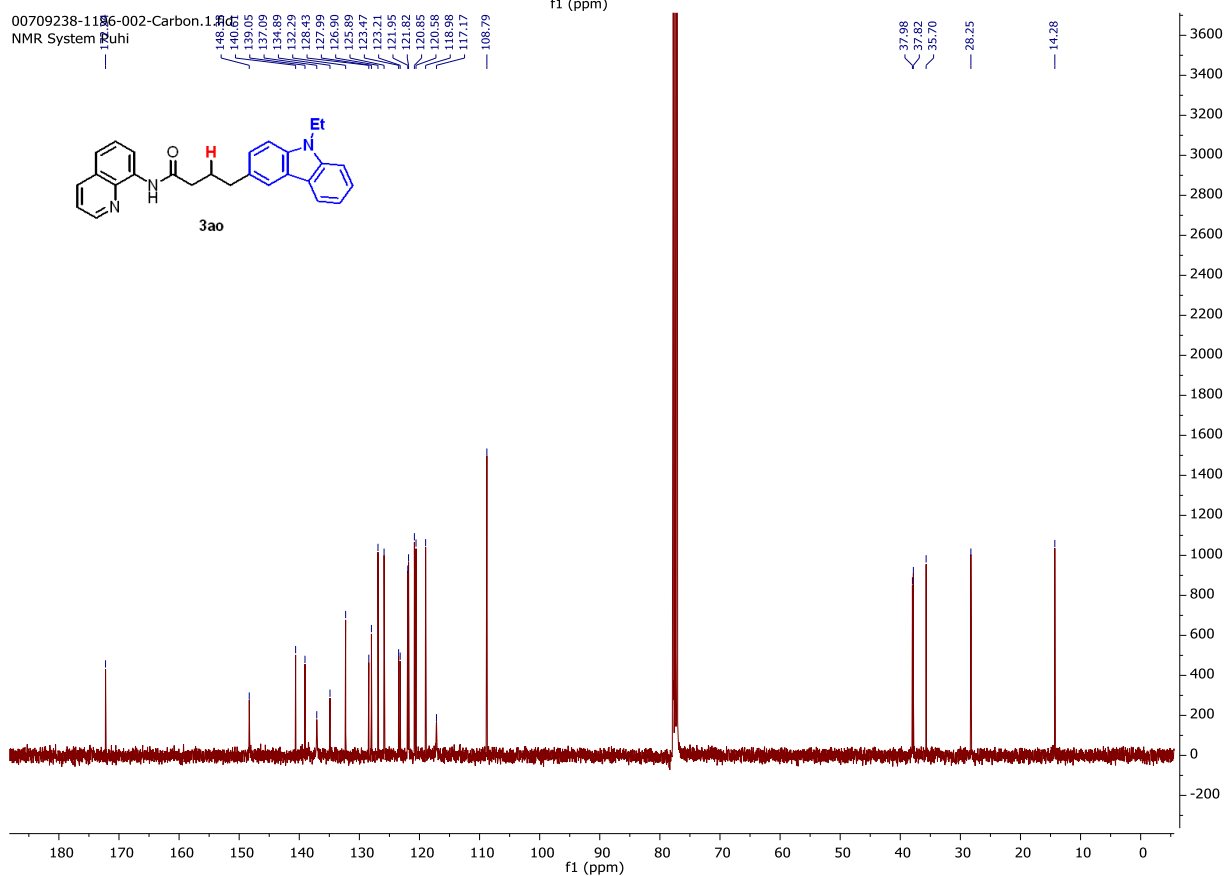



3ap.1.fid

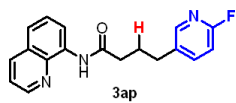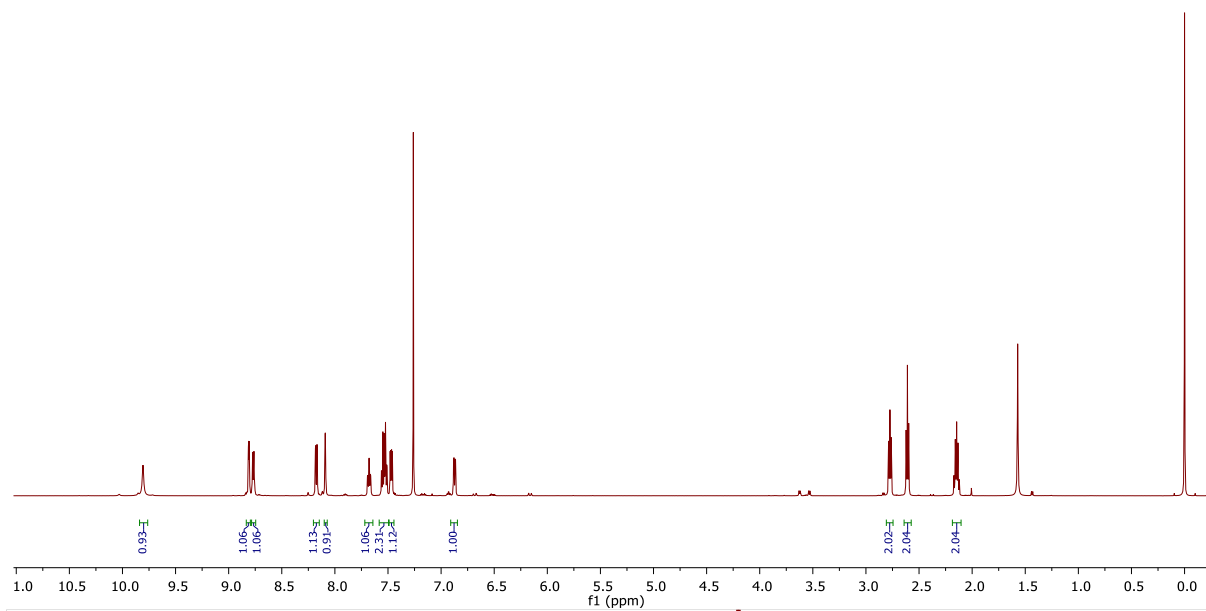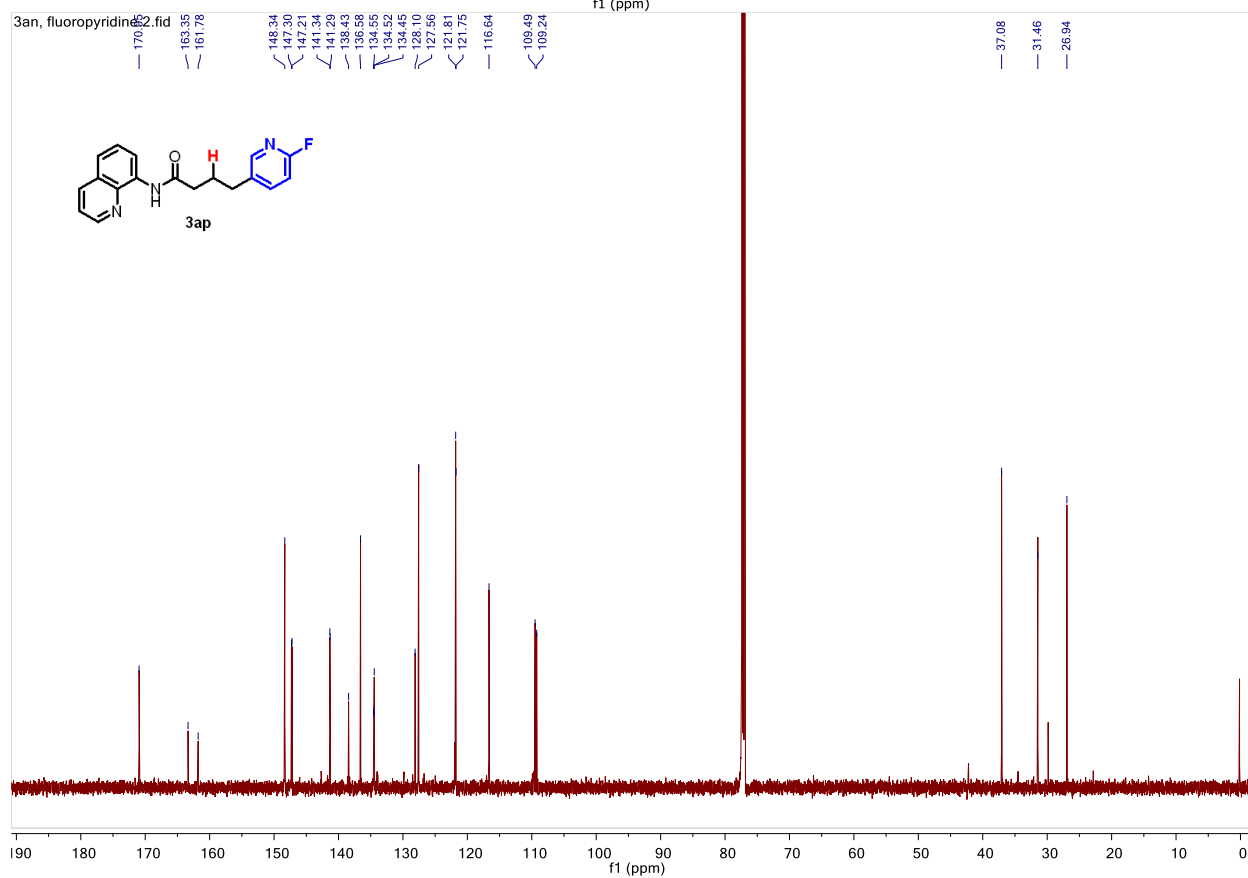

3an, fluoropyridine.3.fid

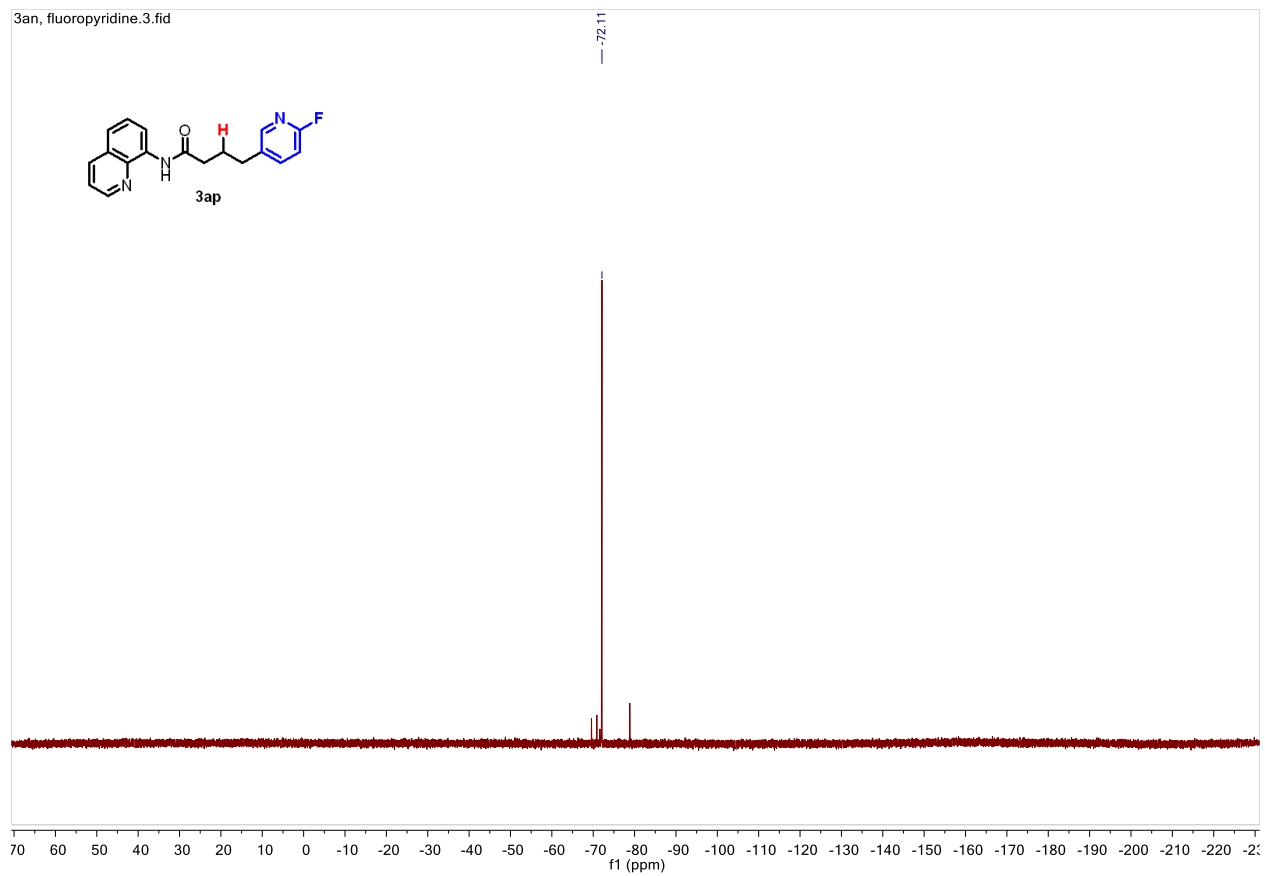

110707-4244-001.301.fid  
NMR System Tang

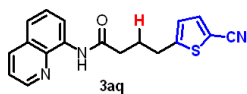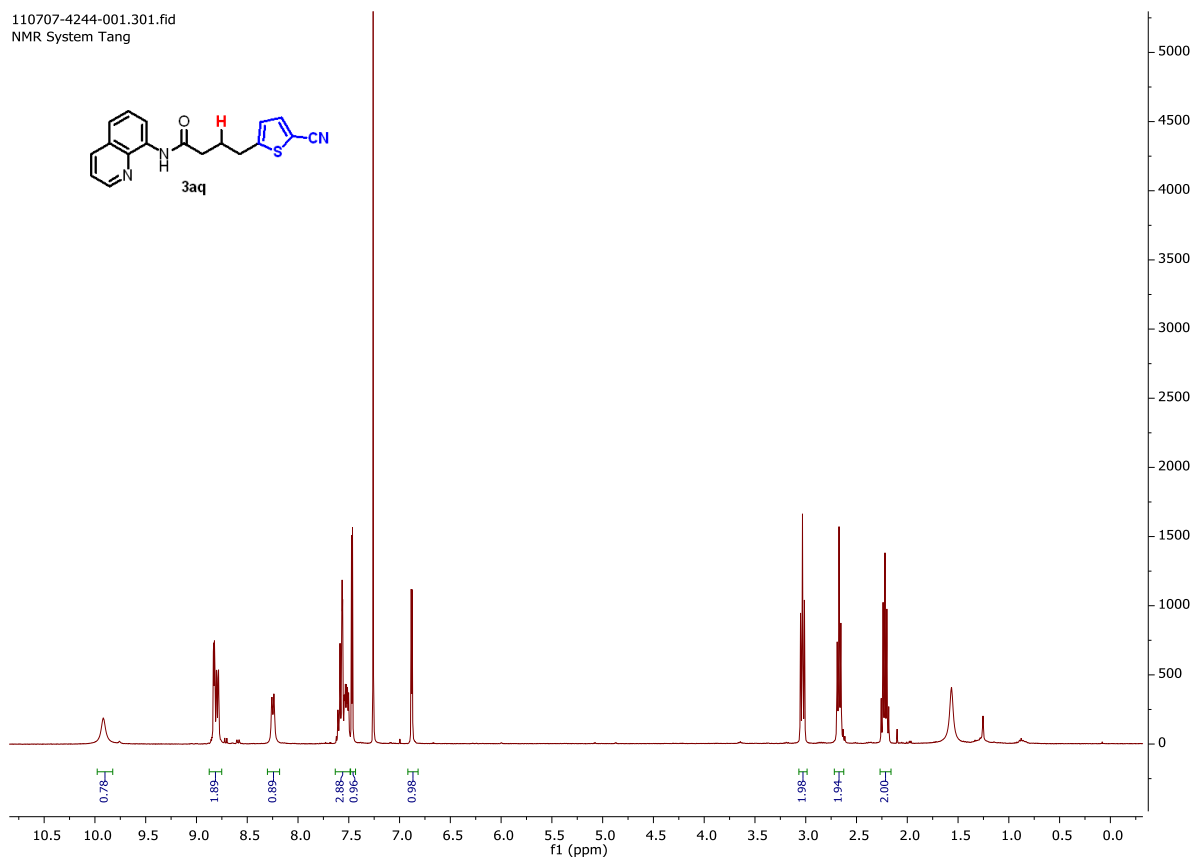

110707-4244-001.303.fid  
NMR System Tang

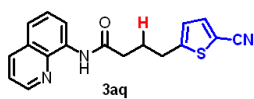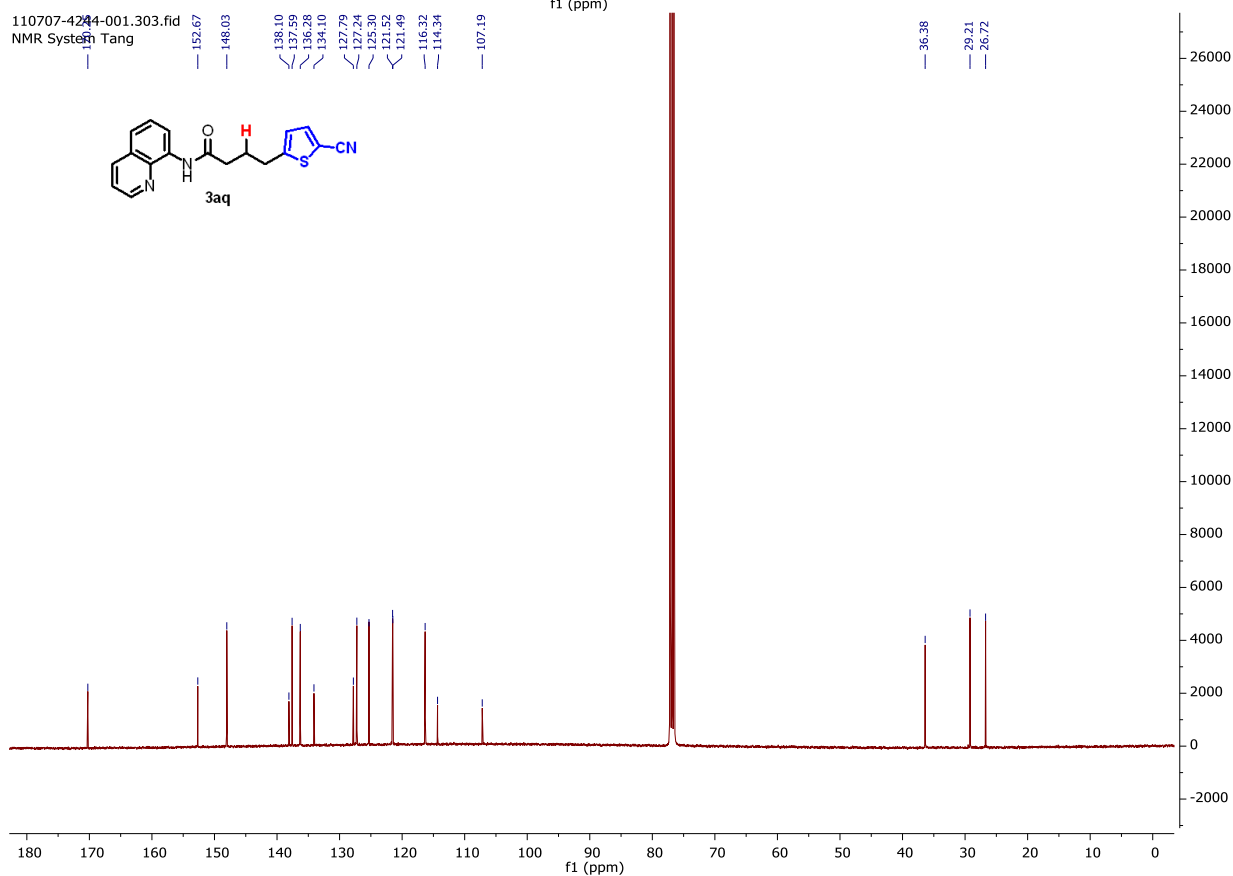

00712344-0051-1.301.fid  
NMR System Tang

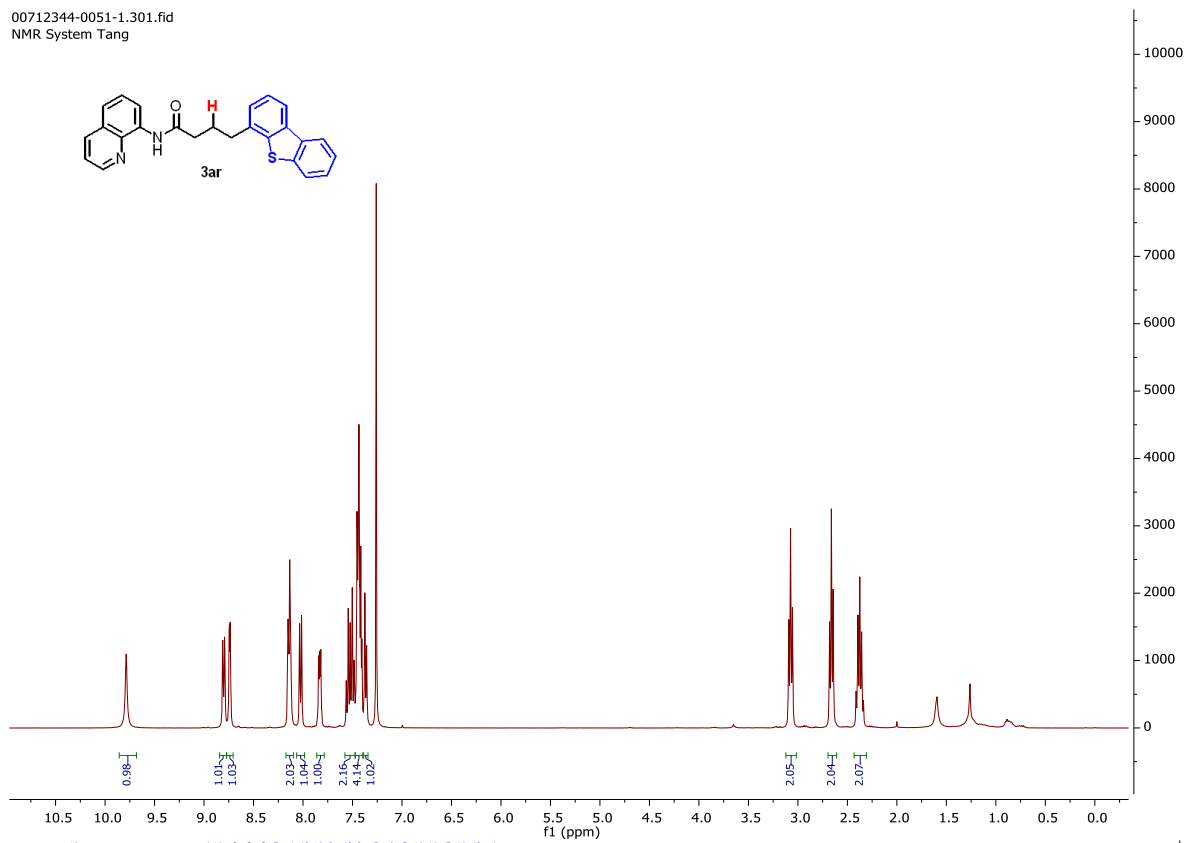

00712344-0051-1.302.fid  
NMR System Tang

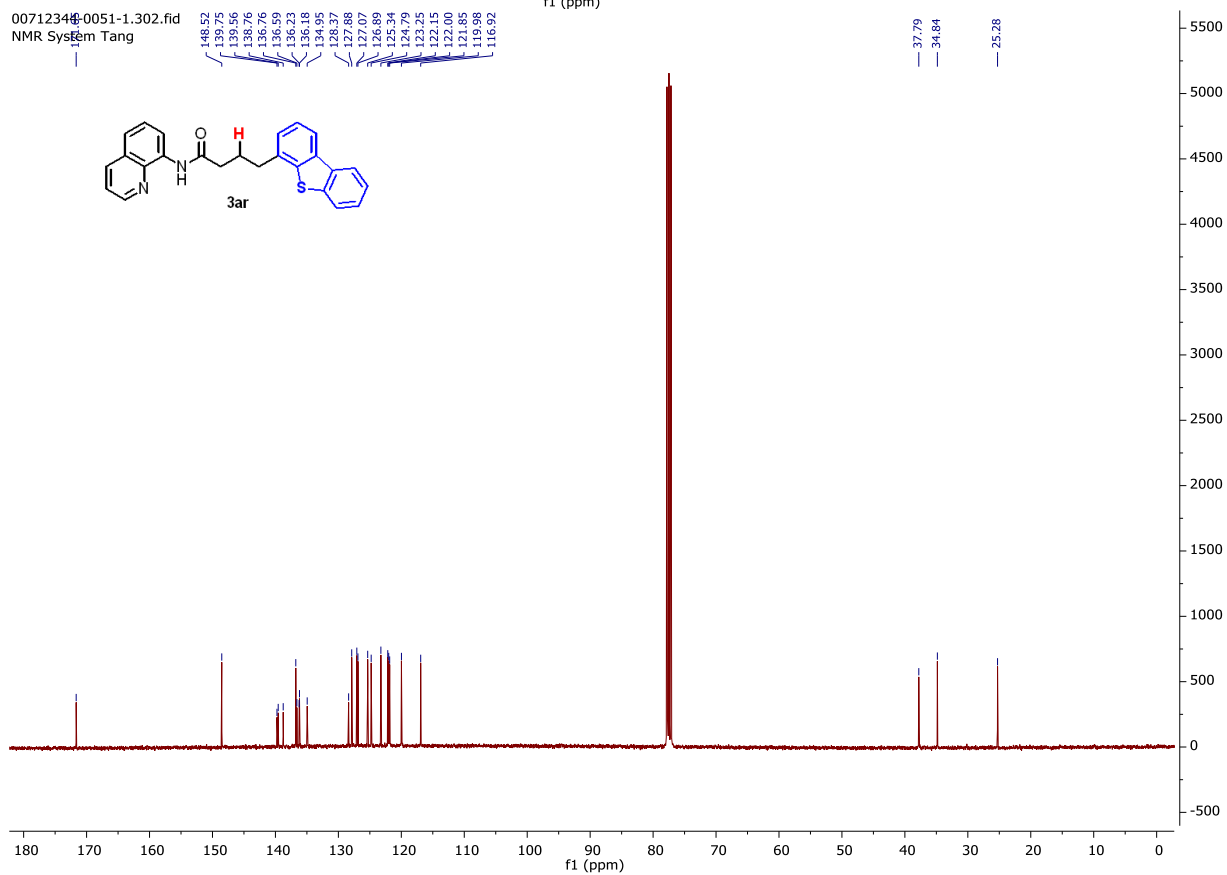

00712344-0051-2.301.fid  
NMR System Tang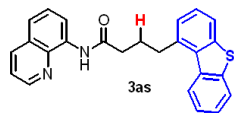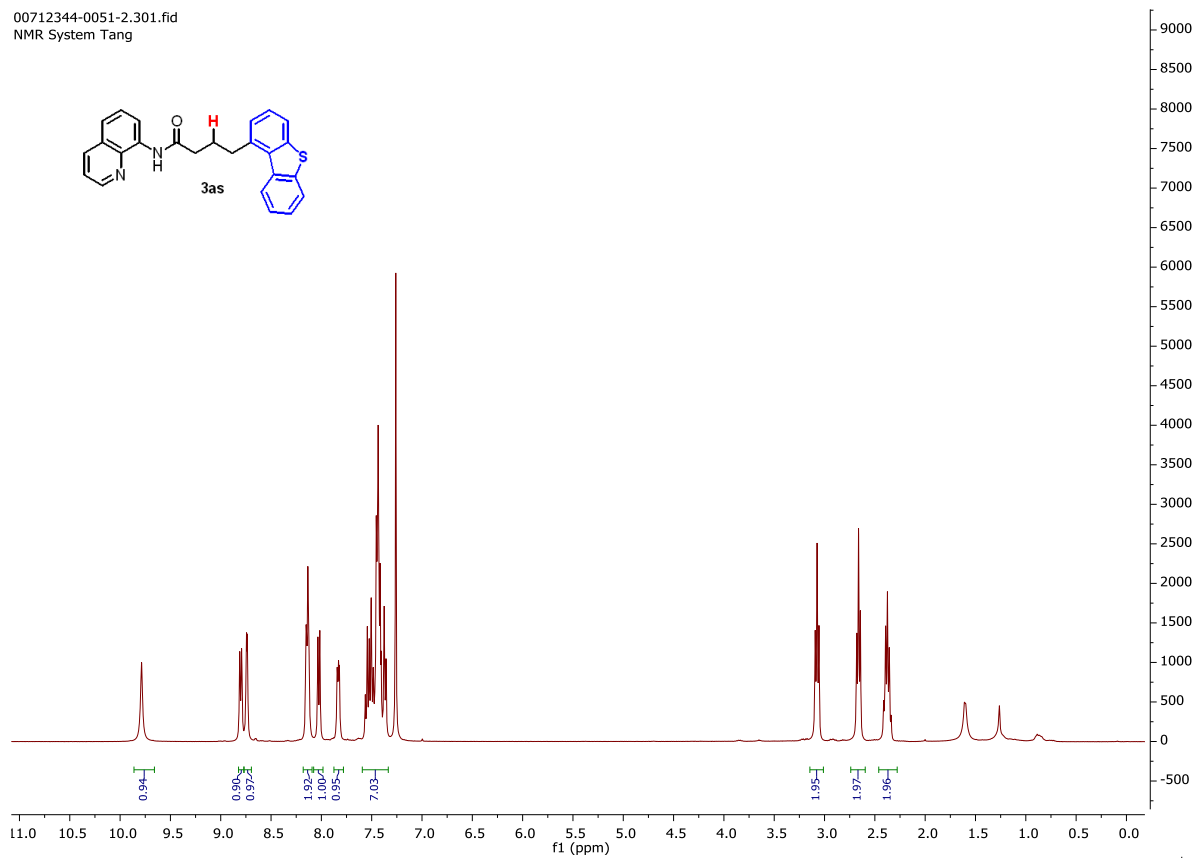00712344-0051-2.302.fid  
NMR System Tang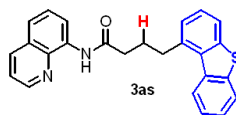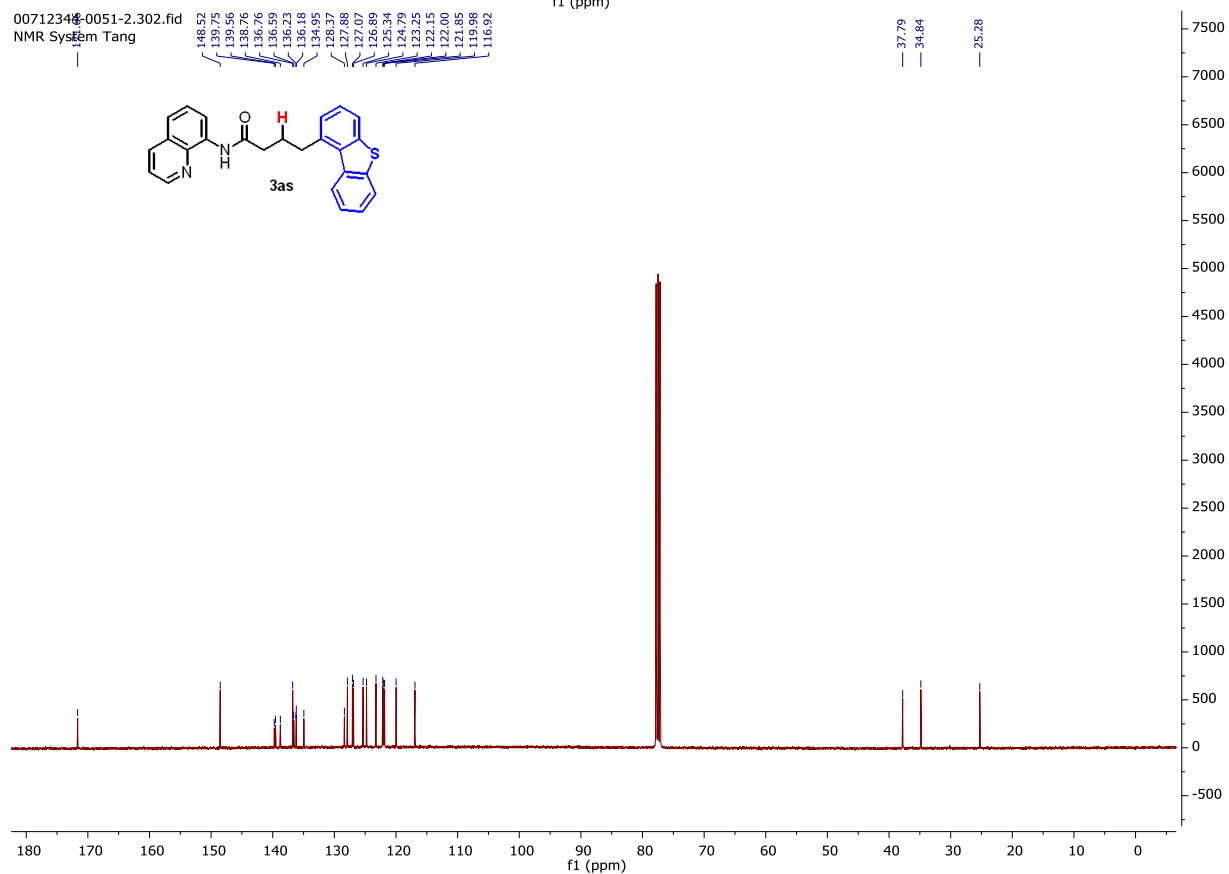

RM-243a-20.1.fid

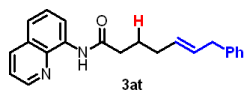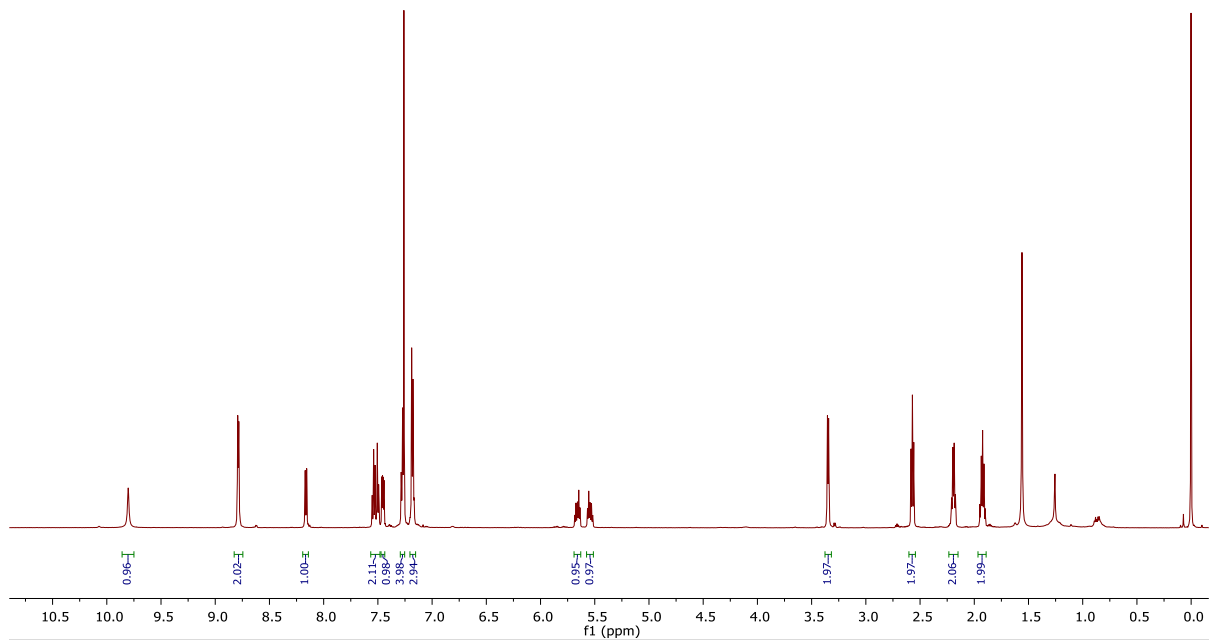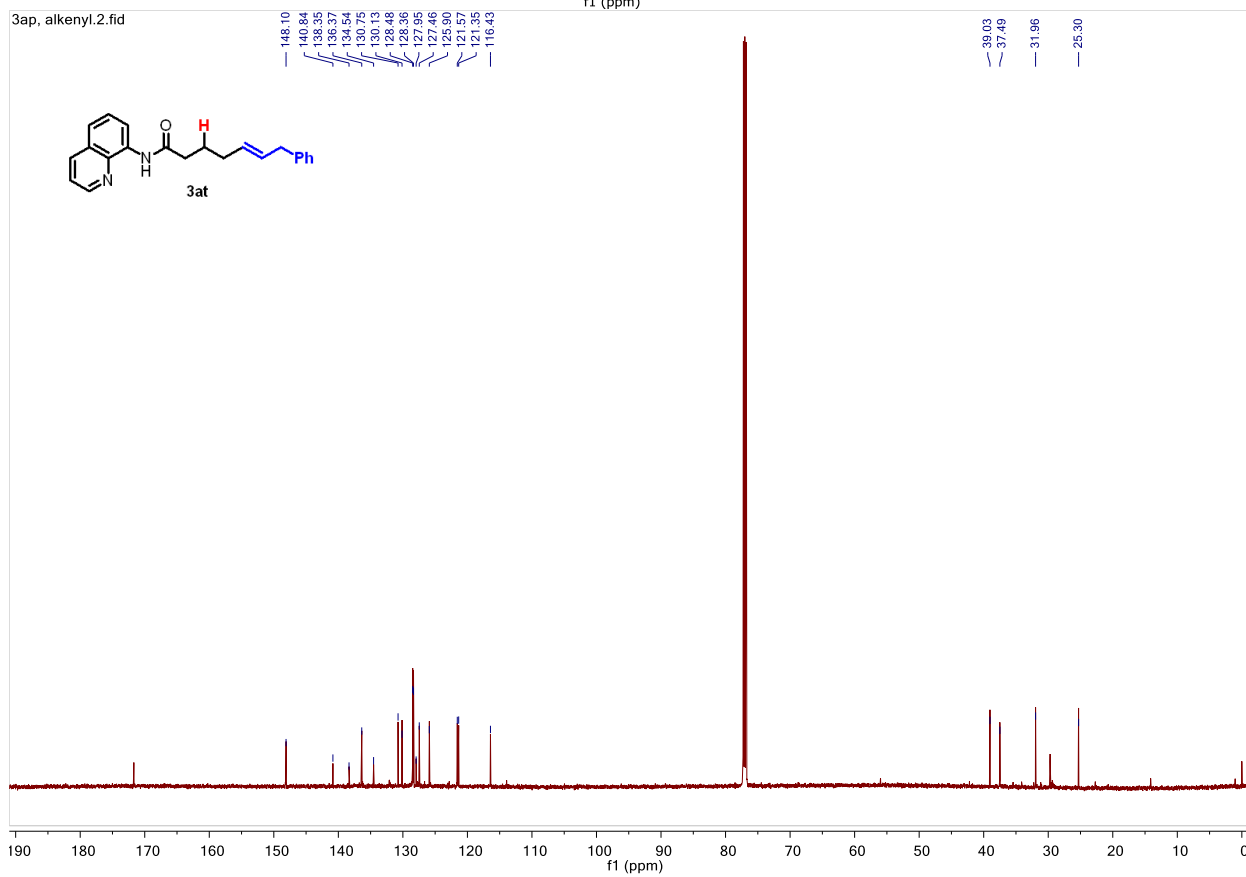

RM-336-b.1.fid

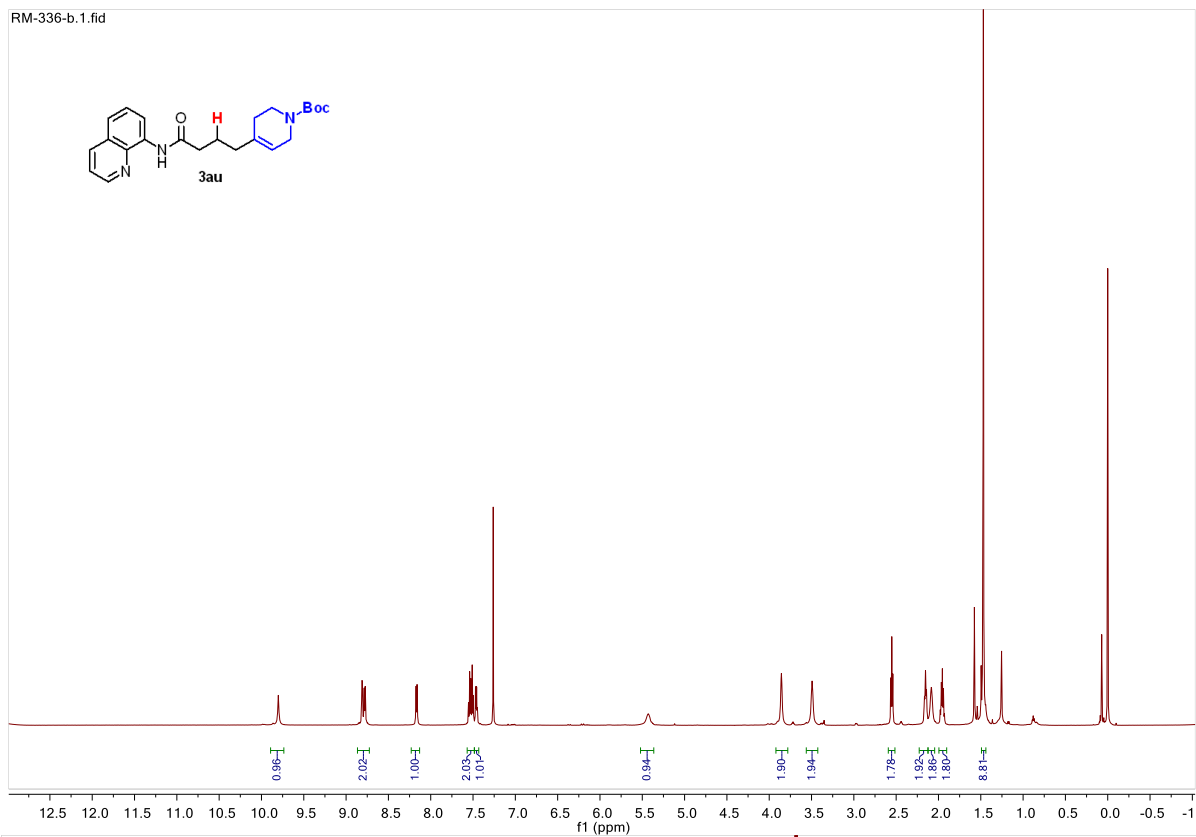

Downloads.4.fid

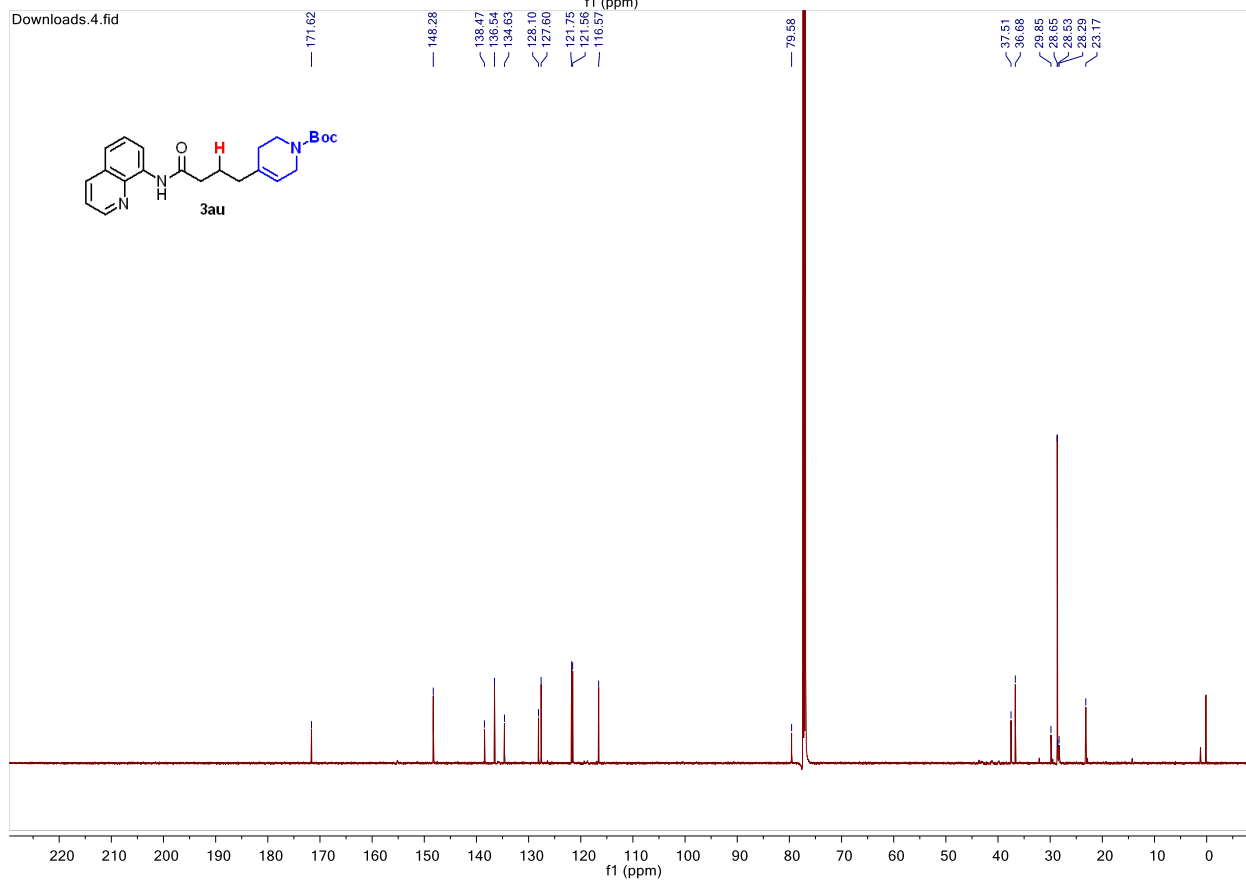

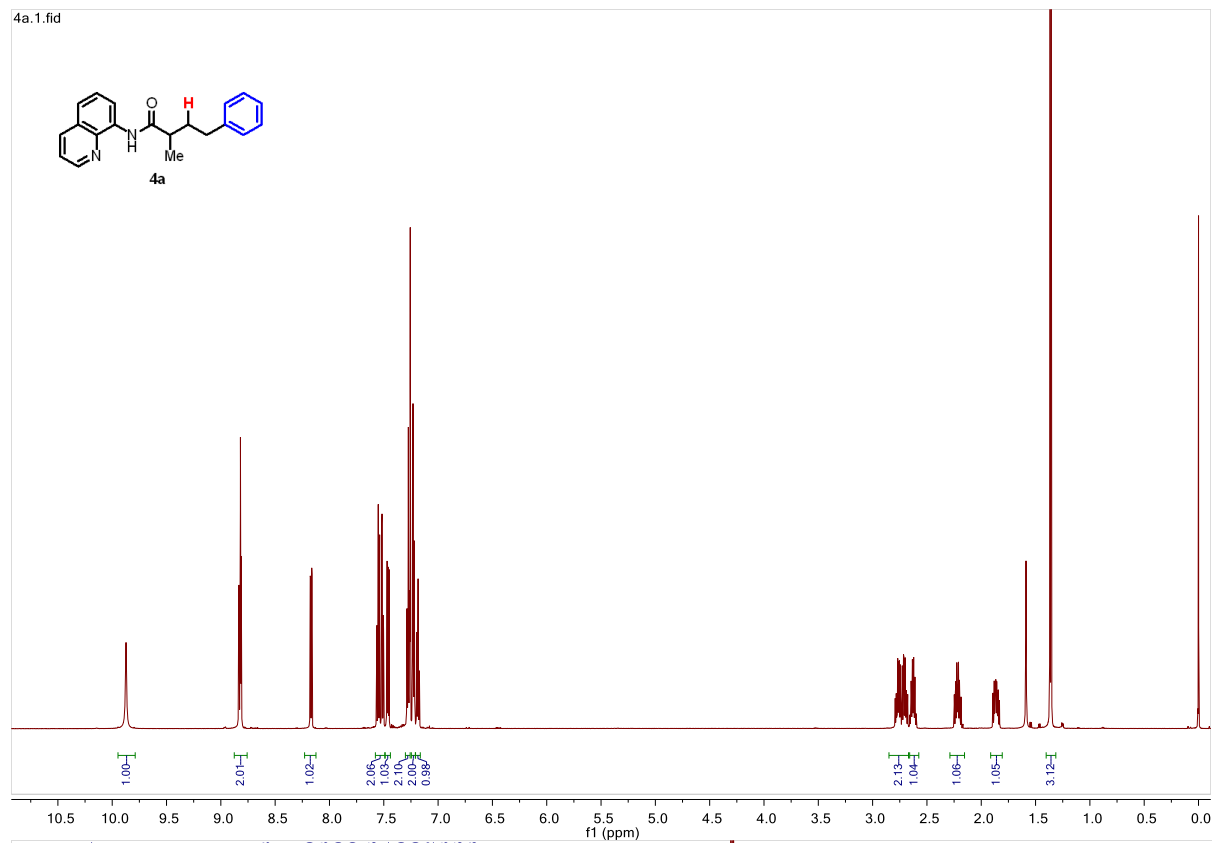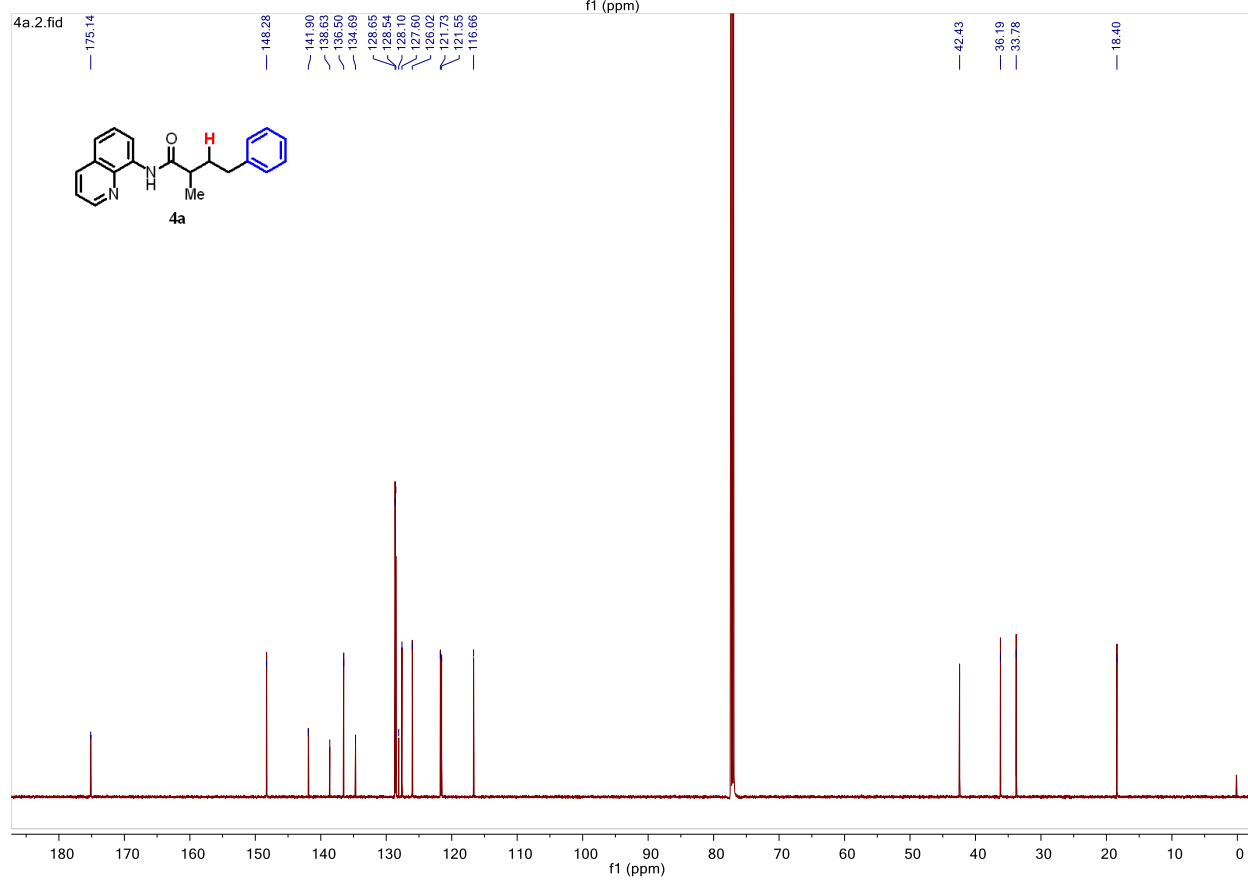



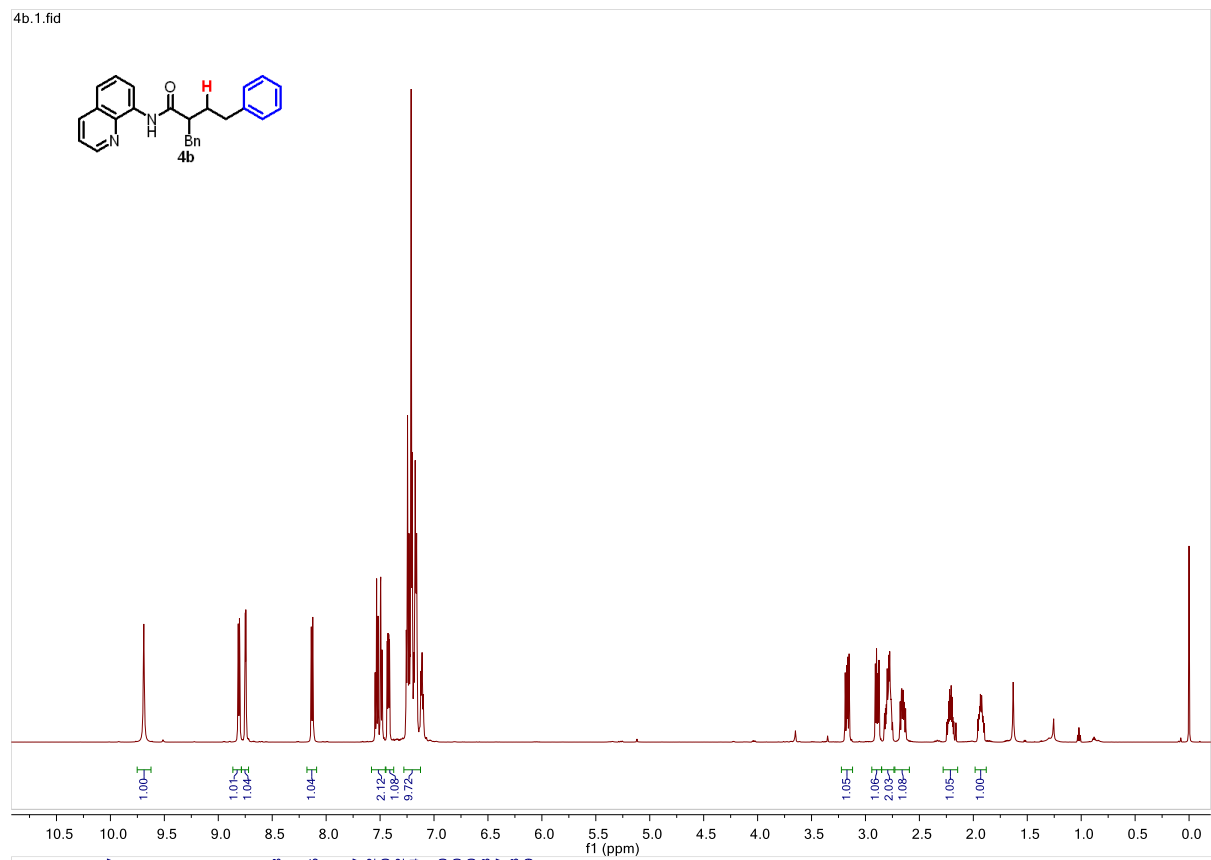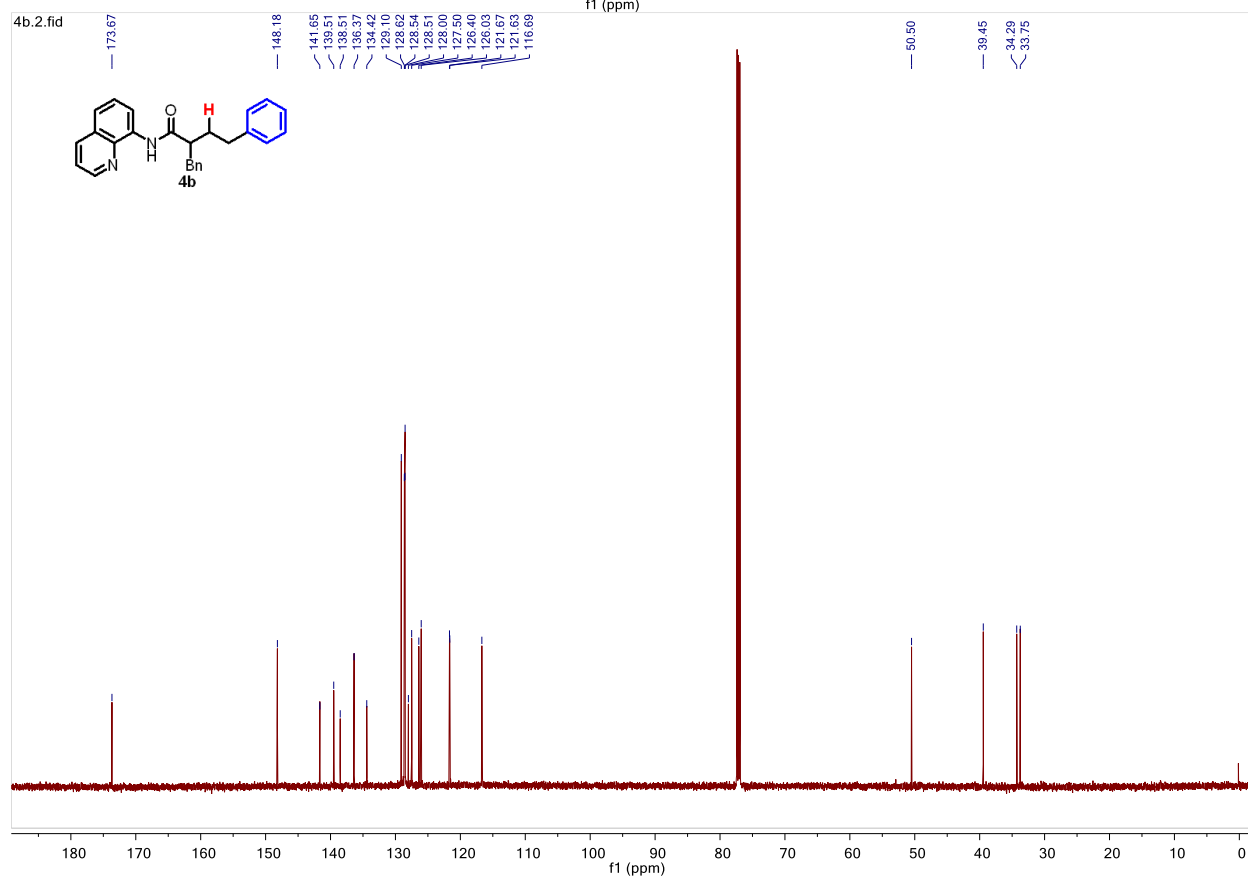

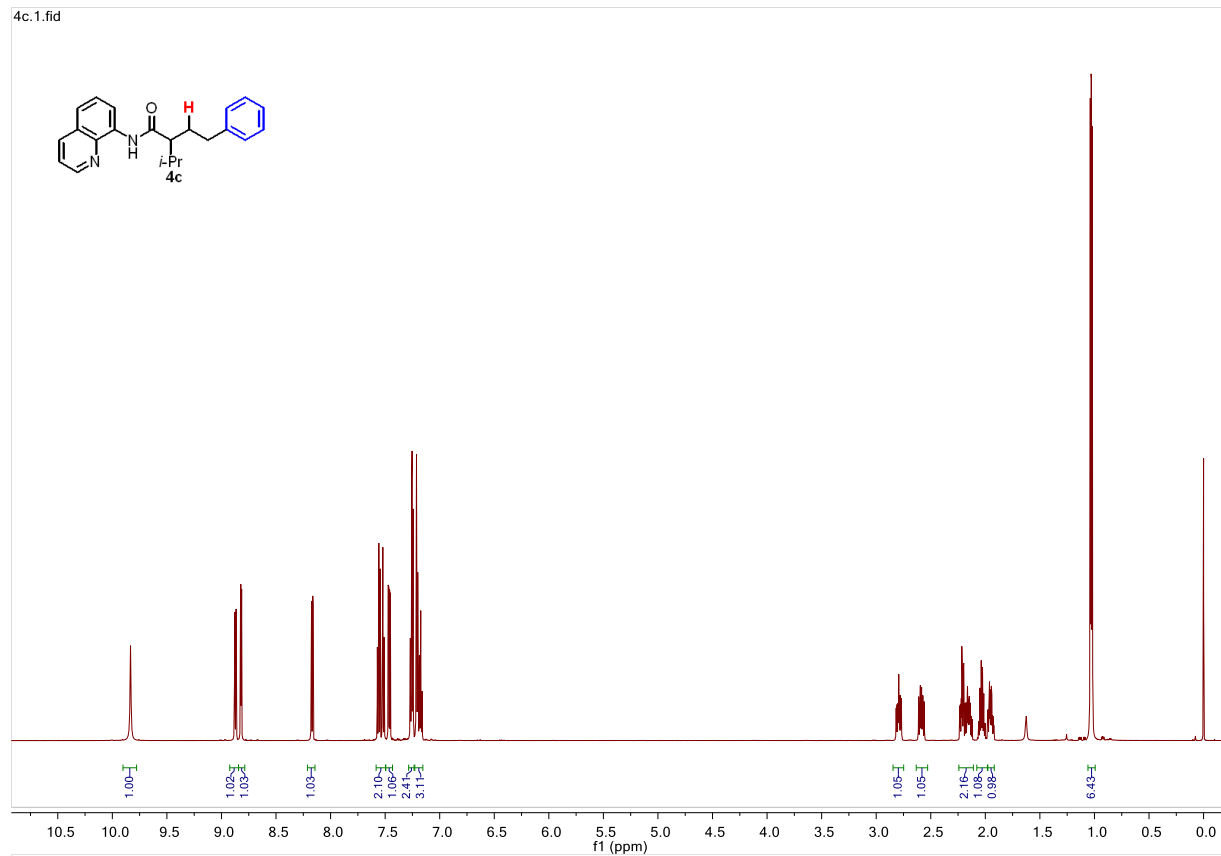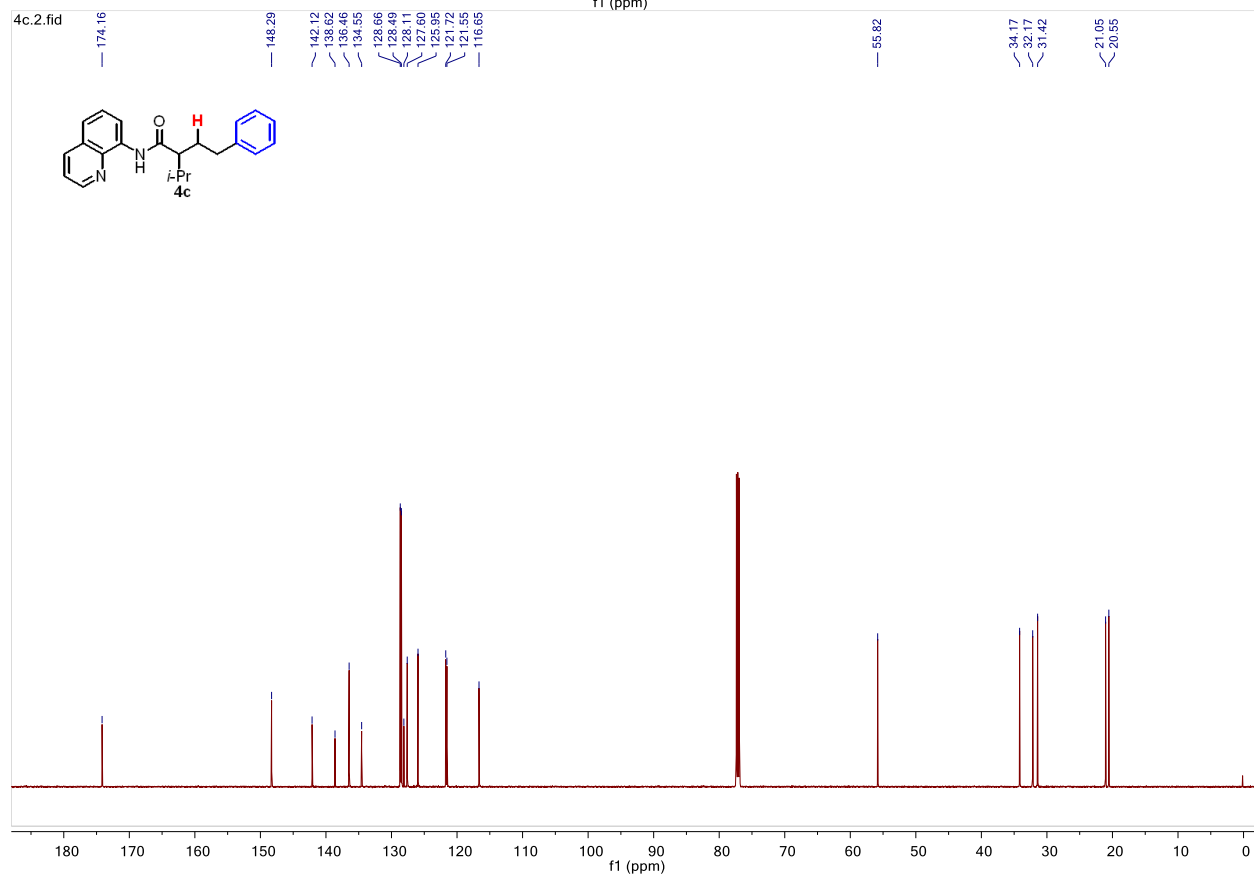

4d.1.fid

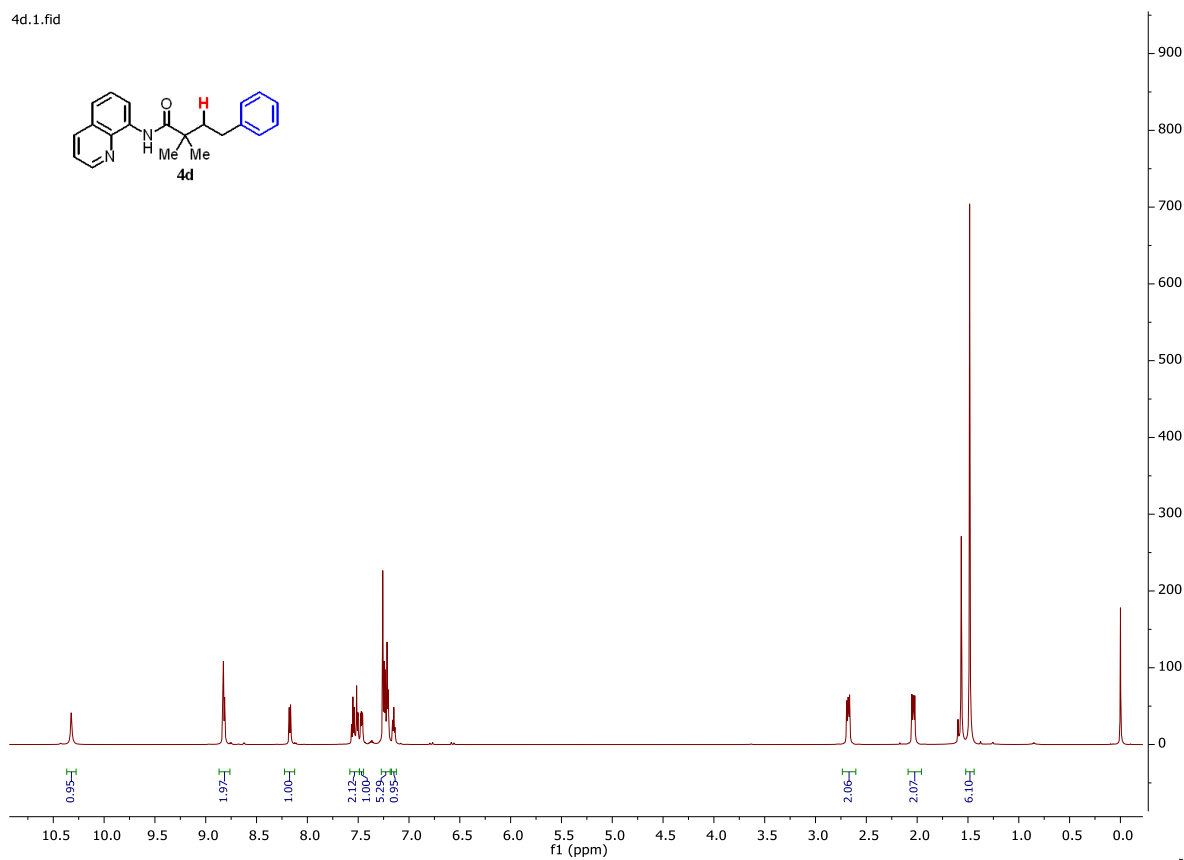

4d.2.fid

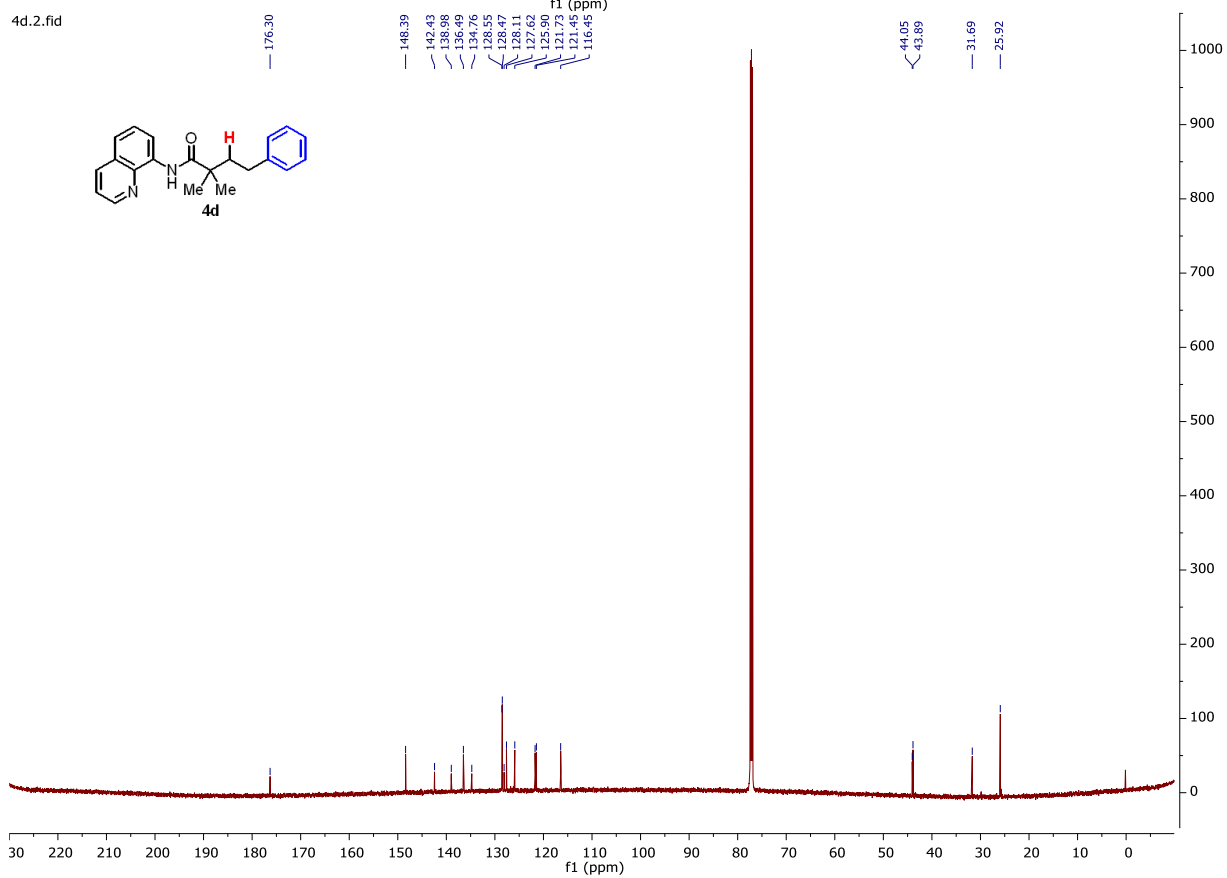

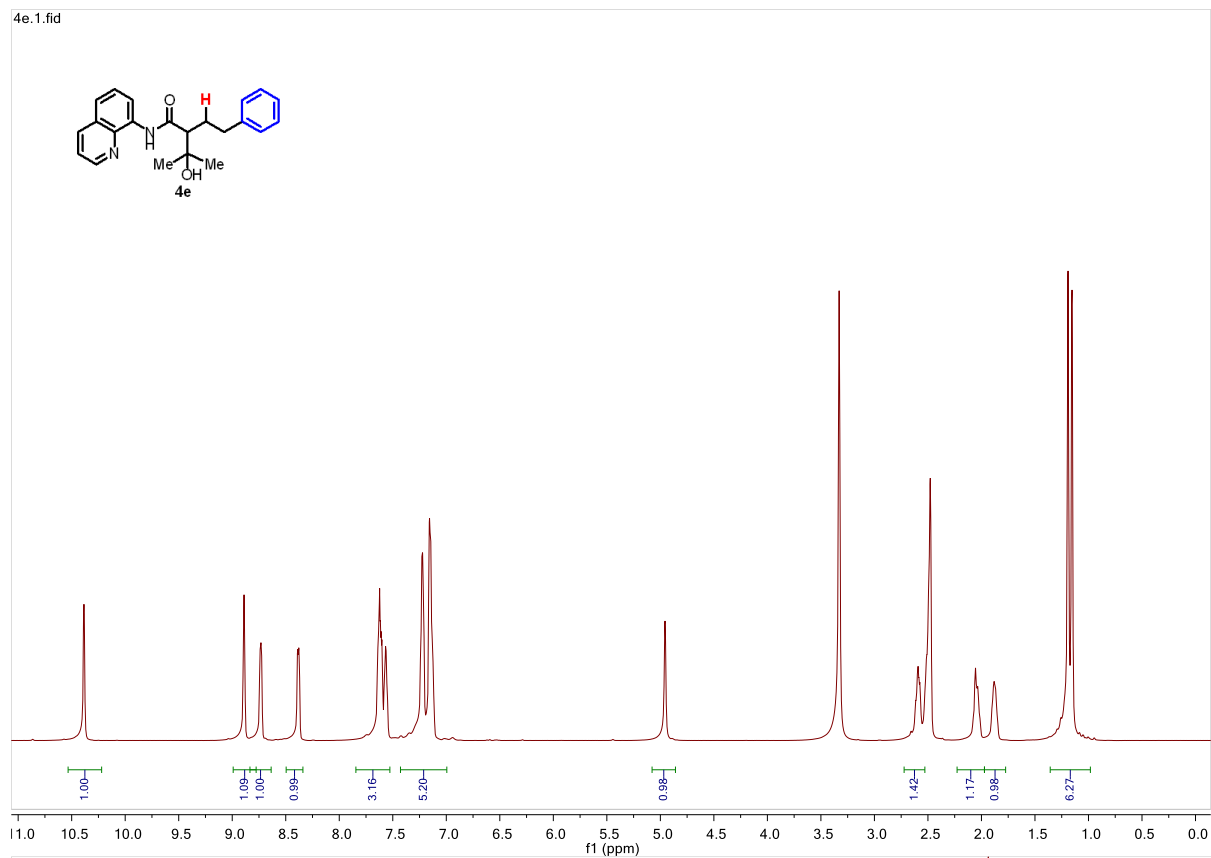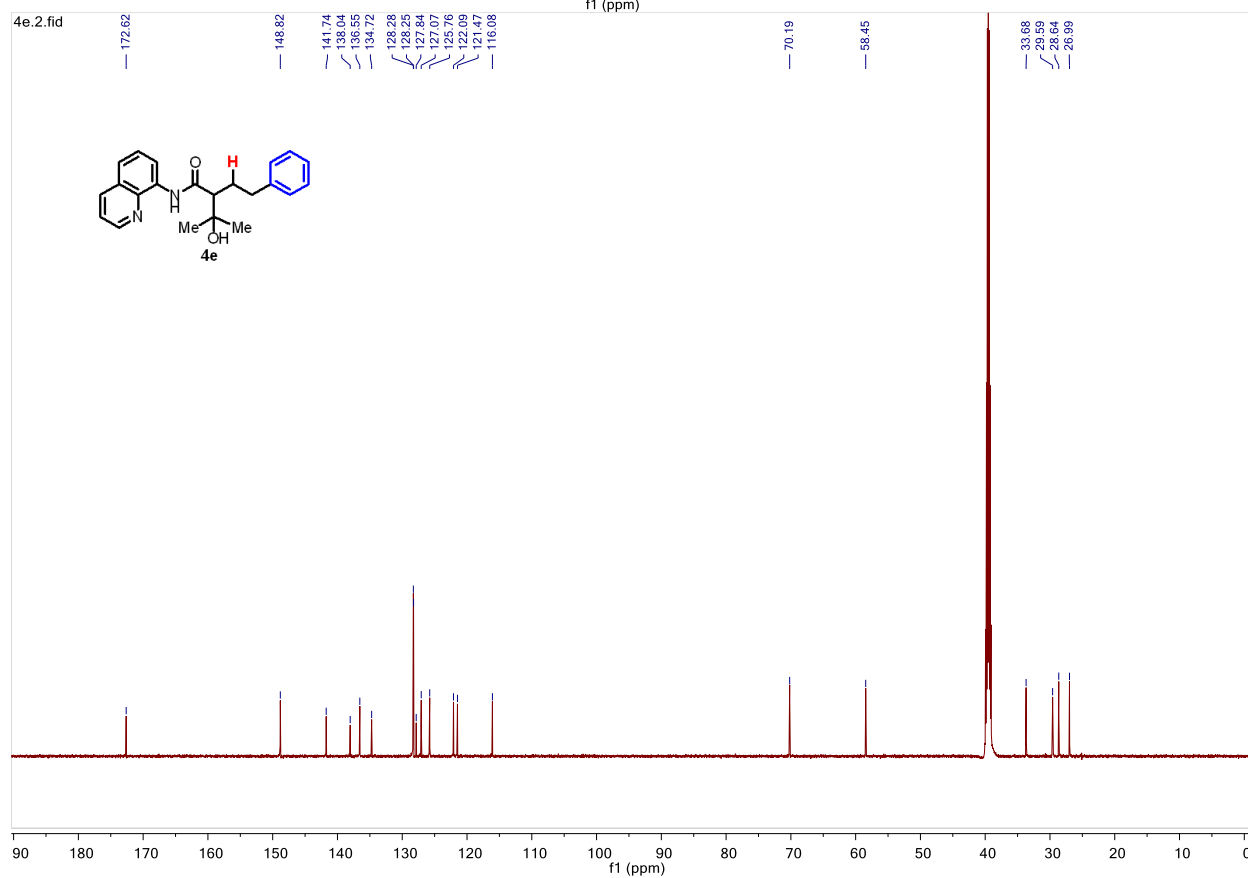

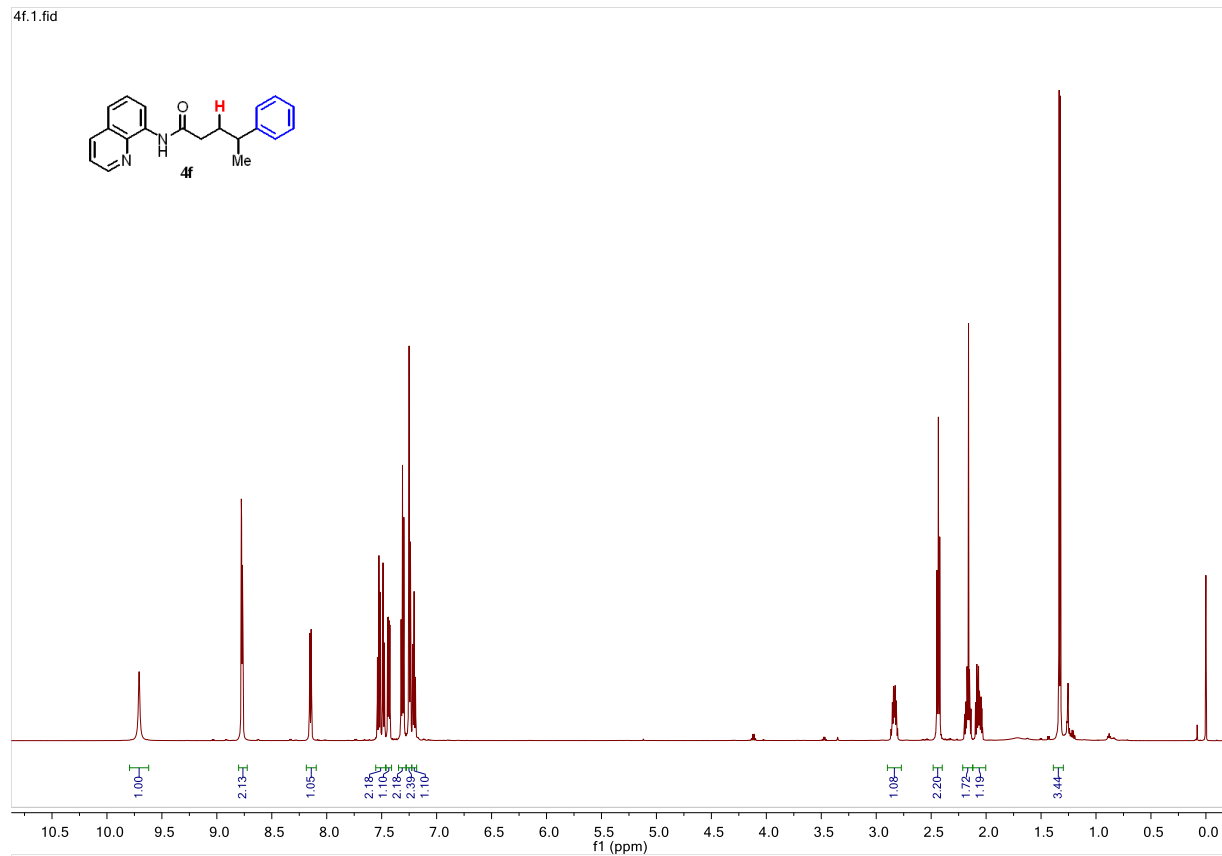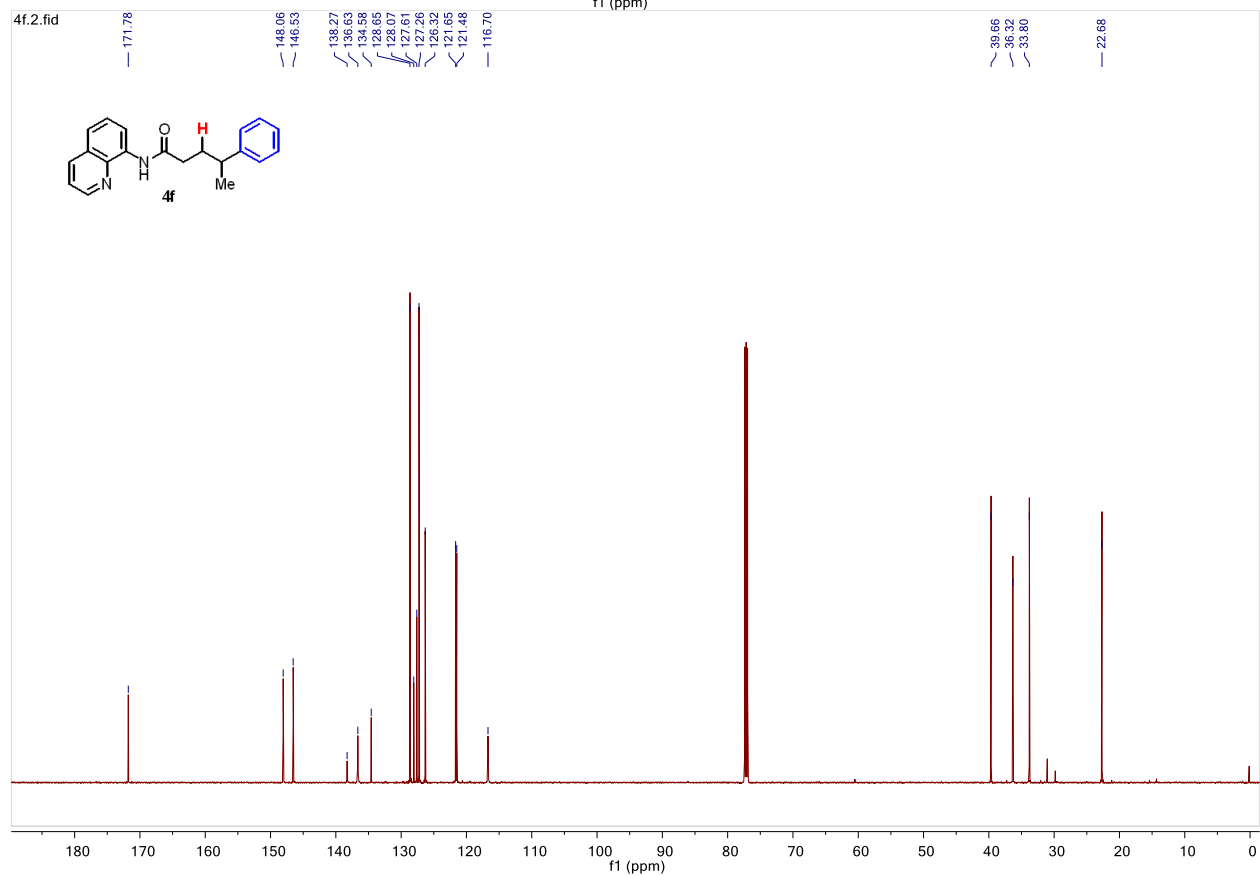

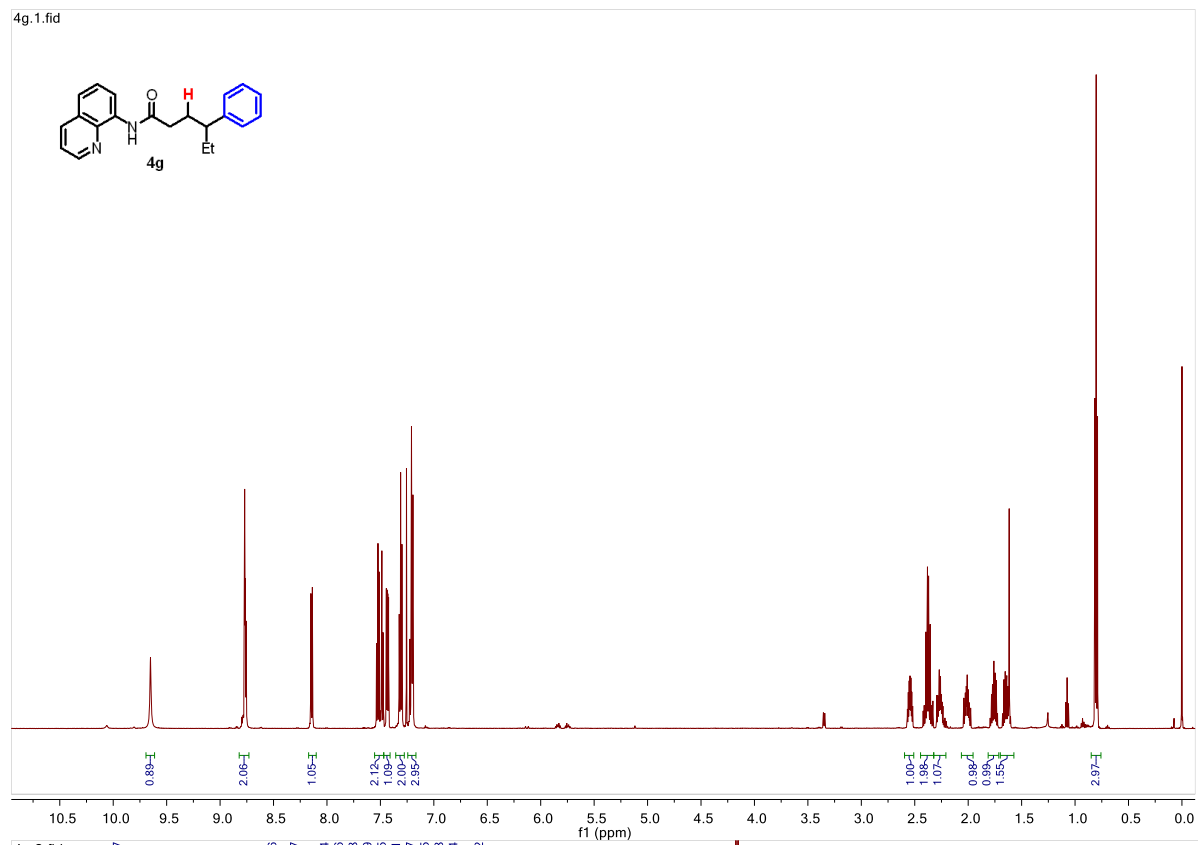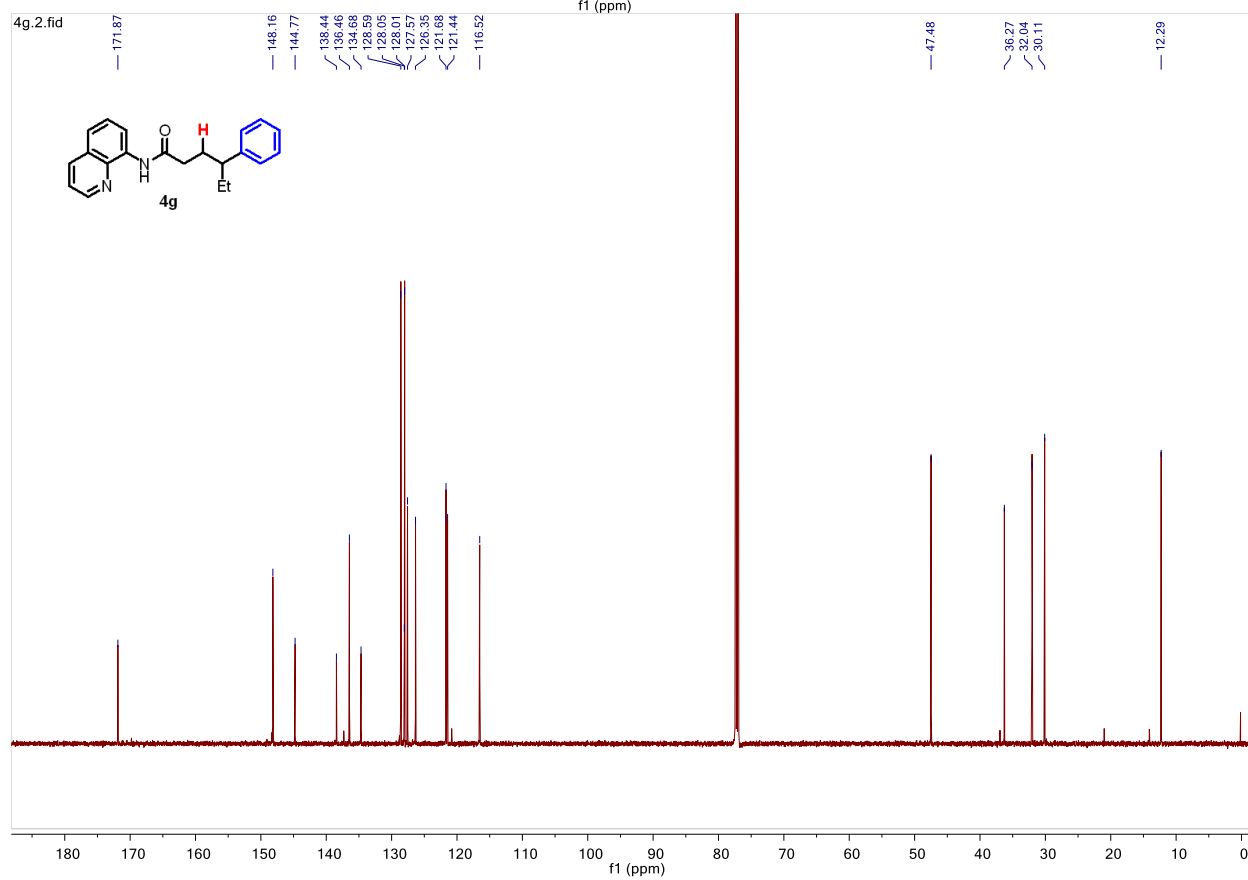

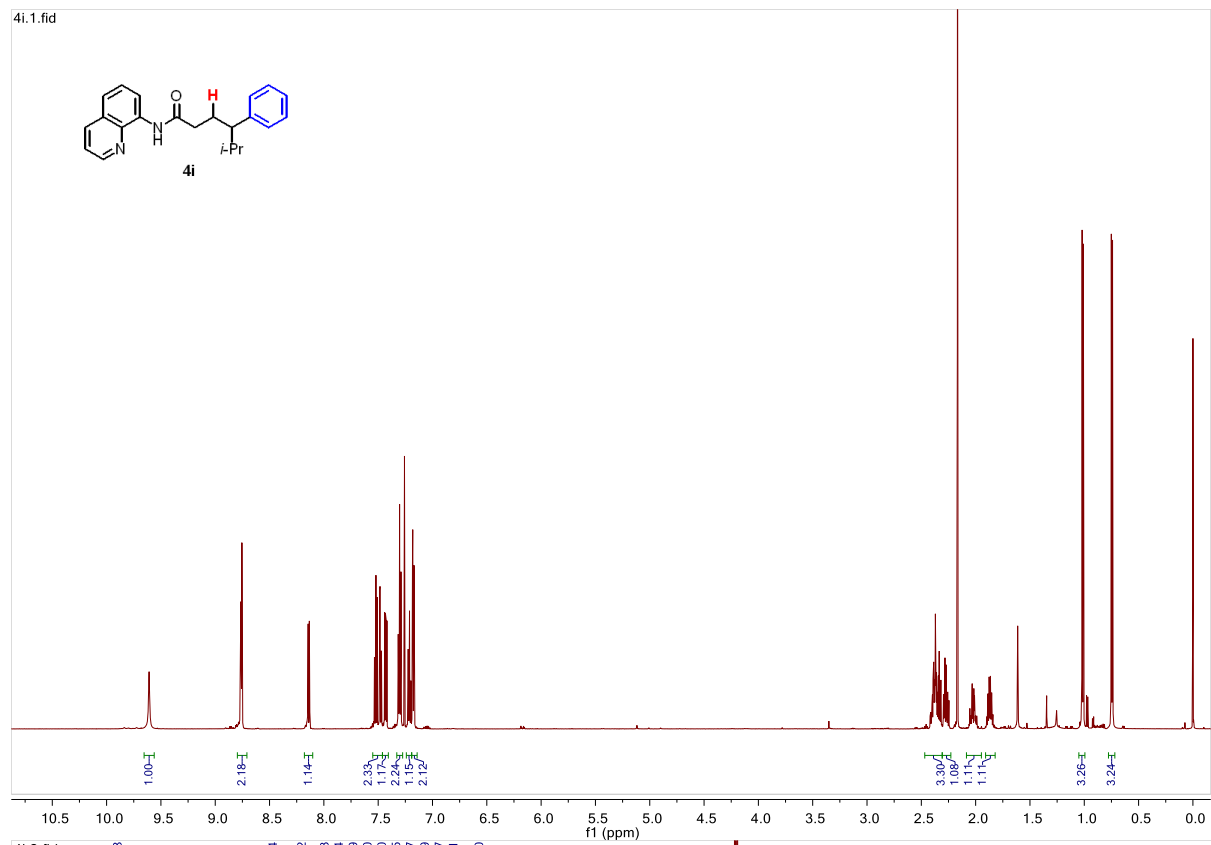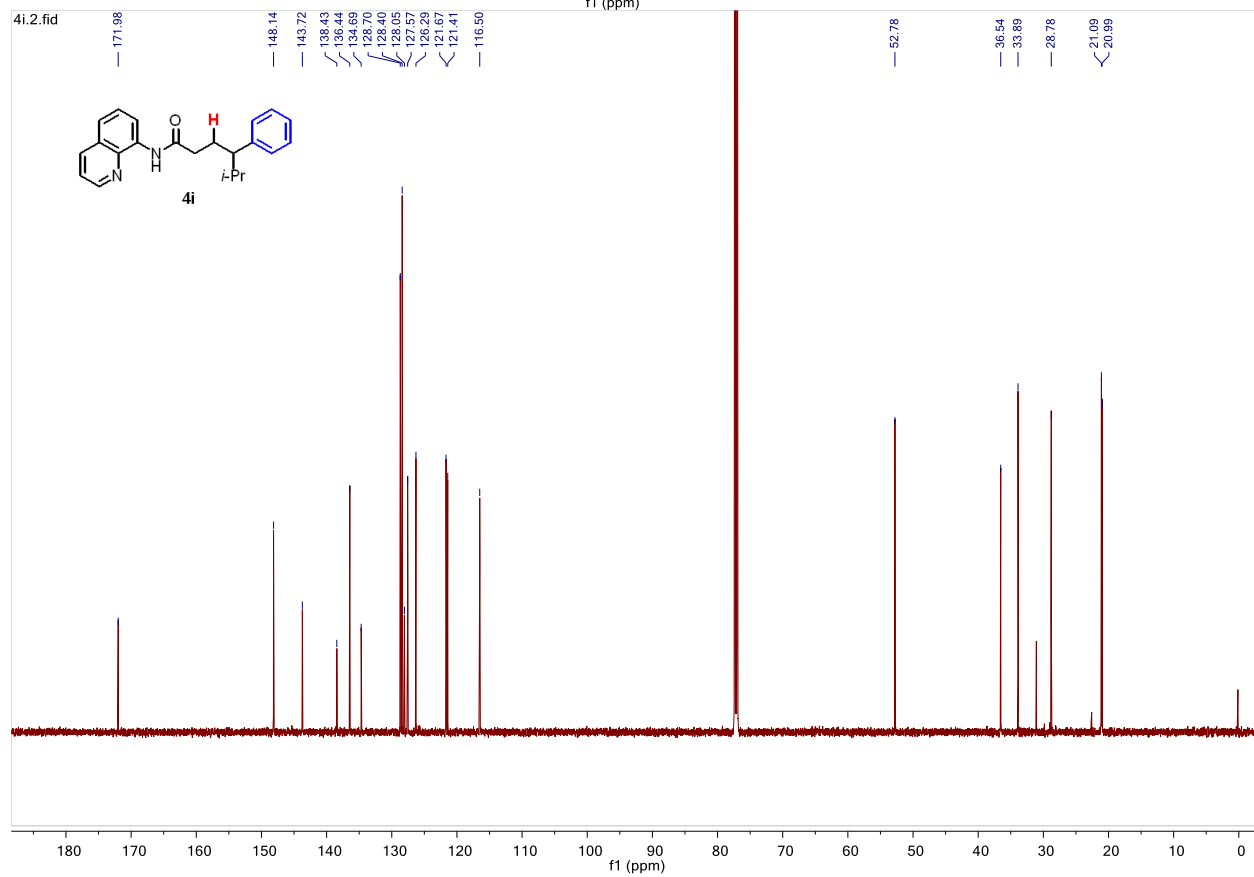

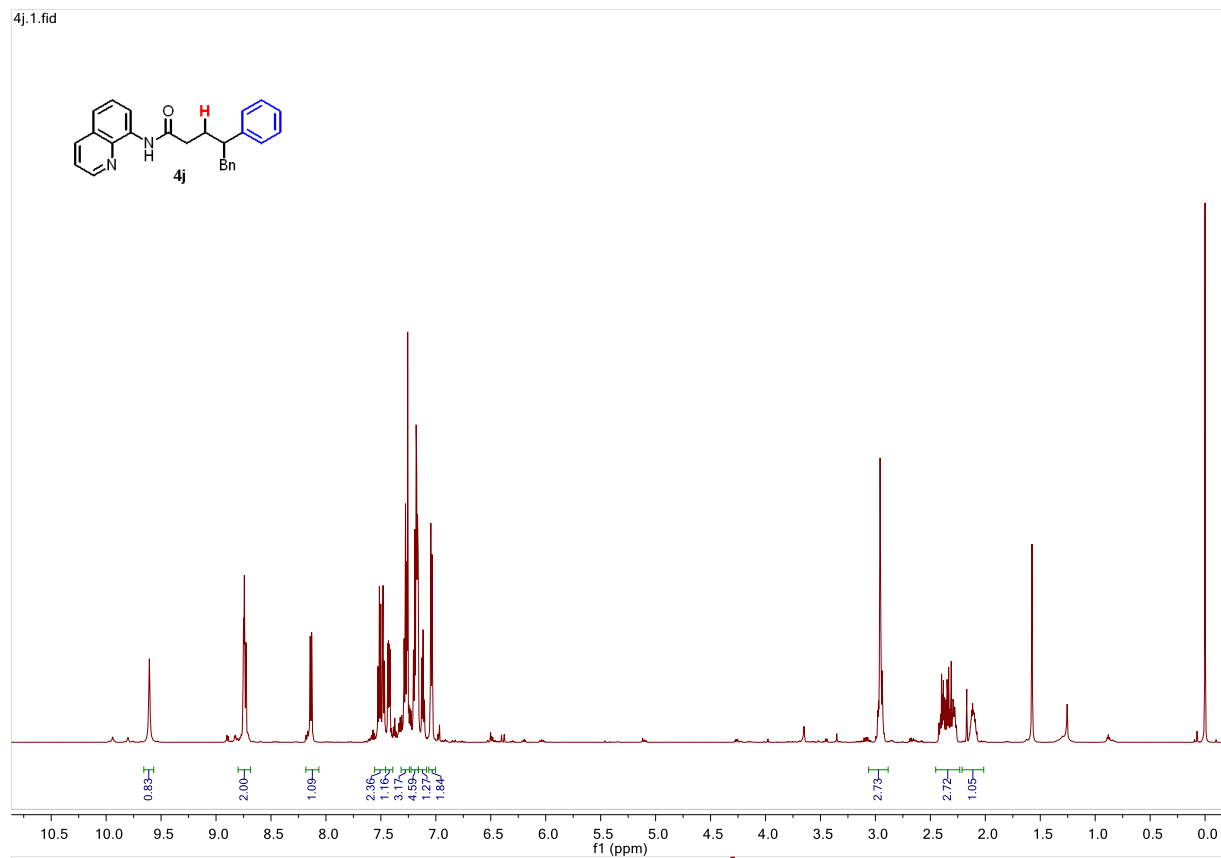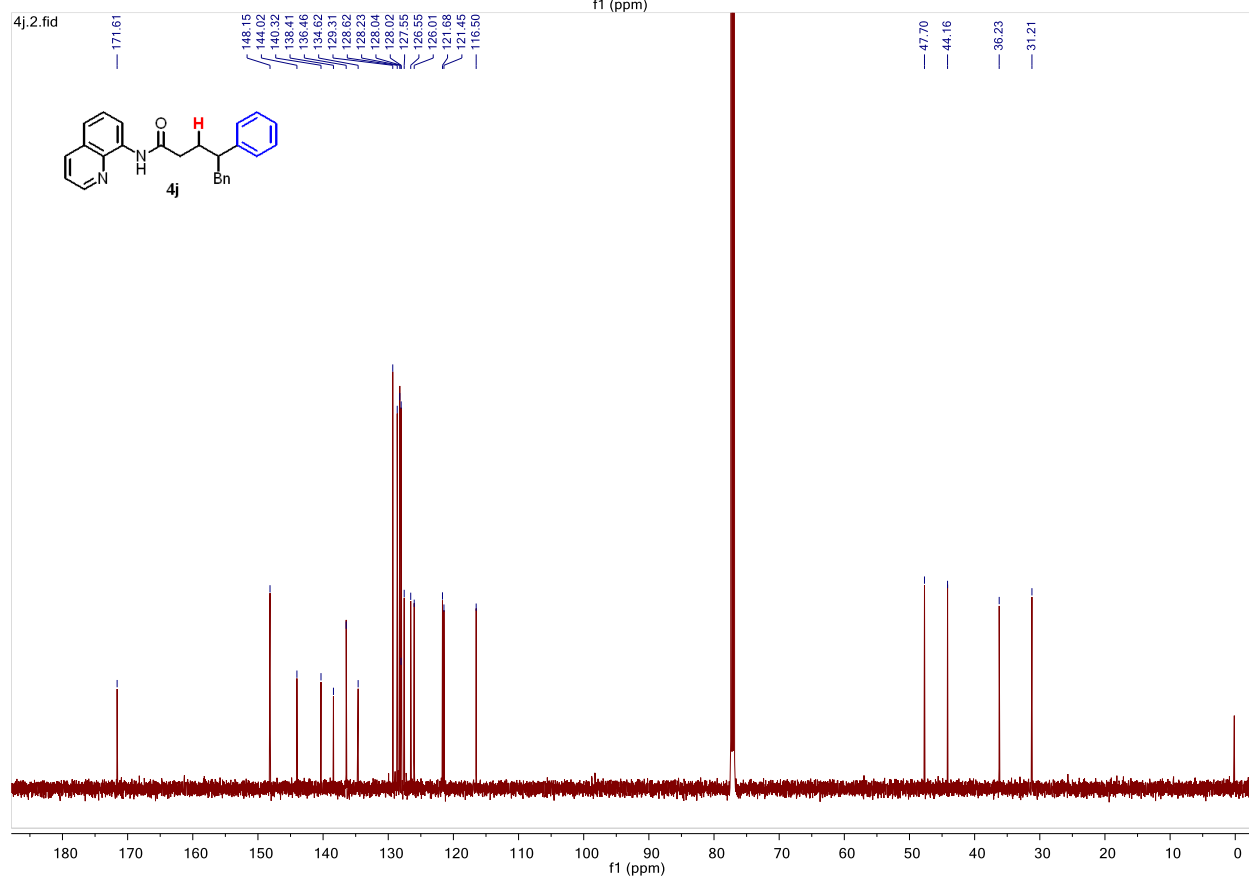



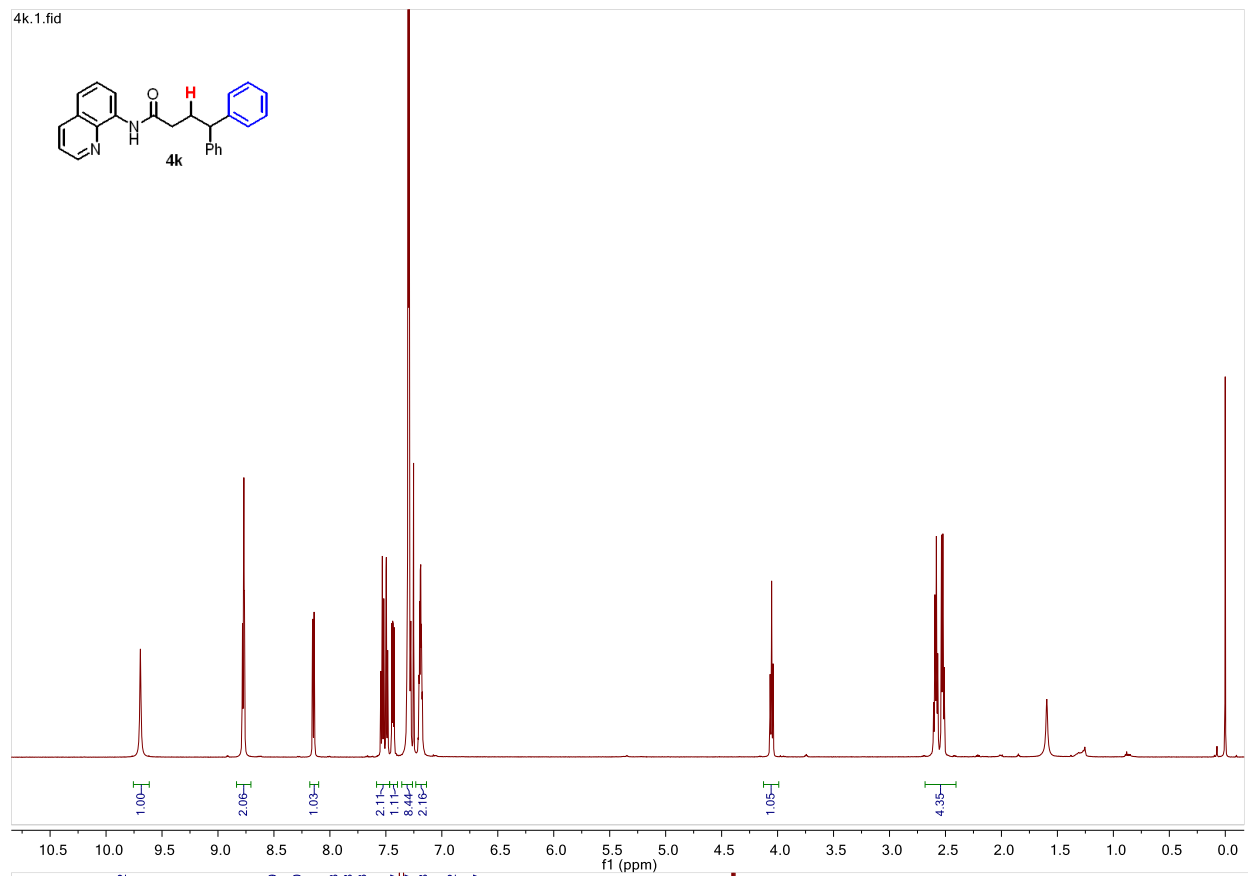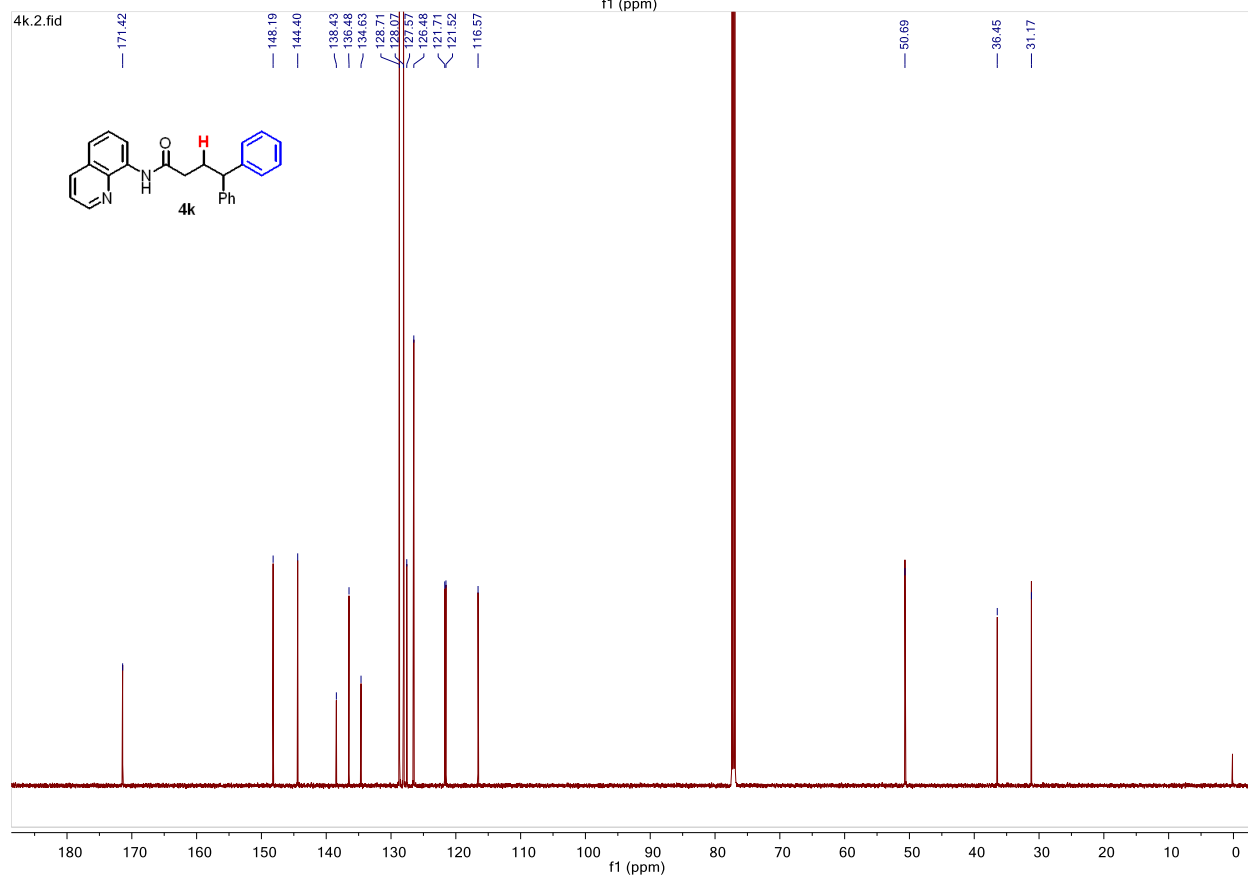

RM-261a-pure.1.fid

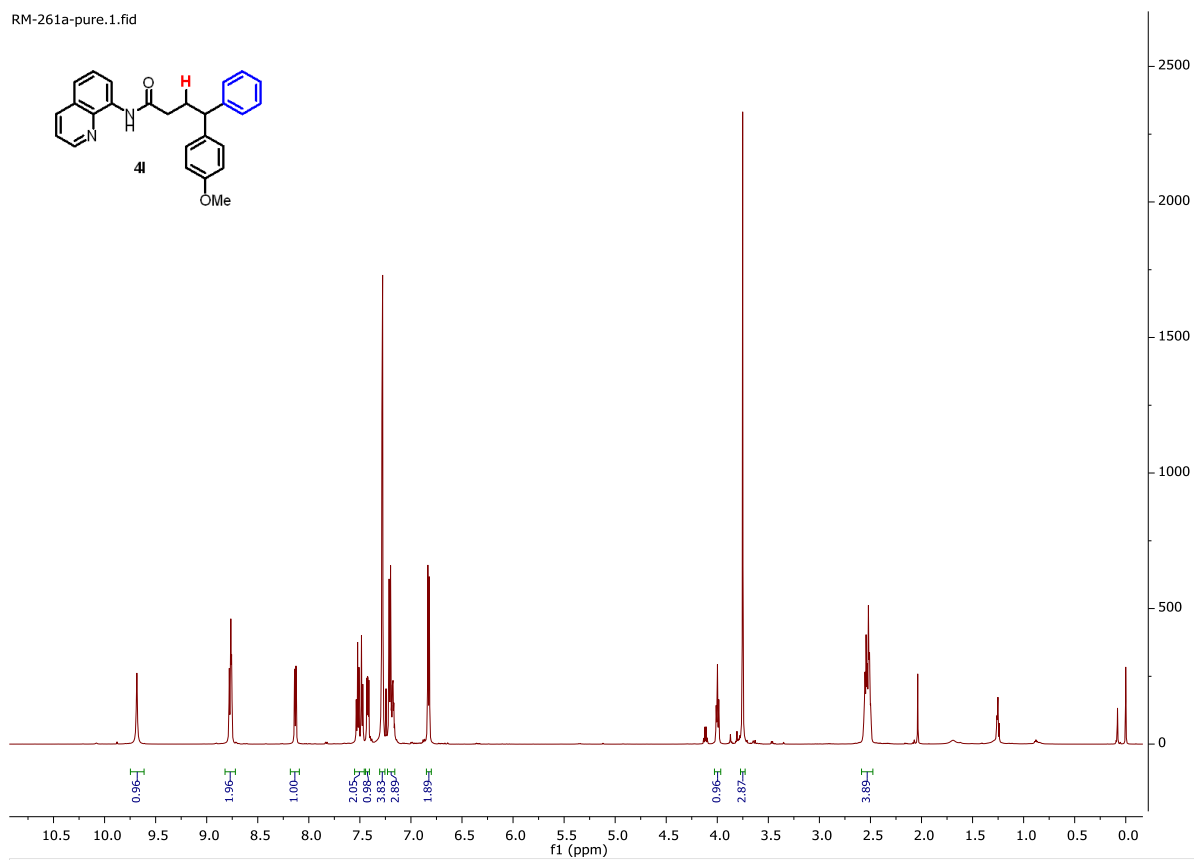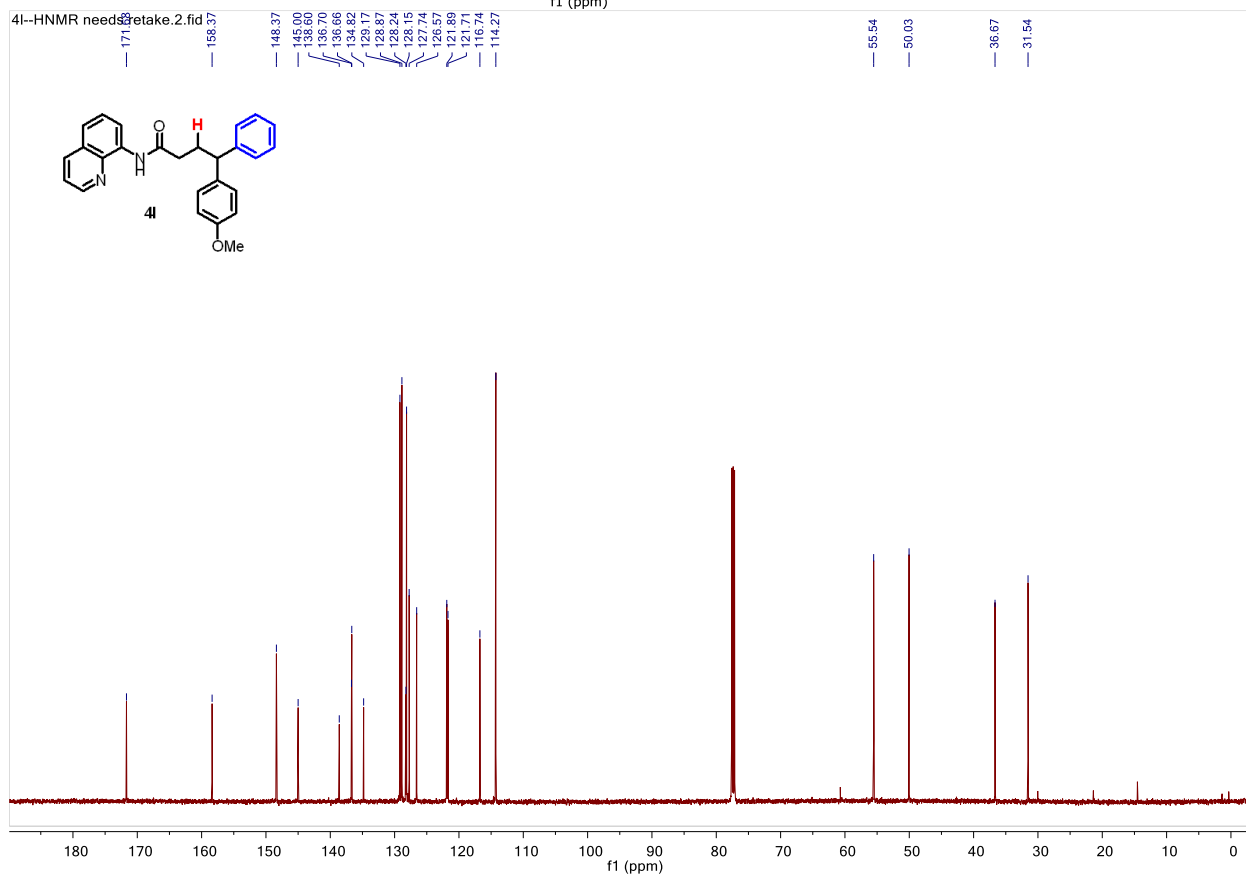

4m.1.fid

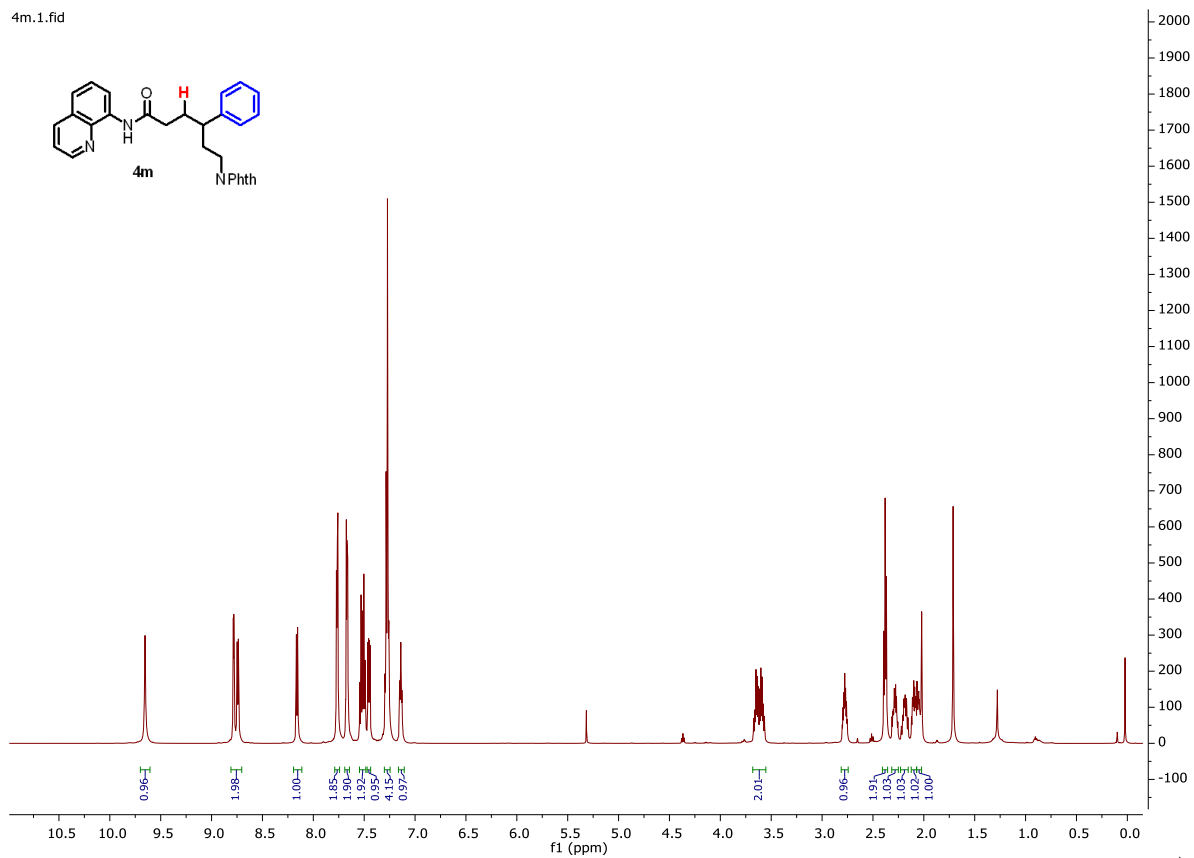

4m.2.fid

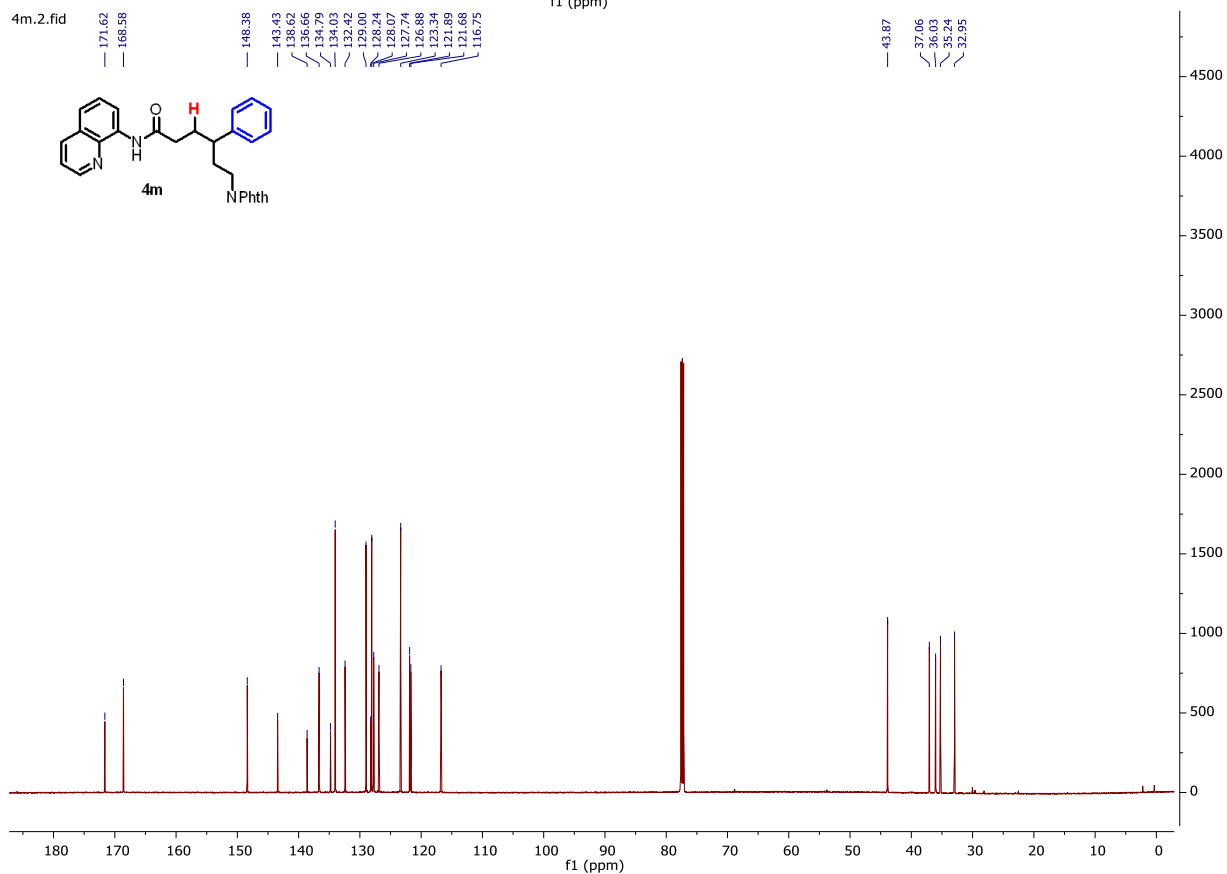

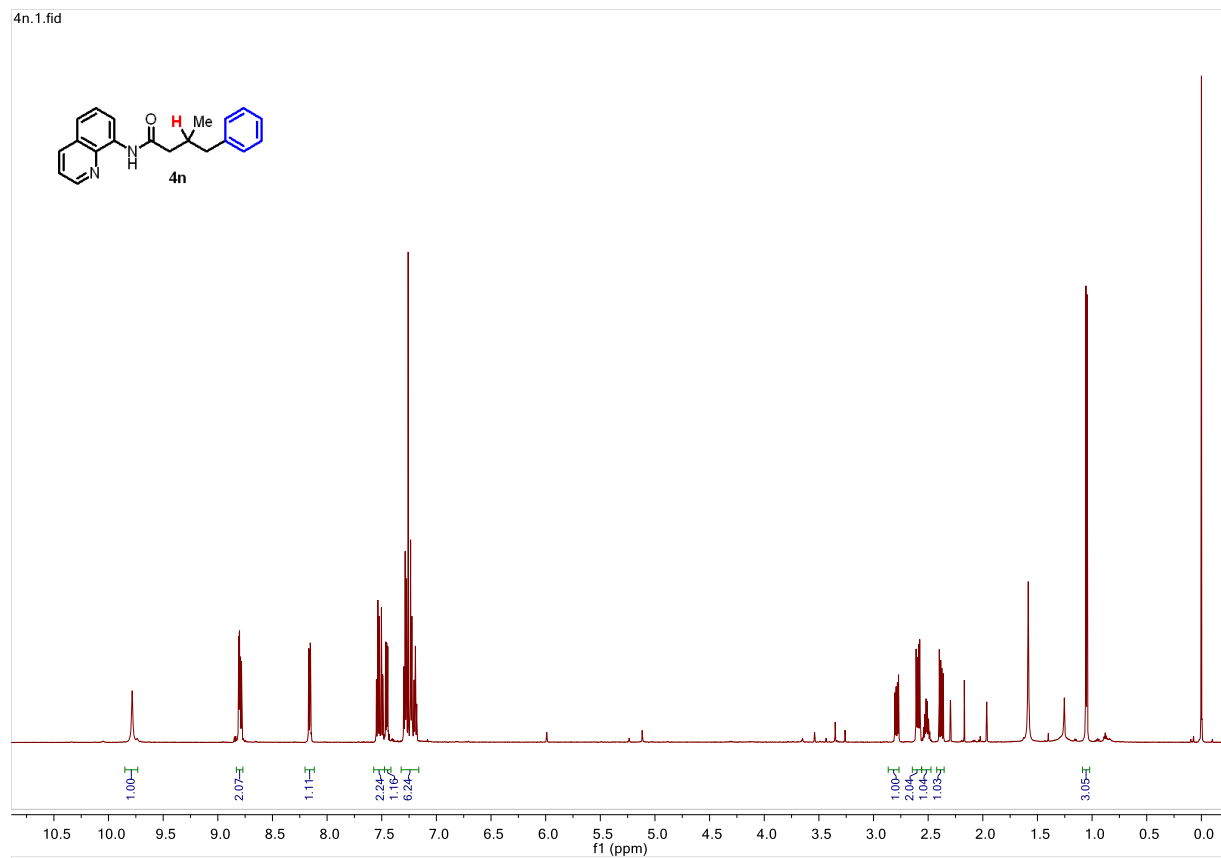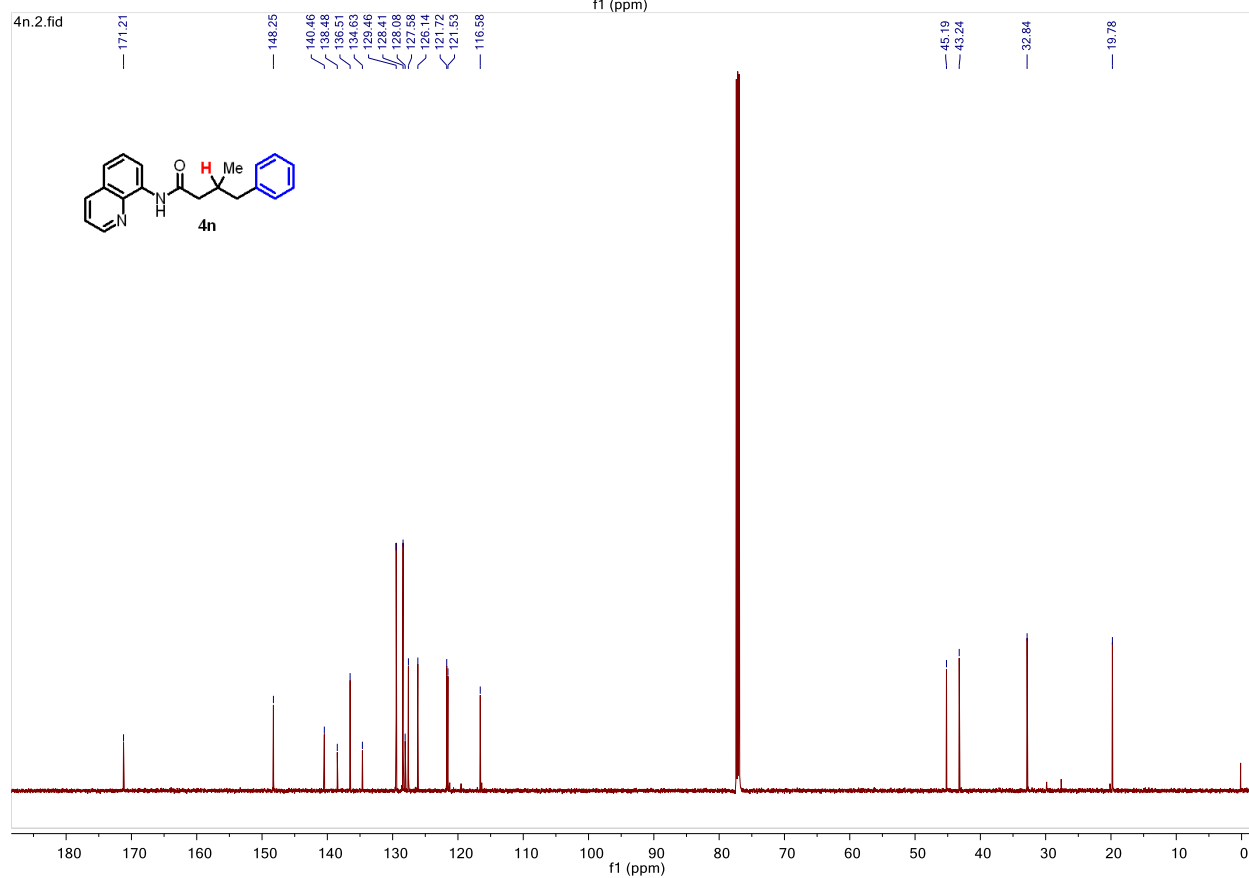

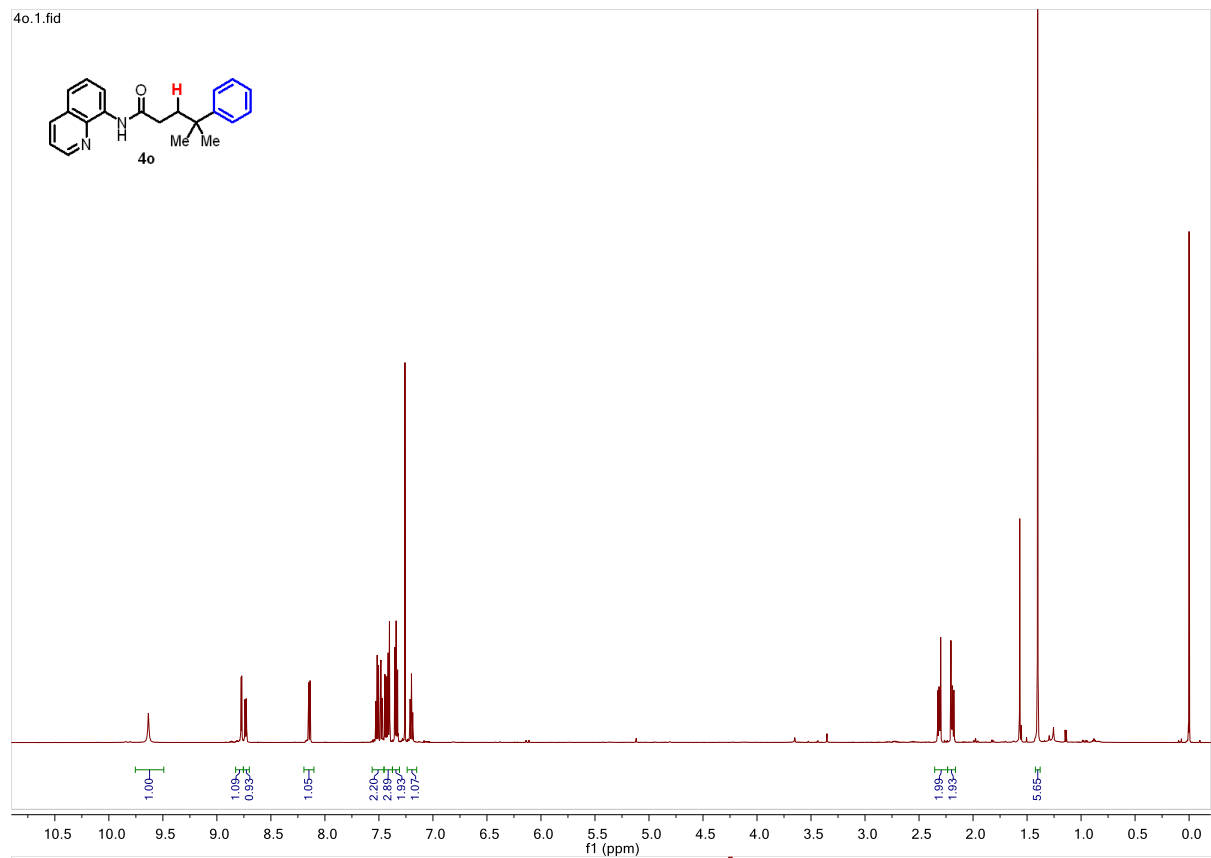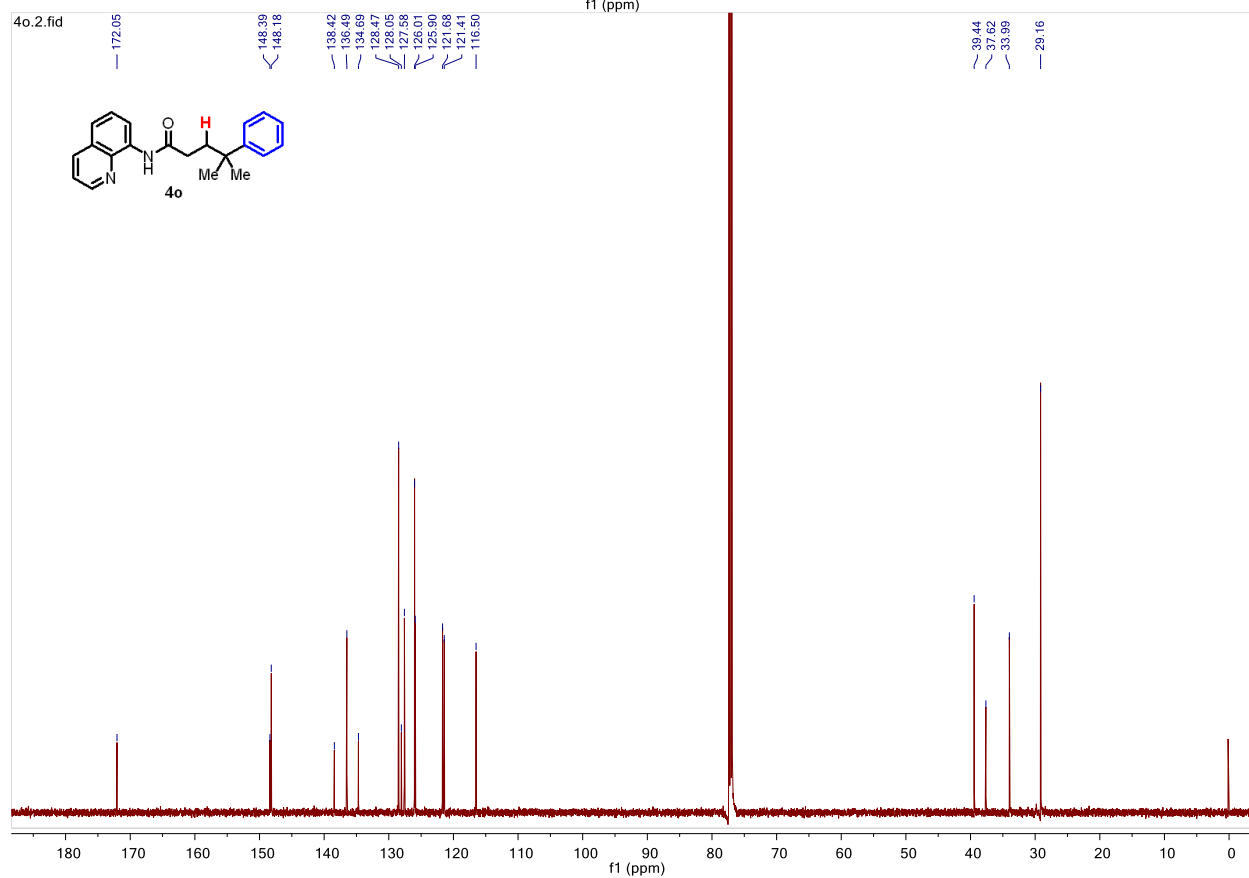

4p--need to add 2D.1.fid

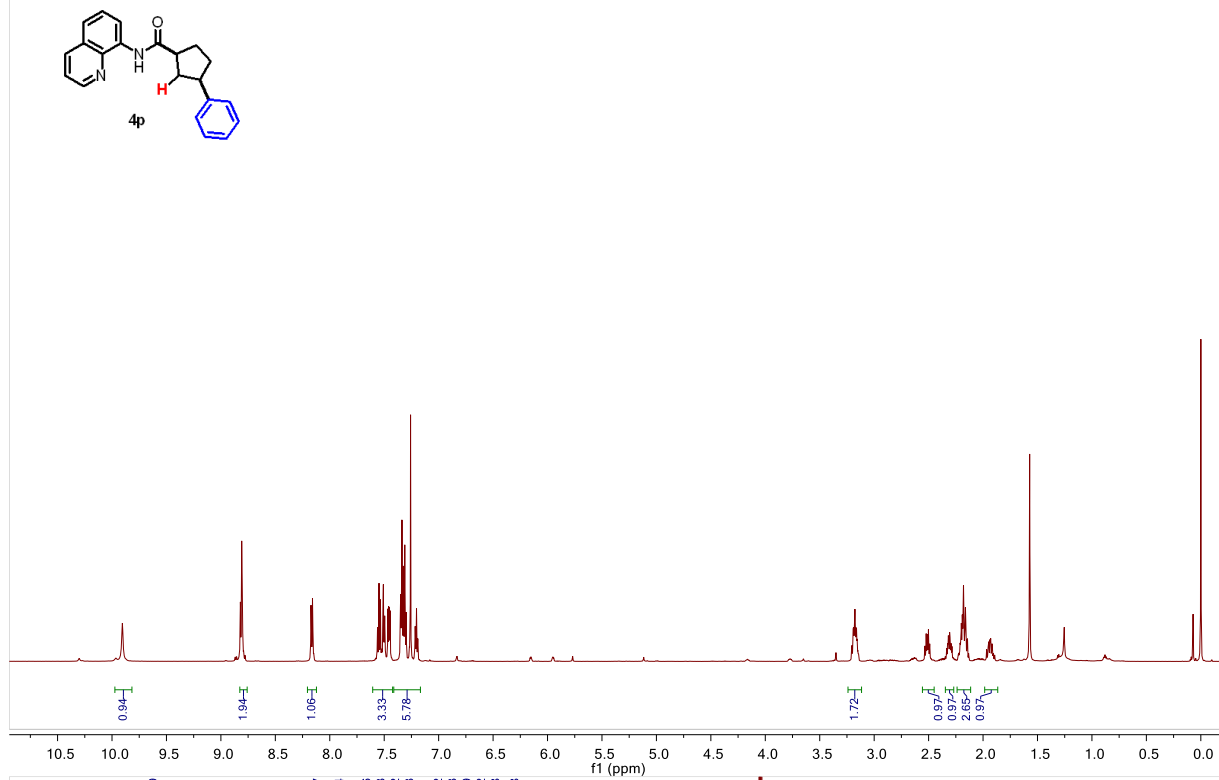

4p--need to add 2D.2.fid

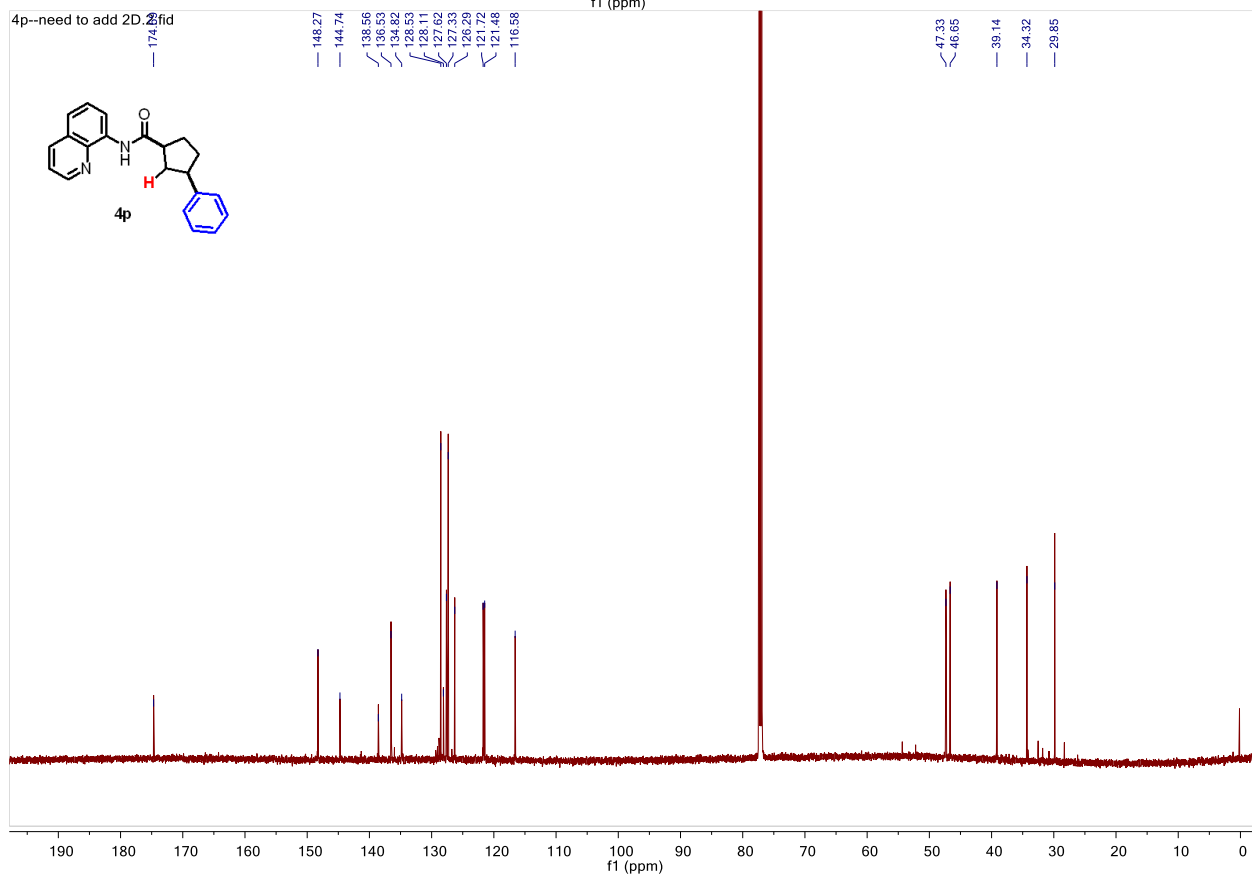

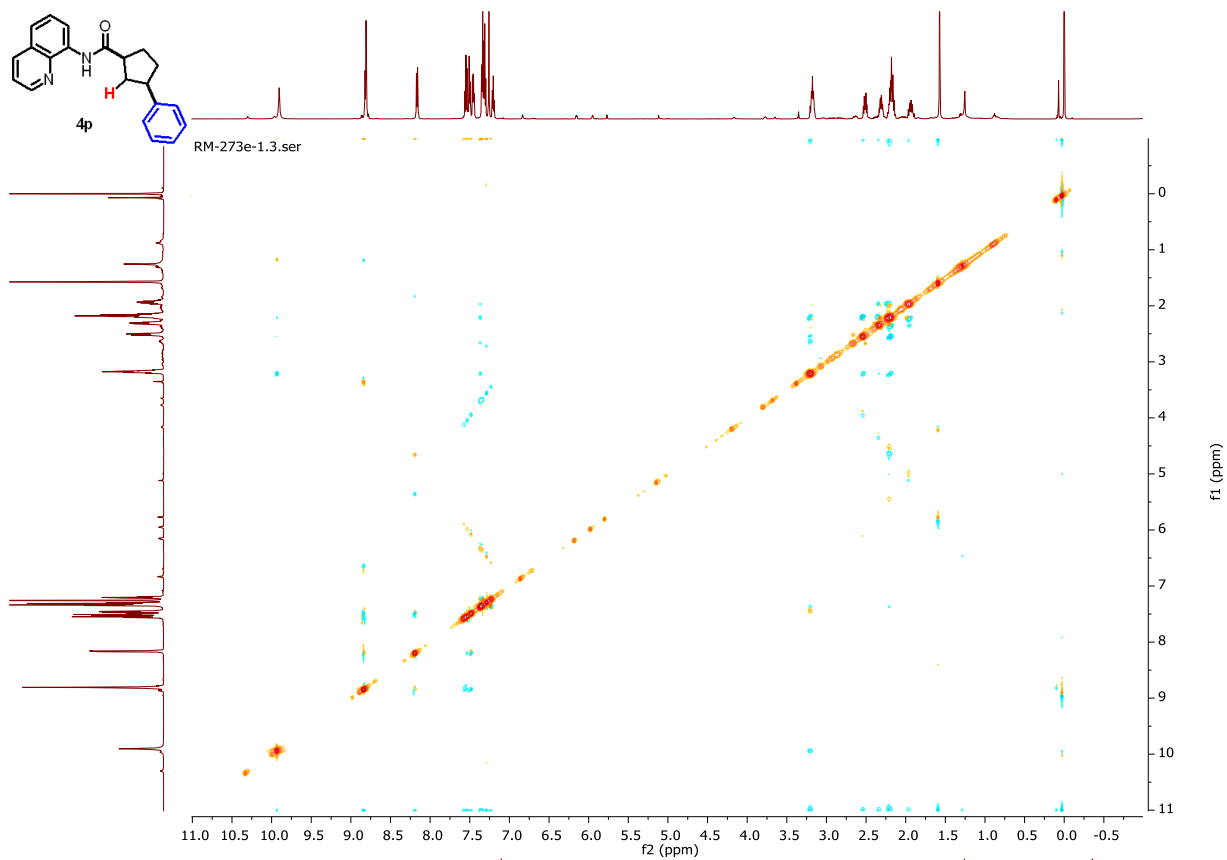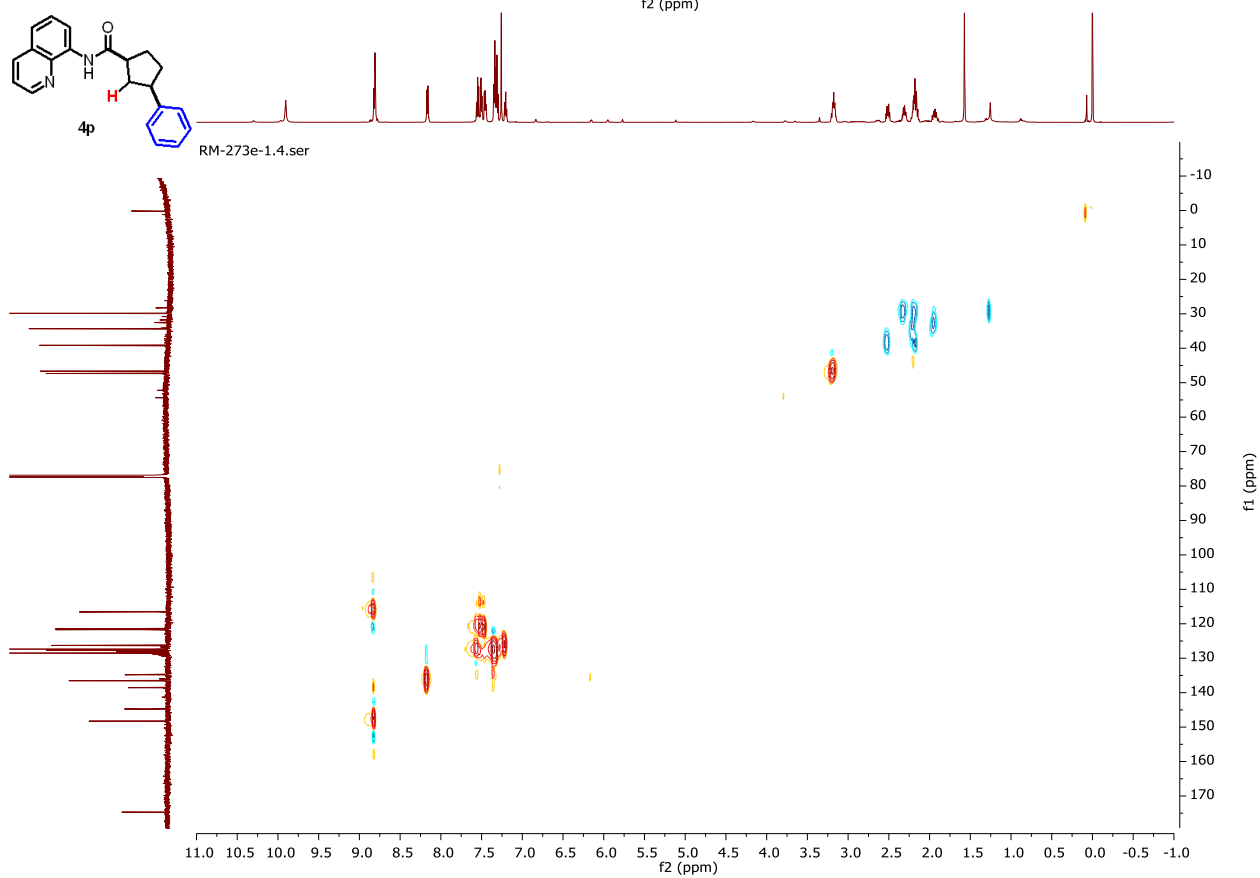

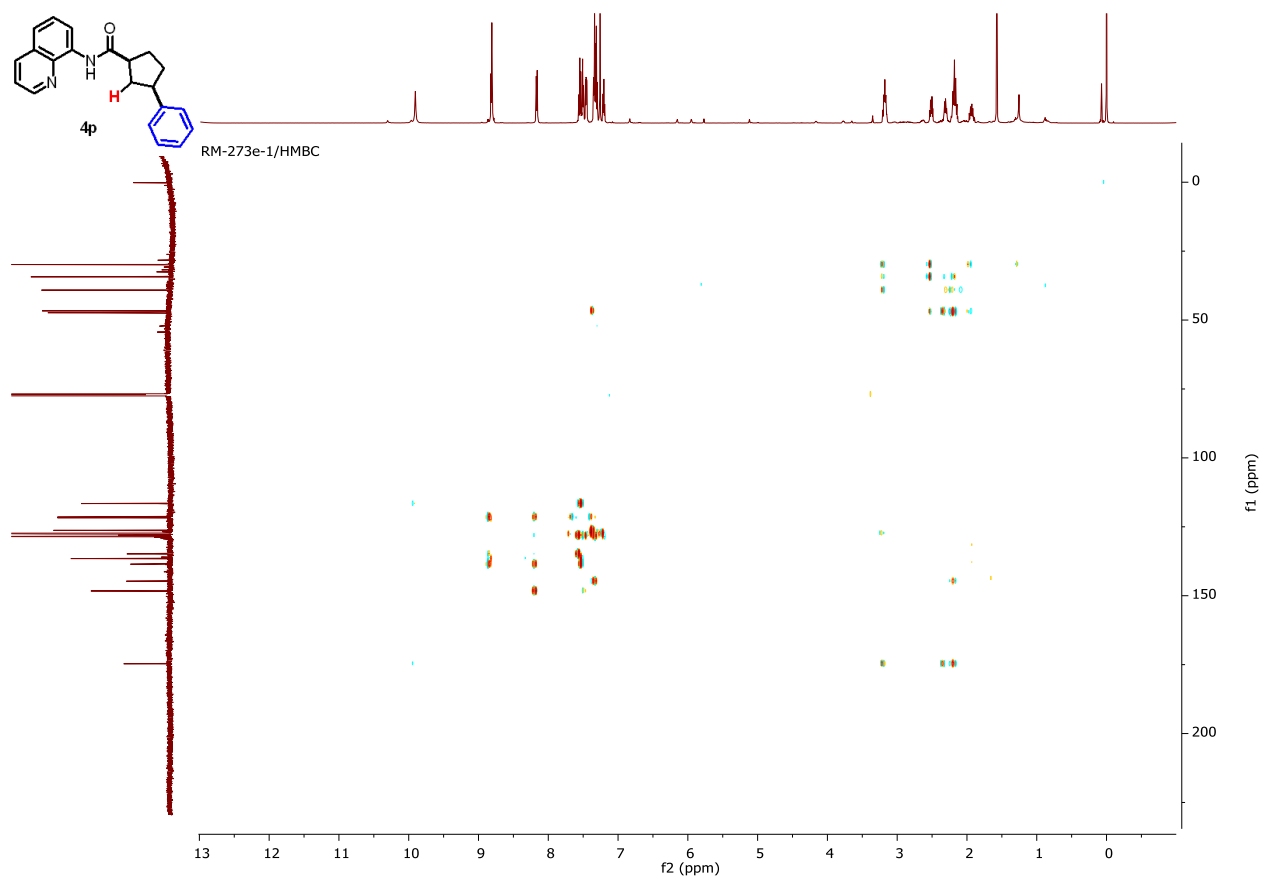



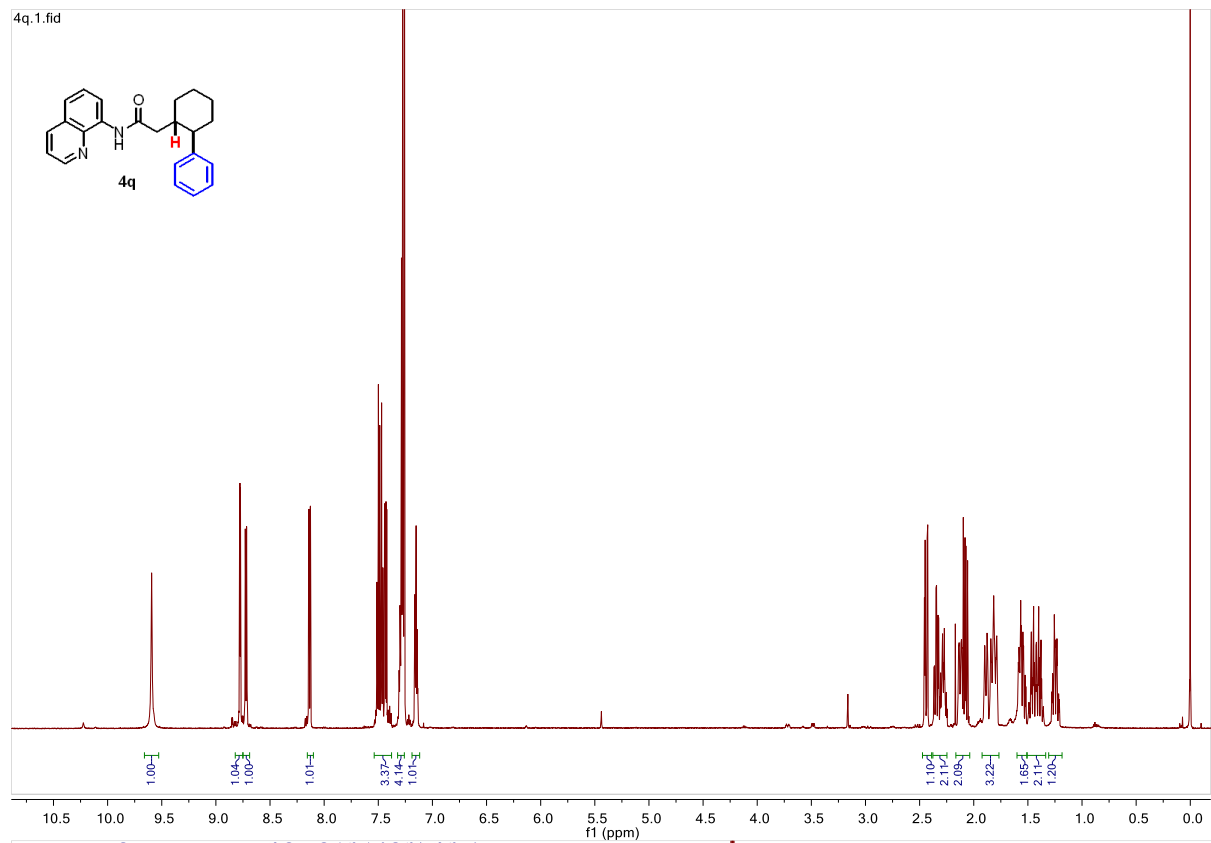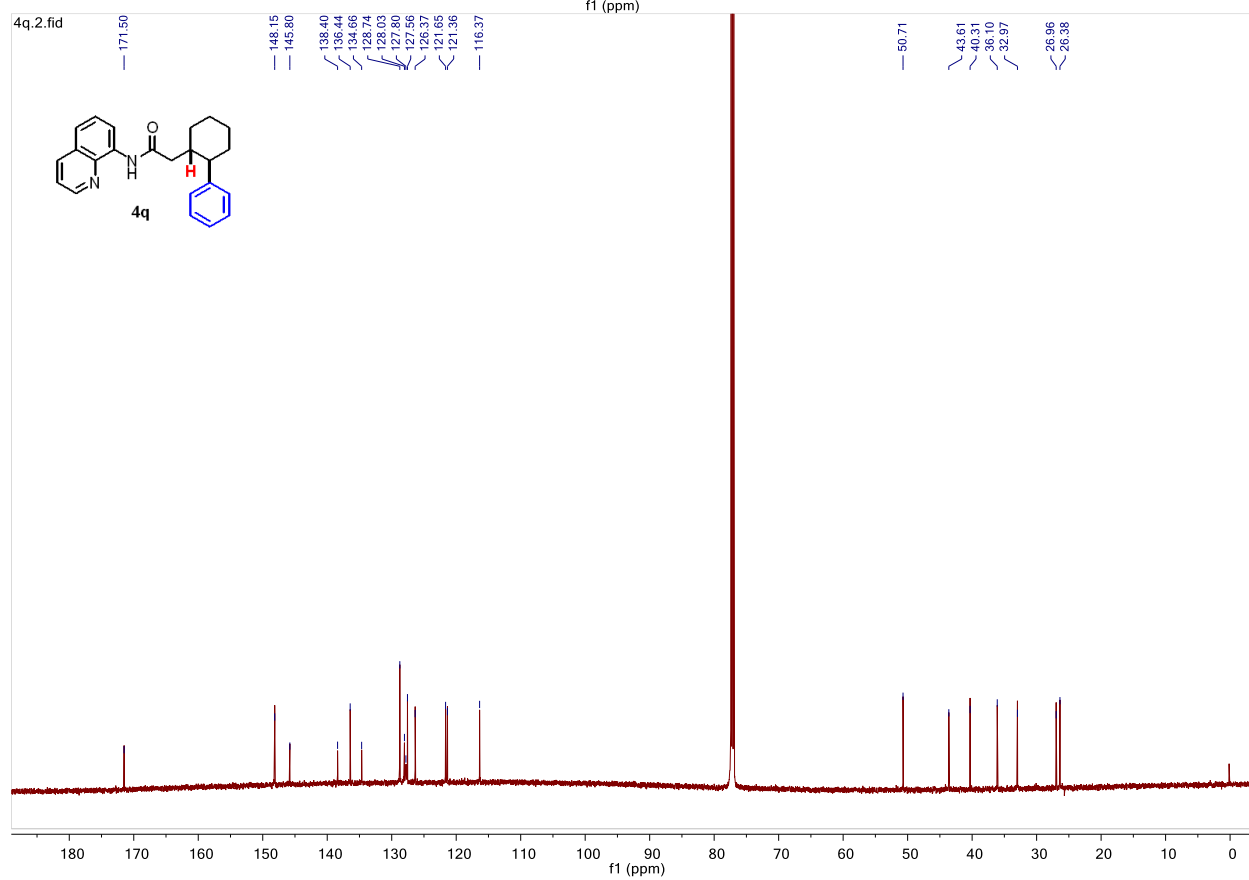

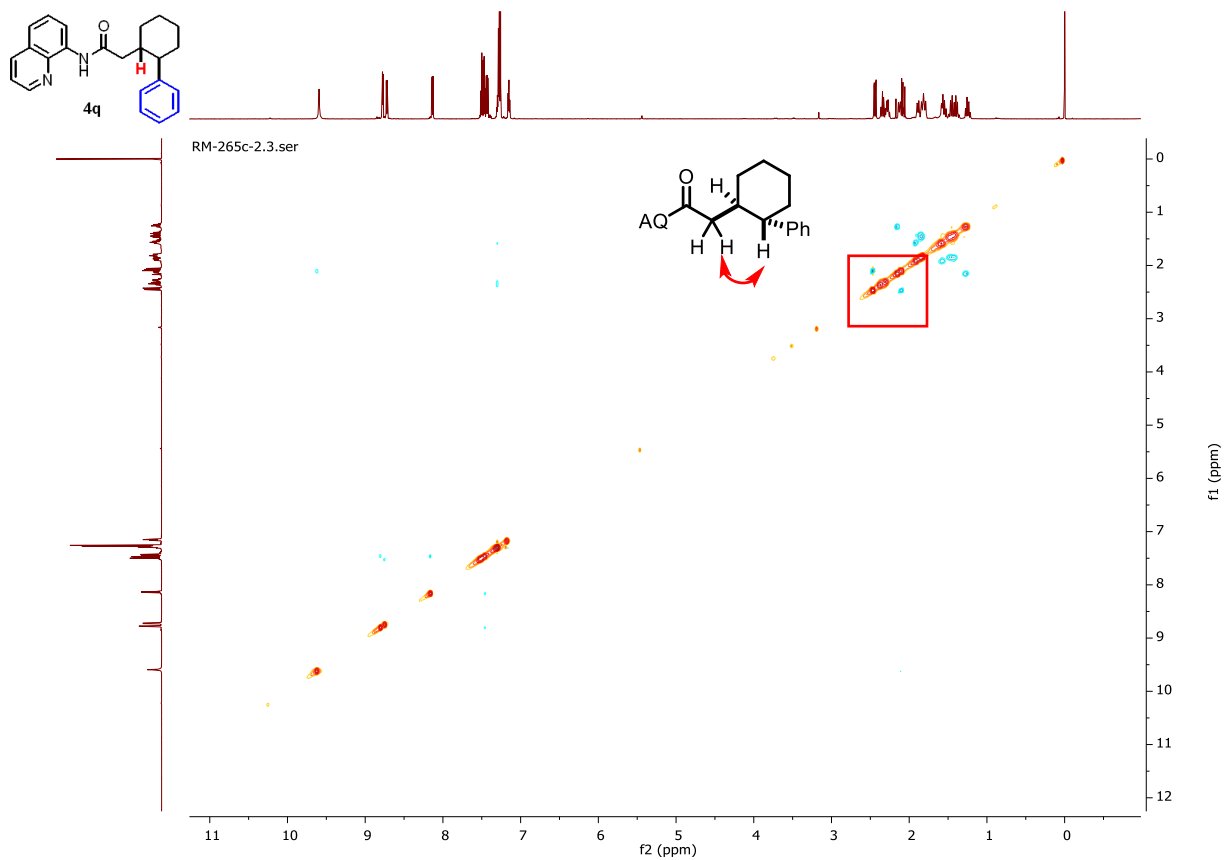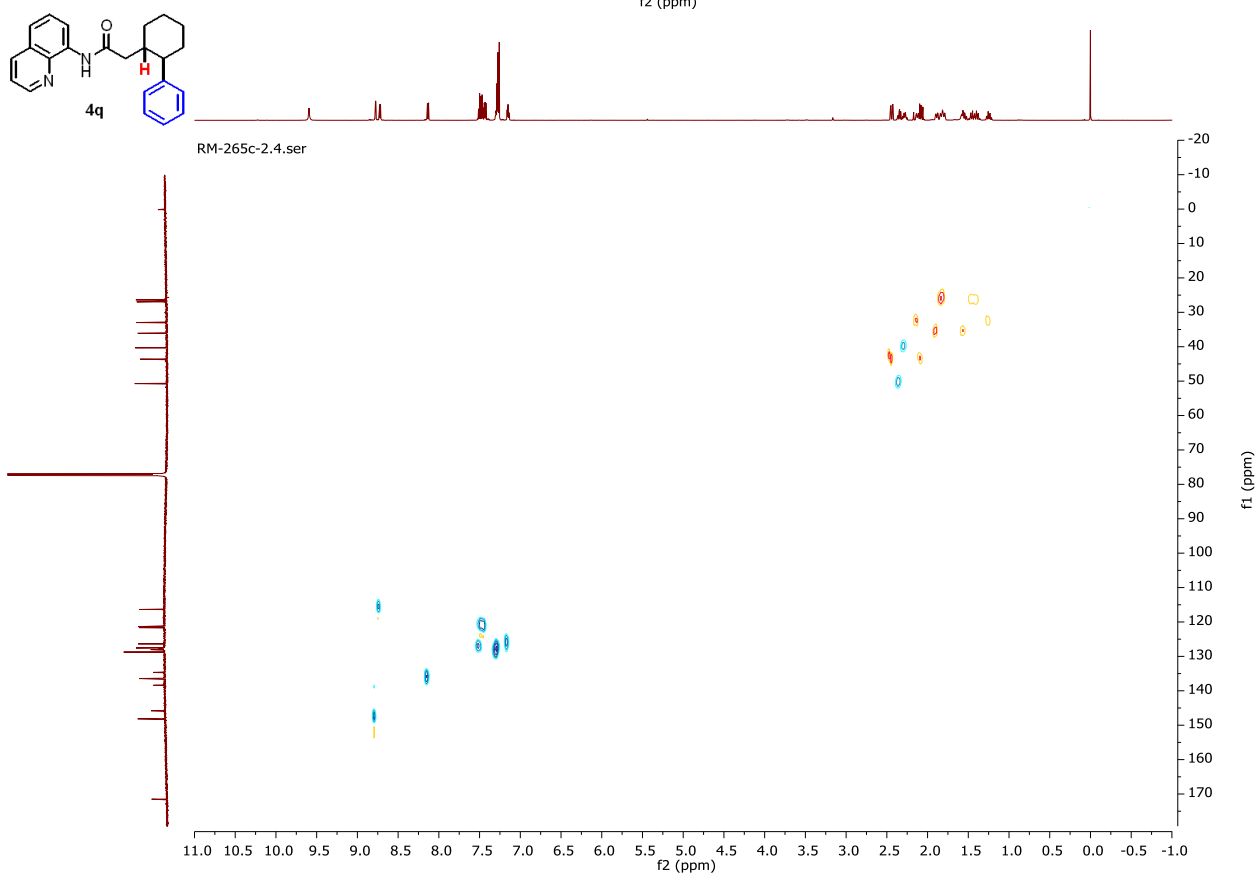

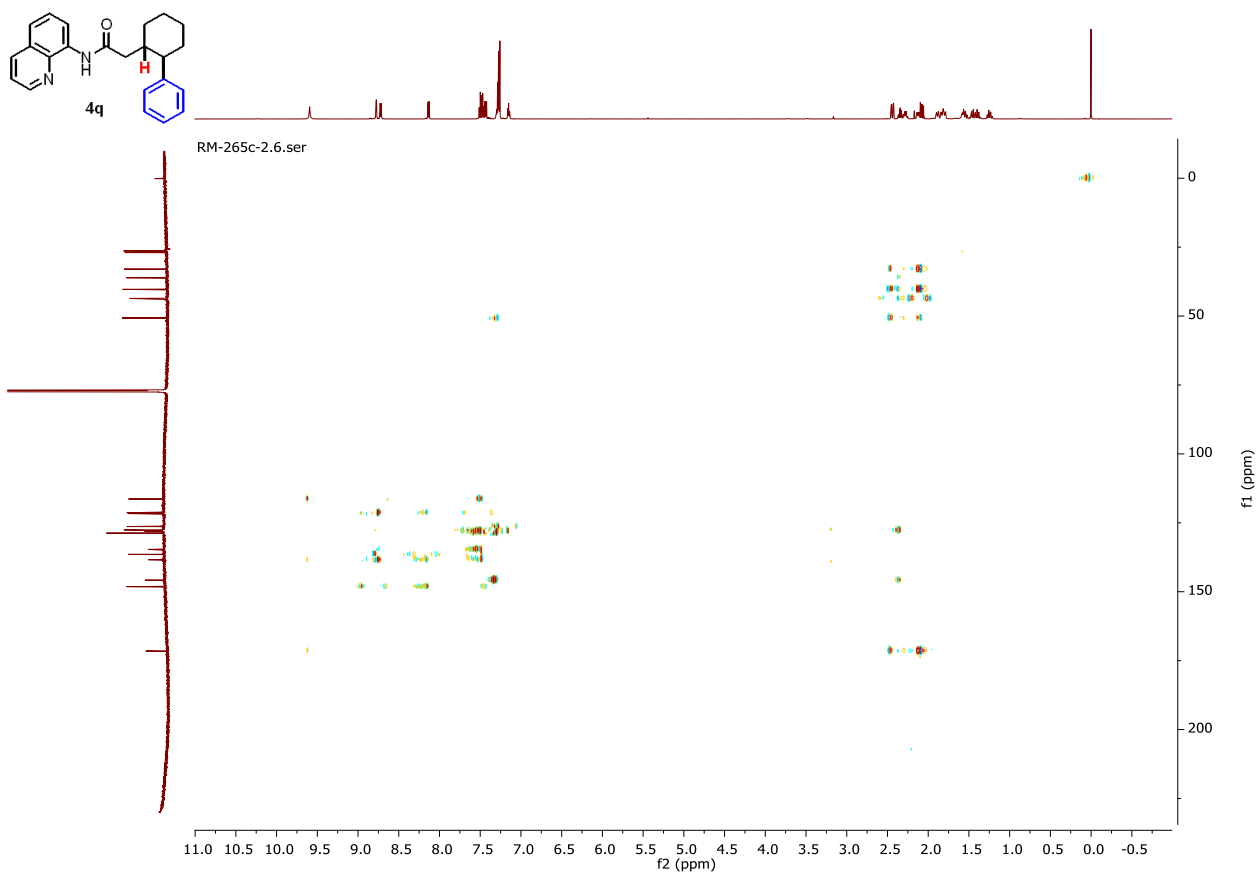

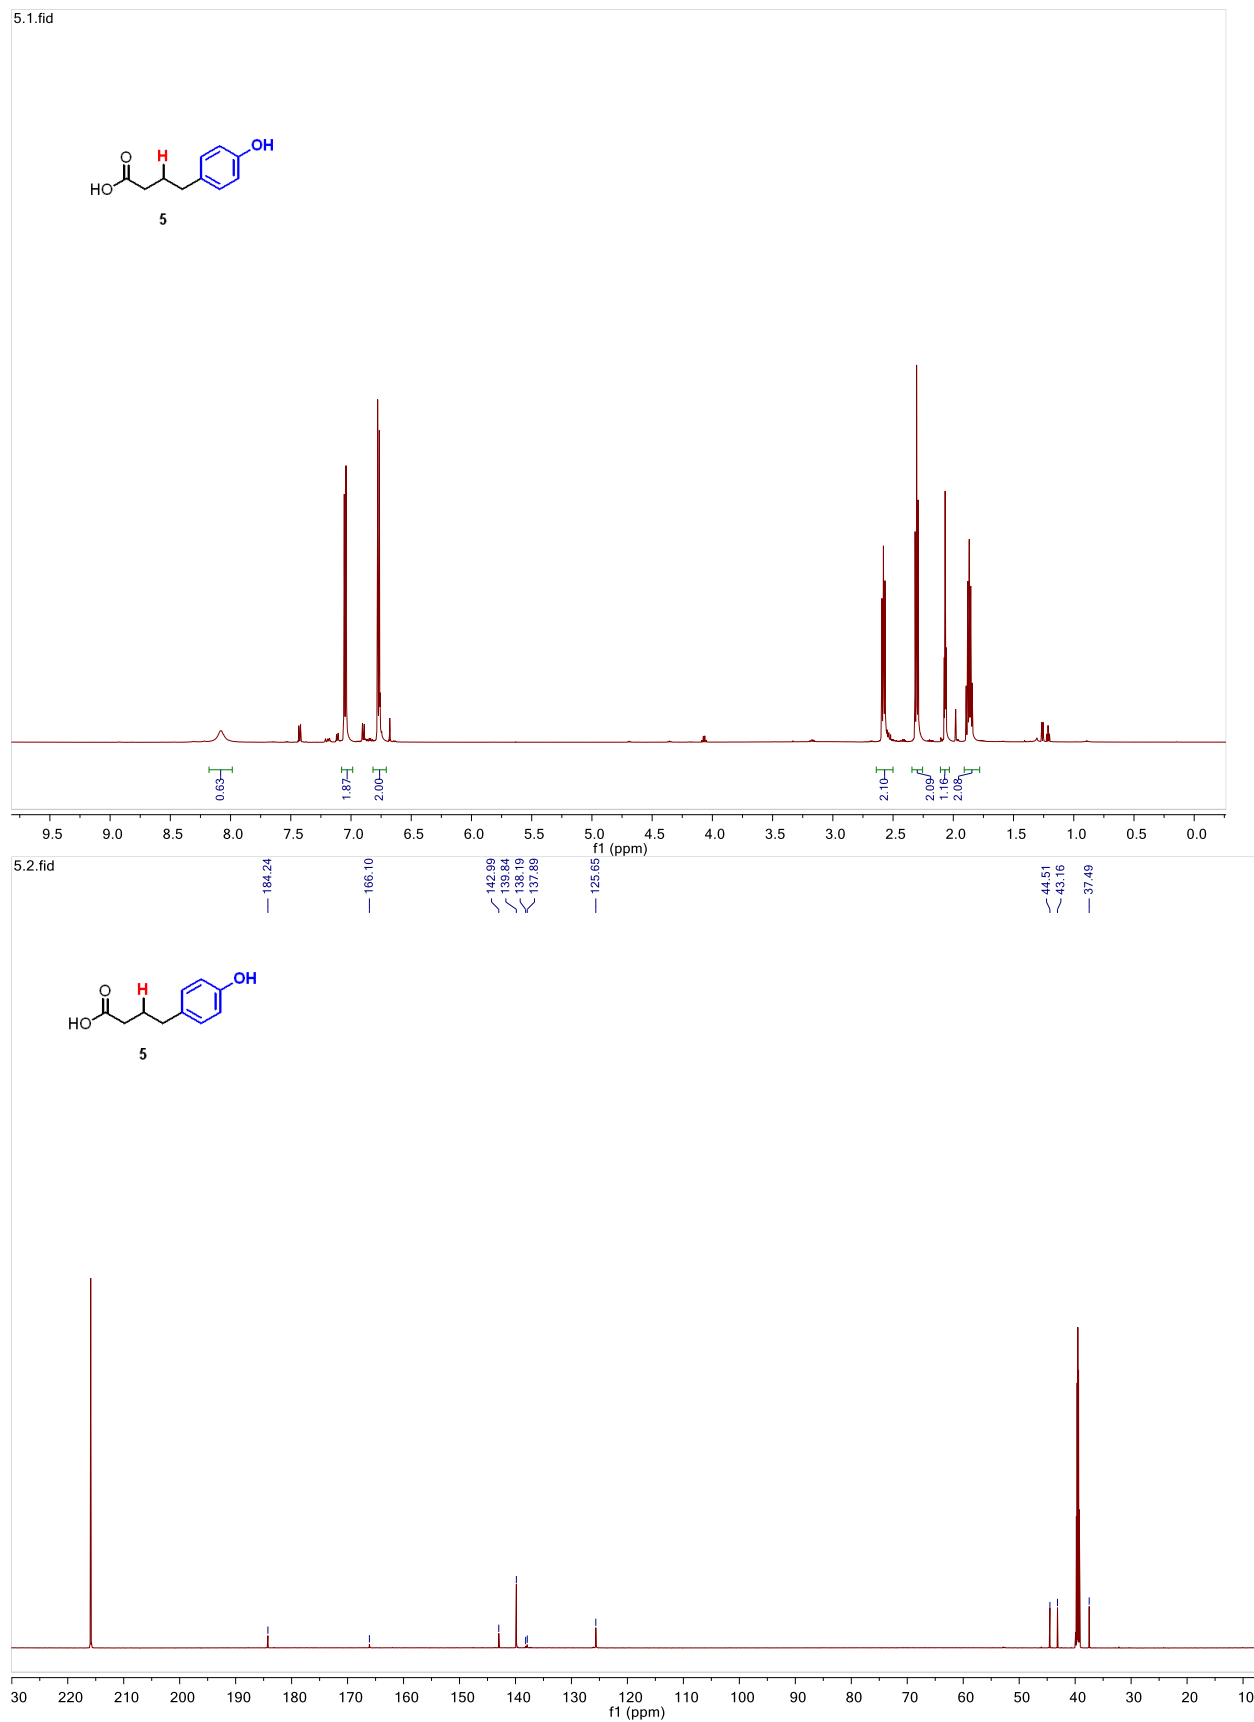

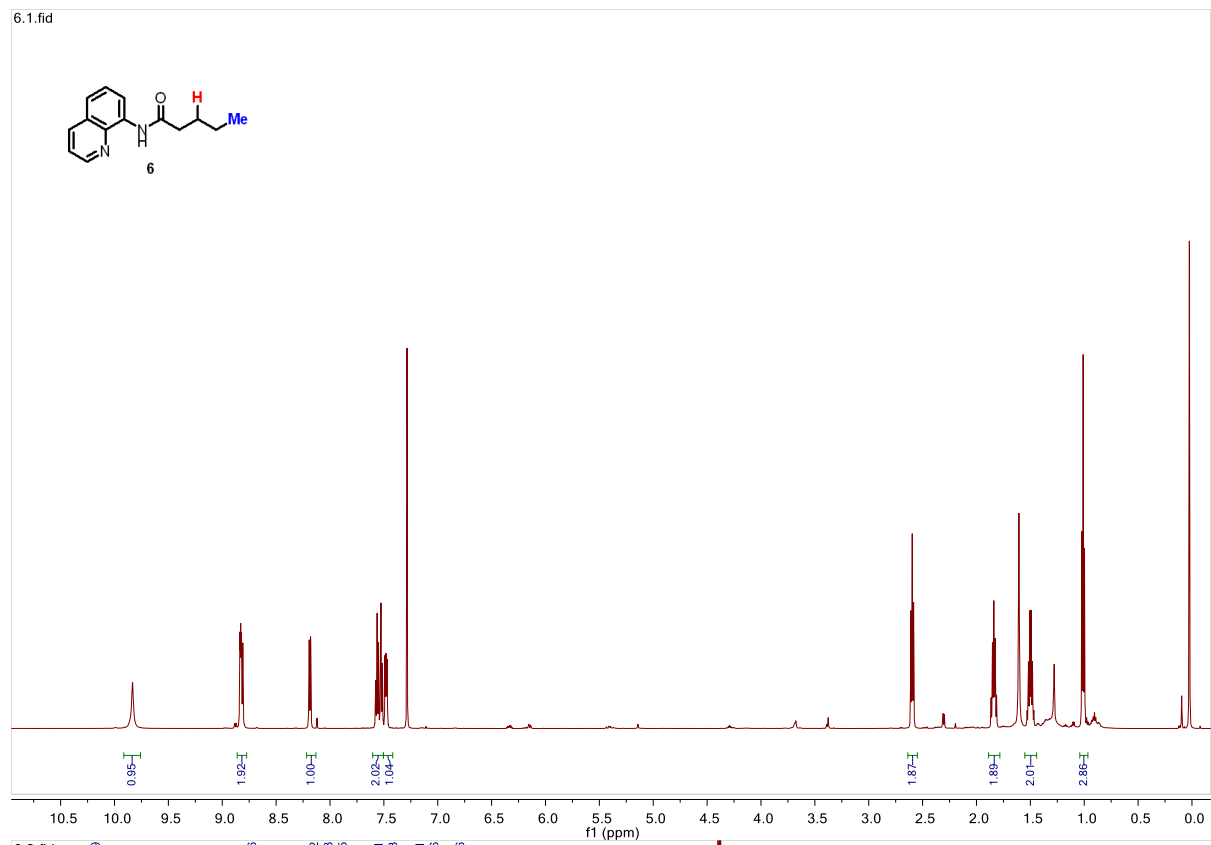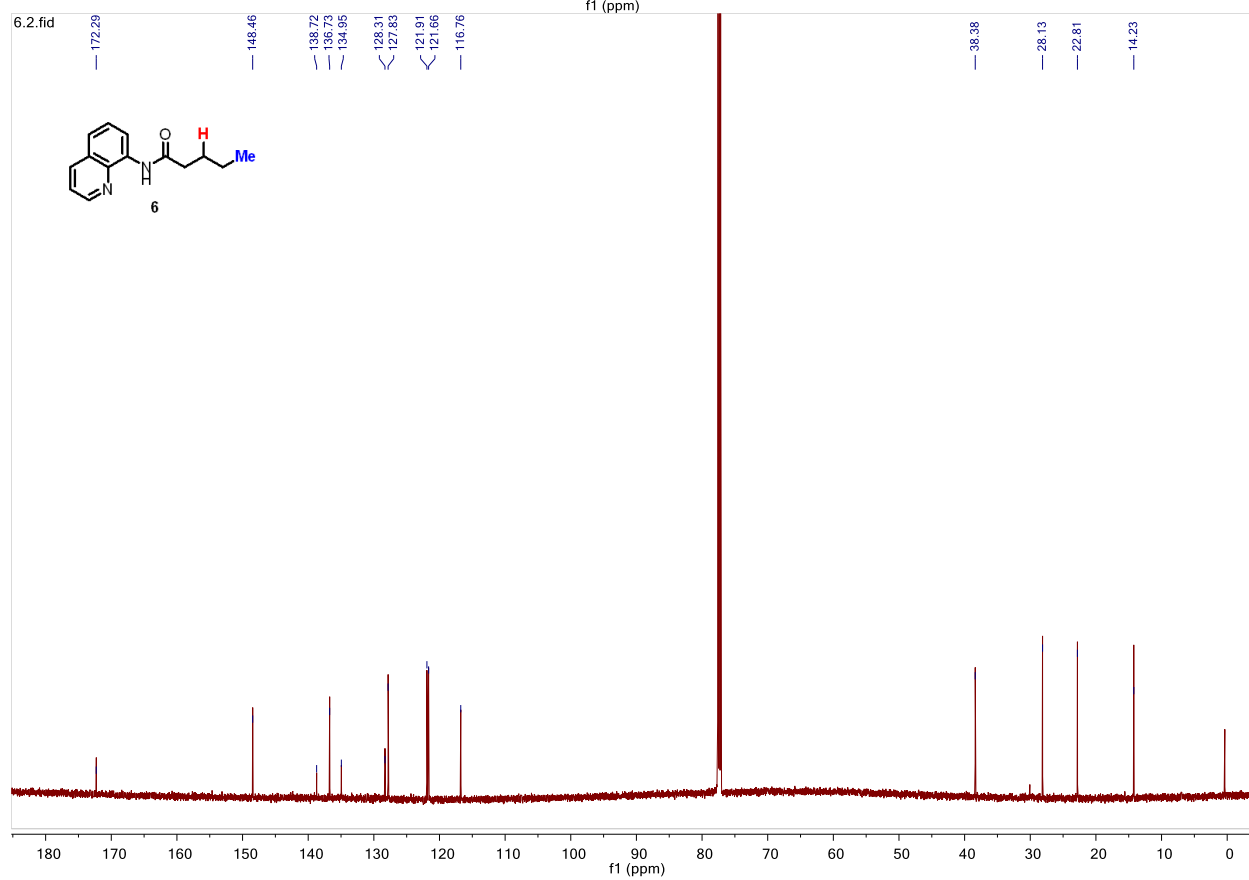

## X-ray Crystallographic Methods and Results for 3j

### Experimental Summary

The single crystal X-ray diffraction studies were carried out on a Bruker Pt 135 CCD diffractometer equipped with Cu K<sub>α</sub> radiation ( $\lambda = 1.54179$ ). Crystals of the subject compound were used as received (grown from MeCN). A 0.290 x 0.170 x 0.125 mm light violet irregular crystal was mounted on a Cryoloop with Paratone oil.

Data were collected in a nitrogen gas stream at 100(2) K using  $\omega$  and  $\nu$  scans. Crystal-to-detector distance was 45 mm using exposure time 2 and 4s depending on the detector  $2\theta$  position with a scan width of 1.50°. Data collection was 99.5% complete to 67.50° in  $\theta$ . A total of 19137 reflections were collected covering the indices,  $-13 \leq h \leq 13$ ,  $-18 \leq k \leq 18$ ,  $-11 \leq l \leq 11$ . 2971 reflections were found to be symmetry independent, with a  $R_{\text{int}}$  of 0.0359. Indexing and unit cell refinement indicated a **Primitive, Monoclinic** lattice. The space group was found to be ***P2<sub>1</sub>/c***. The data were integrated using the Bruker SAINT Software program and scaled using the SADABS software program. Solution by direct methods (SHELXT) produced a complete phasing model consistent with the proposed structure.

All nonhydrogen atoms were refined anisotropically by full-matrix least-squares (SHELXL-2014). All carbon bonded hydrogen atoms were placed using a riding model. Their positions were constrained relative to their parent atom using the appropriate HFIX command in SHELXL-2014.

Hydrogen atom bonded to Oxygen atom was refined using HXIF 148 command.

Crystallographic data are summarized in Table S7.

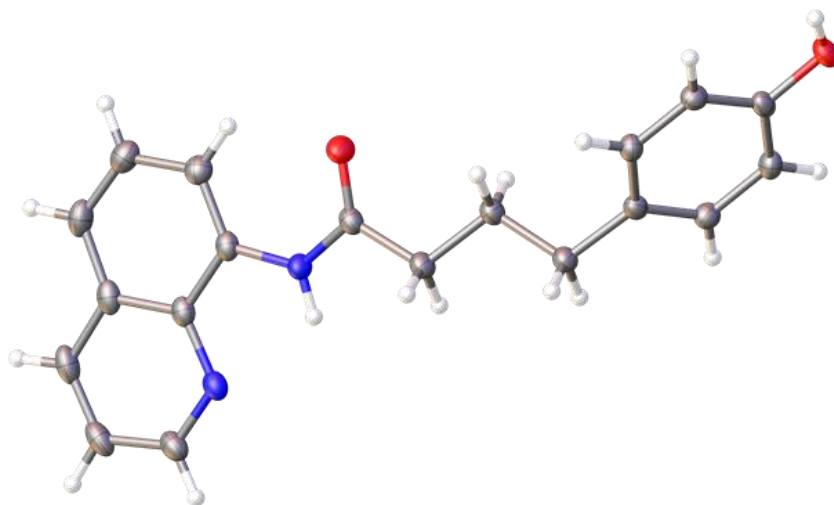

**Table S7.** Crystal data and structure refinement for **3j** (Engle94).

|                                   |                                                               |                    |
|-----------------------------------|---------------------------------------------------------------|--------------------|
| Report date                       | 2018-03-15                                                    |                    |
| Identification code               | engle94                                                       |                    |
| Empirical formula                 | C <sub>19</sub> H <sub>18</sub> N <sub>2</sub> O <sub>2</sub> |                    |
| Molecular formula                 | C <sub>19</sub> H <sub>18</sub> N <sub>2</sub> O <sub>2</sub> |                    |
| Formula weight                    | 306.35                                                        |                    |
| Temperature                       | 100.0 K                                                       |                    |
| Wavelength                        | 1.54178 Å                                                     |                    |
| Crystal system                    | Monoclinic                                                    |                    |
| Space group                       | P 1 21/c 1                                                    |                    |
| Unit cell dimensions              | a = 11.2477(4) Å                                              | a = 90°.           |
|                                   | b = 15.3784(5) Å                                              | b = 114.2040(10)°. |
|                                   | c = 9.6298(3) Å                                               | g = 90°.           |
| Volume                            | 1519.25(9) Å <sup>3</sup>                                     |                    |
| Z                                 | 4                                                             |                    |
| Density (calculated)              | 1.339 Mg/m <sup>3</sup>                                       |                    |
| Absorption coefficient            | 0.704 mm <sup>-1</sup>                                        |                    |
| F(000)                            | 648                                                           |                    |
| Crystal size                      | 0.29 x 0.17 x 0.125 mm <sup>3</sup>                           |                    |
| Crystal color, habit              | light violet irregular                                        |                    |
| Theta range for data collection   | 4.309 to 72.273°.                                             |                    |
| Index ranges                      | -13<=h<=13, -18<=k<=18, -11<=l<=11                            |                    |
| Reflections collected             | 19137                                                         |                    |
| Independent reflections           | 2971 [R(int) = 0.0359]                                        |                    |
| Completeness to theta = 67.500°   | 99.5 %                                                        |                    |
| Absorption correction             | Semi-empirical from equivalents                               |                    |
| Max. and min. transmission        | 0.5230 and 0.4401                                             |                    |
| Refinement method                 | Full-matrix least-squares on F <sup>2</sup>                   |                    |
| Data / restraints / parameters    | 2971 / 0 / 210                                                |                    |
| Goodness-of-fit on F <sup>2</sup> | 1.036                                                         |                    |
| Final R indices [I>2sigma(I)]     | R1 = 0.0350, wR2 = 0.0906                                     |                    |
| R indices (all data)              | R1 = 0.0368, wR2 = 0.0925                                     |                    |
| Largest diff. peak and hole       | 0.337 and -0.149 e.Å <sup>-3</sup>                            |                    |

**Table S8.** Atomic coordinates ( $\times 10^4$ ) and equivalent isotropic displacement parameters ( $\text{\AA}^2 \times 10^3$ ) for Engle94.  $U(\text{eq})$  is defined as one third of the trace of the orthogonalized  $U^{ij}$  tensor.

|       | x       | y       | z        | U(eq) |
|-------|---------|---------|----------|-------|
| O(1)  | 2999(1) | 5050(1) | 4562(1)  | 31(1) |
| O(2)  | 7322(1) | 3528(1) | 13897(1) | 27(1) |
| N(1)  | 613(1)  | 3329(1) | -2(1)    | 24(1) |
| N(2)  | 1991(1) | 4083(1) | 2655(1)  | 22(1) |
| C(1)  | -92(1)  | 2943(1) | -1308(1) | 27(1) |
| C(2)  | -362(1) | 3310(1) | -2748(1) | 30(1) |
| C(3)  | 126(1)  | 4115(1) | -2813(1) | 29(1) |
| C(4)  | 889(1)  | 4564(1) | -1451(1) | 25(1) |
| C(5)  | 1449(1) | 5394(1) | -1404(1) | 29(1) |
| C(6)  | 2174(1) | 5778(1) | -34(1)   | 29(1) |
| C(7)  | 2377(1) | 5366(1) | 1359(1)  | 25(1) |
| C(8)  | 1847(1) | 4561(1) | 1353(1)  | 21(1) |
| C(9)  | 1096(1) | 4135(1) | -61(1)   | 22(1) |
| C(10) | 2521(1) | 4327(1) | 4139(1)  | 22(1) |
| C(11) | 2456(1) | 3636(1) | 5228(1)  | 23(1) |
| C(12) | 3445(1) | 3770(1) | 6862(1)  | 23(1) |
| C(13) | 3419(1) | 3022(1) | 7900(1)  | 22(1) |
| C(14) | 4409(1) | 3137(1) | 9527(1)  | 20(1) |
| C(15) | 5379(1) | 2519(1) | 10235(1) | 22(1) |
| C(16) | 6333(1) | 2648(1) | 11700(1) | 23(1) |
| C(17) | 6324(1) | 3403(1) | 12487(1) | 21(1) |
| C(18) | 5327(1) | 4006(1) | 11831(1) | 22(1) |
| C(19) | 4394(1) | 3874(1) | 10363(1) | 22(1) |



**Table S9.** Bond lengths [ $\text{\AA}$ ] and angles [ $^\circ$ ] for Engle94.

|              |            |                  |            |
|--------------|------------|------------------|------------|
| O(1)-C(10)   | 1.2290(13) | C(14)-C(19)      | 1.3941(15) |
| O(2)-H(2)    | 0.899(17)  | C(15)-H(15)      | 0.9500     |
| O(2)-C(17)   | 1.3752(13) | C(15)-C(16)      | 1.3927(15) |
| N(1)-C(1)    | 1.3208(14) | C(16)-H(16)      | 0.9500     |
| N(1)-C(9)    | 1.3631(15) | C(16)-C(17)      | 1.3878(15) |
| N(2)-H(2A)   | 0.8800     | C(17)-C(18)      | 1.3919(15) |
| N(2)-C(8)    | 1.4044(13) | C(18)-H(18)      | 0.9500     |
| N(2)-C(10)   | 1.3563(13) | C(18)-C(19)      | 1.3876(15) |
| C(1)-H(1)    | 0.9500     | C(19)-H(19)      | 0.9500     |
| C(1)-C(2)    | 1.4105(16) |                  |            |
| C(2)-H(2B)   | 0.9500     | C(17)-O(2)-H(2)  | 109.5      |
| C(2)-C(3)    | 1.3652(18) | C(1)-N(1)-C(9)   | 117.57(10) |
| C(3)-H(3)    | 0.9500     | C(8)-N(2)-H(2A)  | 115.3      |
| C(3)-C(4)    | 1.4179(16) | C(10)-N(2)-H(2A) | 115.3      |
| C(4)-C(5)    | 1.4162(17) | C(10)-N(2)-C(8)  | 129.46(9)  |
| C(4)-C(9)    | 1.4231(15) | N(1)-C(1)-H(1)   | 118.0      |
| C(5)-H(5)    | 0.9500     | N(1)-C(1)-C(2)   | 124.01(11) |
| C(5)-C(6)    | 1.3684(17) | C(2)-C(1)-H(1)   | 118.0      |
| C(6)-H(6)    | 0.9500     | C(1)-C(2)-H(2B)  | 120.7      |
| C(6)-C(7)    | 1.4149(16) | C(3)-C(2)-C(1)   | 118.61(10) |
| C(7)-H(7)    | 0.9500     | C(3)-C(2)-H(2B)  | 120.7      |
| C(7)-C(8)    | 1.3736(16) | C(2)-C(3)-H(3)   | 119.9      |
| C(8)-C(9)    | 1.4331(15) | C(2)-C(3)-C(4)   | 120.11(10) |
| C(10)-C(11)  | 1.5162(15) | C(4)-C(3)-H(3)   | 119.9      |
| C(11)-H(11A) | 0.9900     | C(3)-C(4)-C(9)   | 116.57(11) |
| C(11)-H(11B) | 0.9900     | C(5)-C(4)-C(3)   | 124.14(10) |
| C(11)-C(12)  | 1.5229(14) | C(5)-C(4)-C(9)   | 119.28(10) |
| C(12)-H(12A) | 0.9900     | C(4)-C(5)-H(5)   | 120.0      |
| C(12)-H(12B) | 0.9900     | C(6)-C(5)-C(4)   | 120.07(10) |
| C(12)-C(13)  | 1.5314(15) | C(6)-C(5)-H(5)   | 120.0      |
| C(13)-H(13A) | 0.9900     | C(5)-C(6)-H(6)   | 119.3      |
| C(13)-H(13B) | 0.9900     | C(5)-C(6)-C(7)   | 121.43(11) |
| C(13)-C(14)  | 1.5153(14) | C(7)-C(6)-H(6)   | 119.3      |
| C(14)-C(15)  | 1.3963(15) | C(6)-C(7)-H(7)   | 120.0      |

|                     |            |                   |            |
|---------------------|------------|-------------------|------------|
| C(8)-C(7)-C(6)      | 119.94(10) | C(17)-C(16)-H(16) | 120.1      |
| C(8)-C(7)-H(7)      | 120.0      | O(2)-C(17)-C(16)  | 118.09(10) |
| N(2)-C(8)-C(9)      | 114.63(9)  | O(2)-C(17)-C(18)  | 122.29(10) |
| C(7)-C(8)-N(2)      | 125.25(10) | C(16)-C(17)-C(18) | 119.62(10) |
| C(7)-C(8)-C(9)      | 120.10(10) | C(17)-C(18)-H(18) | 120.1      |
| N(1)-C(9)-C(4)      | 123.11(10) | C(19)-C(18)-C(17) | 119.77(10) |
| N(1)-C(9)-C(8)      | 117.73(9)  | C(19)-C(18)-H(18) | 120.1      |
| C(4)-C(9)-C(8)      | 119.16(10) | C(14)-C(19)-H(19) | 119.2      |
| O(1)-C(10)-N(2)     | 122.91(10) | C(18)-C(19)-C(14) | 121.64(10) |
| O(1)-C(10)-C(11)    | 122.91(9)  | C(18)-C(19)-H(19) | 119.2      |
| N(2)-C(10)-C(11)    | 114.17(9)  |                   |            |
| C(10)-C(11)-H(11A)  | 108.9      |                   |            |
| C(10)-C(11)-H(11B)  | 108.9      |                   |            |
| C(10)-C(11)-C(12)   | 113.49(9)  |                   |            |
| H(11A)-C(11)-H(11B) | 107.7      |                   |            |
| C(12)-C(11)-H(11A)  | 108.9      |                   |            |
| C(12)-C(11)-H(11B)  | 108.9      |                   |            |
| C(11)-C(12)-H(12A)  | 109.3      |                   |            |
| C(11)-C(12)-H(12B)  | 109.3      |                   |            |
| C(11)-C(12)-C(13)   | 111.82(9)  |                   |            |
| H(12A)-C(12)-H(12B) | 107.9      |                   |            |
| C(13)-C(12)-H(12A)  | 109.3      |                   |            |
| C(13)-C(12)-H(12B)  | 109.3      |                   |            |
| C(12)-C(13)-H(13A)  | 109.1      |                   |            |
| C(12)-C(13)-H(13B)  | 109.1      |                   |            |
| H(13A)-C(13)-H(13B) | 107.8      |                   |            |
| C(14)-C(13)-C(12)   | 112.62(8)  |                   |            |
| C(14)-C(13)-H(13A)  | 109.1      |                   |            |
| C(14)-C(13)-H(13B)  | 109.1      |                   |            |
| C(15)-C(14)-C(13)   | 121.41(9)  |                   |            |
| C(19)-C(14)-C(13)   | 120.95(9)  |                   |            |
| C(19)-C(14)-C(15)   | 117.63(10) |                   |            |
| C(14)-C(15)-H(15)   | 119.3      |                   |            |
| C(16)-C(15)-C(14)   | 121.33(10) |                   |            |
| C(16)-C(15)-H(15)   | 119.3      |                   |            |
| C(15)-C(16)-H(16)   | 120.1      |                   |            |
| C(17)-C(16)-C(15)   | 119.88(10) |                   |            |

**Table S10.** Anisotropic displacement parameters ( $\text{\AA}^2 \times 10^3$ ) for Engle94. The anisotropic displacement factor exponent takes the form:  $-2p^2 [ h^2 a^2 U^{11} + \dots + 2 h k a^* b^* U^{12} ]$

|       | U <sup>11</sup> | U <sup>22</sup> | U <sup>33</sup> | U <sup>23</sup> | U <sup>13</sup> | U <sup>12</sup> |
|-------|-----------------|-----------------|-----------------|-----------------|-----------------|-----------------|
| O(1)  | 41(1)           | 25(1)           | 21(1)           | -2(1)           | 7(1)            | -4(1)           |
| O(2)  | 26(1)           | 32(1)           | 17(1)           | -1(1)           | 2(1)            | -1(1)           |
| N(1)  | 22(1)           | 26(1)           | 19(1)           | -1(1)           | 5(1)            | 4(1)            |
| N(2)  | 27(1)           | 20(1)           | 17(1)           | 0(1)            | 6(1)            | -1(1)           |
| C(1)  | 23(1)           | 30(1)           | 23(1)           | -4(1)           | 4(1)            | 3(1)            |
| C(2)  | 23(1)           | 42(1)           | 19(1)           | -5(1)           | 3(1)            | 6(1)            |
| C(3)  | 25(1)           | 45(1)           | 17(1)           | 4(1)            | 7(1)            | 11(1)           |
| C(4)  | 22(1)           | 33(1)           | 20(1)           | 4(1)            | 9(1)            | 10(1)           |
| C(5)  | 30(1)           | 34(1)           | 26(1)           | 10(1)           | 15(1)           | 9(1)            |
| C(6)  | 31(1)           | 26(1)           | 33(1)           | 6(1)            | 17(1)           | 4(1)            |
| C(7)  | 26(1)           | 24(1)           | 25(1)           | 0(1)            | 11(1)           | 2(1)            |
| C(8)  | 21(1)           | 24(1)           | 18(1)           | 2(1)            | 8(1)            | 6(1)            |
| C(9)  | 20(1)           | 25(1)           | 19(1)           | 2(1)            | 7(1)            | 6(1)            |
| C(10) | 21(1)           | 24(1)           | 18(1)           | -1(1)           | 5(1)            | 3(1)            |
| C(11) | 24(1)           | 25(1)           | 17(1)           | -1(1)           | 6(1)            | -1(1)           |
| C(12) | 24(1)           | 24(1)           | 17(1)           | -1(1)           | 6(1)            | -1(1)           |
| C(13) | 23(1)           | 22(1)           | 18(1)           | -1(1)           | 6(1)            | -1(1)           |
| C(14) | 21(1)           | 22(1)           | 17(1)           | 1(1)            | 7(1)            | -2(1)           |
| C(15) | 26(1)           | 21(1)           | 20(1)           | -1(1)           | 10(1)           | 0(1)            |
| C(16) | 22(1)           | 24(1)           | 22(1)           | 4(1)            | 7(1)            | 3(1)            |
| C(17) | 21(1)           | 26(1)           | 15(1)           | 1(1)            | 6(1)            | -4(1)           |
| C(18) | 26(1)           | 21(1)           | 20(1)           | -2(1)           | 10(1)           | -2(1)           |
| C(19) | 21(1)           | 22(1)           | 20(1)           | 2(1)            | 7(1)            | 2(1)            |

**Table S11.** Hydrogen coordinates ( $\times 10^4$ ) and isotropic displacement parameters ( $\text{\AA}^2 \times 10^{-3}$ ) for Engle94.

|        | x       | y        | z         | U(eq) |
|--------|---------|----------|-----------|-------|
| H(2)   | 7176(8) | 4018(11) | 14313(11) | 41    |
| H(2A)  | 1694    | 3546     | 2484      | 27    |
| H(1)   | -437    | 2384     | -1275     | 33    |
| H(2B)  | -872    | 3004     | -3655     | 36    |
| H(3)   | -47     | 4374     | -3771     | 35    |
| H(5)   | 1320    | 5685     | -2325     | 35    |
| H(6)   | 2550    | 6333     | -18       | 34    |
| H(7)   | 2879    | 5646     | 2297      | 30    |
| H(11A) | 2606    | 3060     | 4871      | 27    |
| H(11B) | 1569    | 3634     | 5209      | 27    |
| H(12A) | 3253    | 4322     | 7256      | 27    |
| H(12B) | 4329    | 3815     | 6879      | 27    |
| H(13A) | 2537    | 2982     | 7889      | 27    |
| H(13B) | 3597    | 2469     | 7494      | 27    |
| H(15)  | 5389    | 1999     | 9706      | 26    |
| H(16)  | 6988    | 2222     | 12160     | 28    |
| H(18)  | 5284    | 4507     | 12388     | 27    |
| H(19)  | 3729    | 4296     | 9915      | 26    |

**Table S12.** Hydrogen bonds for Engle94 [ $\text{\AA}$  and  $^\circ$ ].

| D-H...A            | d(D-H) | d(H...A) | d(D...A)   | $\angle(\text{DHA})$ |
|--------------------|--------|----------|------------|----------------------|
| O(2)-H(2)...O(1)#1 | 0.90   | 1.86     | 2.7487(12) | 171.8                |

Symmetry transformations used to generate equivalent atoms:

#1 -x+1,-y+1,-z+2
